# Supplementary material
Source: publisher figshare collection journal article supplement (https://diabetesjournals.figshare.com/ndownloader/files/27952974)
Supplement: Supplementary file 1 [file 27952974]

## Sheet: HTM_Low
Symbol	HTM.Basal_3h.avg	HTM.Low_3h.avg	HTM_Low_3h.t	HTM_Low_3h.p	HTM_Low_3h.FDR	HTM_Low_3h.logFC	HTM_Low_3h.FC	Description
Ttll3	5.51	4.73	-6.1	1.44e-07	0.00197	-0.933	-1.91	tubulin tyrosine ligase-like family, member 3 [Source:MGI Symbol;Acc:MGI:2141418]
Kcna2	8.07	8.86	5.98	2.24e-07	0.00197	0.841	1.79	potassium voltage-gated channel, shaker-related subfamily, member 2 [Source:MGI Symbol;Acc:MGI:96659]
Akap10	3.69	4.72	5.73	5.38e-07	0.00281	1.03	2.04	A kinase (PRKA) anchor protein 10 [Source:MGI Symbol;Acc:MGI:1890218]
Cited1	4.57	3.05	-5.69	6.39e-07	0.00281	-1.49	-2.81	Cbp/p300-interacting transactivator with Glu/Asp-rich carboxy-terminal domain 1 [Source:MGI Symbol;Acc:MGI:108023]
Rhobtb3	5.3	6.08	5.55	1.02e-06	0.00305	0.923	1.9	Rho-related BTB domain containing 3 [Source:MGI Symbol;Acc:MGI:1920546]
Ttll7	7.29	8.22	5.55	1.04e-06	0.00305	1	2	tubulin tyrosine ligase-like family, member 7 [Source:MGI Symbol;Acc:MGI:1918142]
Zfp800	3.21	4.28	5.48	1.35e-06	0.00323	1.3	2.46	zinc finger protein 800 [Source:MGI Symbol;Acc:MGI:1889334]
Uhmk1	8.52	9.28	5.4	1.73e-06	0.00323	0.771	1.71	U2AF homology motif (UHM) kinase 1 [Source:MGI Symbol;Acc:MGI:1341908]
Tcp11l1	4.64	5.76	5.33	2.27e-06	0.00323	1.2	2.3	t-complex 11 like 1 [Source:MGI Symbol;Acc:MGI:2444263]
Zfp397	5.03	5.84	5.31	2.47e-06	0.00323	0.963	1.95	zinc finger protein 397 [Source:MGI Symbol;Acc:MGI:1916506]
Dennd4a	6.18	6.9	5.29	2.62e-06	0.00323	0.72	1.65	DENN/MADD domain containing 4A [Source:MGI Symbol;Acc:MGI:2142979]
Myo5a	8.2	8.91	5.29	2.63e-06	0.00323	0.714	1.64	myosin VA [Source:MGI Symbol;Acc:MGI:105976]
Tnks	5.53	7.09	5.28	2.7e-06	0.00323	1.47	2.77	tankyrase, TRF1-interacting ankyrin-related ADP-ribose polymerase [Source:MGI Symbol;Acc:MGI:1341087]
Trim59	3.26	4.35	5.28	2.74e-06	0.00323	1.39	2.63	tripartite motif-containing 59 [Source:MGI Symbol;Acc:MGI:1914199]
Stard4	4.87	5.54	5.22	3.33e-06	0.00323	0.725	1.65	StAR-related lipid transfer (START) domain containing 4 [Source:MGI Symbol;Acc:MGI:2156764]
Lpgat1	7.3	8.13	5.21	3.48e-06	0.00323	0.801	1.74	lysophosphatidylglycerol acyltransferase 1 [Source:MGI Symbol;Acc:MGI:2446186]
Ppargc1a	5.95	6.64	5.2	3.59e-06	0.00323	0.797	1.74	peroxisome proliferative activated receptor, gamma, coactivator 1 alpha [Source:MGI Symbol;Acc:MGI:1342774]
Atp8a2	4.28	5.49	5.19	3.66e-06	0.00323	1.19	2.29	ATPase, aminophospholipid transporter-like, class I, type 8A, member 2 [Source:MGI Symbol;Acc:MGI:1354710]
Usp31	6.26	6.96	5.19	3.7e-06	0.00323	0.78	1.72	ubiquitin specific peptidase 31 [Source:MGI Symbol;Acc:MGI:1923429]
Erbb4	5.71	6.86	5.18	3.82e-06	0.00323	1.22	2.33	v-erb-a erythroblastic leukemia viral oncogene homolog 4 (avian) [Source:MGI Symbol;Acc:MGI:104771]
Lrwd1	4.34	3.69	-5.17	4.01e-06	0.00323	-0.702	-1.63	leucine-rich repeats and WD repeat domain containing 1 [Source:MGI Symbol;Acc:MGI:1918985]
Angptl4	3.75	2.68	-5.16	4.13e-06	0.00323	-1.1	-2.14	angiopoietin-like 4 [Source:MGI Symbol;Acc:MGI:1888999]
1700037H04Rik	5.34	4.5	-5.14	4.42e-06	0.00323	-0.957	-1.94	RIKEN cDNA 1700037H04 gene [Source:MGI Symbol;Acc:MGI:1914576]
Ltbp4	6.1	5.25	-5.13	4.5e-06	0.00323	-1.07	-2.1	latent transforming growth factor beta binding protein 4 [Source:MGI Symbol;Acc:MGI:1321395]
Zfhx4	5.72	6.82	5.13	4.58e-06	0.00323	1.2	2.3	zinc finger homeodomain 4 [Source:MGI Symbol;Acc:MGI:2137668]
Gm43859	0.876	2.85	5.12	4.8e-06	0.00325	2.21	4.63	predicted gene 43859 [Source:MGI Symbol;Acc:MGI:5663996]
Irf2bp1	5.12	4.34	-5.08	5.41e-06	0.00327	-0.985	-1.98	interferon regulatory factor 2 binding protein 1 [Source:MGI Symbol;Acc:MGI:2442159]
Phc3	6.11	7.13	5.07	5.54e-06	0.00327	1.01	2.01	polyhomeotic-like 3 (Drosophila) [Source:MGI Symbol;Acc:MGI:2181434]
Insig1	6.05	6.73	5.07	5.56e-06	0.00327	0.634	1.55	insulin induced gene 1 [Source:MGI Symbol;Acc:MGI:1916289]
Fam63b	6.5	7.42	5.07	5.63e-06	0.00327	1.01	2.01	family with sequence similarity 63, member B [Source:MGI Symbol;Acc:MGI:2443086]
Tmem158	4.94	3.55	-5.06	5.75e-06	0.00327	-1.35	-2.55	transmembrane protein 158 [Source:MGI Symbol;Acc:MGI:1919559]
Scn1a	7.1	8.09	5	7.15e-06	0.00376	1.02	2.03	sodium channel, voltage-gated, type I, alpha [Source:MGI Symbol;Acc:MGI:98246]
Plcxd3	2.66	4.75	5	7.21e-06	0.00376	2.28	4.87	phosphatidylinositol-specific phospholipase C, X domain containing 3 [Source:MGI Symbol;Acc:MGI:2442605]
Dennd5b	5.96	7.02	5	7.26e-06	0.00376	1.21	2.32	DENN/MADD domain containing 5B [Source:MGI Symbol;Acc:MGI:2444273]
1700020I14Rik	6.49	7.65	4.99	7.47e-06	0.00376	1.24	2.36	RIKEN cDNA 1700020I14 gene [Source:MGI Symbol;Acc:MGI:1913852]
Dnajb14	7.11	7.77	4.98	7.74e-06	0.00379	0.683	1.61	DnaJ (Hsp40) homolog, subfamily B, member 14 [Source:MGI Symbol;Acc:MGI:1917854]
Azin1	7.05	7.61	4.97	8.07e-06	0.00384	0.716	1.64	antizyme inhibitor 1 [Source:MGI Symbol;Acc:MGI:1859169]
Celf5	6.9	6.22	-4.95	8.41e-06	0.0039	-0.785	-1.72	CUGBP, Elav-like family member 5 [Source:MGI Symbol;Acc:MGI:2442333]
Klhdc8b	5.44	4.58	-4.93	9.11e-06	0.0039	-0.978	-1.97	kelch domain containing 8B [Source:MGI Symbol;Acc:MGI:1925517]
Bicd1	5.72	6.53	4.93	9.17e-06	0.0039	1.01	2.02	bicaudal D homolog 1 (Drosophila) [Source:MGI Symbol;Acc:MGI:1101760]
Unc80	8.09	8.92	4.92	9.46e-06	0.0039	0.852	1.81	unc-80 homolog (C. elegans) [Source:MGI Symbol;Acc:MGI:2652882]
Gm7061	0.402	-1.69	-4.92	9.46e-06	0.0039	-2.4	-5.29	predicted gene 7061 [Source:MGI Symbol;Acc:MGI:3648315]
Cc2d1b	5.32	4.86	-4.92	9.51e-06	0.0039	-0.636	-1.55	coiled-coil and C2 domain containing 1B [Source:MGI Symbol;Acc:MGI:2443076]
Atn1	6.44	5.93	-4.91	9.78e-06	0.00392	-0.687	-1.61	atrophin 1 [Source:MGI Symbol;Acc:MGI:104725]
Rnf213	3.88	4.93	4.88	1.07e-05	0.00413	0.996	2	ring finger protein 213 [Source:MGI Symbol;Acc:MGI:1289196]
Fam199x	4.74	5.79	4.88	1.08e-05	0.00413	1.25	2.37	family with sequence similarity 199, X-linked [Source:MGI Symbol;Acc:MGI:2384304]
Pik3ca	6.77	7.2	4.88	1.1e-05	0.00413	0.562	1.48	phosphatidylinositol 3-kinase, catalytic, alpha polypeptide [Source:MGI Symbol;Acc:MGI:1206581]
Rftn1	5.28	4.48	-4.85	1.19e-05	0.00422	-0.852	-1.8	raftlin lipid raft linker 1 [Source:MGI Symbol;Acc:MGI:1923688]
Agrp	3.63	1.82	-4.85	1.19e-05	0.00422	-1.95	-3.88	agouti related neuropeptide [Source:MGI Symbol;Acc:MGI:892013]
Nprl3	5.36	4.93	-4.85	1.22e-05	0.00422	-0.536	-1.45	nitrogen permease regulator-like 3 [Source:MGI Symbol;Acc:MGI:109258]
Pank3	6.22	6.96	4.84	1.24e-05	0.00422	0.853	1.81	pantothenate kinase 3 [Source:MGI Symbol;Acc:MGI:2387464]
Gm26803	-1.54	0.442	4.84	1.26e-05	0.00422	2.62	6.13	predicted gene, 26803 [Source:MGI Symbol;Acc:MGI:5477297]
Acd	4.63	4	-4.84	1.27e-05	0.00422	-0.782	-1.72	adrenocortical dysplasia [Source:MGI Symbol;Acc:MGI:87873]
Lmtk3	8.03	7.3	-4.82	1.34e-05	0.00426	-0.831	-1.78	lemur tyrosine kinase 3 [Source:MGI Symbol;Acc:MGI:3039582]
Klhl28	3.14	4.51	4.82	1.35e-05	0.00426	1.48	2.79	kelch-like 28 [Source:MGI Symbol;Acc:MGI:1913939]
Ncor2	7.77	7.2	-4.82	1.35e-05	0.00426	-0.683	-1.61	nuclear receptor co-repressor 2 [Source:MGI Symbol;Acc:MGI:1337080]
Cpeb3	6.98	7.63	4.81	1.4e-05	0.00434	0.638	1.56	cytoplasmic polyadenylation element binding protein 3 [Source:MGI Symbol;Acc:MGI:2443075]
Lemd2	5.04	4.35	-4.79	1.48e-05	0.0045	-0.808	-1.75	LEM domain containing 2 [Source:MGI Symbol;Acc:MGI:2385045]
Rpn2	7.7	7.23	-4.78	1.52e-05	0.00452	-0.54	-1.45	ribophorin II [Source:MGI Symbol;Acc:MGI:98085]
Fam220a	4.81	4.24	-4.78	1.54e-05	0.00452	-0.618	-1.53	family with sequence similarity 220, member A [Source:MGI Symbol;Acc:MGI:1914488]
Igsf9	4.18	3.48	-4.77	1.57e-05	0.00454	-0.75	-1.68	immunoglobulin superfamily, member 9 [Source:MGI Symbol;Acc:MGI:2135283]
Uprt	1.21	3.08	4.76	1.62e-05	0.00459	1.51	2.85	uracil phosphoribosyltransferase (FUR1) homolog (S. cerevisiae) [Source:MGI Symbol;Acc:MGI:2685620]
Abca5	6.07	7	4.75	1.68e-05	0.00469	1.03	2.04	ATP-binding cassette, sub-family A (ABC1), member 5 [Source:MGI Symbol;Acc:MGI:2386607]
Abcb7	5.47	6.16	4.74	1.75e-05	0.00469	0.835	1.78	ATP-binding cassette, sub-family B (MDR/TAP), member 7 [Source:MGI Symbol;Acc:MGI:109533]
Zfp777	4.27	3.44	-4.74	1.75e-05	0.00469	-0.83	-1.78	zinc finger protein 777 [Source:MGI Symbol;Acc:MGI:1919556]
Lnp	5.12	6.11	4.73	1.82e-05	0.00469	1.08	2.12	limb and neural patterns [Source:MGI Symbol;Acc:MGI:1918115]
Adck5	4.57	3.94	-4.73	1.84e-05	0.00469	-0.855	-1.81	aarF domain containing kinase 5 [Source:MGI Symbol;Acc:MGI:2679274]
Aimp2	2.65	1.72	-4.72	1.9e-05	0.00469	-1.21	-2.31	aminoacyl tRNA synthetase complex-interacting multifunctional protein 2 [Source:MGI Symbol;Acc:MGI:2385237]
Zfp120	4.66	5.28	4.71	1.92e-05	0.00469	0.891	1.85	zinc finger protein 120 [Source:MGI Symbol;Acc:MGI:1345179]
Zbtb10	3.75	4.53	4.7	1.99e-05	0.00469	0.825	1.77	zinc finger and BTB domain containing 10 [Source:MGI Symbol;Acc:MGI:2139883]
Zfp943	4.24	4.97	4.7	2.02e-05	0.00469	0.889	1.85	zinc finger prtoein 943 [Source:MGI Symbol;Acc:MGI:1921920]
Lztfl1	5.6	6.14	4.7	2.03e-05	0.00469	0.708	1.63	leucine zipper transcription factor-like 1 [Source:MGI Symbol;Acc:MGI:1934860]
Cadm2	6.6	7.52	4.69	2.07e-05	0.00469	0.907	1.88	cell adhesion molecule 2 [Source:MGI Symbol;Acc:MGI:2442722]
Dennd1b	4.35	4.95	4.69	2.1e-05	0.00469	0.775	1.71	DENN/MADD domain containing 1B [Source:MGI Symbol;Acc:MGI:2447812]
Kdm5a	5.82	6.5	4.69	2.12e-05	0.00469	0.747	1.68	lysine (K)-specific demethylase 5A [Source:MGI Symbol;Acc:MGI:2136980]
Zbtb26	3.26	4.13	4.68	2.12e-05	0.00469	1.08	2.12	zinc finger and BTB domain containing 26 [Source:MGI Symbol;Acc:MGI:2444402]
Gm28498	2.41	1.42	-4.68	2.13e-05	0.00469	-1.32	-2.5	predicted gene 28498 [Source:MGI Symbol;Acc:MGI:5579204]
Safb2	7.09	6.51	-4.68	2.17e-05	0.00469	-0.609	-1.53	scaffold attachment factor B2 [Source:MGI Symbol;Acc:MGI:2146808]
Hdac7	5.82	5.25	-4.68	2.19e-05	0.00469	-0.623	-1.54	histone deacetylase 7 [Source:MGI Symbol;Acc:MGI:1891835]
Rif1	5.28	6.14	4.67	2.27e-05	0.00469	0.932	1.91	Rap1 interacting factor 1 homolog (yeast) [Source:MGI Symbol;Acc:MGI:1098622]
Cacnb4	5.72	6.67	4.65	2.4e-05	0.00469	0.965	1.95	calcium channel, voltage-dependent, beta 4 subunit [Source:MGI Symbol;Acc:MGI:103301]
Fam126b	6.32	7.24	4.65	2.41e-05	0.00469	1.06	2.08	family with sequence similarity 126, member B [Source:MGI Symbol;Acc:MGI:1098784]
Xpo4	2.89	4.29	4.65	2.42e-05	0.00469	1.32	2.5	exportin 4 [Source:MGI Symbol;Acc:MGI:1888526]
Itgav	6.54	7.41	4.65	2.42e-05	0.00469	0.897	1.86	integrin alpha V [Source:MGI Symbol;Acc:MGI:96608]
Map2k6	2.59	3.37	4.64	2.44e-05	0.00469	0.986	1.98	mitogen-activated protein kinase kinase 6 [Source:MGI Symbol;Acc:MGI:1346870]
Skil	5.95	6.55	4.64	2.51e-05	0.00469	0.832	1.78	SKI-like [Source:MGI Symbol;Acc:MGI:106203]
Arrdc3	6.31	7.03	4.63	2.52e-05	0.00469	0.82	1.77	arrestin domain containing 3 [Source:MGI Symbol;Acc:MGI:2145242]
Mib1	7.08	8	4.63	2.52e-05	0.00469	0.909	1.88	mindbomb homolog 1 (Drosophila) [Source:MGI Symbol;Acc:MGI:2443157]
Fryl	6.4	7.07	4.63	2.52e-05	0.00469	0.691	1.61	furry homolog-like (Drosophila) [Source:MGI Symbol;Acc:MGI:1919563]
Hmgcr	7.17	7.72	4.63	2.52e-05	0.00469	0.601	1.52	3-hydroxy-3-methylglutaryl-Coenzyme A reductase [Source:MGI Symbol;Acc:MGI:96159]
Col9a2	3.75	2.81	-4.63	2.53e-05	0.00469	-1.05	-2.07	collagen, type IX, alpha 2 [Source:MGI Symbol;Acc:MGI:88466]
Akap6	7.6	8.3	4.63	2.55e-05	0.00469	0.673	1.59	A kinase (PRKA) anchor protein 6 [Source:MGI Symbol;Acc:MGI:3050566]
Aff2	3.13	4.73	4.63	2.57e-05	0.00469	1.44	2.71	AF4/FMR2 family, member 2 [Source:MGI Symbol;Acc:MGI:1202294]
Bdp1	4.91	5.69	4.63	2.57e-05	0.00469	0.953	1.94	B double prime 1, subunit of RNA polymerase III transcription initiation factor IIIB [Source:MGI Symbol;Acc:MGI:1347077]
Psd3	7.38	8.3	4.63	2.59e-05	0.00469	0.951	1.93	pleckstrin and Sec7 domain containing 3 [Source:MGI Symbol;Acc:MGI:1918215]
Fam166b	0.772	-1.55	-4.63	2.59e-05	0.00469	-2.71	-6.55	family with sequence similarity 166, member B [Source:MGI Symbol;Acc:MGI:2445194]
Nrip2	5.6	5.06	-4.63	2.6e-05	0.00469	-0.667	-1.59	nuclear receptor interacting protein 2 [Source:MGI Symbol;Acc:MGI:1891884]
Wdr33	5.98	5.58	-4.62	2.62e-05	0.00469	-0.47	-1.39	WD repeat domain 33 [Source:MGI Symbol;Acc:MGI:1921570]
Sesn3	4.03	5.77	4.61	2.74e-05	0.00469	1.75	3.37	sestrin 3 [Source:MGI Symbol;Acc:MGI:1922997]
NA	4.69	4.07	-4.61	2.77e-05	0.00469	-0.719	-1.65	NA
Hsd17b7	3.9	4.7	4.61	2.77e-05	0.00469	0.867	1.82	hydroxysteroid (17-beta) dehydrogenase 7 [Source:MGI Symbol;Acc:MGI:1330808]
Gabrb2	5.06	6.74	4.6	2.81e-05	0.00469	1.52	2.87	gamma-aminobutyric acid (GABA) A receptor, subunit beta 2 [Source:MGI Symbol;Acc:MGI:95620]
Srrm4os	1.32	3.01	4.6	2.84e-05	0.00469	2.02	4.06	serine/arginine repetitive matrix 4, opposite strand [Source:MGI Symbol;Acc:MGI:1924048]
Gm37776	-2.7	0.969	4.6	2.85e-05	0.00469	3.94	15.4	predicted gene, 37776 [Source:MGI Symbol;Acc:MGI:5611004]
Timm44	5.94	5.47	-4.6	2.88e-05	0.00469	-0.524	-1.44	translocase of inner mitochondrial membrane 44 [Source:MGI Symbol;Acc:MGI:1343262]
Vax1	2.35	-0.47	-4.59	2.93e-05	0.00469	-2.72	-6.6	ventral anterior homeobox 1 [Source:MGI Symbol;Acc:MGI:1277163]
Zyg11b	7.84	8.65	4.58	3.01e-05	0.00469	0.859	1.81	zyg-ll family member B, cell cycle regulator [Source:MGI Symbol;Acc:MGI:2685277]
Nrde2	4.22	3.58	-4.58	3.05e-05	0.00469	-0.88	-1.84	nrde-2 necessary for RNA interference, domain containing [Source:MGI Symbol;Acc:MGI:2670969]
Utp14b	4.48	5.39	4.57	3.11e-05	0.00469	0.958	1.94	UTP14, U3 small nucleolar ribonucleoprotein, homolog B (yeast) [Source:MGI Symbol;Acc:MGI:2445092]
Acin1	7.28	6.87	-4.57	3.12e-05	0.00469	-0.467	-1.38	apoptotic chromatin condensation inducer 1 [Source:MGI Symbol;Acc:MGI:1891824]
Hook2	4.89	4.29	-4.57	3.13e-05	0.00469	-0.734	-1.66	hook homolog 2 (Drosophila) [Source:MGI Symbol;Acc:MGI:2181664]
Lmbrd2	3.68	5.68	4.57	3.15e-05	0.00469	2.09	4.25	LMBR1 domain containing 2 [Source:MGI Symbol;Acc:MGI:2444173]
Osbpl8	6.13	7.26	4.57	3.18e-05	0.00469	1.16	2.24	oxysterol binding protein-like 8 [Source:MGI Symbol;Acc:MGI:2443807]
Pofut2	5.1	4.46	-4.57	3.18e-05	0.00469	-0.846	-1.8	protein O-fucosyltransferase 2 [Source:MGI Symbol;Acc:MGI:1916863]
Kif17	5.07	4.37	-4.56	3.21e-05	0.00469	-0.806	-1.75	kinesin family member 17 [Source:MGI Symbol;Acc:MGI:1098229]
Luzp1	6.15	6.62	4.56	3.22e-05	0.00469	0.57	1.48	leucine zipper protein 1 [Source:MGI Symbol;Acc:MGI:107629]
Pikfyve	5.75	6.57	4.56	3.23e-05	0.00469	0.828	1.78	phosphoinositide kinase, FYVE finger containing [Source:MGI Symbol;Acc:MGI:1335106]
Oxsm	3.9	4.45	4.56	3.28e-05	0.00469	0.691	1.61	3-oxoacyl-ACP synthase, mitochondrial [Source:MGI Symbol;Acc:MGI:1918397]
Izumo4	4.93	4.24	-4.56	3.28e-05	0.00469	-0.846	-1.8	IZUMO family member 4 [Source:MGI Symbol;Acc:MGI:1918814]
Kmt2c	7.06	7.79	4.56	3.3e-05	0.00469	0.782	1.72	lysine (K)-specific methyltransferase 2C [Source:MGI Symbol;Acc:MGI:2444959]
Pbrm1	5.86	6.55	4.55	3.32e-05	0.00469	0.844	1.8	polybromo 1 [Source:MGI Symbol;Acc:MGI:1923998]
Mesdc1	4.66	4	-4.55	3.33e-05	0.00469	-0.832	-1.78	mesoderm development candidate 1 [Source:MGI Symbol;Acc:MGI:1891420]
A330015K06Rik	1.61	2.92	4.55	3.35e-05	0.00469	1.23	2.35	RIKEN cDNA A330015K06 gene [Source:MGI Symbol;Acc:MGI:2443553]
Senp5	4.35	5.2	4.55	3.39e-05	0.00469	0.839	1.79	SUMO/sentrin specific peptidase 5 [Source:MGI Symbol;Acc:MGI:2443596]
Fmr1	5.38	6.19	4.55	3.4e-05	0.00469	1.02	2.03	fragile X mental retardation syndrome 1 [Source:MGI Symbol;Acc:MGI:95564]
Aqp4	5.95	6.81	4.54	3.41e-05	0.00469	0.8	1.74	aquaporin 4 [Source:MGI Symbol;Acc:MGI:107387]
Zfand4	3.34	4.06	4.54	3.42e-05	0.00469	0.83	1.78	zinc finger, AN1-type domain 4 [Source:MGI Symbol;Acc:MGI:1914742]
Zfp729a	2.82	3.56	4.54	3.43e-05	0.00469	0.827	1.77	zinc finger protein 729a [Source:MGI Symbol;Acc:MGI:3036250]
P3h3	5.51	4.9	-4.54	3.43e-05	0.00469	-0.687	-1.61	prolyl 3-hydroxylase 3 [Source:MGI Symbol;Acc:MGI:1315208]
Fbrsl1	5.32	4.87	-4.54	3.46e-05	0.00469	-0.605	-1.52	fibrosin-like 1 [Source:MGI Symbol;Acc:MGI:1920907]
Kdm6b	5.77	5.36	-4.53	3.55e-05	0.00472	-0.584	-1.5	KDM1 lysine (K)-specific demethylase 6B [Source:MGI Symbol;Acc:MGI:2448492]
Wwp1	5.31	6.15	4.53	3.6e-05	0.00472	0.863	1.82	WW domain containing E3 ubiquitin protein ligase 1 [Source:MGI Symbol;Acc:MGI:1861728]
Frs3	4.43	3.65	-4.53	3.6e-05	0.00472	-1.07	-2.09	fibroblast growth factor receptor substrate 3 [Source:MGI Symbol;Acc:MGI:2135965]
Foxred1	5.84	5.46	-4.53	3.61e-05	0.00472	-0.469	-1.38	FAD-dependent oxidoreductase domain containing 1 [Source:MGI Symbol;Acc:MGI:2446262]
Slc1a2	10.5	11.3	4.53	3.62e-05	0.00472	0.859	1.81	solute carrier family 1 (glial high affinity glutamate transporter), member 2 [Source:MGI Symbol;Acc:MGI:101931]
Klhl11	3.3	5.3	4.52	3.67e-05	0.00475	2.16	4.47	kelch-like 11 [Source:MGI Symbol;Acc:MGI:2388648]
Arhgap5	5.35	6.59	4.52	3.69e-05	0.00475	1.24	2.36	Rho GTPase activating protein 5 [Source:MGI Symbol;Acc:MGI:1332637]
Gpsm1	6.42	5.89	-4.52	3.74e-05	0.00478	-0.647	-1.57	G-protein signalling modulator 1 (AGS3-like, C. elegans) [Source:MGI Symbol;Acc:MGI:1915089]
Zfp518a	3.83	4.67	4.51	3.85e-05	0.00488	0.993	1.99	zinc finger protein 518A [Source:MGI Symbol;Acc:MGI:1919922]
Map3k2	5.61	6.36	4.51	3.89e-05	0.00489	0.938	1.92	mitogen-activated protein kinase kinase kinase 2 [Source:MGI Symbol;Acc:MGI:1346873]
Eri3	6.24	5.74	-4.5	3.91e-05	0.00489	-0.63	-1.55	exoribonuclease 3 [Source:MGI Symbol;Acc:MGI:2153887]
Dbn1	7.19	6.66	-4.5	4.01e-05	0.00498	-0.563	-1.48	drebrin 1 [Source:MGI Symbol;Acc:MGI:1931838]
Ttc37	4.17	5.02	4.49	4.06e-05	0.00498	0.75	1.68	tetratricopeptide repeat domain 37 [Source:MGI Symbol;Acc:MGI:2679923]
Mkln1	7.48	8.03	4.49	4.07e-05	0.00498	0.641	1.56	muskelin 1, intracellular mediator containing kelch motifs [Source:MGI Symbol;Acc:MGI:1351638]
Edc4	6.49	6.04	-4.49	4.16e-05	0.00498	-0.488	-1.4	enhancer of mRNA decapping 4 [Source:MGI Symbol;Acc:MGI:2446249]
Qk	8.12	8.92	4.48	4.22e-05	0.00498	0.834	1.78	quaking [Source:MGI Symbol;Acc:MGI:97837]
Ttbk2	6.5	7.33	4.48	4.28e-05	0.00498	0.871	1.83	tau tubulin kinase 2 [Source:MGI Symbol;Acc:MGI:2155779]
Trip6	3.31	2.44	-4.48	4.3e-05	0.00498	-1.04	-2.06	thyroid hormone receptor interactor 6 [Source:MGI Symbol;Acc:MGI:1343458]
Brd2	7.1	6.66	-4.48	4.31e-05	0.00498	-0.527	-1.44	bromodomain containing 2 [Source:MGI Symbol;Acc:MGI:99495]
Enpp4	5.19	5.75	4.47	4.37e-05	0.00498	0.552	1.47	ectonucleotide pyrophosphatase/phosphodiesterase 4 [Source:MGI Symbol;Acc:MGI:2682634]
Crebrf	6.5	7.29	4.47	4.38e-05	0.00498	0.811	1.75	CREB3 regulatory factor [Source:MGI Symbol;Acc:MGI:1924378]
Pgm2l1	6.89	7.77	4.47	4.39e-05	0.00498	0.988	1.98	phosphoglucomutase 2-like 1 [Source:MGI Symbol;Acc:MGI:1918224]
Ank3	8.8	9.23	4.47	4.4e-05	0.00498	0.505	1.42	ankyrin 3, epithelial [Source:MGI Symbol;Acc:MGI:88026]
Cpm	3.75	4.58	4.47	4.43e-05	0.00498	0.797	1.74	carboxypeptidase M [Source:MGI Symbol;Acc:MGI:1917824]
Pick1	5.57	4.96	-4.47	4.45e-05	0.00498	-0.718	-1.65	protein interacting with C kinase 1 [Source:MGI Symbol;Acc:MGI:894645]
Slc35e2	6.21	6.82	4.47	4.45e-05	0.00498	0.793	1.73	solute carrier family 35, member E2 [Source:MGI Symbol;Acc:MGI:2444240]
Kctd18	4.22	4.74	4.46	4.48e-05	0.00498	0.607	1.52	potassium channel tetramerisation domain containing 18 [Source:MGI Symbol;Acc:MGI:3603813]
Chd9	5.77	6.57	4.46	4.48e-05	0.00498	0.69	1.61	chromodomain helicase DNA binding protein 9 [Source:MGI Symbol;Acc:MGI:1924001]
Spag9	8.71	9.46	4.46	4.49e-05	0.00498	0.772	1.71	sperm associated antigen 9 [Source:MGI Symbol;Acc:MGI:1918084]
Malat1	9.23	10.3	4.45	4.64e-05	0.00504	1.65	3.14	metastasis associated lung adenocarcinoma transcript 1 (non-coding RNA) [Source:MGI Symbol;Acc:MGI:1919539]
Klhl24	5.54	6.36	4.45	4.66e-05	0.00504	0.795	1.74	kelch-like 24 [Source:MGI Symbol;Acc:MGI:1923035]
Gpatch1	5.4	4.93	-4.45	4.68e-05	0.00504	-0.448	-1.36	G patch domain containing 1 [Source:MGI Symbol;Acc:MGI:1914721]
Mdga2	5.41	5.94	4.45	4.71e-05	0.00504	0.788	1.73	MAM domain containing glycosylphosphatidylinositol anchor 2 [Source:MGI Symbol;Acc:MGI:2444706]
Ubr3	7.47	8.24	4.45	4.74e-05	0.00504	0.759	1.69	ubiquitin protein ligase E3 component n-recognin 3 [Source:MGI Symbol;Acc:MGI:1861100]
Xpo1	6.74	7.51	4.45	4.75e-05	0.00504	0.772	1.71	exportin 1, CRM1 homolog (yeast) [Source:MGI Symbol;Acc:MGI:2144013]
Creb1	5.5	6.03	4.45	4.75e-05	0.00504	0.705	1.63	cAMP responsive element binding protein 1 [Source:MGI Symbol;Acc:MGI:88494]
Cpd	6.11	6.71	4.44	4.79e-05	0.00504	0.59	1.5	carboxypeptidase D [Source:MGI Symbol;Acc:MGI:107265]
Purb	8.56	9.32	4.44	4.8e-05	0.00504	0.89	1.85	purine rich element binding protein B [Source:MGI Symbol;Acc:MGI:1338779]
Cpt1c	6.69	6.21	-4.44	4.83e-05	0.00504	-0.544	-1.46	carnitine palmitoyltransferase 1c [Source:MGI Symbol;Acc:MGI:2446526]
Arl5b	4.59	5.46	4.44	4.89e-05	0.00506	0.934	1.91	ADP-ribosylation factor-like 5B [Source:MGI Symbol;Acc:MGI:1923119]
Sema4c	4.36	3.73	-4.44	4.91e-05	0.00506	-0.751	-1.68	sema domain, immunoglobulin domain (Ig), transmembrane domain (TM) and short cytoplasmic domain, (semaphorin) 4C [Source:MGI Symbol;Acc:MGI:109252]
Zdhhc1	5.67	5.08	-4.43	4.96e-05	0.00506	-0.689	-1.61	zinc finger, DHHC domain containing 1 [Source:MGI Symbol;Acc:MGI:1918046]
Whamm	4.59	4.04	-4.43	5e-05	0.00506	-0.723	-1.65	WAS protein homolog associated with actin, golgi membranes and microtubules [Source:MGI Symbol;Acc:MGI:2142282]
Slc25a10	3.43	2.67	-4.43	5e-05	0.00506	-1.2	-2.29	solute carrier family 25 (mitochondrial carrier, dicarboxylate transporter), member 10 [Source:MGI Symbol;Acc:MGI:1353497]
Ssbp4	5.94	5.02	-4.43	5.07e-05	0.00506	-1.03	-2.05	single stranded DNA binding protein 4 [Source:MGI Symbol;Acc:MGI:1924150]
Ranbp3	6.66	6.1	-4.43	5.09e-05	0.00506	-0.597	-1.51	RAN binding protein 3 [Source:MGI Symbol;Acc:MGI:1919060]
Ush1c	1.6	-0.175	-4.43	5.1e-05	0.00506	-1.76	-3.38	Usher syndrome 1C [Source:MGI Symbol;Acc:MGI:1919338]
Sf3a2	3.77	3.13	-4.42	5.12e-05	0.00506	-0.857	-1.81	splicing factor 3a, subunit 2 [Source:MGI Symbol;Acc:MGI:104912]
Keap1	5.81	5.28	-4.42	5.2e-05	0.00506	-0.671	-1.59	kelch-like ECH-associated protein 1 [Source:MGI Symbol;Acc:MGI:1858732]
Lppr2	6.29	5.59	-4.42	5.23e-05	0.00506	-0.737	-1.67	lipid phosphate phosphatase-related protein type 2 [Source:MGI Symbol;Acc:MGI:2384575]
Six6	2.82	0.664	-4.42	5.27e-05	0.00506	-1.77	-3.42	sine oculis-related homeobox 6 [Source:MGI Symbol;Acc:MGI:1341840]
Tmem170b	6.25	6.94	4.42	5.28e-05	0.00506	0.717	1.64	transmembrane protein 170B [Source:MGI Symbol;Acc:MGI:3647046]
Rexo1	5.24	4.77	-4.41	5.29e-05	0.00506	-0.697	-1.62	REX1, RNA exonuclease 1 homolog (S. cerevisiae) [Source:MGI Symbol;Acc:MGI:1914182]
Lrfn4	4.79	3.79	-4.41	5.3e-05	0.00506	-1.19	-2.28	leucine rich repeat and fibronectin type III domain containing 4 [Source:MGI Symbol;Acc:MGI:2385612]
Safb	7.11	6.55	-4.41	5.35e-05	0.00506	-0.581	-1.5	scaffold attachment factor B [Source:MGI Symbol;Acc:MGI:2146974]
Itga1	1.28	2.63	4.41	5.36e-05	0.00506	1.39	2.63	integrin alpha 1 [Source:MGI Symbol;Acc:MGI:96599]
Pccb	5.51	5.05	-4.41	5.36e-05	0.00506	-0.641	-1.56	propionyl Coenzyme A carboxylase, beta polypeptide [Source:MGI Symbol;Acc:MGI:1914154]
Cpsf1	5.99	5.54	-4.41	5.41e-05	0.00507	-0.653	-1.57	cleavage and polyadenylation specific factor 1 [Source:MGI Symbol;Acc:MGI:2679722]
A230050P20Rik	6.17	5.53	-4.4	5.54e-05	0.00516	-0.764	-1.7	RIKEN cDNA A230050P20 gene [Source:MGI Symbol;Acc:MGI:2441788]
Atrx	7.3	7.93	4.4	5.57e-05	0.00516	0.713	1.64	alpha thalassemia/mental retardation syndrome X-linked homolog (human) [Source:MGI Symbol;Acc:MGI:103067]
Ptprn	9.7	9.16	-4.4	5.6e-05	0.00516	-0.591	-1.51	protein tyrosine phosphatase, receptor type, N [Source:MGI Symbol;Acc:MGI:102765]
Mapk8	6.13	6.68	4.4	5.64e-05	0.00517	0.619	1.54	mitogen-activated protein kinase 8 [Source:MGI Symbol;Acc:MGI:1346861]
Thap3	4.06	3.28	-4.39	5.71e-05	0.00521	-0.771	-1.71	THAP domain containing, apoptosis associated protein 3 [Source:MGI Symbol;Acc:MGI:1917126]
Ppp1r26	5.16	4.63	-4.39	5.74e-05	0.00521	-0.663	-1.58	protein phosphatase 1, regulatory subunit 26 [Source:MGI Symbol;Acc:MGI:2685193]
Clstn2	6.16	6.87	4.38	5.95e-05	0.00532	0.622	1.54	calsyntenin 2 [Source:MGI Symbol;Acc:MGI:1929897]
Cdkl5	5.82	6.58	4.38	5.98e-05	0.00532	0.972	1.96	cyclin-dependent kinase-like 5 [Source:MGI Symbol;Acc:MGI:1278336]
Trh	5.76	3.88	-4.38	5.98e-05	0.00532	-1.8	-3.49	thyrotropin releasing hormone [Source:MGI Symbol;Acc:MGI:98823]
Tmem132e	4.88	4.25	-4.37	6.04e-05	0.00532	-0.775	-1.71	transmembrane protein 132E [Source:MGI Symbol;Acc:MGI:2685490]
Cmip	9.1	8.65	-4.37	6.04e-05	0.00532	-0.441	-1.36	c-Maf inducing protein [Source:MGI Symbol;Acc:MGI:1921690]
Rc3h1	5.66	6.39	4.37	6.05e-05	0.00532	0.887	1.85	RING CCCH (C3H) domains 1 [Source:MGI Symbol;Acc:MGI:2685397]
Akap8l	7.1	6.71	-4.37	6.06e-05	0.00532	-0.528	-1.44	A kinase (PRKA) anchor protein 8-like [Source:MGI Symbol;Acc:MGI:1860606]
Soat1	5.69	6.19	4.37	6.16e-05	0.00535	0.705	1.63	sterol O-acyltransferase 1 [Source:MGI Symbol;Acc:MGI:104665]
Pcdh11x	5.13	5.97	4.37	6.23e-05	0.00535	1.07	2.1	protocadherin 11 X-linked [Source:MGI Symbol;Acc:MGI:2442849]
Mfsd10	4.2	3.52	-4.37	6.23e-05	0.00535	-0.878	-1.84	major facilitator superfamily domain containing 10 [Source:MGI Symbol;Acc:MGI:1915544]
Plcl1	6.12	6.81	4.36	6.24e-05	0.00535	0.683	1.61	phospholipase C-like 1 [Source:MGI Symbol;Acc:MGI:3036262]
Myg1	5.53	4.98	-4.36	6.25e-05	0.00535	-0.57	-1.48	melanocyte proliferating gene 1 [Source:MGI Symbol;Acc:MGI:1929864]
Surf4	5.81	5.36	-4.36	6.3e-05	0.00535	-0.535	-1.45	surfeit gene 4 [Source:MGI Symbol;Acc:MGI:98445]
Syt5	7.25	6.56	-4.36	6.34e-05	0.00535	-0.725	-1.65	synaptotagmin V [Source:MGI Symbol;Acc:MGI:1926368]
B3galt1	4.89	5.63	4.36	6.43e-05	0.00535	0.792	1.73	UDP-Gal:betaGlcNAc beta 1,3-galactosyltransferase, polypeptide 1 [Source:MGI Symbol;Acc:MGI:1349403]
Qrfp	2.05	0.232	-4.35	6.45e-05	0.00535	-1.69	-3.22	pyroglutamylated RFamide peptide [Source:MGI Symbol;Acc:MGI:3630329]
Trpm7	5.51	6.36	4.35	6.47e-05	0.00535	0.814	1.76	transient receptor potential cation channel, subfamily M, member 7 [Source:MGI Symbol;Acc:MGI:1929996]
Yes1	3.7	4.47	4.35	6.53e-05	0.00535	0.933	1.91	Yamaguchi sarcoma viral (v-yes) oncogene homolog 1 [Source:MGI Symbol;Acc:MGI:99147]
Gm38104	0.0599	2.41	4.35	6.54e-05	0.00535	2.57	5.92	predicted gene, 38104 [Source:MGI Symbol;Acc:MGI:5611332]
Rbck1	6.37	5.68	-4.35	6.55e-05	0.00535	-0.804	-1.75	RanBP-type and C3HC4-type zinc finger containing 1 [Source:MGI Symbol;Acc:MGI:1344372]
Fnip1	5.25	5.88	4.35	6.56e-05	0.00535	0.788	1.73	folliculin interacting protein 1 [Source:MGI Symbol;Acc:MGI:2444668]
Cltc	9.73	10.2	4.35	6.57e-05	0.00535	0.522	1.44	clathrin, heavy polypeptide (Hc) [Source:MGI Symbol;Acc:MGI:2388633]
Cdh19	3.82	4.61	4.35	6.59e-05	0.00535	0.752	1.68	cadherin 19, type 2 [Source:MGI Symbol;Acc:MGI:3588198]
Robo2	5.02	5.93	4.35	6.62e-05	0.00536	0.907	1.88	roundabout homolog 2 (Drosophila) [Source:MGI Symbol;Acc:MGI:1890110]
Mum1	6.11	5.78	-4.34	6.71e-05	0.00537	-0.469	-1.38	melanoma associated antigen (mutated) 1 [Source:MGI Symbol;Acc:MGI:1915364]
4933403O08Rik	-1.45	0.826	4.34	6.75e-05	0.00537	2.18	4.53	RIKEN cDNA 4933403O08 gene [Source:MGI Symbol;Acc:MGI:1918280]
Gtpbp6	3.39	2.58	-4.34	6.75e-05	0.00537	-1.28	-2.43	GTP binding protein 6 (putative) [Source:MGI Symbol;Acc:MGI:1306825]
Maged1	9.72	9.17	-4.34	6.76e-05	0.00537	-0.625	-1.54	melanoma antigen, family D, 1 [Source:MGI Symbol;Acc:MGI:1930187]
Sp1	4.85	5.48	4.34	6.87e-05	0.00543	0.635	1.55	trans-acting transcription factor 1 [Source:MGI Symbol;Acc:MGI:98372]
Myo1h	1.85	0.723	-4.33	6.95e-05	0.00546	-1.21	-2.31	myosin 1H [Source:MGI Symbol;Acc:MGI:1914674]
Tubb2b	5.49	4.75	-4.33	7e-05	0.00546	-0.885	-1.85	tubulin, beta 2B class IIB [Source:MGI Symbol;Acc:MGI:1920960]
Dcaf17	3.68	4.42	4.33	7.04e-05	0.00546	0.779	1.72	DDB1 and CUL4 associated factor 17 [Source:MGI Symbol;Acc:MGI:1923013]
Abca1	5.77	6.55	4.33	7.06e-05	0.00546	0.739	1.67	ATP-binding cassette, sub-family A (ABC1), member 1 [Source:MGI Symbol;Acc:MGI:99607]
Osgepl1	3.35	3.99	4.33	7.06e-05	0.00546	0.837	1.79	O-sialoglycoprotein endopeptidase-like 1 [Source:MGI Symbol;Acc:MGI:1919335]
Ppip5k2	5.15	5.99	4.33	7.09e-05	0.00546	0.774	1.71	diphosphoinositol pentakisphosphate kinase 2 [Source:MGI Symbol;Acc:MGI:2142810]
Fbxo47	-0.135	1.27	4.32	7.15e-05	0.00547	1.83	3.56	F-box protein 47 [Source:MGI Symbol;Acc:MGI:1920223]
Ryr3	5.28	6.57	4.32	7.17e-05	0.00547	1.12	2.17	ryanodine receptor 3 [Source:MGI Symbol;Acc:MGI:99684]
Zfp414	3.61	2.77	-4.32	7.27e-05	0.00552	-1.07	-2.1	zinc finger protein 414 [Source:MGI Symbol;Acc:MGI:1915641]
BC022687	3.92	3.12	-4.32	7.34e-05	0.00553	-0.823	-1.77	cDNA sequence BC022687 [Source:MGI Symbol;Acc:MGI:2443738]
Ddost	6.31	5.77	-4.32	7.35e-05	0.00553	-0.648	-1.57	dolichyl-di-phosphooligosaccharide-protein glycotransferase [Source:MGI Symbol;Acc:MGI:1194508]
Ankrd54	4.79	4.17	-4.31	7.49e-05	0.00561	-0.651	-1.57	ankyrin repeat domain 54 [Source:MGI Symbol;Acc:MGI:2444209]
Hecw1	5.65	6.43	4.31	7.51e-05	0.00561	0.969	1.96	HECT, C2 and WW domain containing E3 ubiquitin protein ligase 1 [Source:MGI Symbol;Acc:MGI:2444115]
Spata24	1.76	0.704	-4.31	7.57e-05	0.00562	-1.27	-2.41	spermatogenesis associated 24 [Source:MGI Symbol;Acc:MGI:1918492]
Nrxn1	7.69	8.29	4.3	7.69e-05	0.00562	0.669	1.59	neurexin I [Source:MGI Symbol;Acc:MGI:1096391]
Exosc2	4.03	3.42	-4.3	7.76e-05	0.00562	-0.693	-1.62	exosome component 2 [Source:MGI Symbol;Acc:MGI:2385133]
Zfp523	5.58	4.92	-4.3	7.76e-05	0.00562	-0.762	-1.7	zinc finger protein 523 [Source:MGI Symbol;Acc:MGI:2687278]
Spopl	3.67	4.33	4.3	7.78e-05	0.00562	0.874	1.83	speckle-type POZ protein-like [Source:MGI Symbol;Acc:MGI:1924107]
Atl3	5.28	5.92	4.3	7.82e-05	0.00562	0.59	1.51	atlastin GTPase 3 [Source:MGI Symbol;Acc:MGI:1924270]
Myo6	6.79	7.38	4.3	7.83e-05	0.00562	0.627	1.54	myosin VI [Source:MGI Symbol;Acc:MGI:104785]
Prkd3	4.12	4.7	4.3	7.84e-05	0.00562	0.627	1.54	protein kinase D3 [Source:MGI Symbol;Acc:MGI:1922542]
Pvt1	2.5	3.33	4.29	7.88e-05	0.00562	0.848	1.8	plasmacytoma variant translocation 1 [Source:MGI Symbol;Acc:MGI:97824]
Dmxl1	5.36	6.19	4.29	7.88e-05	0.00562	0.88	1.84	Dmx-like 1 [Source:MGI Symbol;Acc:MGI:2443926]
Ncam2	4.09	5.43	4.29	7.89e-05	0.00562	1.34	2.53	neural cell adhesion molecule 2 [Source:MGI Symbol;Acc:MGI:97282]
Zfp300	1.43	2.51	4.29	7.9e-05	0.00562	1.15	2.23	zinc finger protein 300 [Source:MGI Symbol;Acc:MGI:3045326]
Ppp2r3a	5.99	6.59	4.29	7.96e-05	0.00562	0.613	1.53	protein phosphatase 2, regulatory subunit B'', alpha [Source:MGI Symbol;Acc:MGI:2442104]
Drc1	4.4	3.64	-4.29	7.97e-05	0.00562	-0.841	-1.79	dynein regulatory complex subunit 1 [Source:MGI Symbol;Acc:MGI:2685906]
Elmod2	5.03	5.76	4.29	8.01e-05	0.00562	0.716	1.64	ELMO/CED-12 domain containing 2 [Source:MGI Symbol;Acc:MGI:2445165]
Gm10654	3.34	2.55	-4.29	8.04e-05	0.00563	-0.774	-1.71	predicted gene 10654 [Source:MGI Symbol;Acc:MGI:3643366]
Gm4491	0.583	1.72	4.28	8.23e-05	0.00566	1.4	2.65	predicted gene 4491 [Source:MGI Symbol;Acc:MGI:3782676]
Snd1	6.49	5.87	-4.28	8.24e-05	0.00566	-0.678	-1.6	staphylococcal nuclease and tudor domain containing 1 [Source:MGI Symbol;Acc:MGI:1929266]
Ak3	6.9	7.3	4.28	8.31e-05	0.00566	0.369	1.29	adenylate kinase 3 [Source:MGI Symbol;Acc:MGI:1860835]
Chml	3.69	4.74	4.28	8.35e-05	0.00566	0.901	1.87	choroideremia-like [Source:MGI Symbol;Acc:MGI:101913]
Mecp2	7.42	8.06	4.28	8.36e-05	0.00566	0.745	1.68	methyl CpG binding protein 2 [Source:MGI Symbol;Acc:MGI:99918]
Ube4a	6.76	7.33	4.28	8.36e-05	0.00566	0.588	1.5	ubiquitination factor E4A [Source:MGI Symbol;Acc:MGI:2154580]
Crtc2	4.53	4	-4.28	8.37e-05	0.00566	-0.657	-1.58	CREB regulated transcription coactivator 2 [Source:MGI Symbol;Acc:MGI:1921593]
Lysmd3	3.33	4.34	4.28	8.38e-05	0.00566	1.15	2.22	LysM, putative peptidoglycan-binding, domain containing 3 [Source:MGI Symbol;Acc:MGI:1915906]
Adck4	5.18	4.37	-4.27	8.42e-05	0.00566	-0.839	-1.79	aarF domain containing kinase 4 [Source:MGI Symbol;Acc:MGI:1924139]
Dcbld2	4.6	5.19	4.27	8.45e-05	0.00566	0.534	1.45	discoidin, CUB and LCCL domain containing 2 [Source:MGI Symbol;Acc:MGI:1920629]
Tatdn3	4.53	5.05	4.27	8.58e-05	0.00566	0.556	1.47	TatD DNase domain containing 3 [Source:MGI Symbol;Acc:MGI:1916222]
Vldlr	6.63	7.12	4.27	8.59e-05	0.00566	0.528	1.44	very low density lipoprotein receptor [Source:MGI Symbol;Acc:MGI:98935]
Sf3a1	5.74	5.36	-4.26	8.75e-05	0.00566	-0.455	-1.37	splicing factor 3a, subunit 1 [Source:MGI Symbol;Acc:MGI:1914715]
Lppr3	6.75	6.04	-4.26	8.75e-05	0.00566	-0.797	-1.74	lipid phosphate phosphatase-related protein type 3 [Source:MGI Symbol;Acc:MGI:2388640]
Zdhhc21	5.71	6.25	4.26	8.81e-05	0.00566	0.618	1.53	zinc finger, DHHC domain containing 21 [Source:MGI Symbol;Acc:MGI:1915518]
Eif5a2	6.35	7.11	4.26	8.81e-05	0.00566	0.788	1.73	eukaryotic translation initiation factor 5A2 [Source:MGI Symbol;Acc:MGI:1933735]
Sergef	4.72	4.03	-4.26	8.83e-05	0.00566	-0.713	-1.64	secretion regulating guanine nucleotide exchange factor [Source:MGI Symbol;Acc:MGI:1351630]
Rpusd4	2.53	1.49	-4.26	8.89e-05	0.00566	-1.03	-2.04	RNA pseudouridylate synthase domain containing 4 [Source:MGI Symbol;Acc:MGI:1919239]
Hdgf	7.13	6.58	-4.26	8.9e-05	0.00566	-0.516	-1.43	hepatoma-derived growth factor [Source:MGI Symbol;Acc:MGI:1194494]
Alkbh8	3.45	4.6	4.26	8.91e-05	0.00566	1.2	2.3	alkB, alkylation repair homolog 8 (E. coli) [Source:MGI Symbol;Acc:MGI:1914917]
Asb6	4.23	3.58	-4.26	8.92e-05	0.00566	-0.823	-1.77	ankyrin repeat and SOCS box-containing 6 [Source:MGI Symbol;Acc:MGI:1919573]
Ppm1k	6.4	6.9	4.26	8.93e-05	0.00566	0.603	1.52	protein phosphatase 1K (PP2C domain containing) [Source:MGI Symbol;Acc:MGI:2442111]
Btbd2	5.82	5.2	-4.26	8.93e-05	0.00566	-0.823	-1.77	BTB (POZ) domain containing 2 [Source:MGI Symbol;Acc:MGI:1933831]
Mob1b	4.78	5.61	4.25	9.04e-05	0.00566	0.969	1.96	MOB kinase activator 1B [Source:MGI Symbol;Acc:MGI:1915723]
Kcnma1	3.71	5.33	4.25	9.09e-05	0.00566	1.74	3.35	potassium large conductance calcium-activated channel, subfamily M, alpha member 1 [Source:MGI Symbol;Acc:MGI:99923]
Zfp771	3.44	2.58	-4.25	9.11e-05	0.00566	-1.16	-2.24	zinc finger protein 771 [Source:MGI Symbol;Acc:MGI:2442050]
Msmo1	6.31	6.78	4.25	9.18e-05	0.00566	0.612	1.53	methylsterol monoxygenase 1 [Source:MGI Symbol;Acc:MGI:1913484]
Ergic3	6.99	6.32	-4.25	9.18e-05	0.00566	-0.79	-1.73	ERGIC and golgi 3 [Source:MGI Symbol;Acc:MGI:1913616]
Epm2aip1	8.14	8.86	4.25	9.2e-05	0.00566	0.761	1.69	EPM2A (laforin) interacting protein 1 [Source:MGI Symbol;Acc:MGI:1925031]
Gm166	2.24	1.45	-4.25	9.21e-05	0.00566	-1.18	-2.27	predicted gene 166 [Source:MGI Symbol;Acc:MGI:2685012]
Cep135	3.94	4.63	4.25	9.22e-05	0.00566	0.707	1.63	centrosomal protein 135 [Source:MGI Symbol;Acc:MGI:2681869]
Gm16485	3.19	4.06	4.25	9.22e-05	0.00566	0.923	1.9	predicted gene 16485 [Source:MGI Symbol;Acc:MGI:3642771]
Abca9	2.81	3.7	4.25	9.26e-05	0.00566	0.876	1.84	ATP-binding cassette, sub-family A (ABC1), member 9 [Source:MGI Symbol;Acc:MGI:2386796]
Ucp3	3.39	2.79	-4.24	9.27e-05	0.00566	-0.795	-1.74	uncoupling protein 3 (mitochondrial, proton carrier) [Source:MGI Symbol;Acc:MGI:1099787]
Eif2b2	4.69	4.07	-4.24	9.31e-05	0.00566	-0.824	-1.77	eukaryotic translation initiation factor 2B, subunit 2 beta [Source:MGI Symbol;Acc:MGI:2145118]
Akt1s1	4.44	3.8	-4.24	9.31e-05	0.00566	-0.856	-1.81	AKT1 substrate 1 (proline-rich) [Source:MGI Symbol;Acc:MGI:1914855]
Sema6c	3.93	3.29	-4.24	9.32e-05	0.00566	-0.762	-1.7	sema domain, transmembrane domain (TM), and cytoplasmic domain, (semaphorin) 6C [Source:MGI Symbol;Acc:MGI:1338032]
Stk32c	6.59	5.88	-4.24	9.38e-05	0.00566	-0.708	-1.63	serine/threonine kinase 32C [Source:MGI Symbol;Acc:MGI:2385336]
Zfp169	3.56	4.36	4.24	9.38e-05	0.00566	0.951	1.93	zinc finger protein 169 [Source:MGI Symbol;Acc:MGI:1915161]
Pggt1b	2.14	3.28	4.24	9.39e-05	0.00566	1.13	2.19	protein geranylgeranyltransferase type I, beta subunit [Source:MGI Symbol;Acc:MGI:1917514]
Gpatch4	4.23	3.3	-4.24	9.46e-05	0.00566	-0.915	-1.89	G patch domain containing 4 [Source:MGI Symbol;Acc:MGI:1913864]
Eps15l1	5.35	4.96	-4.24	9.48e-05	0.00566	-0.558	-1.47	epidermal growth factor receptor pathway substrate 15-like 1 [Source:MGI Symbol;Acc:MGI:104582]
Zcchc2	4.91	5.54	4.24	9.48e-05	0.00566	0.633	1.55	zinc finger, CCHC domain containing 2 [Source:MGI Symbol;Acc:MGI:2444114]
Ddx26b	6.13	6.74	4.24	9.51e-05	0.00566	0.577	1.49	DEAD/H (Asp-Glu-Ala-Asp/His) box polypeptide 26B [Source:MGI Symbol;Acc:MGI:2442593]
Tenm1	5.28	6.38	4.24	9.58e-05	0.00568	1.17	2.25	teneurin transmembrane protein 1 [Source:MGI Symbol;Acc:MGI:1345185]
Mbd6	5.93	5.46	-4.23	9.6e-05	0.00568	-0.717	-1.64	methyl-CpG binding domain protein 6 [Source:MGI Symbol;Acc:MGI:106378]
Rora	5.95	6.78	4.23	9.68e-05	0.00571	1.04	2.06	RAR-related orphan receptor alpha [Source:MGI Symbol;Acc:MGI:104661]
Med13	6.25	6.99	4.23	9.73e-05	0.00572	0.879	1.84	mediator complex subunit 13 [Source:MGI Symbol;Acc:MGI:3029632]
Pcdh9	6.75	7.37	4.23	9.77e-05	0.00572	0.68	1.6	protocadherin 9 [Source:MGI Symbol;Acc:MGI:1306801]
Zbtb38	5.99	6.51	4.22	9.93e-05	0.00579	0.65	1.57	zinc finger and BTB domain containing 38 [Source:MGI Symbol;Acc:MGI:2442866]
Svop	7.06	6.53	-4.22	9.94e-05	0.00579	-0.612	-1.53	SV2 related protein [Source:MGI Symbol;Acc:MGI:1915916]
Hes5	2.16	0.962	-4.22	0.0001	0.00581	-1.45	-2.73	hairy and enhancer of split 5 (Drosophila) [Source:MGI Symbol;Acc:MGI:104876]
Phb	5.21	4.57	-4.22	0.0001	0.00581	-0.735	-1.66	prohibitin [Source:MGI Symbol;Acc:MGI:97572]
Pcsk4	3.5	2.51	-4.22	0.000101	0.00581	-1.06	-2.09	proprotein convertase subtilisin/kexin type 4 [Source:MGI Symbol;Acc:MGI:97514]
Pdlim7	5.42	4.63	-4.22	0.000101	0.00581	-0.913	-1.88	PDZ and LIM domain 7 [Source:MGI Symbol;Acc:MGI:1914649]
Ttc39b	6.06	6.8	4.22	0.000102	0.00582	0.71	1.64	tetratricopeptide repeat domain 39B [Source:MGI Symbol;Acc:MGI:1917113]
Sos1	6.69	7.37	4.22	0.000102	0.00582	0.781	1.72	son of sevenless homolog 1 (Drosophila) [Source:MGI Symbol;Acc:MGI:98354]
Trim2	8.61	9.07	4.21	0.000103	0.00584	0.582	1.5	tripartite motif-containing 2 [Source:MGI Symbol;Acc:MGI:1933163]
Rxra	6.34	5.85	-4.21	0.000103	0.00584	-0.612	-1.53	retinoid X receptor alpha [Source:MGI Symbol;Acc:MGI:98214]
Tnrc6b	6.8	7.56	4.21	0.000104	0.00584	0.778	1.71	trinucleotide repeat containing 6b [Source:MGI Symbol;Acc:MGI:2443730]
A230046K03Rik	6.2	6.78	4.21	0.000104	0.00584	0.598	1.51	RIKEN cDNA A230046K03 gene [Source:MGI Symbol;Acc:MGI:2441787]
Tceal3	5.38	4.37	-4.21	0.000105	0.00584	-1.14	-2.21	transcription elongation factor A (SII)-like 3 [Source:MGI Symbol;Acc:MGI:1913354]
Hecw2	4.84	5.48	4.21	0.000105	0.00584	0.596	1.51	HECT, C2 and WW domain containing E3 ubiquitin protein ligase 2 [Source:MGI Symbol;Acc:MGI:2685817]
Gtf2a1	5.25	5.94	4.21	0.000105	0.00584	0.663	1.58	general transcription factor II A, 1 [Source:MGI Symbol;Acc:MGI:1933277]
Serp2	5.1	4.26	-4.21	0.000105	0.00584	-0.922	-1.9	stress-associated endoplasmic reticulum protein family member 2 [Source:MGI Symbol;Acc:MGI:1919911]
Rb1	4.89	5.74	4.21	0.000105	0.00584	0.83	1.78	retinoblastoma 1 [Source:MGI Symbol;Acc:MGI:97874]
Rictor	5.72	6.6	4.21	0.000106	0.00584	0.935	1.91	RPTOR independent companion of MTOR, complex 2 [Source:MGI Symbol;Acc:MGI:1926007]
Slc24a2	7.33	8.3	4.2	0.000106	0.00585	0.993	1.99	solute carrier family 24 (sodium/potassium/calcium exchanger), member 2 [Source:MGI Symbol;Acc:MGI:1923626]
Ogt	8.8	9.51	4.2	0.000107	0.00585	0.798	1.74	O-linked N-acetylglucosamine (GlcNAc) transferase (UDP-N-acetylglucosamine:polypeptide-N-acetylglucosaminyl transferase) [Source:MGI Symbol;Acc:MGI:1339639]
Gck	4.51	3.36	-4.2	0.000107	0.00585	-1.18	-2.27	glucokinase [Source:MGI Symbol;Acc:MGI:1270854]
Tmod2	8.41	9.11	4.2	0.000108	0.00585	0.665	1.59	tropomodulin 2 [Source:MGI Symbol;Acc:MGI:1355335]
Slitrk4	5.3	6.05	4.2	0.000108	0.00585	0.946	1.93	SLIT and NTRK-like family, member 4 [Source:MGI Symbol;Acc:MGI:2442509]
Rb1cc1	6.38	7.03	4.2	0.000108	0.00585	0.677	1.6	RB1-inducible coiled-coil 1 [Source:MGI Symbol;Acc:MGI:1341850]
Anapc5	8.41	8.07	-4.2	0.000108	0.00585	-0.389	-1.31	anaphase-promoting complex subunit 5 [Source:MGI Symbol;Acc:MGI:1929722]
Grik3	6.94	6.43	-4.2	0.000109	0.00586	-0.586	-1.5	glutamate receptor, ionotropic, kainate 3 [Source:MGI Symbol;Acc:MGI:95816]
Otp	5.48	3.91	-4.19	0.00011	0.00587	-1.54	-2.9	orthopedia homolog (Drosophila) [Source:MGI Symbol;Acc:MGI:99835]
Tmem56	5.58	6.23	4.19	0.00011	0.00587	0.801	1.74	transmembrane protein 56 [Source:MGI Symbol;Acc:MGI:1923195]
Zfyve19	4.03	3.54	-4.19	0.00011	0.0059	-0.559	-1.47	zinc finger, FYVE domain containing 19 [Source:MGI Symbol;Acc:MGI:1919258]
Zkscan8	4.08	5.04	4.19	0.000112	0.00593	0.94	1.92	zinc finger with KRAB and SCAN domains 8 [Source:MGI Symbol;Acc:MGI:1913815]
Ubxn2a	5.24	6.04	4.19	0.000112	0.00593	0.799	1.74	UBX domain protein 2A [Source:MGI Symbol;Acc:MGI:2442310]
Zkscan16	4.69	6.31	4.18	0.000113	0.00593	1.62	3.07	zinc finger with KRAB and SCAN domains 16 [Source:MGI Symbol;Acc:MGI:3510405]
Ccser2	6.15	6.73	4.18	0.000113	0.00593	0.588	1.5	coiled-coil serine rich 2 [Source:MGI Symbol;Acc:MGI:101859]
9830147E19Rik	1.38	2.11	4.19	0.000113	0.00593	0.841	1.79	RIKEN cDNA 9830147E19 gene [Source:MGI Symbol;Acc:MGI:3036263]
Gm38393	2.91	4.08	4.19	0.000113	0.00593	1.38	2.61	predicted gene, 38393 [Source:MGI Symbol;Acc:MGI:5613898]
Psd	6.84	6.34	-4.18	0.000113	0.00593	-0.613	-1.53	pleckstrin and Sec7 domain containing [Source:MGI Symbol;Acc:MGI:1920978]
E330009J07Rik	5.97	6.66	4.18	0.000114	0.00593	0.625	1.54	RIKEN cDNA E330009J07 gene [Source:MGI Symbol;Acc:MGI:2444256]
Bmpr2	7.28	8.09	4.18	0.000115	0.00593	0.931	1.91	bone morphogenetic protein receptor, type II (serine/threonine kinase) [Source:MGI Symbol;Acc:MGI:1095407]
Zfp266	5.39	6.19	4.18	0.000115	0.00593	0.802	1.74	zinc finger protein 266 [Source:MGI Symbol;Acc:MGI:1924769]
Rock2	6.97	7.6	4.18	0.000115	0.00593	0.673	1.59	Rho-associated coiled-coil containing protein kinase 2 [Source:MGI Symbol;Acc:MGI:107926]
Sema4a	6.8	6.35	-4.18	0.000115	0.00593	-0.655	-1.57	sema domain, immunoglobulin domain (Ig), transmembrane domain (TM) and short cytoplasmic domain, (semaphorin) 4A [Source:MGI Symbol;Acc:MGI:107560]
Nbeal2	6.2	5.67	-4.18	0.000116	0.00596	-0.624	-1.54	neurobeachin-like 2 [Source:MGI Symbol;Acc:MGI:2448554]
Kcna1	6.96	7.91	4.17	0.000117	0.00599	0.818	1.76	potassium voltage-gated channel, shaker-related subfamily, member 1 [Source:MGI Symbol;Acc:MGI:96654]
Arap2	4.71	5.57	4.17	0.000117	0.00599	0.765	1.7	ArfGAP with RhoGAP domain, ankyrin repeat and PH domain 2 [Source:MGI Symbol;Acc:MGI:2684416]
Frmpd4	5.37	5.96	4.17	0.000118	0.00599	0.688	1.61	FERM and PDZ domain containing 4 [Source:MGI Symbol;Acc:MGI:3042378]
Fam73a	7.33	7.91	4.17	0.000118	0.00602	0.643	1.56	family with sequence similarity 73, member A [Source:MGI Symbol;Acc:MGI:1924567]
Sugp1	4.66	3.93	-4.17	0.000119	0.00605	-0.868	-1.83	SURP and G patch domain containing 1 [Source:MGI Symbol;Acc:MGI:1917866]
AI593442	6.07	6.77	4.17	0.00012	0.00605	0.817	1.76	expressed sequence AI593442 [Source:MGI Symbol;Acc:MGI:2143099]
Bche	1.65	2.64	4.16	0.000121	0.00609	1.08	2.11	butyrylcholinesterase [Source:MGI Symbol;Acc:MGI:894278]
Braf	6.68	7.38	4.16	0.000121	0.00609	0.725	1.65	Braf transforming gene [Source:MGI Symbol;Acc:MGI:88190]
N4bp2l2	5.15	5.79	4.16	0.000123	0.0061	0.794	1.73	NEDD4 binding protein 2-like 2 [Source:MGI Symbol;Acc:MGI:2687207]
Noc4l	3.89	3.32	-4.16	0.000123	0.0061	-0.744	-1.68	nucleolar complex associated 4 homolog (S. cerevisiae) [Source:MGI Symbol;Acc:MGI:2140843]
Manea	5.12	5.95	4.16	0.000123	0.0061	0.902	1.87	mannosidase, endo-alpha [Source:MGI Symbol;Acc:MGI:2444484]
Map4k1	2.44	1.59	-4.16	0.000123	0.0061	-1.01	-2.02	mitogen-activated protein kinase kinase kinase kinase 1 [Source:MGI Symbol;Acc:MGI:1346882]
D930016D06Rik	4.75	5.34	4.16	0.000123	0.0061	0.763	1.7	RIKEN cDNA D930016D06 gene [Source:MGI Symbol;Acc:MGI:2442700]
D17H6S53E	3.74	2.9	-4.15	0.000125	0.00617	-1.03	-2.05	DNA segment, Chr 17, human D6S53E [Source:MGI Symbol;Acc:MGI:90673]
Caly	7.12	6.17	-4.15	0.000125	0.00616	-1.07	-2.09	calcyon neuron-specific vesicular protein [Source:MGI Symbol;Acc:MGI:1915816]
Ttc14	6.33	7.13	4.15	0.000126	0.00617	0.839	1.79	tetratricopeptide repeat domain 14 [Source:MGI Symbol;Acc:MGI:1914370]
Fam208a	5.95	6.63	4.15	0.000126	0.00617	0.783	1.72	family with sequence similarity 208, member A [Source:MGI Symbol;Acc:MGI:1921694]
Setd2	6.18	6.79	4.15	0.000128	0.00623	0.703	1.63	SET domain containing 2 [Source:MGI Symbol;Acc:MGI:1918177]
Trim46	6.47	5.94	-4.15	0.000128	0.00623	-0.555	-1.47	tripartite motif-containing 46 [Source:MGI Symbol;Acc:MGI:2673000]
Dmwd	6.27	5.72	-4.14	0.000129	0.00623	-0.688	-1.61	dystrophia myotonica-containing WD repeat motif [Source:MGI Symbol;Acc:MGI:94907]
Pdcl	5.13	5.72	4.15	0.000129	0.00623	0.708	1.63	phosducin-like [Source:MGI Symbol;Acc:MGI:1914716]
Stx2	5.38	4.97	-4.14	0.00013	0.00623	-0.48	-1.39	syntaxin 2 [Source:MGI Symbol;Acc:MGI:108059]
Gm38190	1.71	3.39	4.14	0.00013	0.00623	1.9	3.73	predicted gene, 38190 [Source:MGI Symbol;Acc:MGI:5611418]
Tmem229a	6.48	7.2	4.14	0.00013	0.00623	0.807	1.75	transmembrane protein 229A [Source:MGI Symbol;Acc:MGI:2442812]
Cpne2	4.78	4.2	-4.14	0.00013	0.00623	-0.617	-1.53	copine II [Source:MGI Symbol;Acc:MGI:2387578]
Zfp799	4.52	5.05	4.14	0.000131	0.00623	0.636	1.55	zinc finger protein 799 [Source:MGI Symbol;Acc:MGI:2443934]
Preb	5.94	5.37	-4.14	0.000131	0.00623	-0.593	-1.51	prolactin regulatory element binding [Source:MGI Symbol;Acc:MGI:1355326]
Pappa	1.28	3.04	4.14	0.000132	0.00623	1.76	3.4	pregnancy-associated plasma protein A [Source:MGI Symbol;Acc:MGI:97479]
Hdgfrp2	6.06	5.38	-4.14	0.000132	0.00623	-0.776	-1.71	hepatoma-derived growth factor, related protein 2 [Source:MGI Symbol;Acc:MGI:1194492]
Smyd5	5.59	5.12	-4.14	0.000132	0.00623	-0.53	-1.44	SET and MYND domain containing 5 [Source:MGI Symbol;Acc:MGI:108048]
Prpf6	6.32	5.79	-4.14	0.000133	0.00623	-0.589	-1.5	PRP6 pre-mRNA splicing factor 6 homolog (yeast) [Source:MGI Symbol;Acc:MGI:1922946]
Hdac6	6.5	6.17	-4.14	0.000133	0.00623	-0.412	-1.33	histone deacetylase 6 [Source:MGI Symbol;Acc:MGI:1333752]
Cops8	7.07	6.74	-4.14	0.000133	0.00623	-0.325	-1.25	COP9 (constitutive photomorphogenic) homolog, subunit 8 (Arabidopsis thaliana) [Source:MGI Symbol;Acc:MGI:1915363]
Hectd1	6.61	7.22	4.13	0.000136	0.00632	0.565	1.48	HECT domain containing 1 [Source:MGI Symbol;Acc:MGI:2384768]
Rab11a	7.14	7.75	4.13	0.000136	0.00632	0.719	1.65	RAB11A, member RAS oncogene family [Source:MGI Symbol;Acc:MGI:1858202]
Crmp1	7.09	6.53	-4.13	0.000136	0.00632	-0.745	-1.68	collapsin response mediator protein 1 [Source:MGI Symbol;Acc:MGI:107793]
Mesdc2	6.22	5.69	-4.13	0.000137	0.00632	-0.597	-1.51	mesoderm development candidate 2 [Source:MGI Symbol;Acc:MGI:1891421]
Borcs8	4.41	3.72	-4.13	0.000137	0.00632	-0.894	-1.86	BLOC-1 related complex subunit 8 [Source:MGI Symbol;Acc:MGI:1919618]
Ptprd	7.39	7.92	4.12	0.00014	0.00645	0.711	1.64	protein tyrosine phosphatase, receptor type, D [Source:MGI Symbol;Acc:MGI:97812]
Ccdc88a	5.82	6.64	4.12	0.00014	0.00645	0.872	1.83	coiled coil domain containing 88A [Source:MGI Symbol;Acc:MGI:1925177]
Oraov1	3.52	2.93	-4.12	0.000141	0.00645	-0.789	-1.73	oral cancer overexpressed 1 [Source:MGI Symbol;Acc:MGI:1919534]
Gm5124	2.36	0.97	-4.12	0.000141	0.00645	-1.54	-2.92	predicted pseudogene 5124 [Source:MGI Symbol;Acc:MGI:3643622]
Ctdspl2	4.84	5.64	4.12	0.000141	0.00645	0.905	1.87	CTD (carboxy-terminal domain, RNA polymerase II, polypeptide A) small phosphatase like 2 [Source:MGI Symbol;Acc:MGI:1196405]
Pura	8.19	8.8	4.11	0.000143	0.00652	0.787	1.72	purine rich element binding protein A [Source:MGI Symbol;Acc:MGI:103079]
Gpi1	8.83	8.35	-4.11	0.000143	0.00652	-0.508	-1.42	glucose phosphate isomerase 1 [Source:MGI Symbol;Acc:MGI:95797]
Tmbim6	8.9	8.54	-4.11	0.000144	0.00653	-0.426	-1.34	transmembrane BAX inhibitor motif containing 6 [Source:MGI Symbol;Acc:MGI:99682]
4930539J05Rik	-1.25	0.7	4.11	0.000145	0.00655	2.76	6.79	RIKEN cDNA 4930539J05 gene [Source:MGI Symbol;Acc:MGI:1922477]
Zfp719	4.11	4.57	4.1	0.000148	0.00668	0.679	1.6	zinc finger protein 719 [Source:MGI Symbol;Acc:MGI:2444708]
Rbms3	6.42	7.14	4.1	0.000149	0.00668	0.868	1.82	RNA binding motif, single stranded interacting protein [Source:MGI Symbol;Acc:MGI:2444477]
Grin2a	5.16	6.17	4.1	0.00015	0.00671	1.16	2.24	glutamate receptor, ionotropic, NMDA2A (epsilon 1) [Source:MGI Symbol;Acc:MGI:95820]
Rnf141	5.67	6.11	4.1	0.00015	0.00672	0.499	1.41	ring finger protein 141 [Source:MGI Symbol;Acc:MGI:1914400]
Vgf	8.48	7.85	-4.1	0.000151	0.00673	-0.704	-1.63	VGF nerve growth factor inducible [Source:MGI Symbol;Acc:MGI:1343180]
Phf6	5.1	5.74	4.09	0.000153	0.0068	0.806	1.75	PHD finger protein 6 [Source:MGI Symbol;Acc:MGI:1918248]
Ptov1	8.22	7.64	-4.09	0.000153	0.0068	-0.623	-1.54	prostate tumor over expressed gene 1 [Source:MGI Symbol;Acc:MGI:1933946]
Plxdc2	4.64	5.28	4.09	0.000154	0.0068	0.73	1.66	plexin domain containing 2 [Source:MGI Symbol;Acc:MGI:1914698]
Rsbn1l	4.5	5	4.09	0.000154	0.0068	0.735	1.66	round spermatid basic protein 1-like [Source:MGI Symbol;Acc:MGI:3036237]
Ptpn4	6.45	7.31	4.09	0.000154	0.0068	1.1	2.14	protein tyrosine phosphatase, non-receptor type 4 [Source:MGI Symbol;Acc:MGI:1099792]
Cipc	6.78	7.15	4.09	0.000155	0.00681	0.367	1.29	CLOCK interacting protein, circadian [Source:MGI Symbol;Acc:MGI:1919185]
Ccnt2	6.53	7.02	4.08	0.000156	0.00683	0.468	1.38	cyclin T2 [Source:MGI Symbol;Acc:MGI:1920199]
Fam45a	5.22	5.75	4.08	0.000156	0.00683	0.567	1.48	family with sequence similarity 45, member A [Source:MGI Symbol;Acc:MGI:1915144]
Tubgcp4	4.09	4.78	4.09	0.000156	0.00682	0.727	1.65	tubulin, gamma complex associated protein 4 [Source:MGI Symbol;Acc:MGI:1196293]
Plat	5.94	5.51	-4.08	0.000158	0.00685	-0.543	-1.46	plasminogen activator, tissue [Source:MGI Symbol;Acc:MGI:97610]
Adra1a	2.04	3.38	4.08	0.000158	0.00685	1.28	2.44	adrenergic receptor, alpha 1a [Source:MGI Symbol;Acc:MGI:104773]
Zfp768	3.2	2.46	-4.08	0.000158	0.00685	-0.745	-1.68	zinc finger protein 768 [Source:MGI Symbol;Acc:MGI:2384582]
Foxp4	5.84	5.33	-4.08	0.000159	0.00686	-0.524	-1.44	forkhead box P4 [Source:MGI Symbol;Acc:MGI:1921373]
Fam110a	3.1	2.18	-4.08	0.00016	0.00687	-1.05	-2.07	family with sequence similarity 110, member A [Source:MGI Symbol;Acc:MGI:1921097]
Zfp14	3.33	3.86	4.08	0.00016	0.00687	0.741	1.67	zinc finger protein 14 [Source:MGI Symbol;Acc:MGI:99160]
Ager	0.973	-0.839	-4.08	0.000161	0.00688	-1.96	-3.88	advanced glycosylation end product-specific receptor [Source:MGI Symbol;Acc:MGI:893592]
Baz2b	5.8	6.46	4.08	0.000161	0.00688	0.738	1.67	bromodomain adjacent to zinc finger domain, 2B [Source:MGI Symbol;Acc:MGI:2442782]
Arfgef1	7.1	7.53	4.08	0.000161	0.00688	0.567	1.48	ADP-ribosylation factor guanine nucleotide-exchange factor 1(brefeldin A-inhibited) [Source:MGI Symbol;Acc:MGI:2442988]
Rasal2	5.52	6.4	4.07	0.000162	0.0069	0.891	1.85	RAS protein activator like 2 [Source:MGI Symbol;Acc:MGI:2443881]
Zfx	4.74	5.46	4.07	0.000163	0.0069	0.727	1.66	zinc finger protein X-linked [Source:MGI Symbol;Acc:MGI:99211]
Arfip2	6.01	5.58	-4.07	0.000163	0.0069	-0.519	-1.43	ADP-ribosylation factor interacting protein 2 [Source:MGI Symbol;Acc:MGI:1924182]
Orc4	5.39	6.09	4.07	0.000164	0.00694	0.877	1.84	origin recognition complex, subunit 4 [Source:MGI Symbol;Acc:MGI:1347043]
Prpf40b	6.36	5.89	-4.07	0.000165	0.00694	-0.565	-1.48	PRP40 pre-mRNA processing factor 40 homolog B (yeast) [Source:MGI Symbol;Acc:MGI:1925583]
Ptprb	4.46	5.22	4.07	0.000166	0.00694	0.772	1.71	protein tyrosine phosphatase, receptor type, B [Source:MGI Symbol;Acc:MGI:97809]
Bysl	3.77	3	-4.07	0.000166	0.00694	-0.918	-1.89	bystin-like [Source:MGI Symbol;Acc:MGI:1858419]
Lrrc73	4.19	3.39	-4.07	0.000166	0.00694	-1.04	-2.06	leucine rich repeat containing 73 [Source:MGI Symbol;Acc:MGI:2684934]
Usp30	5.81	5.37	-4.07	0.000166	0.00694	-0.555	-1.47	ubiquitin specific peptidase 30 [Source:MGI Symbol;Acc:MGI:2140991]
Map1b	10.3	10.9	4.06	0.000167	0.00694	0.608	1.52	microtubule-associated protein 1B [Source:MGI Symbol;Acc:MGI:1306778]
Rfx7	5.17	5.83	4.06	0.000167	0.00694	0.725	1.65	regulatory factor X, 7 [Source:MGI Symbol;Acc:MGI:2442675]
Dcc	1.21	3.79	4.06	0.000168	0.00694	2.57	5.95	deleted in colorectal carcinoma [Source:MGI Symbol;Acc:MGI:94869]
Sgk3	5.31	6.16	4.06	0.000168	0.00694	0.85	1.8	serum/glucocorticoid regulated kinase 3 [Source:MGI Symbol;Acc:MGI:2182368]
Rnasel	3.62	4.2	4.06	0.000169	0.00694	0.584	1.5	ribonuclease L (2', 5'-oligoisoadenylate synthetase-dependent) [Source:MGI Symbol;Acc:MGI:1098272]
Eif1ax	7.22	7.7	4.06	0.000169	0.00694	0.545	1.46	eukaryotic translation initiation factor 1A, X-linked [Source:MGI Symbol;Acc:MGI:1913485]
Grin2b	7.22	7.96	4.06	0.00017	0.00697	0.961	1.95	glutamate receptor, ionotropic, NMDA2B (epsilon 2) [Source:MGI Symbol;Acc:MGI:95821]
Scap	6.76	6.33	-4.06	0.00017	0.00697	-0.449	-1.36	SREBF chaperone [Source:MGI Symbol;Acc:MGI:2135958]
Capza1	4.5	5.14	4.06	0.00017	0.00697	0.74	1.67	capping protein (actin filament) muscle Z-line, alpha 1 [Source:MGI Symbol;Acc:MGI:106227]
Kifc3	6.13	5.65	-4.06	0.000171	0.00698	-0.571	-1.49	kinesin family member C3 [Source:MGI Symbol;Acc:MGI:109202]
Clasp2	8.07	8.56	4.05	0.000173	0.00703	0.514	1.43	CLIP associating protein 2 [Source:MGI Symbol;Acc:MGI:1923749]
Zfp420	4.39	4.83	4.05	0.000173	0.00703	0.666	1.59	zinc finger protein 420 [Source:MGI Symbol;Acc:MGI:2444666]
Sbno1	6.87	7.29	4.05	0.000174	0.00704	0.433	1.35	sno, strawberry notch homolog 1 (Drosophila) [Source:MGI Symbol;Acc:MGI:2384298]
Ubn2	6.58	7.19	4.05	0.000174	0.00705	0.69	1.61	ubinuclein 2 [Source:MGI Symbol;Acc:MGI:2444236]
A230056P14Rik	4.21	5	4.05	0.000175	0.00705	0.756	1.69	RIKEN cDNA A230056P14 gene [Source:MGI Symbol;Acc:MGI:2444856]
Itgb8	6.16	7.2	4.05	0.000175	0.00705	1.07	2.09	integrin beta 8 [Source:MGI Symbol;Acc:MGI:1338035]
Samd14	6.38	5.61	-4.05	0.000176	0.00706	-0.876	-1.84	sterile alpha motif domain containing 14 [Source:MGI Symbol;Acc:MGI:2384945]
Msln	0.624	-1.25	-4.05	0.000177	0.00706	-1.88	-3.69	mesothelin [Source:MGI Symbol;Acc:MGI:1888992]
Ank2	9.29	9.79	4.05	0.000177	0.00706	0.532	1.45	ankyrin 2, brain [Source:MGI Symbol;Acc:MGI:88025]
Fgd4	4.22	5.19	4.05	0.000178	0.00706	0.988	1.98	FYVE, RhoGEF and PH domain containing 4 [Source:MGI Symbol;Acc:MGI:2183747]
Hyi	3.43	2.56	-4.04	0.000178	0.00706	-0.947	-1.93	hydroxypyruvate isomerase homolog (E. coli) [Source:MGI Symbol;Acc:MGI:1915430]
Ric8	5.22	4.7	-4.04	0.000178	0.00706	-0.68	-1.6	resistance to inhibitors of cholinesterase 8 homolog (C. elegans) [Source:MGI Symbol;Acc:MGI:2141866]
Edem1	4.96	5.51	4.04	0.000178	0.00706	0.554	1.47	ER degradation enhancer, mannosidase alpha-like 1 [Source:MGI Symbol;Acc:MGI:2180139]
Lypla1	5.01	5.54	4.04	0.00018	0.00709	0.767	1.7	lysophospholipase 1 [Source:MGI Symbol;Acc:MGI:1344588]
Nufip2	5.29	6.09	4.04	0.00018	0.00709	0.918	1.89	nuclear fragile X mental retardation protein interacting protein 2 [Source:MGI Symbol;Acc:MGI:1915814]
2210016L21Rik	5.86	5.18	-4.04	0.00018	0.00709	-0.801	-1.74	RIKEN cDNA 2210016L21 gene [Source:MGI Symbol;Acc:MGI:1919607]
Znf512b	6.61	6.24	-4.04	0.000181	0.00709	-0.559	-1.47	zinc finger protein 512B [Source:MGI Symbol;Acc:MGI:2685478]
Utrn	6.22	6.92	4.04	0.000182	0.0071	0.657	1.58	utrophin [Source:MGI Symbol;Acc:MGI:104631]
Kdm7a	5.2	5.85	4.04	0.000182	0.0071	0.833	1.78	lysine (K)-specific demethylase 7A [Source:MGI Symbol;Acc:MGI:2443388]
Sumo3	6.77	6.38	-4.04	0.000182	0.0071	-0.423	-1.34	small ubiquitin-like modifier 3 [Source:MGI Symbol;Acc:MGI:1336201]
Pomc	4.17	1.77	-4.04	0.000183	0.0071	-2.14	-4.42	pro-opiomelanocortin-alpha [Source:MGI Symbol;Acc:MGI:97742]
Zfp946	4.52	5.07	4.04	0.000183	0.0071	0.611	1.53	zinc finger protein 946 [Source:MGI Symbol;Acc:MGI:1921399]
Gm36936	0.477	2.47	4.04	0.000184	0.00711	1.99	3.98	predicted gene, 36936 [Source:MGI Symbol;Acc:MGI:5610164]
Nelfcd	5.81	5.23	-4.03	0.000184	0.00712	-0.636	-1.55	negative elongation factor complex member C/D, Th1l [Source:MGI Symbol;Acc:MGI:1926424]
Zswim8	7.62	7.2	-4.03	0.000185	0.00712	-0.566	-1.48	zinc finger SWIM-type containing 8 [Source:MGI Symbol;Acc:MGI:1919156]
Mapk9	8.34	8.79	4.03	0.000186	0.00716	0.391	1.31	mitogen-activated protein kinase 9 [Source:MGI Symbol;Acc:MGI:1346862]
Ube3a	7.84	8.45	4.03	0.000187	0.00718	0.851	1.8	ubiquitin protein ligase E3A [Source:MGI Symbol;Acc:MGI:105098]
Atxn3	5.16	5.64	4.03	0.000187	0.00718	0.664	1.58	ataxin 3 [Source:MGI Symbol;Acc:MGI:1099442]
Ireb2	7.09	7.49	4.03	0.000189	0.00718	0.526	1.44	iron responsive element binding protein 2 [Source:MGI Symbol;Acc:MGI:1928268]
Obsl1	3.99	3.41	-4.03	0.000189	0.00718	-0.876	-1.83	obscurin-like 1 [Source:MGI Symbol;Acc:MGI:2138628]
Ankrd28	4.98	5.8	4.02	0.00019	0.00718	0.71	1.64	ankyrin repeat domain 28 [Source:MGI Symbol;Acc:MGI:2145661]
Trove2	6.37	7.11	4.02	0.00019	0.00718	0.917	1.89	TROVE domain family, member 2 [Source:MGI Symbol;Acc:MGI:106652]
Cbll1	4.44	4.99	4.02	0.00019	0.00718	0.769	1.7	Casitas B-lineage lymphoma-like 1 [Source:MGI Symbol;Acc:MGI:2144842]
Relt	4.75	4.23	-4.02	0.000191	0.00718	-0.698	-1.62	RELT tumor necrosis factor receptor [Source:MGI Symbol;Acc:MGI:2443373]
Cntnap5a	4.88	5.99	4.02	0.000191	0.00718	1.04	2.06	contactin associated protein-like 5A [Source:MGI Symbol;Acc:MGI:3643623]
Ehmt1	5.81	5.53	-4.02	0.000191	0.00718	-0.369	-1.29	euchromatic histone methyltransferase 1 [Source:MGI Symbol;Acc:MGI:1924933]
Esrrg	5.02	5.89	4.02	0.000191	0.00718	0.933	1.91	estrogen-related receptor gamma [Source:MGI Symbol;Acc:MGI:1347056]
Klf12	0.95	2.75	4.02	0.000192	0.00718	2.14	4.39	Kruppel-like factor 12 [Source:MGI Symbol;Acc:MGI:1333796]
Strn	5.85	6.48	4.02	0.000192	0.00718	0.625	1.54	striatin, calmodulin binding protein [Source:MGI Symbol;Acc:MGI:1333757]
Hmcn2	4.69	3.52	-4.02	0.000192	0.00718	-1.21	-2.31	hemicentin 2 [Source:MGI Symbol;Acc:MGI:2677838]
Cep131	4.85	4.03	-4.02	0.000193	0.00718	-0.844	-1.8	centrosomal protein 131 [Source:MGI Symbol;Acc:MGI:107440]
Mme	3.41	4.55	4.02	0.000194	0.00721	1.08	2.11	membrane metallo endopeptidase [Source:MGI Symbol;Acc:MGI:97004]
Nbeal1	5.14	5.9	4.02	0.000194	0.00721	0.819	1.76	neurobeachin like 1 [Source:MGI Symbol;Acc:MGI:2444343]
D3Ertd254e	5.07	5.58	4.01	0.000197	0.00728	0.618	1.53	DNA segment, Chr 3, ERATO Doi 254, expressed [Source:MGI Symbol;Acc:MGI:1098769]
Calcoco1	5.9	5.5	-4.01	0.000197	0.00728	-0.47	-1.39	calcium binding and coiled coil domain 1 [Source:MGI Symbol;Acc:MGI:1914738]
Lrig2	6.07	6.58	4.01	0.000199	0.00732	0.534	1.45	leucine-rich repeats and immunoglobulin-like domains 2 [Source:MGI Symbol;Acc:MGI:2443718]
Ormdl3	6.22	5.65	-4.01	0.000199	0.00732	-0.674	-1.6	ORM1-like 3 (S. cerevisiae) [Source:MGI Symbol;Acc:MGI:1913862]
Tmem161a	5.29	4.75	-4.01	0.0002	0.00735	-0.614	-1.53	transmembrane protein 161A [Source:MGI Symbol;Acc:MGI:2384577]
Klhl15	4.04	5.04	4.01	0.000201	0.00736	0.958	1.94	kelch-like 15 [Source:MGI Symbol;Acc:MGI:1923400]
Mroh7	4.19	3.33	-4	0.000202	0.00736	-0.882	-1.84	maestro heat-like repeat family member 7 [Source:MGI Symbol;Acc:MGI:2685873]
Cbl	2.72	4.97	4	0.000203	0.00736	2.1	4.28	Casitas B-lineage lymphoma [Source:MGI Symbol;Acc:MGI:88279]
Golga3	6.4	6.83	4	0.000203	0.00736	0.47	1.39	golgi autoantigen, golgin subfamily a, 3 [Source:MGI Symbol;Acc:MGI:96958]
Zfp874b	3.66	4.17	4	0.000203	0.00736	0.746	1.68	zinc finger protein 874b [Source:MGI Symbol;Acc:MGI:3040702]
Agap3	7.63	7.07	-4	0.000203	0.00736	-0.679	-1.6	ArfGAP with GTPase domain, ankyrin repeat and PH domain 3 [Source:MGI Symbol;Acc:MGI:2183446]
Gm11732	0.268	-1.04	-4	0.000203	0.00736	-1.52	-2.87	predicted gene 11732 [Source:MGI Symbol;Acc:MGI:3652087]
2900097C17Rik	5.68	6.63	4	0.000204	0.00737	0.853	1.81	RIKEN cDNA 2900097C17 gene [Source:MGI Symbol;Acc:MGI:1914767]
Traf4	3.6	3.06	-4	0.000205	0.0074	-0.677	-1.6	TNF receptor associated factor 4 [Source:MGI Symbol;Acc:MGI:1202880]
Chd6	7.11	7.77	4	0.000206	0.0074	0.624	1.54	chromodomain helicase DNA binding protein 6 [Source:MGI Symbol;Acc:MGI:1918639]
Ces1d	1.87	0.211	-4	0.000206	0.0074	-1.77	-3.41	carboxylesterase 1D [Source:MGI Symbol;Acc:MGI:2148202]
Ppp1r8	5.3	4.8	-4	0.000209	0.00746	-0.566	-1.48	protein phosphatase 1, regulatory (inhibitor) subunit 8 [Source:MGI Symbol;Acc:MGI:2140494]
Prkaa2	5.26	6.03	4	0.000209	0.00746	0.906	1.87	protein kinase, AMP-activated, alpha 2 catalytic subunit [Source:MGI Symbol;Acc:MGI:1336173]
Gm38383	-2.87	-0.779	3.99	0.00021	0.0075	2.41	5.3	predicted gene, 38383 [Source:MGI Symbol;Acc:MGI:5611611]
Scn2a1	8.03	8.68	3.99	0.000211	0.0075	0.767	1.7	sodium channel, voltage-gated, type II, alpha 1 [Source:MGI Symbol;Acc:MGI:98248]
Ldb1	6.75	6.31	-3.99	0.000211	0.0075	-0.517	-1.43	LIM domain binding 1 [Source:MGI Symbol;Acc:MGI:894762]
Plch1	4.4	5.15	3.99	0.000212	0.00751	0.736	1.67	phospholipase C, eta 1 [Source:MGI Symbol;Acc:MGI:2683547]
Ecel1	7.5	6.45	-3.99	0.000212	0.00751	-1.14	-2.21	endothelin converting enzyme-like 1 [Source:MGI Symbol;Acc:MGI:1343461]
Eea1	5.89	6.56	3.99	0.000214	0.00755	0.798	1.74	early endosome antigen 1 [Source:MGI Symbol;Acc:MGI:2442192]
Pdzd4	6.67	6.2	-3.99	0.000214	0.00755	-0.535	-1.45	PDZ domain containing 4 [Source:MGI Symbol;Acc:MGI:2443483]
Zfr2	5.62	5.17	-3.99	0.000215	0.00756	-0.565	-1.48	zinc finger RNA binding protein 2 [Source:MGI Symbol;Acc:MGI:2143792]
Bag6	7.57	7.23	-3.99	0.000215	0.00757	-0.508	-1.42	BCL2-associated athanogene 6 [Source:MGI Symbol;Acc:MGI:1919439]
Supt5	7.44	7.02	-3.98	0.000216	0.00757	-0.586	-1.5	suppressor of Ty 5 [Source:MGI Symbol;Acc:MGI:1202400]
Ccdc42b	1.06	-0.713	-3.98	0.000216	0.00757	-1.94	-3.84	coiled-coil domain containing 42B [Source:MGI Symbol;Acc:MGI:3779542]
Etohi1	1.81	2.85	3.98	0.000218	0.00761	1.21	2.31	ethanol induced 1 [Source:MGI Symbol;Acc:MGI:1261426]
Rab26	4.69	4.04	-3.98	0.00022	0.00766	-0.739	-1.67	RAB26, member RAS oncogene family [Source:MGI Symbol;Acc:MGI:2443284]
C2cd2l	6.18	5.57	-3.98	0.00022	0.00766	-0.685	-1.61	C2 calcium-dependent domain containing 2-like [Source:MGI Symbol;Acc:MGI:1919014]
Zbtb1	4.35	4.86	3.98	0.000221	0.00766	0.656	1.58	zinc finger and BTB domain containing 1 [Source:MGI Symbol;Acc:MGI:2442326]
Tmem214	6.22	5.81	-3.98	0.000221	0.00766	-0.473	-1.39	transmembrane protein 214 [Source:MGI Symbol;Acc:MGI:1916046]
Fam135a	5.16	5.82	3.98	0.000222	0.00767	0.804	1.75	family with sequence similarity 135, member A [Source:MGI Symbol;Acc:MGI:1915437]
Camk1g	6.24	5.34	-3.98	0.000222	0.00767	-0.847	-1.8	calcium/calmodulin-dependent protein kinase I gamma [Source:MGI Symbol;Acc:MGI:2388073]
Raph1	6.02	6.5	3.97	0.000223	0.00768	0.577	1.49	Ras association (RalGDS/AF-6) and pleckstrin homology domains 1 [Source:MGI Symbol;Acc:MGI:1924550]
Radil	4.47	4.02	-3.97	0.000225	0.00771	-0.65	-1.57	Ras association and DIL domains [Source:MGI Symbol;Acc:MGI:2443088]
Man1a2	6.57	7.31	3.97	0.000225	0.00771	0.839	1.79	mannosidase, alpha, class 1A, member 2 [Source:MGI Symbol;Acc:MGI:104676]
Tnfrsf23	-0.694	0.971	3.97	0.000225	0.00771	2.45	5.48	tumor necrosis factor receptor superfamily, member 23 [Source:MGI Symbol;Acc:MGI:1930269]
Megf9	7.04	7.58	3.97	0.000227	0.00772	0.6	1.52	multiple EGF-like-domains 9 [Source:MGI Symbol;Acc:MGI:1918264]
Zfp846	4.03	4.67	3.97	0.000227	0.00772	0.734	1.66	zinc finger protein 846 [Source:MGI Symbol;Acc:MGI:1924012]
Mest	3.98	4.69	3.97	0.000227	0.00772	0.807	1.75	mesoderm specific transcript [Source:MGI Symbol;Acc:MGI:96968]
Magel2	5.93	4.86	-3.97	0.000227	0.00772	-1.14	-2.21	melanoma antigen, family L, 2 [Source:MGI Symbol;Acc:MGI:1351648]
Wbscr22	4.35	3.77	-3.97	0.000228	0.00774	-0.751	-1.68	Williams Beuren syndrome chromosome region 22 [Source:MGI Symbol;Acc:MGI:1913388]
Tmem114	2.38	0.4	-3.97	0.000229	0.00775	-1.78	-3.43	transmembrane protein 114 [Source:MGI Symbol;Acc:MGI:1921970]
Synj2bp	5.54	6.1	3.97	0.000229	0.00774	0.721	1.65	synaptojanin 2 binding protein [Source:MGI Symbol;Acc:MGI:1344347]
Ccnc	5.4	5.8	3.97	0.00023	0.00775	0.637	1.56	cyclin C [Source:MGI Symbol;Acc:MGI:1858199]
Gm42664	0.303	2.89	3.96	0.000231	0.00776	2.75	6.71	predicted gene 42664 [Source:MGI Symbol;Acc:MGI:5662801]
Usp24	6.68	7.33	3.96	0.000231	0.00776	0.637	1.56	ubiquitin specific peptidase 24 [Source:MGI Symbol;Acc:MGI:1919936]
Dennd6b	6.51	6.05	-3.96	0.000233	0.00779	-0.592	-1.51	DENN/MADD domain containing 6B [Source:MGI Symbol;Acc:MGI:1916690]
Pafah1b1	9.53	10	3.96	0.000234	0.00781	0.503	1.42	platelet-activating factor acetylhydrolase, isoform 1b, subunit 1 [Source:MGI Symbol;Acc:MGI:109520]
Ccdc186	6.09	6.58	3.96	0.000234	0.00781	0.428	1.35	coiled-coil domain containing 186 [Source:MGI Symbol;Acc:MGI:2445022]
Lcor	0.862	3.48	3.96	0.000235	0.00784	2.87	7.34	ligand dependent nuclear receptor corepressor [Source:MGI Symbol;Acc:MGI:2443930]
Nsd1	7.04	7.63	3.96	0.000236	0.00784	0.573	1.49	nuclear receptor-binding SET-domain protein 1 [Source:MGI Symbol;Acc:MGI:1276545]
Usp34	7.03	7.88	3.96	0.000236	0.00784	0.871	1.83	ubiquitin specific peptidase 34 [Source:MGI Symbol;Acc:MGI:109473]
Gm13617	-0.482	-1.9	-3.96	0.000237	0.00784	-1.88	-3.67	predicted gene 13617 [Source:MGI Symbol;Acc:MGI:3650300]
AI846148	4.79	4.15	-3.96	0.000237	0.00784	-0.556	-1.47	expressed sequence AI846148 [Source:MGI Symbol;Acc:MGI:2147611]
Scyl1	5.72	5.1	-3.95	0.000238	0.00784	-0.766	-1.7	SCY1-like 1 (S. cerevisiae) [Source:MGI Symbol;Acc:MGI:1931787]
Anln	5.89	6.74	3.95	0.000241	0.00792	0.773	1.71	anillin, actin binding protein [Source:MGI Symbol;Acc:MGI:1920174]
Pcgf2	4.64	4.14	-3.95	0.000241	0.00792	-0.624	-1.54	polycomb group ring finger 2 [Source:MGI Symbol;Acc:MGI:99161]
Fmn1	2.44	3.41	3.95	0.000242	0.00793	0.865	1.82	formin 1 [Source:MGI Symbol;Acc:MGI:101815]
Pnmal2	9.6	8.99	-3.95	0.000242	0.00792	-0.66	-1.58	PNMA-like 2 [Source:MGI Symbol;Acc:MGI:3645856]
Tmem180	5.14	4.5	-3.95	0.000242	0.00792	-0.742	-1.67	transmembrane protein 180 [Source:MGI Symbol;Acc:MGI:1922396]
Zfp335	3.91	3.51	-3.94	0.000248	0.00806	-0.701	-1.63	zinc finger protein 335 [Source:MGI Symbol;Acc:MGI:2682313]
Asxl2	4.36	5.17	3.94	0.000248	0.00806	0.682	1.6	additional sex combs like 2 (Drosophila) [Source:MGI Symbol;Acc:MGI:1922552]
Etnk1	9.28	9.76	3.94	0.000248	0.00806	0.569	1.48	ethanolamine kinase 1 [Source:MGI Symbol;Acc:MGI:1922570]
Ppp1r10	5.63	5.34	-3.94	0.000249	0.0081	-0.4	-1.32	protein phosphatase 1, regulatory subunit 10 [Source:MGI Symbol;Acc:MGI:1289273]
Dffb	3.84	3.21	-3.94	0.000251	0.00813	-0.838	-1.79	DNA fragmentation factor, beta subunit [Source:MGI Symbol;Acc:MGI:1196287]
Umps	3.77	3.38	-3.94	0.000252	0.00813	-0.484	-1.4	uridine monophosphate synthetase [Source:MGI Symbol;Acc:MGI:1298388]
Wdr24	5.02	4.5	-3.94	0.000252	0.00813	-0.759	-1.69	WD repeat domain 24 [Source:MGI Symbol;Acc:MGI:2446285]
Hexim1	5.95	5.35	-3.93	0.000255	0.00822	-0.635	-1.55	hexamethylene bis-acetamide inducible 1 [Source:MGI Symbol;Acc:MGI:2385923]
Slc9a7	2.29	4.14	3.93	0.000256	0.00822	1.89	3.71	solute carrier family 9 (sodium/hydrogen exchanger), member 7 [Source:MGI Symbol;Acc:MGI:2444530]
Dsel	4.52	5.04	3.93	0.000256	0.00822	0.683	1.6	dermatan sulfate epimerase-like [Source:MGI Symbol;Acc:MGI:2442948]
Kmt2b	6.62	6.2	-3.93	0.000256	0.00822	-0.667	-1.59	lysine (K)-specific methyltransferase 2B [Source:MGI Symbol;Acc:MGI:109565]
Gnb2	7.54	6.88	-3.93	0.000258	0.00824	-0.739	-1.67	guanine nucleotide binding protein (G protein), beta 2 [Source:MGI Symbol;Acc:MGI:95784]
Ap1g1	6.78	7.35	3.93	0.000259	0.00824	0.596	1.51	adaptor protein complex AP-1, gamma 1 subunit [Source:MGI Symbol;Acc:MGI:101919]
Phc2	6.2	5.74	-3.93	0.00026	0.00824	-0.554	-1.47	polyhomeotic-like 2 (Drosophila) [Source:MGI Symbol;Acc:MGI:1860454]
Nfkbib	3.48	2.68	-3.93	0.00026	0.00824	-1.04	-2.05	nuclear factor of kappa light polypeptide gene enhancer in B cells inhibitor, beta [Source:MGI Symbol;Acc:MGI:104752]
BC029722	5.16	4.55	-3.93	0.00026	0.00824	-0.835	-1.78	cDNA sequence BC029722 [Source:MGI Symbol;Acc:MGI:3584273]
Asl	4.69	4	-3.93	0.00026	0.00824	-0.918	-1.89	argininosuccinate lyase [Source:MGI Symbol;Acc:MGI:88084]
Eif4b	8.15	7.83	-3.93	0.00026	0.00824	-0.392	-1.31	eukaryotic translation initiation factor 4B [Source:MGI Symbol;Acc:MGI:95304]
Kat2b	4.41	5.13	3.92	0.000262	0.00827	0.649	1.57	K(lysine) acetyltransferase 2B [Source:MGI Symbol;Acc:MGI:1343094]
B230354K17Rik	3.72	4.22	3.92	0.000262	0.00827	0.596	1.51	RIKEN cDNA B230354K17 gene [Source:MGI Symbol;Acc:MGI:2443272]
Adcy6	7.21	6.75	-3.92	0.000263	0.00827	-0.564	-1.48	adenylate cyclase 6 [Source:MGI Symbol;Acc:MGI:87917]
Mpp2	6.9	6.41	-3.92	0.000263	0.00827	-0.563	-1.48	membrane protein, palmitoylated 2 (MAGUK p55 subfamily member 2) [Source:MGI Symbol;Acc:MGI:1858257]
Cc2d1a	6.05	5.39	-3.92	0.000267	0.00835	-0.705	-1.63	coiled-coil and C2 domain containing 1A [Source:MGI Symbol;Acc:MGI:2384831]
Zbtb41	4.57	5.32	3.92	0.000267	0.00835	0.891	1.85	zinc finger and BTB domain containing 41 homolog [Source:MGI Symbol;Acc:MGI:2444487]
Smim13	7.72	8.2	3.92	0.000268	0.00835	0.653	1.57	small integral membrane protein 13 [Source:MGI Symbol;Acc:MGI:2652854]
Rapgef6	5.62	6.25	3.92	0.000269	0.00835	0.667	1.59	Rap guanine nucleotide exchange factor (GEF) 6 [Source:MGI Symbol;Acc:MGI:2384761]
Clasrp	6.14	5.51	-3.92	0.000269	0.00835	-0.712	-1.64	CLK4-associating serine/arginine rich protein [Source:MGI Symbol;Acc:MGI:1855695]
Lrrc58	7.03	7.94	3.92	0.00027	0.00835	1	2	leucine rich repeat containing 58 [Source:MGI Symbol;Acc:MGI:2443542]
Prrc2a	8.98	8.62	-3.91	0.00027	0.00835	-0.425	-1.34	proline-rich coiled-coil 2A [Source:MGI Symbol;Acc:MGI:1915467]
Clock	6.33	6.83	3.91	0.000271	0.00835	0.532	1.45	circadian locomotor output cycles kaput [Source:MGI Symbol;Acc:MGI:99698]
Flad1	4.69	4.31	-3.91	0.000271	0.00835	-0.573	-1.49	RFad1, flavin adenine dinucleotide synthetase, homolog (yeast) [Source:MGI Symbol;Acc:MGI:2443030]
Pja1	7.92	7.48	-3.91	0.000271	0.00835	-0.454	-1.37	praja ring finger 1, E3 ubiquitin protein ligase [Source:MGI Symbol;Acc:MGI:1101765]
Wnk1	7.74	8.28	3.91	0.000272	0.00835	0.595	1.51	WNK lysine deficient protein kinase 1 [Source:MGI Symbol;Acc:MGI:2442092]
Aldh6a1	6.79	7.39	3.91	0.000272	0.00835	0.701	1.63	aldehyde dehydrogenase family 6, subfamily A1 [Source:MGI Symbol;Acc:MGI:1915077]
Fbxw17	4.02	3.54	-3.91	0.000272	0.00835	-0.605	-1.52	F-box and WD-40 domain protein 17 [Source:MGI Symbol;Acc:MGI:1923584]
Pcmtd1	6.47	7.03	3.91	0.000272	0.00835	0.58	1.49	protein-L-isoaspartate (D-aspartate) O-methyltransferase domain containing 1 [Source:MGI Symbol;Acc:MGI:2441773]
Cxx1c	6.03	5.34	-3.91	0.000273	0.00836	-0.877	-1.84	CAAX box 1C [Source:MGI Symbol;Acc:MGI:1920115]
Rgl2	6.61	6.12	-3.91	0.000274	0.00836	-0.632	-1.55	ral guanine nucleotide dissociation stimulator-like 2 [Source:MGI Symbol;Acc:MGI:107483]
Srrt	7.08	6.69	-3.91	0.000275	0.00837	-0.454	-1.37	serrate RNA effector molecule homolog (Arabidopsis) [Source:MGI Symbol;Acc:MGI:1933527]
Ccdc57	3.62	3.18	-3.91	0.000276	0.00841	-0.661	-1.58	coiled-coil domain containing 57 [Source:MGI Symbol;Acc:MGI:1918526]
Gm5422	-0.568	-2.43	-3.91	0.000277	0.00841	-2.26	-4.79	predicted pseudogene 5422 [Source:MGI Symbol;Acc:MGI:3643411]
Arl5a	6.28	6.86	3.9	0.000279	0.00844	0.68	1.6	ADP-ribosylation factor-like 5A [Source:MGI Symbol;Acc:MGI:1922673]
Tmem33	6.64	7.18	3.9	0.000279	0.00844	0.574	1.49	transmembrane protein 33 [Source:MGI Symbol;Acc:MGI:1915128]
Cul9	7.04	6.66	-3.9	0.00028	0.00844	-0.471	-1.39	cullin 9 [Source:MGI Symbol;Acc:MGI:1925559]
Casp8ap2	3.62	4.27	3.9	0.00028	0.00844	0.788	1.73	caspase 8 associated protein 2 [Source:MGI Symbol;Acc:MGI:1349399]
Pank1	4.43	4.84	3.9	0.00028	0.00844	0.504	1.42	pantothenate kinase 1 [Source:MGI Symbol;Acc:MGI:1922985]
Pclo	7.03	7.71	3.9	0.000282	0.00845	0.704	1.63	piccolo (presynaptic cytomatrix protein) [Source:MGI Symbol;Acc:MGI:1349390]
Csde1	8.44	8.87	3.9	0.000282	0.00845	0.518	1.43	cold shock domain containing E1, RNA binding [Source:MGI Symbol;Acc:MGI:92356]
Ltn1	6.34	6.9	3.9	0.000282	0.00845	0.575	1.49	listerin E3 ubiquitin protein ligase 1 [Source:MGI Symbol;Acc:MGI:1926163]
Pla2g6	4.47	3.95	-3.9	0.000283	0.00845	-0.729	-1.66	phospholipase A2, group VI [Source:MGI Symbol;Acc:MGI:1859152]
Marf1	7.18	7.71	3.9	0.000283	0.00845	0.559	1.47	meiosis arrest female 1 [Source:MGI Symbol;Acc:MGI:2444505]
Ryr2	7.02	7.84	3.9	0.000284	0.00847	0.733	1.66	ryanodine receptor 2, cardiac [Source:MGI Symbol;Acc:MGI:99685]
Csrnp3	6.82	7.39	3.9	0.000285	0.00849	0.633	1.55	cysteine-serine-rich nuclear protein 3 [Source:MGI Symbol;Acc:MGI:1925021]
Rab5a	6.5	6.98	3.9	0.000286	0.00849	0.519	1.43	RAB5A, member RAS oncogene family [Source:MGI Symbol;Acc:MGI:105926]
C2cd2	4.53	4.93	3.9	0.000286	0.00849	0.441	1.36	C2 calcium-dependent domain containing 2 [Source:MGI Symbol;Acc:MGI:1891883]
Gm37850	-0.738	1.03	3.9	0.000287	0.00849	2.19	4.56	predicted gene, 37850 [Source:MGI Symbol;Acc:MGI:5611078]
Samd11	2.3	1.43	-3.89	0.000288	0.00851	-1.17	-2.25	sterile alpha motif domain containing 11 [Source:MGI Symbol;Acc:MGI:2446220]
Slf1	4.54	4.97	3.89	0.000289	0.00851	0.648	1.57	SMC5-SMC6 complex localization factor 1 [Source:MGI Symbol;Acc:MGI:2145448]
Slc4a8	7.25	7.86	3.89	0.00029	0.00851	0.565	1.48	solute carrier family 4 (anion exchanger), member 8 [Source:MGI Symbol;Acc:MGI:1928745]
Evpl	4.39	3.9	-3.89	0.00029	0.00851	-0.636	-1.55	envoplakin [Source:MGI Symbol;Acc:MGI:107507]
Scrib	6.22	5.86	-3.89	0.00029	0.00851	-0.556	-1.47	scribbled homolog (Drosophila) [Source:MGI Symbol;Acc:MGI:2145950]
Tia1	7.02	7.67	3.89	0.000291	0.00851	0.734	1.66	cytotoxic granule-associated RNA binding protein 1 [Source:MGI Symbol;Acc:MGI:107914]
Ranbp2	6.91	7.57	3.89	0.000291	0.00851	0.766	1.7	RAN binding protein 2 [Source:MGI Symbol;Acc:MGI:894323]
Ublcp1	5.73	6.19	3.89	0.000291	0.00851	0.6	1.52	ubiquitin-like domain containing CTD phosphatase 1 [Source:MGI Symbol;Acc:MGI:1933105]
Gm15777	-0.421	1.54	3.89	0.000292	0.00851	2.08	4.23	predicted gene 15777 [Source:MGI Symbol;Acc:MGI:3783219]
Fezf1	4.11	1.48	-3.89	0.000292	0.00851	-2.07	-4.21	Fez family zinc finger 1 [Source:MGI Symbol;Acc:MGI:1920441]
Nipbl	5.26	6	3.89	0.000294	0.00856	0.718	1.64	Nipped-B homolog (Drosophila) [Source:MGI Symbol;Acc:MGI:1913976]
Snapc4	5.84	5.48	-3.89	0.000295	0.00856	-0.468	-1.38	small nuclear RNA activating complex, polypeptide 4 [Source:MGI Symbol;Acc:MGI:2443935]
Gm10010	-0.762	1.79	3.89	0.000296	0.00858	2.59	6.03	predicted gene 10010 [Source:MGI Symbol;Acc:MGI:3641978]
Runx1t1	5.38	5.84	3.89	0.000296	0.00858	0.661	1.58	runt-related transcription factor 1; translocated to, 1 (cyclin D-related) [Source:MGI Symbol;Acc:MGI:104793]
Ptpn23	6.55	6.2	-3.88	0.000298	0.0086	-0.489	-1.4	protein tyrosine phosphatase, non-receptor type 23 [Source:MGI Symbol;Acc:MGI:2144837]
Begain	5.8	5.26	-3.88	0.000299	0.00863	-0.498	-1.41	brain-enriched guanylate kinase-associated [Source:MGI Symbol;Acc:MGI:3044626]
Il1rap	5.2	5.89	3.88	0.0003	0.00863	0.646	1.56	interleukin 1 receptor accessory protein [Source:MGI Symbol;Acc:MGI:104975]
Vps45	5.66	5.18	-3.88	0.000301	0.00865	-0.45	-1.37	vacuolar protein sorting 45 (yeast) [Source:MGI Symbol;Acc:MGI:891965]
Pi16	3.18	2.09	-3.88	0.000302	0.00867	-1.04	-2.06	peptidase inhibitor 16 [Source:MGI Symbol;Acc:MGI:1921366]
Rnpepl1	5.54	5.1	-3.88	0.000303	0.00867	-0.557	-1.47	arginyl aminopeptidase (aminopeptidase B)-like 1 [Source:MGI Symbol;Acc:MGI:1914170]
Mars2	4.16	4.78	3.88	0.000303	0.00867	0.787	1.72	methionine-tRNA synthetase 2 (mitochondrial) [Source:MGI Symbol;Acc:MGI:2444136]
Fat3	5.98	6.69	3.88	0.000304	0.00869	0.65	1.57	FAT tumor suppressor homolog 3 (Drosophila) [Source:MGI Symbol;Acc:MGI:2444314]
Tet2	5.4	6.11	3.88	0.000305	0.0087	0.652	1.57	tet methylcytosine dioxygenase 2 [Source:MGI Symbol;Acc:MGI:2443298]
Phf2	5.83	5.6	-3.87	0.000306	0.0087	-0.507	-1.42	PHD finger protein 2 [Source:MGI Symbol;Acc:MGI:1338034]
Erbb2ip	6.18	6.91	3.87	0.000307	0.0087	0.631	1.55	Erbb2 interacting protein [Source:MGI Symbol;Acc:MGI:1890169]
Gm15893	-0.203	1.88	3.87	0.000307	0.0087	2.01	4.02	predicted gene 15893 [Source:MGI Symbol;Acc:MGI:3801832]
Whsc1	6.53	7.07	3.87	0.000307	0.0087	0.522	1.44	Wolf-Hirschhorn syndrome candidate 1 (human) [Source:MGI Symbol;Acc:MGI:1276574]
Tmem80	4.95	4.61	-3.87	0.000307	0.0087	-0.48	-1.39	transmembrane protein 80 [Source:MGI Symbol;Acc:MGI:1918698]
Dpysl4	5.87	5.39	-3.87	0.000308	0.0087	-0.533	-1.45	dihydropyrimidinase-like 4 [Source:MGI Symbol;Acc:MGI:1349764]
Ptger1	3.77	3.17	-3.87	0.000308	0.0087	-0.679	-1.6	prostaglandin E receptor 1 (subtype EP1) [Source:MGI Symbol;Acc:MGI:97793]
Zfp445	4.71	5.98	3.87	0.000309	0.0087	1.03	2.04	zinc finger protein 445 [Source:MGI Symbol;Acc:MGI:2143340]
Usp32	7.18	7.79	3.87	0.000311	0.00872	0.621	1.54	ubiquitin specific peptidase 32 [Source:MGI Symbol;Acc:MGI:2144475]
Pik3r3	5.66	6.12	3.87	0.000311	0.00872	0.452	1.37	phosphatidylinositol 3 kinase, regulatory subunit, polypeptide 3 (p55) [Source:MGI Symbol;Acc:MGI:109277]
Cdk5rap3	5.35	4.65	-3.87	0.000311	0.00872	-0.765	-1.7	CDK5 regulatory subunit associated protein 3 [Source:MGI Symbol;Acc:MGI:1933126]
D630036G22Rik	-1.92	0.674	3.87	0.000313	0.00874	2.76	6.77	RIKEN cDNA D630036G22 gene [Source:MGI Symbol;Acc:MGI:3045265]
Larp4	5.25	6.03	3.87	0.000313	0.00874	0.959	1.94	La ribonucleoprotein domain family, member 4 [Source:MGI Symbol;Acc:MGI:2443114]
Pgam5	3.11	2.71	-3.87	0.000313	0.00874	-0.875	-1.83	phosphoglycerate mutase family member 5 [Source:MGI Symbol;Acc:MGI:1919792]
Col19a1	1.67	3.35	3.87	0.000314	0.00874	1.47	2.76	collagen, type XIX, alpha 1 [Source:MGI Symbol;Acc:MGI:1095415]
Gm22009	1.79	2.87	3.87	0.000316	0.00878	2.27	4.81	predicted gene, 22009 [Source:MGI Symbol;Acc:MGI:5451786]
Mrpl38	4.86	4.25	-3.86	0.000316	0.00878	-0.868	-1.83	mitochondrial ribosomal protein L38 [Source:MGI Symbol;Acc:MGI:1926269]
Clcn3	7.76	8.25	3.86	0.000318	0.00878	0.548	1.46	chloride channel, voltage-sensitive 3 [Source:MGI Symbol;Acc:MGI:103555]
Lrrcc1	5.41	5.91	3.86	0.000319	0.00878	0.684	1.61	leucine rich repeat and coiled-coil domain containing 1 [Source:MGI Symbol;Acc:MGI:1918960]
Klf8	2.5	3.4	3.86	0.000319	0.00878	0.95	1.93	Kruppel-like factor 8 [Source:MGI Symbol;Acc:MGI:2442430]
Dgcr14	4.24	3.76	-3.86	0.000319	0.00878	-0.606	-1.52	DiGeorge syndrome critical region gene 14 [Source:MGI Symbol;Acc:MGI:107854]
Spred1	7.56	8.18	3.86	0.000319	0.00878	0.645	1.56	sprouty protein with EVH-1 domain 1, related sequence [Source:MGI Symbol;Acc:MGI:2150016]
6430511E19Rik	1.47	2.5	3.86	0.000319	0.00878	1.29	2.44	RIKEN cDNA 6430511E19 gene [Source:MGI Symbol;Acc:MGI:2443259]
Ppp1r12c	6.98	6.39	-3.86	0.000322	0.00885	-0.68	-1.6	protein phosphatase 1, regulatory (inhibitor) subunit 12C [Source:MGI Symbol;Acc:MGI:1924258]
Tfdp2	4.94	5.51	3.86	0.000325	0.00892	0.658	1.58	transcription factor Dp 2 [Source:MGI Symbol;Acc:MGI:107167]
Cttn	6.96	6.66	-3.86	0.000326	0.00892	-0.409	-1.33	cortactin [Source:MGI Symbol;Acc:MGI:99695]
Ehmt2	8.04	7.5	-3.85	0.000327	0.00892	-0.652	-1.57	euchromatic histone lysine N-methyltransferase 2 [Source:MGI Symbol;Acc:MGI:2148922]
Skiv2l	6.7	6.21	-3.85	0.000327	0.00892	-0.533	-1.45	superkiller viralicidic activity 2-like (S. cerevisiae) [Source:MGI Symbol;Acc:MGI:1099835]
Pomgnt2	5.64	4.93	-3.85	0.000327	0.00892	-0.822	-1.77	protein O-linked mannose beta 1,4-N-acetylglucosaminyltransferase 2 [Source:MGI Symbol;Acc:MGI:2143424]
Arhgef40	6.47	6.02	-3.85	0.000328	0.00892	-0.536	-1.45	Rho guanine nucleotide exchange factor (GEF) 40 [Source:MGI Symbol;Acc:MGI:2685515]
Pik3c2a	5.32	6.03	3.85	0.000328	0.00892	0.789	1.73	phosphatidylinositol 3-kinase, C2 domain containing, alpha polypeptide [Source:MGI Symbol;Acc:MGI:1203729]
Gm16185	1.89	3.92	3.85	0.000329	0.00893	1.78	3.44	predicted gene 16185 [Source:MGI Symbol;Acc:MGI:3802169]
Bmpr1a	6.08	6.67	3.85	0.000332	0.00898	0.595	1.51	bone morphogenetic protein receptor, type 1A [Source:MGI Symbol;Acc:MGI:1338938]
Prkag1	4.92	4.21	-3.85	0.000333	0.00898	-0.789	-1.73	protein kinase, AMP-activated, gamma 1 non-catalytic subunit [Source:MGI Symbol;Acc:MGI:108411]
Sap130	5.45	5	-3.85	0.000333	0.00898	-0.463	-1.38	Sin3A associated protein [Source:MGI Symbol;Acc:MGI:1919782]
Gm1976	3.06	3.77	3.85	0.000333	0.00898	0.884	1.85	predicted gene 1976 [Source:MGI Symbol;Acc:MGI:3780145]
Egln2	5.49	4.75	-3.85	0.000334	0.00899	-0.82	-1.76	egl-9 family hypoxia-inducible factor 2 [Source:MGI Symbol;Acc:MGI:1932287]
Wrn	3.69	4.38	3.84	0.000337	0.009	0.713	1.64	Werner syndrome homolog (human) [Source:MGI Symbol;Acc:MGI:109635]
Mybbp1a	6.34	6.01	-3.84	0.000337	0.009	-0.459	-1.37	MYB binding protein (P160) 1a [Source:MGI Symbol;Acc:MGI:106181]
Ilf3	6.63	6.3	-3.84	0.000337	0.009	-0.433	-1.35	interleukin enhancer binding factor 3 [Source:MGI Symbol;Acc:MGI:1339973]
Prr12	6.48	5.98	-3.84	0.000338	0.009	-0.567	-1.48	proline rich 12 [Source:MGI Symbol;Acc:MGI:2679002]
Nrcam	7.61	8.1	3.84	0.000339	0.009	0.526	1.44	neuronal cell adhesion molecule [Source:MGI Symbol;Acc:MGI:104750]
Trip11	5.61	6.29	3.84	0.000339	0.009	0.709	1.63	thyroid hormone receptor interactor 11 [Source:MGI Symbol;Acc:MGI:1924393]
Zfp804b	-2.77	-0.0275	3.84	0.000339	0.009	2.93	7.63	zinc finger protein 804B [Source:MGI Symbol;Acc:MGI:2685287]
Rab34	4.2	3.43	-3.84	0.000339	0.009	-0.927	-1.9	RAB34, member RAS oncogene family [Source:MGI Symbol;Acc:MGI:104606]
Galnt13	5.48	6.21	3.84	0.00034	0.009	0.789	1.73	UDP-N-acetyl-alpha-D-galactosamine:polypeptide N-acetylgalactosaminyltransferase 13 [Source:MGI Symbol;Acc:MGI:2139447]
Nup160	3.9	4.48	3.84	0.000341	0.009	0.719	1.65	nucleoporin 160 [Source:MGI Symbol;Acc:MGI:1926227]
Fam193b	6.75	6.22	-3.84	0.000341	0.009	-0.637	-1.56	family with sequence similarity 193, member B [Source:MGI Symbol;Acc:MGI:2385851]
Tceal5	4.18	3.36	-3.84	0.000341	0.009	-0.963	-1.95	transcription elongation factor A (SII)-like 5 [Source:MGI Symbol;Acc:MGI:3036236]
Dicer1	6.38	7	3.84	0.000342	0.009	0.585	1.5	dicer 1, ribonuclease type III [Source:MGI Symbol;Acc:MGI:2177178]
Mbnl1	6.38	6.98	3.84	0.000342	0.009	0.708	1.63	muscleblind-like 1 (Drosophila) [Source:MGI Symbol;Acc:MGI:1928482]
Gramd1a	7.16	6.74	-3.84	0.000343	0.009	-0.539	-1.45	GRAM domain containing 1A [Source:MGI Symbol;Acc:MGI:105490]
Usp19	7.72	7.37	-3.84	0.000343	0.009	-0.46	-1.38	ubiquitin specific peptidase 19 [Source:MGI Symbol;Acc:MGI:1918722]
Sart3	5.79	5.38	-3.84	0.000344	0.00901	-0.49	-1.4	squamous cell carcinoma antigen recognized by T cells 3 [Source:MGI Symbol;Acc:MGI:1858230]
Ngrn	4.39	3.77	-3.84	0.000344	0.00901	-0.86	-1.81	neugrin, neurite outgrowth associated [Source:MGI Symbol;Acc:MGI:1933212]
Ampd2	6.74	6.29	-3.84	0.000345	0.00901	-0.555	-1.47	adenosine monophosphate deaminase 2 [Source:MGI Symbol;Acc:MGI:88016]
Atp13a3	5.97	6.73	3.83	0.000348	0.00906	0.86	1.82	ATPase type 13A3 [Source:MGI Symbol;Acc:MGI:2685387]
Hps1	5.19	4.9	-3.83	0.000348	0.00906	-0.437	-1.35	Hermansky-Pudlak syndrome 1 homolog (human) [Source:MGI Symbol;Acc:MGI:2177763]
Mtg1	4.1	3.53	-3.83	0.000348	0.00906	-0.683	-1.61	mitochondrial GTPase 1 homolog (S. cerevisiae) [Source:MGI Symbol;Acc:MGI:2685015]
Nucb1	6.44	5.89	-3.83	0.000349	0.00906	-0.657	-1.58	nucleobindin 1 [Source:MGI Symbol;Acc:MGI:97388]
Caskin1	7.51	7.12	-3.83	0.000352	0.00913	-0.565	-1.48	CASK interacting protein 1 [Source:MGI Symbol;Acc:MGI:2442952]
Nagk	4.99	4.4	-3.83	0.000353	0.00913	-0.584	-1.5	N-acetylglucosamine kinase [Source:MGI Symbol;Acc:MGI:1860418]
Atp13a1	6.37	5.92	-3.83	0.000353	0.00913	-0.546	-1.46	ATPase type 13A1 [Source:MGI Symbol;Acc:MGI:2180801]
Trp53inp2	7.22	7.71	3.83	0.000353	0.00913	0.542	1.46	transformation related protein 53 inducible nuclear protein 2 [Source:MGI Symbol;Acc:MGI:1915978]
Vps72	4.39	3.75	-3.83	0.000354	0.00913	-0.874	-1.83	vacuolar protein sorting 72 (yeast) [Source:MGI Symbol;Acc:MGI:1202305]
Timm50	4.79	4.18	-3.83	0.000354	0.00913	-0.806	-1.75	translocase of inner mitochondrial membrane 50 [Source:MGI Symbol;Acc:MGI:1913775]
Col2a1	3.08	2.46	-3.83	0.000355	0.00914	-0.877	-1.84	collagen, type II, alpha 1 [Source:MGI Symbol;Acc:MGI:88452]
Efnb1	3.81	3.22	-3.83	0.000357	0.00915	-0.726	-1.65	ephrin B1 [Source:MGI Symbol;Acc:MGI:102708]
Xrcc1	3.89	3.28	-3.82	0.000359	0.00915	-0.83	-1.78	X-ray repair complementing defective repair in Chinese hamster cells 1 [Source:MGI Symbol;Acc:MGI:99137]
Zscan25	3.59	3.09	-3.82	0.000359	0.00915	-0.668	-1.59	zinc finger and SCAN domain containing 25 [Source:MGI Symbol;Acc:MGI:3647079]
Tbc1d15	5.35	5.83	3.82	0.00036	0.00915	0.596	1.51	TBC1 domain family, member 15 [Source:MGI Symbol;Acc:MGI:1913937]
Ino80d	4.89	5.8	3.82	0.00036	0.00915	0.878	1.84	INO80 complex subunit D [Source:MGI Symbol;Acc:MGI:3027003]
Zkscan3	5.51	5.99	3.82	0.000361	0.00915	0.609	1.53	zinc finger with KRAB and SCAN domains 3 [Source:MGI Symbol;Acc:MGI:1919989]
Cdh4	6.1	5.37	-3.82	0.000362	0.00915	-0.68	-1.6	cadherin 4 [Source:MGI Symbol;Acc:MGI:99218]
Vps26a	5.65	6.11	3.82	0.000363	0.00915	0.604	1.52	vacuolar protein sorting 26 homolog A (yeast) [Source:MGI Symbol;Acc:MGI:1353654]
Cep170	6.44	7.04	3.82	0.000363	0.00915	0.563	1.48	centrosomal protein 170 [Source:MGI Symbol;Acc:MGI:1918348]
Ddx27	4.66	4.2	-3.82	0.000363	0.00915	-0.63	-1.55	DEAD (Asp-Glu-Ala-Asp) box polypeptide 27 [Source:MGI Symbol;Acc:MGI:2385884]
Cep97	4.62	5.19	3.82	0.000364	0.00915	0.656	1.58	centrosomal protein 97 [Source:MGI Symbol;Acc:MGI:1921451]
Mir1898	-0.716	0.928	3.82	0.000364	0.00915	2.23	4.69	microRNA 1898 [Source:MGI Symbol;Acc:MGI:3811421]
Tysnd1	3.53	2.78	-3.82	0.000364	0.00915	-0.859	-1.81	trypsin domain containing 1 [Source:MGI Symbol;Acc:MGI:1919017]
Podxl2	7.43	6.77	-3.82	0.000365	0.00915	-0.823	-1.77	podocalyxin-like 2 [Source:MGI Symbol;Acc:MGI:2442488]
Spty2d1	4.8	5.16	3.82	0.000365	0.00915	0.669	1.59	SPT2, Suppressor of Ty, domain containing 1 (S. cerevisiae) [Source:MGI Symbol;Acc:MGI:2142062]
Polr1c	4.52	3.95	-3.82	0.000366	0.00915	-0.608	-1.52	polymerase (RNA) I polypeptide C [Source:MGI Symbol;Acc:MGI:103288]
Ap3d1	7.74	7.35	-3.82	0.000366	0.00915	-0.481	-1.4	adaptor-related protein complex 3, delta 1 subunit [Source:MGI Symbol;Acc:MGI:107734]
Cdc37l1	6.19	6.73	3.82	0.000367	0.00915	0.537	1.45	cell division cycle 37-like 1 [Source:MGI Symbol;Acc:MGI:1914322]
Lzts3	6.66	6.23	-3.82	0.000367	0.00915	-0.553	-1.47	leucine zipper, putative tumor suppressor family member 3 [Source:MGI Symbol;Acc:MGI:2656976]
Uba3	6.27	6.67	3.82	0.000368	0.00915	0.51	1.42	ubiquitin-like modifier activating enzyme 3 [Source:MGI Symbol;Acc:MGI:1341217]
Bmp2k	4.07	4.66	3.82	0.000368	0.00915	0.637	1.56	BMP2 inducible kinase [Source:MGI Symbol;Acc:MGI:2155456]
Psmb5	4.5	3.71	-3.82	0.000368	0.00915	-1.04	-2.05	proteasome (prosome, macropain) subunit, beta type 5 [Source:MGI Symbol;Acc:MGI:1194513]
Zmiz2	7.15	6.7	-3.82	0.000368	0.00915	-0.543	-1.46	zinc finger, MIZ-type containing 2 [Source:MGI Symbol;Acc:MGI:106374]
Zer1	8.03	7.71	-3.82	0.000368	0.00915	-0.461	-1.38	zyg-11 related, cell cycle regulator [Source:MGI Symbol;Acc:MGI:2442511]
Mta1	5.16	4.7	-3.82	0.000368	0.00915	-0.591	-1.51	metastasis associated 1 [Source:MGI Symbol;Acc:MGI:2150037]
Ell	4.36	3.77	-3.81	0.00037	0.00918	-0.697	-1.62	elongation factor RNA polymerase II [Source:MGI Symbol;Acc:MGI:109377]
Pnck	7.46	6.72	-3.81	0.000371	0.00919	-0.76	-1.69	pregnancy upregulated non-ubiquitously expressed CaM kinase [Source:MGI Symbol;Acc:MGI:1347357]
Dock4	6.03	6.86	3.81	0.000372	0.0092	0.787	1.72	dedicator of cytokinesis 4 [Source:MGI Symbol;Acc:MGI:1918006]
Evl	5.85	5.31	-3.81	0.000373	0.0092	-0.712	-1.64	Ena-vasodilator stimulated phosphoprotein [Source:MGI Symbol;Acc:MGI:1194884]
Rrp1	7.43	6.77	-3.81	0.000374	0.00921	-0.764	-1.7	ribosomal RNA processing 1 homolog (S. cerevisiae) [Source:MGI Symbol;Acc:MGI:1203500]
Ccnt1	5.86	6.26	3.81	0.000374	0.00921	0.552	1.47	cyclin T1 [Source:MGI Symbol;Acc:MGI:1328363]
Gk5	1.67	2.52	3.81	0.000375	0.00921	0.912	1.88	glycerol kinase 5 (putative) [Source:MGI Symbol;Acc:MGI:2443336]
Ncapg2	2.33	3.21	3.81	0.000375	0.00922	0.81	1.75	non-SMC condensin II complex, subunit G2 [Source:MGI Symbol;Acc:MGI:1923294]
Rps6kl1	5.46	4.94	-3.81	0.000376	0.00923	-0.538	-1.45	ribosomal protein S6 kinase-like 1 [Source:MGI Symbol;Acc:MGI:2443413]
Slc4a7	4.76	5.28	3.81	0.000377	0.00923	0.681	1.6	solute carrier family 4, sodium bicarbonate cotransporter, member 7 [Source:MGI Symbol;Acc:MGI:2443878]
Vps13d	6.91	7.63	3.81	0.000379	0.00924	0.613	1.53	vacuolar protein sorting 13 D (yeast) [Source:MGI Symbol;Acc:MGI:2448530]
Chmp7	6.86	6.41	-3.81	0.000379	0.00924	-0.457	-1.37	charged multivesicular body protein 7 [Source:MGI Symbol;Acc:MGI:1913922]
Wash1	5.24	4.68	-3.81	0.000379	0.00924	-0.604	-1.52	WAS protein family homolog 1 [Source:MGI Symbol;Acc:MGI:1916017]
Odf3b	1.27	-0.283	-3.81	0.000379	0.00924	-1.84	-3.58	outer dense fiber of sperm tails 3B [Source:MGI Symbol;Acc:MGI:1917363]
Lrp1b	5.75	6.59	3.81	0.000382	0.00928	0.791	1.73	low density lipoprotein-related protein 1B (deleted in tumors) [Source:MGI Symbol;Acc:MGI:2151136]
A730017L22Rik	2.2	3.2	3.8	0.000384	0.00933	0.77	1.7	RIKEN cDNA A730017L22 gene [Source:MGI Symbol;Acc:MGI:3584452]
Scn3a	6.3	7.01	3.8	0.000389	0.00943	0.789	1.73	sodium channel, voltage-gated, type III, alpha [Source:MGI Symbol;Acc:MGI:98249]
Plcxd2	6.62	7.3	3.8	0.00039	0.00943	0.657	1.58	phosphatidylinositol-specific phospholipase C, X domain containing 2 [Source:MGI Symbol;Acc:MGI:3647874]
Actr2	8.2	8.68	3.8	0.000391	0.00946	0.576	1.49	ARP2 actin-related protein 2 [Source:MGI Symbol;Acc:MGI:1913963]
Zfp26	3.92	4.94	3.8	0.000393	0.00949	0.952	1.94	zinc finger protein 26 [Source:MGI Symbol;Acc:MGI:99173]
Phb2	4.6	3.93	-3.79	0.000395	0.00952	-0.857	-1.81	prohibitin 2 [Source:MGI Symbol;Acc:MGI:102520]
Katnb1	5.66	5.09	-3.79	0.000396	0.00954	-0.675	-1.6	katanin p80 (WD40-containing) subunit B 1 [Source:MGI Symbol;Acc:MGI:1921437]
Acap2	5.9	6.5	3.79	0.000397	0.00954	0.617	1.53	ArfGAP with coiled-coil, ankyrin repeat and PH domains 2 [Source:MGI Symbol;Acc:MGI:1925868]
Rc3h2	6.26	7.07	3.79	0.000398	0.00956	0.906	1.87	ring finger and CCCH-type zinc finger domains 2 [Source:MGI Symbol;Acc:MGI:2442789]
Camsap2	7.44	7.86	3.79	0.000399	0.00956	0.534	1.45	calmodulin regulated spectrin-associated protein family, member 2 [Source:MGI Symbol;Acc:MGI:1922434]
Prrt4	3.47	2.82	-3.79	0.0004	0.00958	-0.881	-1.84	proline-rich transmembrane protein 4 [Source:MGI Symbol;Acc:MGI:2141677]
Gm17024	0.495	1.92	3.79	0.000402	0.00962	1.33	2.51	predicted gene 17024 [Source:MGI Symbol;Acc:MGI:4937851]
Reps2	7.18	7.95	3.79	0.000404	0.00963	0.948	1.93	RALBP1 associated Eps domain containing protein 2 [Source:MGI Symbol;Acc:MGI:2663511]
Bex2	7.53	6.68	-3.79	0.000404	0.00963	-0.905	-1.87	brain expressed X-linked 2 [Source:MGI Symbol;Acc:MGI:1338017]
Pdyn	6.08	4.6	-3.79	0.000404	0.00963	-1.27	-2.4	prodynorphin [Source:MGI Symbol;Acc:MGI:97535]
Zfp219	5.39	4.75	-3.78	0.000407	0.00969	-0.77	-1.7	zinc finger protein 219 [Source:MGI Symbol;Acc:MGI:1917140]
Avp	6.95	2.14	-3.78	0.000409	0.00972	-3.67	-12.8	arginine vasopressin [Source:MGI Symbol;Acc:MGI:88121]
Dcaf15	4.85	4.28	-3.78	0.00041	0.00972	-0.642	-1.56	DDB1 and CUL4 associated factor 15 [Source:MGI Symbol;Acc:MGI:2684420]
Pcdhb21	0.377	2.06	3.78	0.000411	0.00972	1.58	2.98	protocadherin beta 21 [Source:MGI Symbol;Acc:MGI:2136759]
H13	6.55	6.15	-3.78	0.000411	0.00972	-0.46	-1.38	histocompatibility 13 [Source:MGI Symbol;Acc:MGI:95886]
Gm17567	-2.38	-0.287	3.78	0.000412	0.00973	2.63	6.17	predicted gene, 17567 [Source:MGI Symbol;Acc:MGI:4937201]
Gramd4	5.71	5.43	-3.78	0.000413	0.00974	-0.378	-1.3	GRAM domain containing 4 [Source:MGI Symbol;Acc:MGI:2676308]
Paf1	5.59	4.96	-3.78	0.000413	0.00974	-0.665	-1.59	Paf1, RNA polymerase II associated factor, homolog (S. cerevisiae) [Source:MGI Symbol;Acc:MGI:1923988]
Lrrtm2	5.55	6.14	3.78	0.000415	0.00974	0.646	1.56	leucine rich repeat transmembrane neuronal 2 [Source:MGI Symbol;Acc:MGI:2389174]
Pdp1	6.35	6.92	3.78	0.000415	0.00974	0.798	1.74	pyruvate dehyrogenase phosphatase catalytic subunit 1 [Source:MGI Symbol;Acc:MGI:2685870]
Srpk2	7.48	7.85	3.78	0.000415	0.00974	0.415	1.33	serine/arginine-rich protein specific kinase 2 [Source:MGI Symbol;Acc:MGI:1201408]
Ugt8a	4.5	5.32	3.78	0.000417	0.00977	0.835	1.78	UDP galactosyltransferase 8A [Source:MGI Symbol;Acc:MGI:109522]
Unc13c	5.89	7.06	3.78	0.000419	0.0098	1.19	2.28	unc-13 homolog C (C. elegans) [Source:MGI Symbol;Acc:MGI:2149021]
Gpr158	6.76	7.36	3.77	0.000421	0.00984	0.578	1.49	G protein-coupled receptor 158 [Source:MGI Symbol;Acc:MGI:2441697]
Plxdc1	4.56	3.99	-3.77	0.000423	0.00986	-0.644	-1.56	plexin domain containing 1 [Source:MGI Symbol;Acc:MGI:1919574]
Matk	7.13	6.26	-3.77	0.000423	0.00986	-0.98	-1.97	megakaryocyte-associated tyrosine kinase [Source:MGI Symbol;Acc:MGI:99259]
Mc3r	3.56	2.27	-3.77	0.000425	0.00988	-1.13	-2.18	melanocortin 3 receptor [Source:MGI Symbol;Acc:MGI:96929]
Ankrd39	3.51	3.08	-3.77	0.000425	0.00988	-0.689	-1.61	ankyrin repeat domain 39 [Source:MGI Symbol;Acc:MGI:1914816]
Tulp4	7	7.62	3.77	0.000426	0.00988	0.577	1.49	tubby like protein 4 [Source:MGI Symbol;Acc:MGI:1916092]
Gtpbp2	6.12	5.77	-3.77	0.000426	0.00988	-0.488	-1.4	GTP binding protein 2 [Source:MGI Symbol;Acc:MGI:1860138]
Atf7ip	6.52	7.01	3.77	0.000427	0.00989	0.473	1.39	activating transcription factor 7 interacting protein [Source:MGI Symbol;Acc:MGI:1858965]
Ap3b2	8.18	7.75	-3.77	0.000428	0.00989	-0.486	-1.4	adaptor-related protein complex 3, beta 2 subunit [Source:MGI Symbol;Acc:MGI:1100869]
Gabra1	8.75	9.55	3.77	0.000428	0.00989	0.876	1.83	gamma-aminobutyric acid (GABA) A receptor, subunit alpha 1 [Source:MGI Symbol;Acc:MGI:95613]
Qpctl	4.28	3.83	-3.77	0.000431	0.00995	-0.504	-1.42	glutaminyl-peptide cyclotransferase-like [Source:MGI Symbol;Acc:MGI:1914619]
Eefsec	3.47	2.84	-3.77	0.000432	0.00997	-0.67	-1.59	eukaryotic elongation factor, selenocysteine-tRNA-specific [Source:MGI Symbol;Acc:MGI:2137092]
Gm43668	3.66	4.22	3.76	0.000433	0.00997	0.698	1.62	predicted gene 43668 [Source:MGI Symbol;Acc:MGI:5663805]
Rab30	2.59	3.68	3.76	0.000435	0.00997	1.23	2.34	RAB30, member RAS oncogene family [Source:MGI Symbol;Acc:MGI:1923235]
Tmem134	0.309	-1.1	-3.76	0.000436	0.00997	-1.64	-3.13	transmembrane protein 134 [Source:MGI Symbol;Acc:MGI:1914240]
Pak4	6.21	5.82	-3.76	0.000437	0.00997	-0.397	-1.32	p21 protein (Cdc42/Rac)-activated kinase 4 [Source:MGI Symbol;Acc:MGI:1917834]
Fsd1l	5.89	6.62	3.76	0.000437	0.00997	0.8	1.74	fibronectin type III and SPRY domain containing 1-like [Source:MGI Symbol;Acc:MGI:2442443]
Rfx1	5.37	4.85	-3.76	0.000438	0.00997	-0.561	-1.47	regulatory factor X, 1 (influences HLA class II expression) [Source:MGI Symbol;Acc:MGI:105982]
Gmppa	4.57	4.2	-3.76	0.000438	0.00997	-0.554	-1.47	GDP-mannose pyrophosphorylase A [Source:MGI Symbol;Acc:MGI:1916330]
Gm42798	0.251	1.29	3.76	0.000438	0.00997	1.63	3.1	predicted gene 42798 [Source:MGI Symbol;Acc:MGI:5662935]
Nudt8	1.95	0.949	-3.76	0.000439	0.00997	-1.17	-2.24	nudix (nucleoside diphosphate linked moiety X)-type motif 8 [Source:MGI Symbol;Acc:MGI:1913637]
Zfp101	2.52	3.29	3.76	0.000439	0.00997	0.676	1.6	zinc finger protein 101 [Source:MGI Symbol;Acc:MGI:107547]
Cpne3	4.17	4.86	3.76	0.000439	0.00997	0.896	1.86	copine III [Source:MGI Symbol;Acc:MGI:1917818]
Fxr2	7.14	6.72	-3.76	0.00044	0.00997	-0.478	-1.39	fragile X mental retardation, autosomal homolog 2 [Source:MGI Symbol;Acc:MGI:1346074]
Zbtb33	4.83	5.48	3.76	0.00044	0.00997	0.779	1.72	zinc finger and BTB domain containing 33 [Source:MGI Symbol;Acc:MGI:1927290]
Kcnn3	5.48	6.16	3.76	0.00044	0.00997	0.701	1.63	potassium intermediate/small conductance calcium-activated channel, subfamily N, member 3 [Source:MGI Symbol;Acc:MGI:2153183]
Col5a3	3.99	3.37	-3.76	0.000443	0.01	-0.856	-1.81	collagen, type V, alpha 3 [Source:MGI Symbol;Acc:MGI:1858212]
Usp37	5.27	5.64	3.76	0.000444	0.01	0.497	1.41	ubiquitin specific peptidase 37 [Source:MGI Symbol;Acc:MGI:2442483]
Rrnad1	5.56	5.1	-3.76	0.000445	0.01	-0.462	-1.38	ribosomal RNA adenine dimethylase domain containing 1 [Source:MGI Symbol;Acc:MGI:2387197]
Rnf215	5.24	4.72	-3.76	0.000446	0.01	-0.677	-1.6	ring finger protein 215 [Source:MGI Symbol;Acc:MGI:1918923]
Rapgef5	4.3	5.2	3.75	0.000447	0.01	0.786	1.72	Rap guanine nucleotide exchange factor (GEF) 5 [Source:MGI Symbol;Acc:MGI:2444365]
Cript	5.85	6.29	3.75	0.00045	0.0101	0.613	1.53	cysteine-rich PDZ-binding protein [Source:MGI Symbol;Acc:MGI:1929655]
Npr2	6.4	6.09	-3.75	0.00045	0.0101	-0.404	-1.32	natriuretic peptide receptor 2 [Source:MGI Symbol;Acc:MGI:97372]
Rnf166	3.87	3.26	-3.75	0.000451	0.0101	-0.84	-1.79	ring finger protein 166 [Source:MGI Symbol;Acc:MGI:1915968]
Rmnd5a	6.92	7.38	3.75	0.000451	0.0101	0.484	1.4	required for meiotic nuclear division 5 homolog A (S. cerevisiae) [Source:MGI Symbol;Acc:MGI:1915727]
Dgcr2	7.3	6.87	-3.75	0.000453	0.0101	-0.411	-1.33	DiGeorge syndrome critical region gene 2 [Source:MGI Symbol;Acc:MGI:892866]
Arfgap1	6.37	5.97	-3.75	0.000454	0.0101	-0.531	-1.44	ADP-ribosylation factor GTPase activating protein 1 [Source:MGI Symbol;Acc:MGI:2183559]
Ccdc85c	3.69	3.16	-3.75	0.000455	0.0101	-0.919	-1.89	coiled-coil domain containing 85C [Source:MGI Symbol;Acc:MGI:3644008]
Utp20	4.9	5.47	3.75	0.000455	0.0101	0.586	1.5	UTP20, small subunit (SSU) processome component, homolog (yeast) [Source:MGI Symbol;Acc:MGI:1917933]
Ipo11	5.44	5.9	3.75	0.000455	0.0101	0.614	1.53	importin 11 [Source:MGI Symbol;Acc:MGI:2442377]
Akap11	7.85	8.48	3.75	0.000456	0.0101	0.711	1.64	A kinase (PRKA) anchor protein 11 [Source:MGI Symbol;Acc:MGI:2684060]
Lrp6	5.73	6.38	3.75	0.000456	0.0101	0.617	1.53	low density lipoprotein receptor-related protein 6 [Source:MGI Symbol;Acc:MGI:1298218]
Erp29	6.21	5.46	-3.75	0.000456	0.0101	-0.766	-1.7	endoplasmic reticulum protein 29 [Source:MGI Symbol;Acc:MGI:1914647]
Wbp2	7.53	7.04	-3.75	0.000457	0.0101	-0.591	-1.51	WW domain binding protein 2 [Source:MGI Symbol;Acc:MGI:104709]
Gm26823	0.81	2.58	3.74	0.000462	0.0102	1.9	3.73	predicted gene, 26823 [Source:MGI Symbol;Acc:MGI:5477317]
Rbfox3	6.61	5.89	-3.74	0.000463	0.0102	-0.854	-1.81	RNA binding protein, fox-1 homolog (C. elegans) 3 [Source:MGI Symbol;Acc:MGI:106368]
Mtmr10	4.31	4.93	3.74	0.000466	0.0103	0.633	1.55	myotubularin related protein 10 [Source:MGI Symbol;Acc:MGI:2142292]
1700080N15Rik	-0.824	1.19	3.74	0.000468	0.0103	2.28	4.87	RIKEN cDNA 1700080N15 gene [Source:MGI Symbol;Acc:MGI:1920739]
Ablim3	5.93	5.53	-3.74	0.00047	0.0103	-0.46	-1.38	actin binding LIM protein family, member 3 [Source:MGI Symbol;Acc:MGI:2442582]
AW549877	6.44	7.1	3.74	0.000472	0.0104	0.656	1.58	expressed sequence AW549877 [Source:MGI Symbol;Acc:MGI:2146232]
Fbxl19	5.96	5.48	-3.74	0.000473	0.0104	-0.593	-1.51	F-box and leucine-rich repeat protein 19 [Source:MGI Symbol;Acc:MGI:3039600]
Nek1	5.78	6.33	3.74	0.000474	0.0104	0.543	1.46	NIMA (never in mitosis gene a)-related expressed kinase 1 [Source:MGI Symbol;Acc:MGI:97303]
Gdap1l1	6.4	5.79	-3.74	0.000474	0.0104	-0.628	-1.55	ganglioside-induced differentiation-associated protein 1-like 1 [Source:MGI Symbol;Acc:MGI:2385163]
Pgap2	3.48	2.89	-3.74	0.000474	0.0104	-0.64	-1.56	post-GPI attachment to proteins 2 [Source:MGI Symbol;Acc:MGI:2385286]
Snx13	6.03	6.57	3.73	0.000475	0.0104	0.678	1.6	sorting nexin 13 [Source:MGI Symbol;Acc:MGI:2661416]
0610010F05Rik	5.84	6.33	3.73	0.000478	0.0104	0.535	1.45	RIKEN cDNA 0610010F05 gene [Source:MGI Symbol;Acc:MGI:1918925]
Tbl1xr1	6.08	6.59	3.73	0.000479	0.0104	0.581	1.5	transducin (beta)-like 1X-linked receptor 1 [Source:MGI Symbol;Acc:MGI:2441730]
Cep290	3.72	4.65	3.73	0.000479	0.0104	0.952	1.93	centrosomal protein 290 [Source:MGI Symbol;Acc:MGI:2384917]
Aspa	4.1	4.91	3.73	0.000481	0.0104	0.981	1.97	aspartoacylase [Source:MGI Symbol;Acc:MGI:87914]
Ikzf2	3.36	4.08	3.73	0.000482	0.0104	0.753	1.69	IKAROS family zinc finger 2 [Source:MGI Symbol;Acc:MGI:1342541]
Ctxn1	5.03	4.19	-3.73	0.000482	0.0104	-1.02	-2.03	cortexin 1 [Source:MGI Symbol;Acc:MGI:88566]
1810013L24Rik	6.14	6.51	3.73	0.000483	0.0104	0.484	1.4	RIKEN cDNA 1810013L24 gene [Source:MGI Symbol;Acc:MGI:1916303]
Sephs2	4.33	3.62	-3.73	0.000483	0.0104	-0.771	-1.71	selenophosphate synthetase 2 [Source:MGI Symbol;Acc:MGI:108388]
Efcab14	6.17	6.7	3.73	0.000485	0.0105	0.609	1.52	EF-hand calcium binding domain 14 [Source:MGI Symbol;Acc:MGI:2442397]
Nmt2	6.27	6.63	3.73	0.000486	0.0105	0.552	1.47	N-myristoyltransferase 2 [Source:MGI Symbol;Acc:MGI:1202298]
Lrrc39	-0.41	0.86	3.73	0.000486	0.0105	2.03	4.08	leucine rich repeat containing 39 [Source:MGI Symbol;Acc:MGI:1924557]
Rasal1	5.83	4.92	-3.72	0.000493	0.0106	-0.907	-1.88	RAS protein activator like 1 (GAP1 like) [Source:MGI Symbol;Acc:MGI:1330842]
Pex5l	6.1	6.82	3.72	0.000494	0.0106	0.587	1.5	peroxisomal biogenesis factor 5-like [Source:MGI Symbol;Acc:MGI:1916672]
Usp35	5.64	5.26	-3.72	0.000494	0.0106	-0.429	-1.35	ubiquitin specific peptidase 35 [Source:MGI Symbol;Acc:MGI:2685339]
Ikzf5	4.35	4.72	3.72	0.000494	0.0106	0.589	1.5	IKAROS family zinc finger 5 [Source:MGI Symbol;Acc:MGI:1914393]
U2surp	6.73	7.14	3.72	0.000495	0.0106	0.509	1.42	U2 snRNP-associated SURP domain containing [Source:MGI Symbol;Acc:MGI:1915208]
Wbscr16	3.98	3.27	-3.72	0.000495	0.0106	-0.686	-1.61	Williams-Beuren syndrome chromosome region 16 homolog (human) [Source:MGI Symbol;Acc:MGI:2137600]
Tcf3	4.74	4.25	-3.72	0.000496	0.0106	-0.572	-1.49	transcription factor 3 [Source:MGI Symbol;Acc:MGI:98510]
Zfp560	3.28	3.73	3.72	0.000497	0.0106	0.63	1.55	zinc finger protein 560 [Source:MGI Symbol;Acc:MGI:1915280]
Stxbp6	5.68	6.31	3.72	0.000498	0.0106	0.778	1.71	syntaxin binding protein 6 (amisyn) [Source:MGI Symbol;Acc:MGI:2384963]
Crat	4.9	4.44	-3.72	0.000499	0.0106	-0.617	-1.53	carnitine acetyltransferase [Source:MGI Symbol;Acc:MGI:109501]
Gm15608	-1.5	-0.0879	3.72	0.0005	0.0106	1.88	3.67	predicted gene 15608 [Source:MGI Symbol;Acc:MGI:3801804]
Sptbn4	7.58	7.14	-3.72	0.0005	0.0106	-0.641	-1.56	spectrin beta, non-erythrocytic 4 [Source:MGI Symbol;Acc:MGI:1890574]
Btbd7	3.5	4.52	3.72	0.000501	0.0106	0.871	1.83	BTB (POZ) domain containing 7 [Source:MGI Symbol;Acc:MGI:1917858]
Unk	4.86	4.52	-3.72	0.000502	0.0106	-0.549	-1.46	unkempt homolog (Drosophila) [Source:MGI Symbol;Acc:MGI:2442456]
Fxyd6	7.53	6.68	-3.72	0.000503	0.0106	-0.923	-1.9	FXYD domain-containing ion transport regulator 6 [Source:MGI Symbol;Acc:MGI:1890226]
Vars	6.43	5.82	-3.72	0.000503	0.0106	-0.69	-1.61	valyl-tRNA synthetase [Source:MGI Symbol;Acc:MGI:90675]
Atp11c	4.01	4.96	3.72	0.000503	0.0106	0.936	1.91	ATPase, class VI, type 11C [Source:MGI Symbol;Acc:MGI:1859661]
U2af2	6.61	6.1	-3.72	0.000504	0.0106	-0.686	-1.61	U2 small nuclear ribonucleoprotein auxiliary factor (U2AF) 2 [Source:MGI Symbol;Acc:MGI:98886]
Uty	3.85	4.55	3.72	0.000504	0.0106	0.907	1.88	ubiquitously transcribed tetratricopeptide repeat gene, Y chromosome [Source:MGI Symbol;Acc:MGI:894810]
Rgp1	5.35	4.97	-3.72	0.000504	0.0106	-0.532	-1.45	RGP1 retrograde golgi transport homolog (S. cerevisiae) [Source:MGI Symbol;Acc:MGI:1915956]
Rrm1	4.78	5.22	3.72	0.000505	0.0106	0.634	1.55	ribonucleotide reductase M1 [Source:MGI Symbol;Acc:MGI:98180]
Megf6	5.17	4.6	-3.71	0.000506	0.0106	-0.714	-1.64	multiple EGF-like-domains 6 [Source:MGI Symbol;Acc:MGI:1919351]
Nyap1	6.77	6.15	-3.71	0.000506	0.0106	-0.761	-1.69	neuronal tyrosine-phosphorylated phosphoinositide 3-kinase adaptor 1 [Source:MGI Symbol;Acc:MGI:2443880]
Arhgap29	3.67	4.47	3.71	0.000506	0.0106	0.846	1.8	Rho GTPase activating protein 29 [Source:MGI Symbol;Acc:MGI:2443818]
Atxn2l	7.36	7.09	-3.71	0.000507	0.0106	-0.438	-1.35	ataxin 2-like [Source:MGI Symbol;Acc:MGI:2446242]
Phrf1	5.89	5.5	-3.71	0.000508	0.0106	-0.508	-1.42	PHD and ring finger domains 1 [Source:MGI Symbol;Acc:MGI:2141847]
Trim33	6.19	6.56	3.71	0.00051	0.0106	0.522	1.44	tripartite motif-containing 33 [Source:MGI Symbol;Acc:MGI:2137357]
Zmym2	6.3	6.79	3.71	0.00051	0.0106	0.597	1.51	zinc finger, MYM-type 2 [Source:MGI Symbol;Acc:MGI:1923257]
Gna13	6.47	6.96	3.71	0.000512	0.0106	0.464	1.38	guanine nucleotide binding protein, alpha 13 [Source:MGI Symbol;Acc:MGI:95768]
Maz	6.21	5.74	-3.71	0.000513	0.0106	-0.537	-1.45	MYC-associated zinc finger protein (purine-binding transcription factor) [Source:MGI Symbol;Acc:MGI:1338823]
Galnt16	7.99	7.58	-3.71	0.000514	0.0106	-0.454	-1.37	UDP-N-acetyl-alpha-D-galactosamine:polypeptide N-acetylgalactosaminyltransferase 16 [Source:MGI Symbol;Acc:MGI:1917754]
Zdhhc18	5.08	4.59	-3.71	0.000515	0.0106	-0.644	-1.56	zinc finger, DHHC domain containing 18 [Source:MGI Symbol;Acc:MGI:3527792]
Tsga10	3.81	4.4	3.71	0.000515	0.0106	0.68	1.6	testis specific 10 [Source:MGI Symbol;Acc:MGI:2685063]
Ccdc157	5.99	5.44	-3.71	0.000515	0.0106	-0.582	-1.5	coiled-coil domain containing 157 [Source:MGI Symbol;Acc:MGI:3041210]
Nebl	6.61	7.16	3.71	0.000516	0.0106	0.603	1.52	nebulette [Source:MGI Symbol;Acc:MGI:1921353]
Pcm1	7.37	7.94	3.71	0.000516	0.0106	0.629	1.55	pericentriolar material 1 [Source:MGI Symbol;Acc:MGI:1277958]
Wdr46	3.42	2.62	-3.71	0.000517	0.0106	-0.955	-1.94	WD repeat domain 46 [Source:MGI Symbol;Acc:MGI:1931871]
Acaca	6.29	6.7	3.71	0.000518	0.0106	0.485	1.4	acetyl-Coenzyme A carboxylase alpha [Source:MGI Symbol;Acc:MGI:108451]
Tesk1	5.31	4.76	-3.71	0.000518	0.0106	-0.708	-1.63	testis specific protein kinase 1 [Source:MGI Symbol;Acc:MGI:1201675]
Tet1	3.2	4.05	3.71	0.000519	0.0106	0.812	1.76	tet methylcytosine dioxygenase 1 [Source:MGI Symbol;Acc:MGI:1098693]
Impad1	7.46	8.01	3.71	0.000519	0.0106	0.69	1.61	inositol monophosphatase domain containing 1 [Source:MGI Symbol;Acc:MGI:1915720]
Dusp19	3.84	4.37	3.71	0.000519	0.0106	0.67	1.59	dual specificity phosphatase 19 [Source:MGI Symbol;Acc:MGI:1915332]
Opa1	7.51	7.91	3.71	0.00052	0.0106	0.448	1.36	optic atrophy 1 [Source:MGI Symbol;Acc:MGI:1921393]
Nrg2	3.02	2.55	-3.71	0.00052	0.0106	-0.698	-1.62	neuregulin 2 [Source:MGI Symbol;Acc:MGI:1098246]
Wnk2	7.2	6.84	-3.71	0.000521	0.0106	-0.502	-1.42	WNK lysine deficient protein kinase 2 [Source:MGI Symbol;Acc:MGI:1922857]
Vcpip1	6.21	6.78	3.7	0.000522	0.0106	0.573	1.49	valosin containing protein (p97)/p47 complex interacting protein 1 [Source:MGI Symbol;Acc:MGI:1917925]
Gsk3b	8.42	8.96	3.7	0.000522	0.0106	0.619	1.54	glycogen synthase kinase 3 beta [Source:MGI Symbol;Acc:MGI:1861437]
Dguok	3.84	3.27	-3.7	0.000522	0.0106	-0.666	-1.59	deoxyguanosine kinase [Source:MGI Symbol;Acc:MGI:1351602]
Slk	5.71	6.17	3.7	0.000523	0.0106	0.515	1.43	STE20-like kinase [Source:MGI Symbol;Acc:MGI:103241]
AI314180	7.06	7.51	3.7	0.000524	0.0106	0.489	1.4	expressed sequence AI314180 [Source:MGI Symbol;Acc:MGI:2140220]
Map2	10.1	10.7	3.7	0.000524	0.0106	0.706	1.63	microtubule-associated protein 2 [Source:MGI Symbol;Acc:MGI:97175]
Phkb	5.66	6.15	3.7	0.000524	0.0106	0.525	1.44	phosphorylase kinase beta [Source:MGI Symbol;Acc:MGI:97578]
Rps3	7.46	6.72	-3.7	0.000527	0.0106	-0.708	-1.63	ribosomal protein S3 [Source:MGI Symbol;Acc:MGI:1350917]
Clk3	5.34	4.89	-3.7	0.000528	0.0106	-0.526	-1.44	CDC-like kinase 3 [Source:MGI Symbol;Acc:MGI:1098670]
Iws1	5.45	5.93	3.7	0.000528	0.0106	0.545	1.46	IWS1 homolog (S. cerevisiae) [Source:MGI Symbol;Acc:MGI:1920723]
Zfand1	4.35	4.83	3.7	0.000528	0.0106	0.524	1.44	zinc finger, AN1-type domain 1 [Source:MGI Symbol;Acc:MGI:1913611]
Entpd6	6.89	6.46	-3.7	0.000534	0.0107	-0.446	-1.36	ectonucleoside triphosphate diphosphohydrolase 6 [Source:MGI Symbol;Acc:MGI:1202295]
Ring1	5.49	4.83	-3.7	0.000535	0.0107	-0.713	-1.64	ring finger protein 1 [Source:MGI Symbol;Acc:MGI:1101770]
9330159F19Rik	7.05	7.5	3.7	0.000536	0.0108	0.523	1.44	RIKEN cDNA 9330159F19 gene [Source:MGI Symbol;Acc:MGI:3036239]
Eif4g1	8.48	8.07	-3.7	0.000537	0.0108	-0.455	-1.37	eukaryotic translation initiation factor 4, gamma 1 [Source:MGI Symbol;Acc:MGI:2384784]
Dyrk3	3.22	2.7	-3.69	0.000541	0.0108	-0.66	-1.58	dual-specificity tyrosine-(Y)-phosphorylation regulated kinase 3 [Source:MGI Symbol;Acc:MGI:1330300]
Fam210a	5.74	6.23	3.69	0.000541	0.0108	0.632	1.55	family with sequence similarity 210, member A [Source:MGI Symbol;Acc:MGI:1914000]
Pgs1	5.48	5.06	-3.69	0.000541	0.0108	-0.564	-1.48	phosphatidylglycerophosphate synthase 1 [Source:MGI Symbol;Acc:MGI:1921701]
Gm28119	-1.99	0.336	3.69	0.000547	0.0109	2.63	6.19	predicted gene 28119 [Source:MGI Symbol;Acc:MGI:5578825]
Vps37c	4.27	3.77	-3.69	0.000551	0.011	-0.592	-1.51	vacuolar protein sorting 37C (yeast) [Source:MGI Symbol;Acc:MGI:2147661]
Zeb2	5.09	5.97	3.69	0.000551	0.011	0.964	1.95	zinc finger E-box binding homeobox 2 [Source:MGI Symbol;Acc:MGI:1344407]
Dnajc13	6.02	6.53	3.69	0.000553	0.011	0.455	1.37	DnaJ (Hsp40) homolog, subfamily C, member 13 [Source:MGI Symbol;Acc:MGI:2676368]
Prune2	7.7	8.29	3.69	0.000553	0.011	0.683	1.61	prune homolog 2 (Drosophila) [Source:MGI Symbol;Acc:MGI:1925004]
Rabgap1l	6.82	7.29	3.69	0.000554	0.011	0.573	1.49	RAB GTPase activating protein 1-like [Source:MGI Symbol;Acc:MGI:1352507]
Rab1b	7.03	6.64	-3.69	0.000554	0.011	-0.495	-1.41	RAB1B, member RAS oncogene family [Source:MGI Symbol;Acc:MGI:1923558]
Rab24	6.08	5.48	-3.68	0.000555	0.011	-0.598	-1.51	RAB24, member RAS oncogene family [Source:MGI Symbol;Acc:MGI:105065]
Lrfn2	4.55	3.87	-3.68	0.000555	0.011	-0.652	-1.57	leucine rich repeat and fibronectin type III domain containing 2 [Source:MGI Symbol;Acc:MGI:1917780]
Cacna1h	6.85	6.42	-3.68	0.000556	0.011	-0.68	-1.6	calcium channel, voltage-dependent, T type, alpha 1H subunit [Source:MGI Symbol;Acc:MGI:1928842]
Axin2	4.82	4.3	-3.68	0.000558	0.011	-0.523	-1.44	axin2 [Source:MGI Symbol;Acc:MGI:1270862]
Slco1a4	5.71	6.26	3.68	0.000559	0.011	0.597	1.51	solute carrier organic anion transporter family, member 1a4 [Source:MGI Symbol;Acc:MGI:1351896]
Slc44a2	5.56	5.35	-3.68	0.000559	0.011	-0.385	-1.31	solute carrier family 44, member 2 [Source:MGI Symbol;Acc:MGI:1915932]
Nudt4	7.8	8.05	3.68	0.000559	0.011	0.402	1.32	nudix (nucleoside diphosphate linked moiety X)-type motif 4 [Source:MGI Symbol;Acc:MGI:1918457]
1700019D03Rik	2.8	3.31	3.68	0.000562	0.0111	0.897	1.86	RIKEN cDNA 1700019D03 gene [Source:MGI Symbol;Acc:MGI:1914330]
Ankib1	5.77	6.35	3.68	0.000565	0.0111	0.511	1.43	ankyrin repeat and IBR domain containing 1 [Source:MGI Symbol;Acc:MGI:1918047]
Lmnb2	5.19	4.61	-3.68	0.000566	0.0111	-0.601	-1.52	lamin B2 [Source:MGI Symbol;Acc:MGI:96796]
Mks1	3.8	3.29	-3.68	0.000566	0.0111	-0.644	-1.56	Meckel syndrome, type 1 [Source:MGI Symbol;Acc:MGI:3584243]
Kpna1	6.99	7.44	3.68	0.000568	0.0111	0.494	1.41	karyopherin (importin) alpha 1 [Source:MGI Symbol;Acc:MGI:103560]
Sox4	3.92	3.12	-3.68	0.000569	0.0111	-0.735	-1.66	SRY (sex determining region Y)-box 4 [Source:MGI Symbol;Acc:MGI:98366]
Hcn3	5.23	4.73	-3.68	0.00057	0.0111	-0.699	-1.62	hyperpolarization-activated, cyclic nucleotide-gated K+ 3 [Source:MGI Symbol;Acc:MGI:1298211]
Gps2	3.33	2.67	-3.68	0.000572	0.0112	-0.769	-1.7	G protein pathway suppressor 2 [Source:MGI Symbol;Acc:MGI:1891751]
Nhlrc2	2.54	3.45	3.67	0.000573	0.0112	0.839	1.79	NHL repeat containing 2 [Source:MGI Symbol;Acc:MGI:1914116]
Sema6b	6.85	6.36	-3.67	0.000573	0.0112	-0.612	-1.53	sema domain, transmembrane domain (TM), and cytoplasmic domain, (semaphorin) 6B [Source:MGI Symbol;Acc:MGI:1202889]
Wdr5	5.14	4.78	-3.67	0.000577	0.0112	-0.41	-1.33	WD repeat domain 5 [Source:MGI Symbol;Acc:MGI:2155884]
Csad	5.21	4.84	-3.67	0.000578	0.0112	-0.531	-1.44	cysteine sulfinic acid decarboxylase [Source:MGI Symbol;Acc:MGI:2180098]
Nyap2	4.32	5.31	3.67	0.000579	0.0112	0.884	1.85	neuronal tyrosine-phophorylated phosphoinositide 3-kinase adaptor 2 [Source:MGI Symbol;Acc:MGI:2443135]
Vps37a	6.51	7.02	3.67	0.00058	0.0112	0.616	1.53	vacuolar protein sorting 37A (yeast) [Source:MGI Symbol;Acc:MGI:1261835]
Sec24a	4.76	5.51	3.67	0.000581	0.0112	0.739	1.67	Sec24 related gene family, member A (S. cerevisiae) [Source:MGI Symbol;Acc:MGI:1924621]
Cab39	8.2	8.58	3.67	0.000582	0.0112	0.455	1.37	calcium binding protein 39 [Source:MGI Symbol;Acc:MGI:107438]
Dennd4c	3.91	4.67	3.67	0.000583	0.0113	0.717	1.64	DENN/MADD domain containing 4C [Source:MGI Symbol;Acc:MGI:1914769]
Prr36	5.39	4.94	-3.67	0.000584	0.0113	-0.466	-1.38	proline rich 36 [Source:MGI Symbol;Acc:MGI:3605626]
Stat3	6.42	6.18	-3.67	0.000585	0.0113	-0.368	-1.29	signal transducer and activator of transcription 3 [Source:MGI Symbol;Acc:MGI:103038]
Tfip11	5.53	5.15	-3.67	0.000585	0.0113	-0.54	-1.45	tuftelin interacting protein 11 [Source:MGI Symbol;Acc:MGI:1930075]
Mmgt1	5.31	5.93	3.67	0.000587	0.0113	0.696	1.62	membrane magnesium transporter 1 [Source:MGI Symbol;Acc:MGI:2384305]
Crocc	6.84	6.32	-3.67	0.000587	0.0113	-0.656	-1.58	ciliary rootlet coiled-coil, rootletin [Source:MGI Symbol;Acc:MGI:3529431]
Hmha1	2.8	2.23	-3.67	0.000588	0.0113	-0.774	-1.71	histocompatibility (minor) HA-1 [Source:MGI Symbol;Acc:MGI:1917969]
Fcho2	5.37	5.99	3.67	0.000588	0.0113	0.741	1.67	FCH domain only 2 [Source:MGI Symbol;Acc:MGI:3505790]
Cul7	6.5	5.92	-3.67	0.00059	0.0113	-0.588	-1.5	cullin 7 [Source:MGI Symbol;Acc:MGI:1913765]
Pfkl	7.1	6.43	-3.66	0.000591	0.0113	-0.8	-1.74	phosphofructokinase, liver, B-type [Source:MGI Symbol;Acc:MGI:97547]
Ash1l	7.16	7.66	3.66	0.000592	0.0113	0.488	1.4	ash1 (absent, small, or homeotic)-like (Drosophila) [Source:MGI Symbol;Acc:MGI:2183158]
Grik5	7.36	6.79	-3.66	0.000592	0.0113	-0.637	-1.55	glutamate receptor, ionotropic, kainate 5 (gamma 2) [Source:MGI Symbol;Acc:MGI:95818]
Zfp930	2.21	3.09	3.66	0.000593	0.0113	1.11	2.16	zinc finger protein 930 [Source:MGI Symbol;Acc:MGI:2675306]
Mpnd	5.68	4.81	-3.66	0.000593	0.0113	-1.04	-2.05	MPN domain containing [Source:MGI Symbol;Acc:MGI:1915297]
Srrd	3.52	2.9	-3.66	0.000593	0.0113	-0.748	-1.68	SRR1 domain containing [Source:MGI Symbol;Acc:MGI:1917368]
Zc3h4	5.97	5.65	-3.66	0.000594	0.0113	-0.441	-1.36	zinc finger CCCH-type containing 4 [Source:MGI Symbol;Acc:MGI:2682314]
Ruvbl2	3.81	3.16	-3.66	0.000596	0.0113	-0.97	-1.96	RuvB-like protein 2 [Source:MGI Symbol;Acc:MGI:1342299]
Nup85	5.58	5.14	-3.66	0.000598	0.0113	-0.523	-1.44	nucleoporin 85 [Source:MGI Symbol;Acc:MGI:3046173]
Rsbn1	4.44	5.22	3.66	0.000599	0.0113	0.811	1.75	rosbin, round spermatid basic protein 1 [Source:MGI Symbol;Acc:MGI:2444993]
Fam19a5	7.39	7.02	-3.66	0.000599	0.0113	-0.447	-1.36	family with sequence similarity 19, member A5 [Source:MGI Symbol;Acc:MGI:2146182]
Cpxm1	2.79	2.32	-3.66	0.000599	0.0113	-0.725	-1.65	carboxypeptidase X 1 (M14 family) [Source:MGI Symbol;Acc:MGI:1934569]
Gm17244	1.21	-0.031	-3.66	0.0006	0.0113	-1.22	-2.32	predicted gene, 17244 [Source:MGI Symbol;Acc:MGI:4936878]
Arpc1a	7.01	6.45	-3.66	0.0006	0.0113	-0.623	-1.54	actin related protein 2/3 complex, subunit 1A [Source:MGI Symbol;Acc:MGI:1928896]
Rrbp1	5.74	5.16	-3.66	0.000601	0.0113	-0.597	-1.51	ribosome binding protein 1 [Source:MGI Symbol;Acc:MGI:1932395]
Ipo7	6.85	7.37	3.66	0.000603	0.0113	0.536	1.45	importin 7 [Source:MGI Symbol;Acc:MGI:2152414]
Tmem132a	6.25	5.7	-3.66	0.000603	0.0113	-0.74	-1.67	transmembrane protein 132A [Source:MGI Symbol;Acc:MGI:2147810]
Plcxd1	4.33	3.84	-3.66	0.000604	0.0113	-0.638	-1.56	phosphatidylinositol-specific phospholipase C, X domain containing 1 [Source:MGI Symbol;Acc:MGI:2685422]
Gm42632	-2.7	0.12	3.66	0.000605	0.0113	2.44	5.41	predicted gene 42632 [Source:MGI Symbol;Acc:MGI:5662769]
Tm9sf4	6.39	6.12	-3.66	0.000606	0.0113	-0.465	-1.38	transmembrane 9 superfamily protein member 4 [Source:MGI Symbol;Acc:MGI:2139220]
Agtpbp1	7	7.41	3.66	0.000608	0.0114	0.4	1.32	ATP/GTP binding protein 1 [Source:MGI Symbol;Acc:MGI:2159437]
Zfp956	4.98	4.44	-3.65	0.000609	0.0114	-0.467	-1.38	zinc finger protein 956 [Source:MGI Symbol;Acc:MGI:2141515]
Nptx2	5.45	4.23	-3.65	0.00061	0.0114	-1.16	-2.24	neuronal pentraxin 2 [Source:MGI Symbol;Acc:MGI:1858209]
Hsd3b7	3.38	2.9	-3.65	0.000611	0.0114	-0.722	-1.65	hydroxy-delta-5-steroid dehydrogenase, 3 beta- and steroid delta-isomerase 7 [Source:MGI Symbol;Acc:MGI:2141879]
Atg4c	5.48	5.94	3.65	0.000612	0.0114	0.566	1.48	autophagy related 4C, cysteine peptidase [Source:MGI Symbol;Acc:MGI:2651854]
Nlgn2	8.28	7.88	-3.65	0.000612	0.0114	-0.5	-1.41	neuroligin 2 [Source:MGI Symbol;Acc:MGI:2681835]
Rrp7a	5.51	5.06	-3.65	0.000614	0.0114	-0.621	-1.54	ribosomal RNA processing 7 homolog A (S. cerevisiae) [Source:MGI Symbol;Acc:MGI:1922028]
Dnmt1	6.42	6.14	-3.65	0.000615	0.0114	-0.377	-1.3	DNA methyltransferase (cytosine-5) 1 [Source:MGI Symbol;Acc:MGI:94912]
Miip	4.83	4.3	-3.65	0.000615	0.0114	-0.572	-1.49	migration and invasion inhibitory protein [Source:MGI Symbol;Acc:MGI:106506]
Zfp763	4.19	4.68	3.65	0.000616	0.0114	0.687	1.61	zinc finger protein 763 [Source:MGI Symbol;Acc:MGI:1920701]
Nosip	5.39	4.8	-3.65	0.000618	0.0114	-0.723	-1.65	nitric oxide synthase interacting protein [Source:MGI Symbol;Acc:MGI:1913644]
Smc5	4.5	5.06	3.65	0.000618	0.0114	0.597	1.51	structural maintenance of chromosomes 5 [Source:MGI Symbol;Acc:MGI:2385088]
Pou2f1	4.05	4.56	3.65	0.000618	0.0114	0.574	1.49	POU domain, class 2, transcription factor 1 [Source:MGI Symbol;Acc:MGI:101898]
Fance	3.86	3.33	-3.65	0.000619	0.0114	-0.706	-1.63	Fanconi anemia, complementation group E [Source:MGI Symbol;Acc:MGI:1920025]
Bap1	6.54	6.22	-3.65	0.000621	0.0115	-0.386	-1.31	Brca1 associated protein 1 [Source:MGI Symbol;Acc:MGI:1206586]
Gsk3a	6.41	6.01	-3.65	0.000624	0.0115	-0.557	-1.47	glycogen synthase kinase 3 alpha [Source:MGI Symbol;Acc:MGI:2152453]
Rnf10	7.65	7.29	-3.65	0.000625	0.0115	-0.359	-1.28	ring finger protein 10 [Source:MGI Symbol;Acc:MGI:1859162]
Gm38299	1.96	2.54	3.65	0.000626	0.0115	0.91	1.88	predicted gene, 38299 [Source:MGI Symbol;Acc:MGI:5611527]
Otud6b	6.41	6.85	3.65	0.000626	0.0115	0.502	1.42	OTU domain containing 6B [Source:MGI Symbol;Acc:MGI:1919451]
Fam208b	4.38	5.3	3.65	0.000627	0.0115	0.88	1.84	family with sequence similarity 208, member B [Source:MGI Symbol;Acc:MGI:2145274]
Il1rapl1	3.6	4.53	3.64	0.000628	0.0115	1.03	2.04	interleukin 1 receptor accessory protein-like 1 [Source:MGI Symbol;Acc:MGI:2687319]
Stard9	5.07	5.86	3.64	0.00063	0.0115	0.66	1.58	START domain containing 9 [Source:MGI Symbol;Acc:MGI:3045258]
Ccdc106	4.71	4.18	-3.64	0.00063	0.0115	-0.651	-1.57	coiled-coil domain containing 106 [Source:MGI Symbol;Acc:MGI:2385900]
Ralgds	6.66	6.32	-3.64	0.000632	0.0115	-0.509	-1.42	ral guanine nucleotide dissociation stimulator [Source:MGI Symbol;Acc:MGI:107485]
Ncln	5.32	4.83	-3.64	0.000632	0.0115	-0.706	-1.63	nicalin homolog (zebrafish) [Source:MGI Symbol;Acc:MGI:1926081]
Nfat5	6.56	7.28	3.64	0.000634	0.0116	0.711	1.64	nuclear factor of activated T cells 5 [Source:MGI Symbol;Acc:MGI:1859333]
Ubr5	7.45	7.98	3.64	0.000637	0.0116	0.489	1.4	ubiquitin protein ligase E3 component n-recognin 5 [Source:MGI Symbol;Acc:MGI:1918040]
Pcbp4	6.51	5.72	-3.64	0.000637	0.0116	-0.953	-1.94	poly(rC) binding protein 4 [Source:MGI Symbol;Acc:MGI:1890471]
Cdh12	2.29	3.24	3.64	0.000638	0.0116	1.05	2.07	cadherin 12 [Source:MGI Symbol;Acc:MGI:109503]
Usp9x	6.61	7.75	3.64	0.000639	0.0116	1.06	2.09	ubiquitin specific peptidase 9, X chromosome [Source:MGI Symbol;Acc:MGI:894681]
Unc5a	6.08	5.53	-3.64	0.00064	0.0116	-0.677	-1.6	unc-5 homolog A (C. elegans) [Source:MGI Symbol;Acc:MGI:894682]
Cdk14	7.05	7.69	3.64	0.000644	0.0116	0.608	1.52	cyclin-dependent kinase 14 [Source:MGI Symbol;Acc:MGI:894318]
Trmu	4.56	4.11	-3.64	0.000644	0.0116	-0.641	-1.56	tRNA 5-methylaminomethyl-2-thiouridylate methyltransferase [Source:MGI Symbol;Acc:MGI:1919276]
Gm43059	1.11	2.55	3.64	0.000644	0.0116	1.53	2.89	predicted gene 43059 [Source:MGI Symbol;Acc:MGI:5663196]
Gtf2a2	4.47	4.96	3.64	0.000647	0.0117	0.58	1.5	general transcription factor II A, 2 [Source:MGI Symbol;Acc:MGI:1933289]
Ciz1	4.99	4.53	-3.63	0.000648	0.0117	-0.601	-1.52	CDKN1A interacting zinc finger protein 1 [Source:MGI Symbol;Acc:MGI:1920234]
Qtrt1	3.96	3.26	-3.63	0.000648	0.0117	-0.635	-1.55	queuine tRNA-ribosyltransferase 1 [Source:MGI Symbol;Acc:MGI:1931441]
Nr5a1	4.74	1.57	-3.63	0.000652	0.0117	-2.39	-5.23	nuclear receptor subfamily 5, group A, member 1 [Source:MGI Symbol;Acc:MGI:1346833]
Vps4a	6.85	6.45	-3.63	0.000655	0.0118	-0.403	-1.32	vacuolar protein sorting 4a (yeast) [Source:MGI Symbol;Acc:MGI:1890520]
Ccdc79	0.538	1.43	3.63	0.000657	0.0118	1.26	2.39	coiled-coil domain containing 79 [Source:MGI Symbol;Acc:MGI:2443187]
Lrrc16b	7.24	6.8	-3.63	0.000659	0.0118	-0.596	-1.51	leucine rich repeat containing 16B [Source:MGI Symbol;Acc:MGI:2448573]
Tlr3	3.37	4.13	3.63	0.00066	0.0118	0.795	1.74	toll-like receptor 3 [Source:MGI Symbol;Acc:MGI:2156367]
NA	-0.0533	1.56	3.63	0.00066	0.0118	1.65	3.14	NA
Snrnp70	7.57	6.97	-3.63	0.000662	0.0119	-0.567	-1.48	small nuclear ribonucleoprotein 70 (U1) [Source:MGI Symbol;Acc:MGI:98341]
Clpp	5.17	4.49	-3.63	0.000665	0.0119	-0.806	-1.75	caseinolytic mitochondrial matrix peptidase proteolytic subunit [Source:MGI Symbol;Acc:MGI:1858213]
Thbs3	5.3	4.67	-3.62	0.000668	0.0119	-0.674	-1.6	thrombospondin 3 [Source:MGI Symbol;Acc:MGI:98739]
Ucp2	7.09	6.46	-3.62	0.00067	0.0119	-0.657	-1.58	uncoupling protein 2 (mitochondrial, proton carrier) [Source:MGI Symbol;Acc:MGI:109354]
Adsl	4.93	4.52	-3.62	0.000672	0.012	-0.66	-1.58	adenylosuccinate lyase [Source:MGI Symbol;Acc:MGI:103202]
Gstm4	3.4	2.79	-3.62	0.000673	0.012	-0.68	-1.6	glutathione S-transferase, mu 4 [Source:MGI Symbol;Acc:MGI:95862]
Zfp709	2.95	3.69	3.62	0.000673	0.012	0.804	1.75	zinc finger protein 709 [Source:MGI Symbol;Acc:MGI:2384299]
Aph1b	5.22	5.81	3.62	0.000674	0.012	0.561	1.48	anterior pharynx defective 1b homolog (C. elegans) [Source:MGI Symbol;Acc:MGI:3522097]
2700097O09Rik	4.52	5.04	3.62	0.000675	0.012	0.555	1.47	RIKEN cDNA 2700097O09 gene [Source:MGI Symbol;Acc:MGI:1919908]
Ankrd13d	5.86	5.35	-3.62	0.000675	0.012	-0.584	-1.5	ankyrin repeat domain 13 family, member D [Source:MGI Symbol;Acc:MGI:1915673]
Tsta3	3.57	3.04	-3.62	0.000676	0.012	-0.637	-1.56	tissue specific transplantation antigen P35B [Source:MGI Symbol;Acc:MGI:98857]
Tmub1	3.87	3.17	-3.62	0.000677	0.012	-0.92	-1.89	transmembrane and ubiquitin-like domain containing 1 [Source:MGI Symbol;Acc:MGI:1923764]
Enpp6	1.03	2.21	3.62	0.00068	0.012	1.13	2.19	ectonucleotide pyrophosphatase/phosphodiesterase 6 [Source:MGI Symbol;Acc:MGI:2445171]
Wscd2	5.28	4.75	-3.62	0.000681	0.012	-0.699	-1.62	WSC domain containing 2 [Source:MGI Symbol;Acc:MGI:2445030]
Fam181a	0.524	-0.765	-3.62	0.000681	0.012	-1.65	-3.14	family with sequence similarity 181, member A [Source:MGI Symbol;Acc:MGI:3647570]
Thnsl2	3.36	2.72	-3.62	0.000681	0.012	-0.711	-1.64	threonine synthase-like 2 (bacterial) [Source:MGI Symbol;Acc:MGI:3041254]
H2-T24	1.38	3.1	3.62	0.000683	0.012	1.57	2.96	histocompatibility 2, T region locus 24 [Source:MGI Symbol;Acc:MGI:95958]
Pebp1	6.21	5.53	-3.62	0.000684	0.012	-0.688	-1.61	phosphatidylethanolamine binding protein 1 [Source:MGI Symbol;Acc:MGI:1344408]
Reep2	6.57	6.07	-3.62	0.000685	0.012	-0.588	-1.5	receptor accessory protein 2 [Source:MGI Symbol;Acc:MGI:2385070]
Rab3b	5.9	5.07	-3.62	0.000688	0.0121	-0.8	-1.74	RAB3B, member RAS oncogene family [Source:MGI Symbol;Acc:MGI:1917158]
Ppdpf	3.12	2.34	-3.62	0.000688	0.0121	-0.946	-1.93	pancreatic progenitor cell differentiation and proliferation factor homolog (zebrafish)RIKEN cDNA 2700038C09 gene [Source:MGI Symbol;Acc:MGI:1913746]
Pag1	5.18	5.72	3.61	0.000689	0.0121	0.52	1.43	phosphoprotein associated with glycosphingolipid microdomains 1 [Source:MGI Symbol;Acc:MGI:2443160]
Rnaseh2c	2.61	1.51	-3.61	0.000692	0.0121	-1.02	-2.02	ribonuclease H2, subunit C [Source:MGI Symbol;Acc:MGI:1915459]
Megf10	4.96	5.72	3.61	0.000693	0.0121	0.568	1.48	multiple EGF-like-domains 10 [Source:MGI Symbol;Acc:MGI:2685177]
Scaf11	6.12	6.55	3.61	0.000693	0.0121	0.455	1.37	SR-related CTD-associated factor 11 [Source:MGI Symbol;Acc:MGI:1919443]
Dxo	3.84	3.35	-3.61	0.000696	0.0121	-0.583	-1.5	decapping exoribonuclease [Source:MGI Symbol;Acc:MGI:1890444]
A230065H16Rik	2.27	1.01	-3.61	0.000699	0.0122	-1.45	-2.74	RIKEN cDNA A230065H16 gene [Source:MGI Symbol;Acc:MGI:2685744]
Far1	7.49	8.12	3.61	0.0007	0.0122	0.683	1.61	fatty acyl CoA reductase 1 [Source:MGI Symbol;Acc:MGI:1914670]
Nxt2	5.64	6.22	3.61	0.000703	0.0122	0.717	1.64	nuclear transport factor 2-like export factor 2 [Source:MGI Symbol;Acc:MGI:2147914]
Alox8	1.72	2.94	3.61	0.000706	0.0123	1.13	2.19	arachidonate 8-lipoxygenase [Source:MGI Symbol;Acc:MGI:1098228]
Cdh8	5.58	6.15	3.61	0.000708	0.0123	0.605	1.52	cadherin 8 [Source:MGI Symbol;Acc:MGI:107434]
Slc38a9	5.31	5.75	3.61	0.000708	0.0123	0.478	1.39	solute carrier family 38, member 9 [Source:MGI Symbol;Acc:MGI:1918839]
Sugp2	6.99	6.71	-3.6	0.00071	0.0123	-0.383	-1.3	SURP and G patch domain containing 2 [Source:MGI Symbol;Acc:MGI:2678085]
Pdzd8	6.49	7.05	3.6	0.000711	0.0123	0.491	1.4	PDZ domain containing 8 [Source:MGI Symbol;Acc:MGI:2677270]
Cep350	6.08	6.74	3.6	0.000715	0.0124	0.739	1.67	centrosomal protein 350 [Source:MGI Symbol;Acc:MGI:1921331]
Meis3	5.33	4.82	-3.6	0.000716	0.0124	-0.695	-1.62	Meis homeobox 3 [Source:MGI Symbol;Acc:MGI:108519]
Armcx6	3.32	2.54	-3.6	0.000716	0.0124	-0.791	-1.73	armadillo repeat containing, X-linked 6 [Source:MGI Symbol;Acc:MGI:2147993]
Dda1	5.9	5.42	-3.6	0.000717	0.0124	-0.591	-1.51	DET1 and DDB1 associated 1 [Source:MGI Symbol;Acc:MGI:1913748]
Gm42572	-2.7	0.0093	3.6	0.000718	0.0124	2.36	5.14	predicted gene 42572 [Source:MGI Symbol;Acc:MGI:5662709]
Pex14	4.52	4.1	-3.6	0.000718	0.0124	-0.596	-1.51	peroxisomal biogenesis factor 14 [Source:MGI Symbol;Acc:MGI:1927868]
Ankrd34c	3.84	4.33	3.6	0.000721	0.0124	0.672	1.59	ankyrin repeat domain 34C [Source:MGI Symbol;Acc:MGI:2685617]
Rbm17	5.75	5.22	-3.6	0.000721	0.0124	-0.486	-1.4	RNA binding motif protein 17 [Source:MGI Symbol;Acc:MGI:1924188]
Slc4a4	8.33	8.88	3.6	0.000722	0.0124	0.566	1.48	solute carrier family 4 (anion exchanger), member 4 [Source:MGI Symbol;Acc:MGI:1927555]
Txndc16	6.79	7.22	3.6	0.000726	0.0124	0.523	1.44	thioredoxin domain containing 16 [Source:MGI Symbol;Acc:MGI:1917811]
Mapre3	7.74	7.43	-3.6	0.000727	0.0125	-0.396	-1.32	microtubule-associated protein, RP/EB family, member 3 [Source:MGI Symbol;Acc:MGI:2140967]
Snapc1	5.96	6.38	3.6	0.000728	0.0125	0.49	1.4	small nuclear RNA activating complex, polypeptide 1 [Source:MGI Symbol;Acc:MGI:1922877]
Gdap10	-1.6	1.3	3.6	0.000729	0.0125	2.47	5.53	ganglioside-induced differentiation-associated-protein 10 [Source:MGI Symbol;Acc:MGI:1338008]
Mrps28	2.5	1.69	-3.6	0.00073	0.0125	-1.17	-2.26	mitochondrial ribosomal protein S28 [Source:MGI Symbol;Acc:MGI:1913480]
Dvl1	6.38	5.89	-3.6	0.00073	0.0125	-0.605	-1.52	dishevelled, dsh homolog 1 (Drosophila) [Source:MGI Symbol;Acc:MGI:94941]
Dhx38	5.48	4.98	-3.6	0.00073	0.0125	-0.611	-1.53	DEAH (Asp-Glu-Ala-His) box polypeptide 38 [Source:MGI Symbol;Acc:MGI:1927617]
Jph4	7.68	7.23	-3.59	0.000734	0.0125	-0.453	-1.37	junctophilin 4 [Source:MGI Symbol;Acc:MGI:2443113]
Pogk	6.12	6.51	3.59	0.000738	0.0126	0.395	1.32	pogo transposable element with KRAB domain [Source:MGI Symbol;Acc:MGI:1918842]
Uggt2	5.49	6.15	3.59	0.000741	0.0126	0.626	1.54	UDP-glucose glycoprotein glucosyltransferase 2 [Source:MGI Symbol;Acc:MGI:1913685]
Zfp91	6.9	7.38	3.59	0.000743	0.0126	0.498	1.41	zinc finger protein 91 [Source:MGI Symbol;Acc:MGI:104854]
Il17d	2.5	1.85	-3.59	0.000743	0.0126	-0.983	-1.98	interleukin 17D [Source:MGI Symbol;Acc:MGI:2446510]
Hirip3	4.33	3.76	-3.59	0.000745	0.0126	-0.742	-1.67	HIRA interacting protein 3 [Source:MGI Symbol;Acc:MGI:2142364]
Leng8	8.57	8.34	-3.59	0.000745	0.0126	-0.457	-1.37	leukocyte receptor cluster (LRC) member 8 [Source:MGI Symbol;Acc:MGI:2142195]
Gm17494	2.18	2.7	3.59	0.000746	0.0126	0.79	1.73	predicted gene, 17494 [Source:MGI Symbol;Acc:MGI:4937128]
Creld1	6.19	5.48	-3.59	0.000748	0.0126	-0.783	-1.72	cysteine-rich with EGF-like domains 1 [Source:MGI Symbol;Acc:MGI:2152539]
Zkscan1	5.78	6.38	3.59	0.000749	0.0126	0.606	1.52	zinc finger with KRAB and SCAN domains 1 [Source:MGI Symbol;Acc:MGI:1921820]
Cbs	5.46	4.89	-3.59	0.000749	0.0126	-0.751	-1.68	cystathionine beta-synthase [Source:MGI Symbol;Acc:MGI:88285]
Phip	6.21	6.71	3.59	0.000753	0.0127	0.723	1.65	pleckstrin homology domain interacting protein [Source:MGI Symbol;Acc:MGI:1932404]
Gaa	10.4	9.92	-3.59	0.000753	0.0127	-0.622	-1.54	glucosidase, alpha, acid [Source:MGI Symbol;Acc:MGI:95609]
Hexb	5.49	5.94	3.59	0.000754	0.0127	0.486	1.4	hexosaminidase B [Source:MGI Symbol;Acc:MGI:96074]
Itch	6.01	6.46	3.58	0.000756	0.0127	0.482	1.4	itchy, E3 ubiquitin protein ligase [Source:MGI Symbol;Acc:MGI:1202301]
Nacad	5.78	5.28	-3.58	0.000756	0.0127	-0.601	-1.52	NAC alpha domain containing [Source:MGI Symbol;Acc:MGI:3603030]
Dmd	5.42	6.02	3.58	0.000757	0.0127	0.591	1.51	dystrophin, muscular dystrophy [Source:MGI Symbol;Acc:MGI:94909]
Serpina3n	5.9	5.5	-3.58	0.000759	0.0127	-0.631	-1.55	serine (or cysteine) peptidase inhibitor, clade A, member 3N [Source:MGI Symbol;Acc:MGI:105045]
Chchd1	3.75	2.99	-3.58	0.000759	0.0127	-0.852	-1.8	coiled-coil-helix-coiled-coil-helix domain containing 1 [Source:MGI Symbol;Acc:MGI:1913371]
Ept1	6.89	7.18	3.58	0.00076	0.0127	0.331	1.26	ethanolaminephosphotransferase 1 (CDP-ethanolamine-specific) [Source:MGI Symbol;Acc:MGI:107898]
Icam5	4.64	3.66	-3.58	0.00076	0.0127	-1.09	-2.13	intercellular adhesion molecule 5, telencephalin [Source:MGI Symbol;Acc:MGI:109430]
Serf1	0.142	-1.38	-3.58	0.000761	0.0127	-1.8	-3.48	small EDRK-rich factor 1 [Source:MGI Symbol;Acc:MGI:1337114]
Gm38198	2.76	3.93	3.58	0.000763	0.0127	1.52	2.87	predicted gene, 38198 [Source:MGI Symbol;Acc:MGI:5611426]
Foxp2	4.87	5.61	3.58	0.000764	0.0127	1.01	2.01	forkhead box P2 [Source:MGI Symbol;Acc:MGI:2148705]
Repin1	5.01	4.51	-3.58	0.000764	0.0127	-0.685	-1.61	replication initiator 1 [Source:MGI Symbol;Acc:MGI:1889817]
Trim11	4.72	4.16	-3.58	0.000764	0.0127	-0.563	-1.48	tripartite motif-containing 11 [Source:MGI Symbol;Acc:MGI:2137355]
Pvrl3	4.03	4.65	3.58	0.000766	0.0127	0.693	1.62	poliovirus receptor-related 3 [Source:MGI Symbol;Acc:MGI:1930171]
Crip2	4.77	3.97	-3.58	0.000766	0.0127	-1.21	-2.31	cysteine rich protein 2 [Source:MGI Symbol;Acc:MGI:1915587]
Dmxl2	7.22	7.85	3.58	0.000769	0.0127	0.578	1.49	Dmx-like 2 [Source:MGI Symbol;Acc:MGI:2444630]
Aifm2	3.84	3.4	-3.58	0.000769	0.0127	-0.623	-1.54	apoptosis-inducing factor, mitochondrion-associated 2 [Source:MGI Symbol;Acc:MGI:1918611]
Zfp398	3.36	4.13	3.58	0.000774	0.0128	0.741	1.67	zinc finger protein 398 [Source:MGI Symbol;Acc:MGI:1917856]
Kif1b	9.96	10.4	3.58	0.000774	0.0128	0.433	1.35	kinesin family member 1B [Source:MGI Symbol;Acc:MGI:108426]
Prkcsh	6.27	5.68	-3.58	0.000774	0.0128	-0.662	-1.58	protein kinase C substrate 80K-H [Source:MGI Symbol;Acc:MGI:107877]
Ndufa11	3.83	2.81	-3.58	0.000774	0.0128	-1.21	-2.31	NADH dehydrogenase (ubiquinone) 1 alpha subcomplex 11 [Source:MGI Symbol;Acc:MGI:1917125]
Gps1	6.72	6.35	-3.58	0.000774	0.0128	-0.423	-1.34	G protein pathway suppressor 1 [Source:MGI Symbol;Acc:MGI:2384801]
Pdpk1	7.37	7.87	3.57	0.000778	0.0128	0.508	1.42	3-phosphoinositide dependent protein kinase 1 [Source:MGI Symbol;Acc:MGI:1338068]
Gpcpd1	6.67	7.17	3.57	0.00078	0.0128	0.565	1.48	glycerophosphocholine phosphodiesterase GDE1 homolog (S. cerevisiae) [Source:MGI Symbol;Acc:MGI:104898]
Glra3	2.76	4.09	3.57	0.000781	0.0128	1.24	2.36	glycine receptor, alpha 3 subunit [Source:MGI Symbol;Acc:MGI:95749]
Borcs6	4.15	3.42	-3.57	0.000783	0.0129	-0.932	-1.91	BLOC-1 related complex subunit 6 [Source:MGI Symbol;Acc:MGI:1919173]
Hdac5	7.16	6.67	-3.57	0.000783	0.0129	-0.585	-1.5	histone deacetylase 5 [Source:MGI Symbol;Acc:MGI:1333784]
Ccdc82	3.69	4.54	3.57	0.000787	0.0129	0.745	1.68	coiled-coil domain containing 82 [Source:MGI Symbol;Acc:MGI:1913646]
Man2c1	6.84	6.51	-3.57	0.000789	0.0129	-0.435	-1.35	mannosidase, alpha, class 2C, member 1 [Source:MGI Symbol;Acc:MGI:1920994]
Lgals4	2.09	1.51	-3.57	0.000791	0.0129	-1.02	-2.02	lectin, galactose binding, soluble 4 [Source:MGI Symbol;Acc:MGI:107536]
Lrrc45	6.4	5.84	-3.57	0.000791	0.0129	-0.684	-1.61	leucine rich repeat containing 45 [Source:MGI Symbol;Acc:MGI:2387183]
Nol12	3.24	2.39	-3.57	0.000791	0.0129	-0.898	-1.86	nucleolar protein 12 [Source:MGI Symbol;Acc:MGI:2146285]
E130307A14Rik	5.08	4.76	-3.57	0.000792	0.0129	-0.342	-1.27	RIKEN cDNA E130307A14 gene [Source:MGI Symbol;Acc:MGI:3036287]
Sh2b1	4.9	4.34	-3.57	0.000792	0.0129	-0.625	-1.54	SH2B adaptor protein 1 [Source:MGI Symbol;Acc:MGI:1201407]
Gga1	5.75	5.32	-3.57	0.000793	0.0129	-0.605	-1.52	golgi associated, gamma adaptin ear containing, ARF binding protein 1 [Source:MGI Symbol;Acc:MGI:2146207]
Dcakd	4.58	4.16	-3.57	0.000794	0.0129	-0.683	-1.61	dephospho-CoA kinase domain containing [Source:MGI Symbol;Acc:MGI:1915337]
Nol6	7.33	6.89	-3.57	0.000794	0.0129	-0.524	-1.44	nucleolar protein family 6 (RNA-associated) [Source:MGI Symbol;Acc:MGI:2140151]
Nr1d2	6.83	7.41	3.57	0.000796	0.0129	0.656	1.58	nuclear receptor subfamily 1, group D, member 2 [Source:MGI Symbol;Acc:MGI:2449205]
Jag2	6.28	5.83	-3.57	0.000796	0.0129	-0.6	-1.52	jagged 2 [Source:MGI Symbol;Acc:MGI:1098270]
Tyk2	4.62	4.2	-3.57	0.000799	0.013	-0.616	-1.53	tyrosine kinase 2 [Source:MGI Symbol;Acc:MGI:1929470]
Ipo4	7.09	6.74	-3.57	0.000799	0.013	-0.451	-1.37	importin 4 [Source:MGI Symbol;Acc:MGI:1923001]
Trip12	7.95	8.37	3.57	0.000801	0.013	0.46	1.38	thyroid hormone receptor interactor 12 [Source:MGI Symbol;Acc:MGI:1309481]
Ubr1	6.54	7.06	3.57	0.000802	0.013	0.66	1.58	ubiquitin protein ligase E3 component n-recognin 1 [Source:MGI Symbol;Acc:MGI:1277977]
Traf1	2.65	1.77	-3.56	0.000803	0.013	-0.871	-1.83	TNF receptor-associated factor 1 [Source:MGI Symbol;Acc:MGI:101836]
Zfp687	5.46	5.19	-3.56	0.000803	0.013	-0.508	-1.42	zinc finger protein 687 [Source:MGI Symbol;Acc:MGI:1925516]
Pvrl2	2.73	2.1	-3.56	0.000804	0.013	-0.824	-1.77	poliovirus receptor-related 2 [Source:MGI Symbol;Acc:MGI:97822]
Slc45a4	5.96	5.66	-3.56	0.000804	0.013	-0.429	-1.35	solute carrier family 45, member 4 [Source:MGI Symbol;Acc:MGI:2146236]
Arl6ip4	3.75	2.72	-3.56	0.000811	0.0131	-1.01	-2.01	ADP-ribosylation factor-like 6 interacting protein 4 [Source:MGI Symbol;Acc:MGI:1929500]
Chuk	6.04	6.51	3.56	0.000812	0.0131	0.542	1.46	conserved helix-loop-helix ubiquitous kinase [Source:MGI Symbol;Acc:MGI:99484]
Zfp638	6.54	6.97	3.56	0.000817	0.0131	0.551	1.46	zinc finger protein 638 [Source:MGI Symbol;Acc:MGI:1203484]
Kcnmb4os2	0.825	-0.63	-3.56	0.00082	0.0132	-1.37	-2.58	potassium large conductance calcium-activated channel, subfamily M, beta member 4, opposite strand 2 [Source:MGI Symbol;Acc:MGI:1918263]
Adh5	5.71	5.3	-3.56	0.00082	0.0132	-0.422	-1.34	alcohol dehydrogenase 5 (class III), chi polypeptide [Source:MGI Symbol;Acc:MGI:87929]
Zdhhc8	6.33	5.98	-3.56	0.000821	0.0132	-0.463	-1.38	zinc finger, DHHC domain containing 8 [Source:MGI Symbol;Acc:MGI:1338012]
Zmynd8	7.14	6.93	-3.56	0.000821	0.0132	-0.333	-1.26	zinc finger, MYND-type containing 8 [Source:MGI Symbol;Acc:MGI:1918025]
Tnks2	7.18	7.63	3.56	0.000823	0.0132	0.471	1.39	tankyrase, TRF1-interacting ankyrin-related ADP-ribose polymerase 2 [Source:MGI Symbol;Acc:MGI:1921743]
Jmjd1c	5.56	6.1	3.56	0.000824	0.0132	0.533	1.45	jumonji domain containing 1C [Source:MGI Symbol;Acc:MGI:1918614]
Pds5a	5.46	5.98	3.56	0.000824	0.0132	0.575	1.49	PDS5, regulator of cohesion maintenance, homolog A (S. cerevisiae) [Source:MGI Symbol;Acc:MGI:1918771]
Urgcp	6.33	5.99	-3.56	0.000826	0.0132	-0.445	-1.36	upregulator of cell proliferation [Source:MGI Symbol;Acc:MGI:1919296]
Slx4	4.56	4.26	-3.55	0.000827	0.0132	-0.435	-1.35	SLX4 structure-specific endonuclease subunit homolog (S. cerevisiae) [Source:MGI Symbol;Acc:MGI:106299]
Card9	2.05	1.19	-3.55	0.000828	0.0132	-0.906	-1.87	caspase recruitment domain family, member 9 [Source:MGI Symbol;Acc:MGI:2685628]
Scd1	8.45	8.91	3.55	0.00083	0.0132	0.499	1.41	stearoyl-Coenzyme A desaturase 1 [Source:MGI Symbol;Acc:MGI:98239]
Ssr2	5.46	4.83	-3.55	0.000831	0.0132	-0.609	-1.53	signal sequence receptor, beta [Source:MGI Symbol;Acc:MGI:1913506]
Khsrp	6.09	5.71	-3.55	0.000832	0.0132	-0.469	-1.38	KH-type splicing regulatory protein [Source:MGI Symbol;Acc:MGI:1336214]
Zfp513	3.32	2.7	-3.55	0.000835	0.0133	-0.92	-1.89	zinc finger protein 513 [Source:MGI Symbol;Acc:MGI:2141255]
Cnot1	6.83	7.38	3.55	0.000836	0.0133	0.505	1.42	CCR4-NOT transcription complex, subunit 1 [Source:MGI Symbol;Acc:MGI:2442402]
Atg9b	4.77	3.93	-3.55	0.000837	0.0133	-0.745	-1.68	autophagy related 9B [Source:MGI Symbol;Acc:MGI:2685420]
Pin1	5.26	4.77	-3.55	0.00084	0.0133	-0.632	-1.55	protein (peptidyl-prolyl cis/trans isomerase) NIMA-interacting 1 [Source:MGI Symbol;Acc:MGI:1346036]
Atp6ap2	8.73	9.06	3.55	0.000841	0.0133	0.512	1.43	ATPase, H+ transporting, lysosomal accessory protein 2 [Source:MGI Symbol;Acc:MGI:1917745]
Dcp2	6.91	7.4	3.55	0.000842	0.0133	0.535	1.45	DCP2 decapping enzyme homolog (S. cerevisiae) [Source:MGI Symbol;Acc:MGI:1917890]
Xiap	6.56	7.28	3.55	0.000844	0.0133	0.69	1.61	X-linked inhibitor of apoptosis [Source:MGI Symbol;Acc:MGI:107572]
1700125G02Rik	-0.3	1.04	3.55	0.000846	0.0133	1.47	2.77	RIKEN cDNA 1700125G02 gene [Source:MGI Symbol;Acc:MGI:1920878]
Npvf	2.9	1.42	-3.55	0.000846	0.0133	-1.48	-2.79	neuropeptide VF precursor [Source:MGI Symbol;Acc:MGI:1926488]
Myo9a	6.9	7.53	3.55	0.000846	0.0133	0.655	1.57	myosin IXa [Source:MGI Symbol;Acc:MGI:107735]
Ttll1	5.2	4.73	-3.55	0.000849	0.0133	-0.693	-1.62	tubulin tyrosine ligase-like 1 [Source:MGI Symbol;Acc:MGI:2443047]
Kcne1l	2.59	1.77	-3.55	0.000849	0.0133	-1.07	-2.09	potassium voltage-gated channel, Isk-related family, member 1-like, pseudogene [Source:MGI Symbol;Acc:MGI:1913490]
Gm42973	-1.6	0.717	3.55	0.000852	0.0134	2.83	7.13	predicted gene 42973 [Source:MGI Symbol;Acc:MGI:5663110]
Cyp2f2	0.264	-1.92	-3.55	0.000852	0.0134	-2.66	-6.3	cytochrome P450, family 2, subfamily f, polypeptide 2 [Source:MGI Symbol;Acc:MGI:88608]
Flot2	7.05	6.61	-3.54	0.000855	0.0134	-0.59	-1.51	flotillin 2 [Source:MGI Symbol;Acc:MGI:103309]
Gm43080	0.206	1.84	3.54	0.000857	0.0134	1.59	3.01	predicted gene 43080 [Source:MGI Symbol;Acc:MGI:5663217]
Tmem123	3.6	4.22	3.54	0.000861	0.0135	0.586	1.5	transmembrane protein 123 [Source:MGI Symbol;Acc:MGI:1919179]
Khnyn	4.94	4.5	-3.54	0.000864	0.0135	-0.545	-1.46	KH and NYN domain containing [Source:MGI Symbol;Acc:MGI:2451333]
Naa15	6.61	6.95	3.54	0.000865	0.0135	0.555	1.47	N(alpha)-acetyltransferase 15, NatA auxiliary subunit [Source:MGI Symbol;Acc:MGI:1922088]
Csnk1d	7.76	7.43	-3.54	0.000865	0.0135	-0.37	-1.29	casein kinase 1, delta [Source:MGI Symbol;Acc:MGI:1355272]
Zfp770	4.43	4.88	3.54	0.000866	0.0135	0.619	1.54	zinc finger protein 770 [Source:MGI Symbol;Acc:MGI:2445100]
Gm26835	-1.77	0.879	3.54	0.000867	0.0135	2.79	6.92	predicted gene, 26835 [Source:MGI Symbol;Acc:MGI:5477329]
Zdhhc4	4.74	4.37	-3.54	0.000867	0.0135	-0.543	-1.46	zinc finger, DHHC domain containing 4 [Source:MGI Symbol;Acc:MGI:1920131]
Apc	7.29	7.9	3.54	0.000869	0.0135	0.666	1.59	adenomatosis polyposis coli [Source:MGI Symbol;Acc:MGI:88039]
Irak1	6.41	6.12	-3.54	0.00087	0.0135	-0.375	-1.3	interleukin-1 receptor-associated kinase 1 [Source:MGI Symbol;Acc:MGI:107420]
Rnf112	7.24	6.63	-3.54	0.000876	0.0136	-0.663	-1.58	ring finger protein 112 [Source:MGI Symbol;Acc:MGI:106611]
Zfp654	4.17	4.8	3.54	0.000878	0.0136	0.772	1.71	zinc finger protein 654 [Source:MGI Symbol;Acc:MGI:1919270]
Agl	6.19	6.69	3.54	0.000878	0.0136	0.505	1.42	amylo-1,6-glucosidase, 4-alpha-glucanotransferase [Source:MGI Symbol;Acc:MGI:1924809]
Scai	5.44	6.22	3.53	0.000879	0.0136	0.813	1.76	suppressor of cancer cell invasion [Source:MGI Symbol;Acc:MGI:2443716]
Sc5d	5.29	5.88	3.54	0.000879	0.0136	0.51	1.42	sterol-C5-desaturase (fungal ERG3, delta-5-desaturase) homolog (S. cerevisae) [Source:MGI Symbol;Acc:MGI:1353611]
Chl1	8.08	8.73	3.53	0.000881	0.0136	0.724	1.65	cell adhesion molecule with homology to L1CAM [Source:MGI Symbol;Acc:MGI:1098266]
Tspyl5	6.05	6.52	3.53	0.000881	0.0136	0.512	1.43	testis-specific protein, Y-encoded-like 5 [Source:MGI Symbol;Acc:MGI:2442458]
Tmem201	6.54	6.09	-3.53	0.000881	0.0136	-0.496	-1.41	transmembrane protein 201 [Source:MGI Symbol;Acc:MGI:1196277]
Lifr	6.08	6.71	3.53	0.000885	0.0136	0.59	1.51	leukemia inhibitory factor receptor [Source:MGI Symbol;Acc:MGI:96788]
Mid2	6.01	6.5	3.53	0.000887	0.0136	0.582	1.5	midline 2 [Source:MGI Symbol;Acc:MGI:1344333]
Slc9a3r2	5.39	4.85	-3.53	0.000887	0.0136	-0.607	-1.52	solute carrier family 9 (sodium/hydrogen exchanger), member 3 regulator 2 [Source:MGI Symbol;Acc:MGI:1890662]
Ubtf	6.35	5.83	-3.53	0.000891	0.0137	-0.567	-1.48	upstream binding transcription factor, RNA polymerase I [Source:MGI Symbol;Acc:MGI:98512]
Dhx36	6.98	7.39	3.53	0.000892	0.0137	0.486	1.4	DEAH (Asp-Glu-Ala-His) box polypeptide 36 [Source:MGI Symbol;Acc:MGI:1919412]
1700071M16Rik	0.551	1.79	3.53	0.000895	0.0137	1.29	2.44	RIKEN cDNA 1700071M16 gene [Source:MGI Symbol;Acc:MGI:1920754]
Cfap53	0.0128	-2.04	-3.53	0.000895	0.0137	-2.04	-4.1	cilia and flagella associated protein 53 [Source:MGI Symbol;Acc:MGI:1921703]
Ttc7	3.36	2.82	-3.53	0.000895	0.0137	-0.646	-1.57	tetratricopeptide repeat domain 7 [Source:MGI Symbol;Acc:MGI:1920999]
Rpusd3	3.22	2.67	-3.53	0.000898	0.0137	-0.721	-1.65	RNA pseudouridylate synthase domain containing 3 [Source:MGI Symbol;Acc:MGI:2141440]
Gm28933	4.47	4.89	3.53	0.0009	0.0138	0.531	1.44	predicted gene 28933 [Source:MGI Symbol;Acc:MGI:5579639]
Nat14	5.21	4.54	-3.53	0.000903	0.0138	-0.602	-1.52	N-acetyltransferase 14 [Source:MGI Symbol;Acc:MGI:3039561]
Zfp292	5.41	5.98	3.53	0.000905	0.0138	0.607	1.52	zinc finger protein 292 [Source:MGI Symbol;Acc:MGI:1353423]
Vps13a	4.6	5.46	3.52	0.000907	0.0138	0.829	1.78	vacuolar protein sorting 13A (yeast) [Source:MGI Symbol;Acc:MGI:2444304]
Gtpbp3	4.87	4.41	-3.52	0.00091	0.0139	-0.6	-1.52	GTP binding protein 3 [Source:MGI Symbol;Acc:MGI:1917609]
Ccdc78	1.02	-0.515	-3.52	0.000911	0.0139	-1.43	-2.69	coiled-coil domain containing 78 [Source:MGI Symbol;Acc:MGI:2685784]
Pcid2	4.62	4.29	-3.52	0.000913	0.0139	-0.392	-1.31	PCI domain containing 2 [Source:MGI Symbol;Acc:MGI:2443003]
Plekhg4	2.98	2.51	-3.52	0.000916	0.0139	-0.749	-1.68	pleckstrin homology domain containing, family G (with RhoGef domain) member 4 [Source:MGI Symbol;Acc:MGI:2142544]
NA	3.4	4.03	3.52	0.000917	0.0139	0.697	1.62	NA
Igfbp3	3.67	3.15	-3.52	0.000917	0.0139	-0.607	-1.52	insulin-like growth factor binding protein 3 [Source:MGI Symbol;Acc:MGI:96438]
Fam120c	5.44	6.43	3.52	0.000918	0.0139	0.867	1.82	family with sequence similarity 120, member C [Source:MGI Symbol;Acc:MGI:2387687]
Maf1	5.31	4.71	-3.52	0.000919	0.0139	-0.774	-1.71	MAF1 homolog (S. cerevisiae) [Source:MGI Symbol;Acc:MGI:1916127]
Pafah1b3	4.73	3.86	-3.52	0.000919	0.0139	-0.876	-1.84	platelet-activating factor acetylhydrolase, isoform 1b, subunit 3 [Source:MGI Symbol;Acc:MGI:108414]
Mpdu1	4.87	4.25	-3.52	0.000925	0.014	-0.718	-1.64	mannose-P-dolichol utilization defect 1 [Source:MGI Symbol;Acc:MGI:1346040]
Smek2	5.7	6.31	3.52	0.000926	0.014	0.682	1.6	SMEK homolog 2, suppressor of mek1 (Dictyostelium) [Source:MGI Symbol;Acc:MGI:2144474]
Ly6h	8.17	7.52	-3.52	0.000926	0.014	-0.661	-1.58	lymphocyte antigen 6 complex, locus H [Source:MGI Symbol;Acc:MGI:1346030]
Gltscr1	3.66	3.26	-3.52	0.000927	0.014	-0.678	-1.6	glioma tumor suppressor candidate region gene 1 [Source:MGI Symbol;Acc:MGI:2154263]
Tmem176a	4.33	3.73	-3.52	0.000929	0.014	-0.731	-1.66	transmembrane protein 176A [Source:MGI Symbol;Acc:MGI:1913308]
Zfp444	4.35	3.92	-3.52	0.000931	0.014	-0.531	-1.44	zinc finger protein 444 [Source:MGI Symbol;Acc:MGI:1923365]
Tnpo1	6.21	7.02	3.52	0.000932	0.014	0.81	1.75	transportin 1 [Source:MGI Symbol;Acc:MGI:2681523]
Rgag4	6.64	6.1	-3.52	0.000933	0.014	-0.617	-1.53	retrotransposon gag domain containing 4 [Source:MGI Symbol;Acc:MGI:3045324]
Ddx54	4.85	4.34	-3.51	0.000934	0.014	-0.684	-1.61	DEAD (Asp-Glu-Ala-Asp) box polypeptide 54 [Source:MGI Symbol;Acc:MGI:1919240]
Fbxo6	4.52	3.91	-3.51	0.000935	0.014	-0.538	-1.45	F-box protein 6 [Source:MGI Symbol;Acc:MGI:1354743]
Parn	4.87	4.51	-3.51	0.000936	0.014	-0.412	-1.33	poly(A)-specific ribonuclease (deadenylation nuclease) [Source:MGI Symbol;Acc:MGI:1921358]
Srrm3	5.18	4.65	-3.51	0.000937	0.014	-0.605	-1.52	serine/arginine repetitive matrix 3 [Source:MGI Symbol;Acc:MGI:1920309]
Mta2	5.1	4.78	-3.51	0.000937	0.014	-0.467	-1.38	metastasis-associated gene family, member 2 [Source:MGI Symbol;Acc:MGI:1346340]
Trmt1	6.3	5.96	-3.51	0.000937	0.014	-0.416	-1.33	tRNA methyltransferase 1 [Source:MGI Symbol;Acc:MGI:1289155]
Ap5m1	3.78	4.45	3.51	0.000946	0.0141	0.727	1.65	adaptor-related protein complex 5, mu 1 subunit [Source:MGI Symbol;Acc:MGI:1921635]
Rbm10	5.47	4.99	-3.51	0.000954	0.0142	-0.571	-1.49	RNA binding motif protein 10 [Source:MGI Symbol;Acc:MGI:2384310]
Gm37694	0.555	1.41	3.51	0.000955	0.0142	1.77	3.41	predicted gene, 37694 [Source:MGI Symbol;Acc:MGI:5610922]
Stk16	5.26	4.8	-3.51	0.000958	0.0143	-0.654	-1.57	serine/threonine kinase 16 [Source:MGI Symbol;Acc:MGI:1313271]
Dpp8	6.61	7.43	3.51	0.000959	0.0143	0.693	1.62	dipeptidylpeptidase 8 [Source:MGI Symbol;Acc:MGI:1921638]
Dedd2	3.25	2.69	-3.51	0.000962	0.0143	-0.84	-1.79	death effector domain-containing DNA binding protein 2 [Source:MGI Symbol;Acc:MGI:1914629]
Csmd3	4.66	5.6	3.5	0.000964	0.0143	0.886	1.85	CUB and Sushi multiple domains 3 [Source:MGI Symbol;Acc:MGI:2386403]
Ccng1	6.11	6.7	3.5	0.000965	0.0143	0.757	1.69	cyclin G1 [Source:MGI Symbol;Acc:MGI:102890]
Sacm1l	6.91	7.42	3.5	0.000966	0.0143	0.518	1.43	SAC1 (suppressor of actin mutations 1, homolog)-like (S. cerevisiae) [Source:MGI Symbol;Acc:MGI:1933169]
C330007P06Rik	5.15	5.62	3.5	0.000967	0.0143	0.546	1.46	RIKEN cDNA C330007P06 gene [Source:MGI Symbol;Acc:MGI:1924894]
Nicn1	6.36	6.06	-3.5	0.000969	0.0143	-0.419	-1.34	nicolin 1 [Source:MGI Symbol;Acc:MGI:1913507]
Ankhd1	5.58	6.02	3.5	0.000971	0.0143	0.491	1.41	ankyrin repeat and KH domain containing 1 [Source:MGI Symbol;Acc:MGI:1921733]
Galnt18	4.53	3.97	-3.5	0.000971	0.0143	-0.771	-1.71	UDP-N-acetyl-alpha-D-galactosamine:polypeptide N-acetylgalactosaminyltransferase 18 [Source:MGI Symbol;Acc:MGI:2446239]
Ccdc43	4.35	4.83	3.5	0.000972	0.0143	0.751	1.68	coiled-coil domain containing 43 [Source:MGI Symbol;Acc:MGI:1289318]
Pno1	4.07	4.65	3.5	0.000973	0.0143	0.694	1.62	partner of NOB1 homolog (S. cerevisiae) [Source:MGI Symbol;Acc:MGI:1913499]
Kat8	4.08	3.78	-3.5	0.000973	0.0143	-0.485	-1.4	K(lysine) acetyltransferase 8 [Source:MGI Symbol;Acc:MGI:1915023]
Tmem170	1.39	2.24	3.5	0.000973	0.0143	1.26	2.39	transmembrane protein 170 [Source:MGI Symbol;Acc:MGI:106426]
Vps54	5.62	6.08	3.5	0.000973	0.0143	0.574	1.49	vacuolar protein sorting 54 (yeast) [Source:MGI Symbol;Acc:MGI:2178798]
Fbxo10	6.68	6.15	-3.5	0.000978	0.0144	-0.588	-1.5	F-box protein 10 [Source:MGI Symbol;Acc:MGI:2686937]
Ece1	6.63	6.23	-3.5	0.000978	0.0144	-0.439	-1.36	endothelin converting enzyme 1 [Source:MGI Symbol;Acc:MGI:1101357]
Cntnap5b	3.89	4.72	3.5	0.000981	0.0144	0.968	1.96	contactin associated protein-like 5B [Source:MGI Symbol;Acc:MGI:3664583]
Actr10	6.88	7.19	3.5	0.000983	0.0144	0.352	1.28	ARP10 actin-related protein 10 [Source:MGI Symbol;Acc:MGI:1891654]
Rbm12	4.25	4.61	3.5	0.000985	0.0145	0.557	1.47	RNA binding motif protein 12 [Source:MGI Symbol;Acc:MGI:1922960]
Pias2	6.29	6.69	3.5	0.000987	0.0145	0.494	1.41	protein inhibitor of activated STAT 2 [Source:MGI Symbol;Acc:MGI:1096566]
Pim2	4.75	4.32	-3.5	0.000989	0.0145	-0.471	-1.39	proviral integration site 2 [Source:MGI Symbol;Acc:MGI:97587]
Zbtb37	2.73	3.93	3.5	0.000992	0.0145	1.12	2.17	zinc finger and BTB domain containing 37 [Source:MGI Symbol;Acc:MGI:2444467]
Prr7	3.51	2.59	-3.49	0.000992	0.0145	-1.1	-2.14	proline rich 7 (synaptic) [Source:MGI Symbol;Acc:MGI:3487246]
Gm4969	-2.07	-0.493	3.49	0.000994	0.0145	1.9	3.72	predicted gene 4969 [Source:MGI Symbol;Acc:MGI:3647482]
Gpr17	5.48	5.01	-3.49	0.000996	0.0145	-0.516	-1.43	G protein-coupled receptor 17 [Source:MGI Symbol;Acc:MGI:3584514]
Nabp1	3.51	4.09	3.49	0.000997	0.0145	0.757	1.69	nucleic acid binding protein 1 [Source:MGI Symbol;Acc:MGI:1923258]
Slc7a2	4.76	5.29	3.49	0.000998	0.0145	0.555	1.47	solute carrier family 7 (cationic amino acid transporter, y+ system), member 2 [Source:MGI Symbol;Acc:MGI:99828]
Zfp329	4.93	5.33	3.49	0.000999	0.0145	0.507	1.42	zinc finger protein 329 [Source:MGI Symbol;Acc:MGI:1921283]
Nbea	7.81	8.39	3.49	0.001	0.0145	0.628	1.55	neurobeachin [Source:MGI Symbol;Acc:MGI:1347075]
Slc25a39	6.06	5.49	-3.49	0.001	0.0145	-0.697	-1.62	solute carrier family 25, member 39 [Source:MGI Symbol;Acc:MGI:1196386]
St6galnac3	3.71	4.35	3.49	0.001	0.0145	0.63	1.55	ST6 (alpha-N-acetyl-neuraminyl-2,3-beta-galactosyl-1,3)-N-acetylgalactosaminide alpha-2,6-sialyltransferase 3 [Source:MGI Symbol;Acc:MGI:1341828]
Pbx2	5.56	5.15	-3.49	0.001	0.0145	-0.474	-1.39	pre B cell leukemia homeobox 2 [Source:MGI Symbol;Acc:MGI:1341793]
Man2b2	5.21	4.83	-3.49	0.001	0.0145	-0.502	-1.42	mannosidase 2, alpha B2 [Source:MGI Symbol;Acc:MGI:1195262]
Wnk3	5.57	6.24	3.49	0.001	0.0145	0.804	1.75	WNK lysine deficient protein kinase 3 [Source:MGI Symbol;Acc:MGI:2652875]
Gfod2	4.94	4.22	-3.49	0.001	0.0145	-0.703	-1.63	glucose-fructose oxidoreductase domain containing 2 [Source:MGI Symbol;Acc:MGI:1917825]
Farsa	5.26	4.93	-3.49	0.001	0.0145	-0.397	-1.32	phenylalanyl-tRNA synthetase, alpha subunit [Source:MGI Symbol;Acc:MGI:1913840]
Ythdc2	4.79	5.35	3.49	0.00101	0.0145	0.538	1.45	YTH domain containing 2 [Source:MGI Symbol;Acc:MGI:2448561]
Gm37459	2.61	3.68	3.49	0.00101	0.0145	0.85	1.8	predicted gene, 37459 [Source:MGI Symbol;Acc:MGI:5610687]
Fbxo8	4.75	5.28	3.49	0.00101	0.0145	0.682	1.6	F-box protein 8 [Source:MGI Symbol;Acc:MGI:1354696]
Appl1	6.98	7.38	3.49	0.00101	0.0145	0.493	1.41	adaptor protein, phosphotyrosine interaction, PH domain and leucine zipper containing 1 [Source:MGI Symbol;Acc:MGI:1920243]
Acr	2.35	1.61	-3.49	0.00101	0.0146	-0.892	-1.86	acrosin prepropeptide [Source:MGI Symbol;Acc:MGI:87884]
Rac3	5.44	4.64	-3.49	0.00101	0.0145	-0.876	-1.84	RAS-related C3 botulinum substrate 3 [Source:MGI Symbol;Acc:MGI:2180784]
Syncrip	5.96	6.48	3.49	0.00101	0.0145	0.752	1.68	synaptotagmin binding, cytoplasmic RNA interacting protein [Source:MGI Symbol;Acc:MGI:1891690]
Lonp1	5.99	5.43	-3.48	0.00102	0.0147	-0.732	-1.66	lon peptidase 1, mitochondrial [Source:MGI Symbol;Acc:MGI:1921392]
Pcsk6	4.65	4.27	-3.49	0.00102	0.0146	-0.607	-1.52	proprotein convertase subtilisin/kexin type 6 [Source:MGI Symbol;Acc:MGI:102897]
Bsdc1	5.73	5.37	-3.48	0.00102	0.0147	-0.441	-1.36	BSD domain containing 1 [Source:MGI Symbol;Acc:MGI:1913466]
Fam159a	0.833	-0.354	-3.48	0.00103	0.0148	-1.44	-2.71	family with sequence similarity 159, member A [Source:MGI Symbol;Acc:MGI:3651644]
Arhgef12	7.77	8.27	3.48	0.00103	0.0147	0.439	1.36	Rho guanine nucleotide exchange factor (GEF) 12 [Source:MGI Symbol;Acc:MGI:1916882]
Snhg14	6.94	7.63	3.48	0.00103	0.0147	0.765	1.7	small nucleolar RNA host gene 14 [Source:MGI Symbol;Acc:MGI:1289201]
Dscaml1	4.96	4.55	-3.48	0.00103	0.0147	-0.622	-1.54	Down syndrome cell adhesion molecule like 1 [Source:MGI Symbol;Acc:MGI:2150309]
Pak1ip1	5.83	5.44	-3.48	0.00103	0.0148	-0.399	-1.32	PAK1 interacting protein 1 [Source:MGI Symbol;Acc:MGI:1915333]
Zfp81	4.19	4.75	3.48	0.00104	0.0148	0.687	1.61	zinc finger protein 81 [Source:MGI Symbol;Acc:MGI:1890752]
D2Wsu81e	4.36	3.83	-3.48	0.00104	0.0148	-0.782	-1.72	DNA segment, Chr 2, Wayne State University 81, expressed [Source:MGI Symbol;Acc:MGI:106544]
Elavl2	7.59	8.06	3.48	0.00104	0.0148	0.622	1.54	ELAV (embryonic lethal, abnormal vision, Drosophila)-like 2 (Hu antigen B) [Source:MGI Symbol;Acc:MGI:1100887]
Usp15	6.11	6.6	3.48	0.00104	0.0148	0.51	1.42	ubiquitin specific peptidase 15 [Source:MGI Symbol;Acc:MGI:101857]
Gm16503	-1.33	0.601	3.48	0.00104	0.0148	2.43	5.39	predicted gene 16503 [Source:MGI Symbol;Acc:MGI:3642127]
Manbal	4.71	4.29	-3.48	0.00104	0.0148	-0.524	-1.44	mannosidase, beta A, lysosomal-like [Source:MGI Symbol;Acc:MGI:1916411]
Gmps	7.47	8	3.48	0.00104	0.0148	0.678	1.6	guanine monophosphate synthetase [Source:MGI Symbol;Acc:MGI:2448526]
Axin1	4.64	4.22	-3.48	0.00105	0.0148	-0.571	-1.49	axin 1 [Source:MGI Symbol;Acc:MGI:1096327]
Zfyve16	4.53	5.22	3.48	0.00105	0.0148	0.628	1.55	zinc finger, FYVE domain containing 16 [Source:MGI Symbol;Acc:MGI:2145181]
Palm2	3.1	4.31	3.47	0.00106	0.015	1.07	2.1	paralemmin 2 [Source:MGI Symbol;Acc:MGI:1934601]
Cdc42bpa	8.13	8.69	3.47	0.00106	0.0149	0.432	1.35	CDC42 binding protein kinase alpha [Source:MGI Symbol;Acc:MGI:2441841]
Fbxl14	4.95	4.49	-3.47	0.00106	0.015	-0.589	-1.5	F-box and leucine-rich repeat protein 14 [Source:MGI Symbol;Acc:MGI:2141676]
Vps9d1	5.55	5.12	-3.47	0.00106	0.015	-0.6	-1.52	VPS9 domain containing 1 [Source:MGI Symbol;Acc:MGI:1914143]
Polm	3.7	3.22	-3.47	0.00106	0.0149	-0.598	-1.51	polymerase (DNA directed), mu [Source:MGI Symbol;Acc:MGI:1860191]
Zcchc11	5.38	5.92	3.47	0.00106	0.0149	0.568	1.48	zinc finger, CCHC domain containing 11 [Source:MGI Symbol;Acc:MGI:2445126]
Gm14325	1.36	2.19	3.47	0.00106	0.015	1.22	2.33	predicted gene 14325 [Source:MGI Symbol;Acc:MGI:3702875]
Igf1	2.95	3.66	3.47	0.00106	0.0149	0.85	1.8	insulin-like growth factor 1 [Source:MGI Symbol;Acc:MGI:96432]
Rnd3	5.32	4.86	-3.47	0.00107	0.0151	-0.476	-1.39	Rho family GTPase 3 [Source:MGI Symbol;Acc:MGI:1921444]
Tmem68	5.22	5.72	3.47	0.00107	0.015	0.666	1.59	transmembrane protein 68 [Source:MGI Symbol;Acc:MGI:1919348]
Socs4	4.24	4.85	3.47	0.00107	0.0151	0.702	1.63	suppressor of cytokine signaling 4 [Source:MGI Symbol;Acc:MGI:1914546]
Heatr3	5.5	5.73	3.47	0.00107	0.015	0.445	1.36	HEAT repeat containing 3 [Source:MGI Symbol;Acc:MGI:2444491]
Fbxw23	1.94	1.32	-3.47	0.00108	0.0151	-0.942	-1.92	F-box and WD-40 domain protein 23 [Source:MGI Symbol;Acc:MGI:3779686]
Surf6	4.22	3.9	-3.47	0.00108	0.0151	-0.523	-1.44	surfeit gene 6 [Source:MGI Symbol;Acc:MGI:98447]
Kit	4.44	5.29	3.47	0.00108	0.0151	0.696	1.62	kit oncogene [Source:MGI Symbol;Acc:MGI:96677]
Abca6	1.31	2.44	3.47	0.00108	0.0151	1	2	ATP-binding cassette, sub-family A (ABC1), member 6 [Source:MGI Symbol;Acc:MGI:1923434]
Cd2ap	5.09	5.65	3.47	0.00108	0.0151	0.671	1.59	CD2-associated protein [Source:MGI Symbol;Acc:MGI:1330281]
Gm29609	1.1	2.01	3.47	0.00108	0.0151	1.19	2.28	predicted gene 29609 [Source:MGI Symbol;Acc:MGI:5580315]
Noc2l	6.11	5.64	-3.47	0.00108	0.0151	-0.563	-1.48	nucleolar complex associated 2 homolog (S. cerevisiae) [Source:MGI Symbol;Acc:MGI:1931051]
Eno3	4.59	3.88	-3.46	0.00109	0.0152	-0.668	-1.59	enolase 3, beta muscle [Source:MGI Symbol;Acc:MGI:95395]
Chga	7.85	7.29	-3.46	0.00109	0.0152	-0.557	-1.47	chromogranin A [Source:MGI Symbol;Acc:MGI:88394]
Pdlim4	3.93	3.23	-3.46	0.00109	0.0152	-0.728	-1.66	PDZ and LIM domain 4 [Source:MGI Symbol;Acc:MGI:1353470]
Kif5c	9.65	9.97	3.46	0.00109	0.0152	0.324	1.25	kinesin family member 5C [Source:MGI Symbol;Acc:MGI:1098269]
6330408A02Rik	4.02	3.58	-3.46	0.00109	0.0152	-0.507	-1.42	RIKEN cDNA 6330408A02 gene [Source:MGI Symbol;Acc:MGI:2447816]
Rnmtl1	3.09	2.43	-3.46	0.00109	0.0152	-0.847	-1.8	RNA methyltransferase like 1 [Source:MGI Symbol;Acc:MGI:1914640]
Tmem259	5.87	5.3	-3.46	0.00109	0.0152	-0.84	-1.79	transmembrane protein 259 [Source:MGI Symbol;Acc:MGI:2177957]
2018-09-07	8.05	8.42	3.46	0.00109	0.0152	0.464	1.38	septin 7 [Source:MGI Symbol;Acc:MGI:1335094]
Gm42837	-3.02	-0.86	3.46	0.0011	0.0152	2.38	5.21	predicted gene 42837 [Source:MGI Symbol;Acc:MGI:5662974]
Ebna1bp2	5.61	5.36	-3.46	0.0011	0.0152	-0.335	-1.26	EBNA1 binding protein 2 [Source:MGI Symbol;Acc:MGI:1916322]
Gm10558	-1.19	0.0497	3.46	0.0011	0.0152	2.55	5.84	predicted gene 10558 [Source:MGI Symbol;Acc:MGI:3642906]
Pex2	4.32	4.61	3.46	0.0011	0.0152	0.446	1.36	peroxisomal biogenesis factor 2 [Source:MGI Symbol;Acc:MGI:107486]
Hcn1	3.38	4.24	3.46	0.0011	0.0152	0.821	1.77	hyperpolarization-activated, cyclic nucleotide-gated K+ 1 [Source:MGI Symbol;Acc:MGI:1096392]
1810034E14Rik	-1.23	0.857	3.46	0.0011	0.0152	2.17	4.51	RIKEN cDNA 1810034E14 gene [Source:MGI Symbol;Acc:MGI:1913753]
Lmbrd1	7.98	8.31	3.46	0.0011	0.0152	0.323	1.25	LMBR1 domain containing 1 [Source:MGI Symbol;Acc:MGI:1915671]
Il20rb	0.547	-0.846	-3.46	0.00111	0.0153	-1.44	-2.71	interleukin 20 receptor beta [Source:MGI Symbol;Acc:MGI:2143266]
Zfp369	3.2	4.01	3.46	0.00111	0.0153	1.09	2.12	zinc finger protein 369 [Source:MGI Symbol;Acc:MGI:2176229]
Foxn3	3.61	4.5	3.46	0.00111	0.0153	0.788	1.73	forkhead box N3 [Source:MGI Symbol;Acc:MGI:1918625]
Zfp597	4.47	4.91	3.46	0.00111	0.0153	0.545	1.46	zinc finger protein 597 [Source:MGI Symbol;Acc:MGI:1918313]
Hif1a	6.4	6.94	3.46	0.00111	0.0153	0.565	1.48	hypoxia inducible factor 1, alpha subunit [Source:MGI Symbol;Acc:MGI:106918]
Zfp553	4.55	4.13	-3.46	0.00111	0.0153	-0.503	-1.42	zinc finger protein 553 [Source:MGI Symbol;Acc:MGI:2384725]
Hap1	10.2	9.51	-3.46	0.00111	0.0153	-0.686	-1.61	huntingtin-associated protein 1 [Source:MGI Symbol;Acc:MGI:1261831]
Slc52a2	3.98	3.46	-3.46	0.00111	0.0153	-0.613	-1.53	solute carrier protein 52, member 2 [Source:MGI Symbol;Acc:MGI:1289288]
Ccar2	6.76	6.49	-3.45	0.00112	0.0153	-0.4	-1.32	cell cycle activator and apoptosis regulator 2 [Source:MGI Symbol;Acc:MGI:2444228]
Ube2o	7.76	7.52	-3.46	0.00112	0.0153	-0.42	-1.34	ubiquitin-conjugating enzyme E2O [Source:MGI Symbol;Acc:MGI:2444266]
Pigo	4.8	4.42	-3.45	0.00112	0.0153	-0.519	-1.43	phosphatidylinositol glycan anchor biosynthesis, class O [Source:MGI Symbol;Acc:MGI:1861452]
Kri1	3.79	3.27	-3.45	0.00112	0.0154	-0.646	-1.56	KRI1 homolog (S. cerevisiae) [Source:MGI Symbol;Acc:MGI:2384899]
Ogfod2	4.73	4.13	-3.45	0.00113	0.0154	-0.717	-1.64	2-oxoglutarate and iron-dependent oxygenase domain containing 2 [Source:MGI Symbol;Acc:MGI:1913877]
Gstm6	4.47	3.88	-3.45	0.00113	0.0154	-0.629	-1.55	glutathione S-transferase, mu 6 [Source:MGI Symbol;Acc:MGI:1309467]
Eif4g2	9.12	9.58	3.45	0.00113	0.0154	0.499	1.41	eukaryotic translation initiation factor 4, gamma 2 [Source:MGI Symbol;Acc:MGI:109207]
Ranbp6	6.25	6.65	3.45	0.00113	0.0154	0.447	1.36	RAN binding protein 6 [Source:MGI Symbol;Acc:MGI:2683212]
Efs	4.08	3.49	-3.45	0.00113	0.0154	-0.71	-1.64	embryonal Fyn-associated substrate [Source:MGI Symbol;Acc:MGI:105311]
Ano8	5.93	5.46	-3.45	0.00113	0.0154	-0.7	-1.62	anoctamin 8 [Source:MGI Symbol;Acc:MGI:2687327]
Tarbp2	4.11	3.48	-3.45	0.00113	0.0154	-0.758	-1.69	TAR (HIV) RNA binding protein 2 [Source:MGI Symbol;Acc:MGI:103027]
Atad2	2.33	3.02	3.45	0.00114	0.0155	0.93	1.91	ATPase family, AAA domain containing 2 [Source:MGI Symbol;Acc:MGI:1917722]
Vps13b	5.86	6.54	3.45	0.00114	0.0155	0.684	1.61	vacuolar protein sorting 13B (yeast) [Source:MGI Symbol;Acc:MGI:1916380]
Dbnl	6.02	5.51	-3.45	0.00114	0.0155	-0.548	-1.46	drebrin-like [Source:MGI Symbol;Acc:MGI:700006]
Paqr8	8.17	8.6	3.45	0.00114	0.0155	0.426	1.34	progestin and adipoQ receptor family member VIII [Source:MGI Symbol;Acc:MGI:1921479]
Zbtb22	3.98	3.56	-3.45	0.00115	0.0155	-0.732	-1.66	zinc finger and BTB domain containing 22 [Source:MGI Symbol;Acc:MGI:1931870]
Mga	6.38	7	3.44	0.00116	0.0156	0.668	1.59	MAX gene associated [Source:MGI Symbol;Acc:MGI:1352483]
Gm26809	1.63	2.51	3.44	0.00116	0.0157	1.15	2.22	predicted gene, 26809 [Source:MGI Symbol;Acc:MGI:5477303]
Mpp5	6.14	6.6	3.44	0.00116	0.0156	0.481	1.4	membrane protein, palmitoylated 5 (MAGUK p55 subfamily member 5) [Source:MGI Symbol;Acc:MGI:1927339]
Sdccag8	4.56	4.07	-3.44	0.00116	0.0157	-0.422	-1.34	serologically defined colon cancer antigen 8 [Source:MGI Symbol;Acc:MGI:1924066]
Fut9	5.95	6.75	3.44	0.00116	0.0156	0.865	1.82	fucosyltransferase 9 [Source:MGI Symbol;Acc:MGI:1330859]
Bahd1	4.51	3.96	-3.44	0.00116	0.0157	-0.611	-1.53	bromo adjacent homology domain containing 1 [Source:MGI Symbol;Acc:MGI:2139371]
Gm37181	0.539	2.41	3.44	0.00117	0.0157	2.01	4.02	predicted gene, 37181 [Source:MGI Symbol;Acc:MGI:5610409]
Pkmyt1	1.83	0.876	-3.44	0.00117	0.0157	-1.25	-2.37	protein kinase, membrane associated tyrosine/threonine 1 [Source:MGI Symbol;Acc:MGI:2137630]
Shprh	5.31	5.96	3.44	0.00117	0.0157	0.607	1.52	SNF2 histone linker PHD RING helicase [Source:MGI Symbol;Acc:MGI:1917581]
Swi5	6.79	6.38	-3.44	0.00117	0.0157	-0.449	-1.37	SWI5 recombination repair homolog (yeast) [Source:MGI Symbol;Acc:MGI:1920181]
Rabl6	7.31	6.82	-3.44	0.00117	0.0157	-0.404	-1.32	RAB, member RAS oncogene family-like 6 [Source:MGI Symbol;Acc:MGI:2442633]
Adam9	5.78	6.21	3.44	0.00117	0.0157	0.405	1.32	a disintegrin and metallopeptidase domain 9 (meltrin gamma) [Source:MGI Symbol;Acc:MGI:105376]
Polr3gl	4.43	3.92	-3.44	0.00117	0.0157	-0.575	-1.49	polymerase (RNA) III (DNA directed) polypeptide G like [Source:MGI Symbol;Acc:MGI:1917120]
Klhl36	2.98	2.49	-3.44	0.00117	0.0157	-0.701	-1.63	kelch-like 36 [Source:MGI Symbol;Acc:MGI:2385305]
5330434G04Rik	3.5	4.03	3.44	0.00117	0.0157	0.703	1.63	RIKEN cDNA 5330434G04 gene [Source:MGI Symbol;Acc:MGI:1925519]
Gm25047	0.475	1.64	3.44	0.00118	0.0158	1.17	2.25	predicted gene, 25047 [Source:MGI Symbol;Acc:MGI:5454824]
Fam179b	5.27	5.86	3.44	0.00118	0.0158	0.563	1.48	family with sequence similarity 179, member B [Source:MGI Symbol;Acc:MGI:2684313]
Hectd2	2.2	3.58	3.44	0.00118	0.0157	1.21	2.32	HECT domain containing 2 [Source:MGI Symbol;Acc:MGI:2442663]
Tanc2	8.08	8.4	3.44	0.00118	0.0158	0.496	1.41	tetratricopeptide repeat, ankyrin repeat and coiled-coil containing 2 [Source:MGI Symbol;Acc:MGI:2444121]
Celf6	6.31	5.81	-3.44	0.00118	0.0158	-0.559	-1.47	CUGBP, Elav-like family member 6 [Source:MGI Symbol;Acc:MGI:1923433]
Mcc	5.46	6.12	3.44	0.00118	0.0158	0.626	1.54	mutated in colorectal cancers [Source:MGI Symbol;Acc:MGI:96930]
Nup62cl	1.3	0.118	-3.43	0.00119	0.0158	-1.14	-2.2	nucleoporin 62 C-terminal like [Source:MGI Symbol;Acc:MGI:2685565]
Nle1	3.14	2.69	-3.44	0.00119	0.0158	-0.612	-1.53	notchless homolog 1 (Drosophila) [Source:MGI Symbol;Acc:MGI:2429770]
Gadd45g	4.33	3.59	-3.44	0.00119	0.0158	-0.869	-1.83	growth arrest and DNA-damage-inducible 45 gamma [Source:MGI Symbol;Acc:MGI:1346325]
Otof	6.03	5.49	-3.43	0.00119	0.0158	-0.697	-1.62	otoferlin [Source:MGI Symbol;Acc:MGI:1891247]
Dclk3	3.81	3.04	-3.43	0.00119	0.0158	-0.962	-1.95	doublecortin-like kinase 3 [Source:MGI Symbol;Acc:MGI:3039580]
Mrpl2	3.73	3.13	-3.43	0.00119	0.0158	-0.858	-1.81	mitochondrial ribosomal protein L2 [Source:MGI Symbol;Acc:MGI:1351622]
Ptbp2	7.95	8.5	3.43	0.0012	0.0159	0.634	1.55	polypyrimidine tract binding protein 2 [Source:MGI Symbol;Acc:MGI:1860489]
Sphk2	4.81	4.32	-3.43	0.0012	0.0159	-0.693	-1.62	sphingosine kinase 2 [Source:MGI Symbol;Acc:MGI:1861380]
Swt1	3.86	4.19	3.43	0.0012	0.0159	0.591	1.51	SWT1 RNA endoribonuclease homolog (S. cerevisiae) [Source:MGI Symbol;Acc:MGI:1914125]
Rgs7bp	6.3	6.88	3.43	0.0012	0.0159	0.786	1.72	regulator of G-protein signalling 7 binding protein [Source:MGI Symbol;Acc:MGI:106334]
Fam171a2	5.58	5.03	-3.43	0.0012	0.0159	-0.707	-1.63	family with sequence similarity 171, member A2 [Source:MGI Symbol;Acc:MGI:2448496]
Kdm5d	5.12	5.53	3.43	0.00121	0.016	0.442	1.36	lysine (K)-specific demethylase 5D [Source:MGI Symbol;Acc:MGI:99780]
Slc46a1	4.23	3.68	-3.43	0.00121	0.0159	-0.574	-1.49	solute carrier family 46, member 1 [Source:MGI Symbol;Acc:MGI:1098733]
Smchd1	5.44	5.77	3.43	0.00121	0.0159	0.495	1.41	SMC hinge domain containing 1 [Source:MGI Symbol;Acc:MGI:1921605]
Ifit1	1.4	2.16	3.43	0.00121	0.016	1.02	2.03	interferon-induced protein with tetratricopeptide repeats 1 [Source:MGI Symbol;Acc:MGI:99450]
Gm42770	1.64	3.39	3.43	0.00122	0.016	1.86	3.62	predicted gene 42770 [Source:MGI Symbol;Acc:MGI:5662907]
Scamp1	8.24	8.56	3.43	0.00122	0.016	0.425	1.34	secretory carrier membrane protein 1 [Source:MGI Symbol;Acc:MGI:1349480]
Urm1	4.85	4.34	-3.43	0.00122	0.016	-0.634	-1.55	ubiquitin related modifier 1 homolog (S. cerevisiae) [Source:MGI Symbol;Acc:MGI:1915455]
Ctc1	5.77	5.49	-3.43	0.00122	0.016	-0.331	-1.26	CTS telomere maintenance complex component 1 [Source:MGI Symbol;Acc:MGI:1916214]
Pold2	3.3	2.53	-3.43	0.00122	0.016	-0.834	-1.78	polymerase (DNA directed), delta 2, regulatory subunit [Source:MGI Symbol;Acc:MGI:1097163]
Cxadr	4.92	5.45	3.42	0.00123	0.0161	0.475	1.39	coxsackie virus and adenovirus receptor [Source:MGI Symbol;Acc:MGI:1201679]
Lrp10	4.84	4.37	-3.42	0.00123	0.0161	-0.669	-1.59	low-density lipoprotein receptor-related protein 10 [Source:MGI Symbol;Acc:MGI:1929480]
Uhrf1bp1l	5.8	6.26	3.42	0.00123	0.0161	0.446	1.36	UHRF1 (ICBP90) binding protein 1-like [Source:MGI Symbol;Acc:MGI:2442888]
Gm26563	-1.77	-0.0913	3.42	0.00123	0.0161	2.13	4.36	predicted gene, 26563 [Source:MGI Symbol;Acc:MGI:5477057]
Ccdc101	3.21	2.52	-3.42	0.00123	0.0161	-0.914	-1.88	coiled-coil domain containing 101 [Source:MGI Symbol;Acc:MGI:1922815]
Hook3	6.39	6.95	3.42	0.00123	0.0161	0.534	1.45	hook homolog 3 (Drosophila) [Source:MGI Symbol;Acc:MGI:2443554]
Tnxb	3.91	3.28	-3.42	0.00123	0.0161	-0.794	-1.73	tenascin XB [Source:MGI Symbol;Acc:MGI:1932137]
Krit1	5.63	6.11	3.42	0.00123	0.0161	0.547	1.46	KRIT1, ankyrin repeat containing [Source:MGI Symbol;Acc:MGI:1930618]
Gm25117	0.688	2.61	3.42	0.00124	0.0161	3.24	9.48	predicted gene, 25117 [Source:MGI Symbol;Acc:MGI:5454894]
Taok1	6.51	7.3	3.42	0.00124	0.0161	0.789	1.73	TAO kinase 1 [Source:MGI Symbol;Acc:MGI:1914490]
Insr	6.54	7.07	3.42	0.00124	0.0161	0.474	1.39	insulin receptor [Source:MGI Symbol;Acc:MGI:96575]
Actr5	3.62	3.02	-3.42	0.00124	0.0161	-0.639	-1.56	ARP5 actin-related protein 5 [Source:MGI Symbol;Acc:MGI:1924748]
Med12l	5.61	6.42	3.42	0.00125	0.0163	0.644	1.56	mediator complex subunit 12-like [Source:MGI Symbol;Acc:MGI:2139916]
Sirt7	5.11	4.64	-3.42	0.00125	0.0163	-0.608	-1.52	sirtuin 7 [Source:MGI Symbol;Acc:MGI:2385849]
Cdk10	5.63	5.01	-3.42	0.00125	0.0162	-0.529	-1.44	cyclin-dependent kinase 10 [Source:MGI Symbol;Acc:MGI:2448549]
Rbm27	5.29	5.75	3.42	0.00125	0.0162	0.595	1.51	RNA binding motif protein 27 [Source:MGI Symbol;Acc:MGI:2147194]
Sphkap	6.51	7.17	3.42	0.00126	0.0163	0.702	1.63	SPHK1 interactor, AKAP domain containing [Source:MGI Symbol;Acc:MGI:1924879]
Nipa1	4.38	4.98	3.41	0.00126	0.0163	0.608	1.52	non imprinted in Prader-Willi/Angelman syndrome 1 homolog (human) [Source:MGI Symbol;Acc:MGI:2442058]
Usp53	4.29	4.86	3.42	0.00126	0.0163	0.62	1.54	ubiquitin specific peptidase 53 [Source:MGI Symbol;Acc:MGI:2139607]
Gnai2	7.94	7.49	-3.42	0.00126	0.0163	-0.544	-1.46	guanine nucleotide binding protein (G protein), alpha inhibiting 2 [Source:MGI Symbol;Acc:MGI:95772]
Zfp787	2.92	2.08	-3.42	0.00126	0.0163	-1.01	-2.02	zinc finger protein 787 [Source:MGI Symbol;Acc:MGI:1914359]
Tfr2	3.11	2.39	-3.41	0.00126	0.0163	-0.818	-1.76	transferrin receptor 2 [Source:MGI Symbol;Acc:MGI:1354956]
Trp53	4.3	3.92	-3.42	0.00126	0.0163	-0.518	-1.43	transformation related protein 53 [Source:MGI Symbol;Acc:MGI:98834]
Gemin7	4.22	3.65	-3.41	0.00127	0.0164	-0.81	-1.75	gem (nuclear organelle) associated protein 7 [Source:MGI Symbol;Acc:MGI:1916981]
H2-T10	0.539	-1.1	-3.41	0.00127	0.0164	-2.07	-4.19	histocompatibility 2, T region locus 10 [Source:MGI Symbol;Acc:MGI:95942]
Hes6	3.3	2.6	-3.41	0.00127	0.0164	-0.945	-1.93	hairy and enhancer of split 6 [Source:MGI Symbol;Acc:MGI:1859852]
Fsd1	4.33	3.72	-3.41	0.00127	0.0163	-0.864	-1.82	fibronectin type 3 and SPRY domain-containing protein [Source:MGI Symbol;Acc:MGI:1934858]
Agfg1	6.25	6.68	3.41	0.00128	0.0164	0.453	1.37	ArfGAP with FG repeats 1 [Source:MGI Symbol;Acc:MGI:1333754]
Dennd6a	4.61	4.96	3.41	0.00128	0.0164	0.48	1.39	DENN/MADD domain containing 6A [Source:MGI Symbol;Acc:MGI:2442980]
Htr1f	-1.36	0.34	3.41	0.00128	0.0164	1.93	3.82	5-hydroxytryptamine (serotonin) receptor 1F [Source:MGI Symbol;Acc:MGI:99842]
Col7a1	3.32	2.72	-3.41	0.00128	0.0164	-0.705	-1.63	collagen, type VII, alpha 1 [Source:MGI Symbol;Acc:MGI:88462]
Zfp68	5.63	6.1	3.41	0.00128	0.0164	0.566	1.48	zinc finger protein 68 [Source:MGI Symbol;Acc:MGI:1344427]
Banf1	3.23	2.43	-3.41	0.00128	0.0164	-0.912	-1.88	barrier to autointegration factor 1 [Source:MGI Symbol;Acc:MGI:1346330]
Ctbp1	7.56	7.21	-3.41	0.00128	0.0164	-0.431	-1.35	C-terminal binding protein 1 [Source:MGI Symbol;Acc:MGI:1201685]
Cntnap5c	2.77	3.61	3.41	0.00129	0.0165	1.16	2.24	contactin associated protein-like 5C [Source:MGI Symbol;Acc:MGI:3646013]
Abhd16a	6.03	5.57	-3.41	0.00129	0.0165	-0.567	-1.48	abhydrolase domain containing 16A [Source:MGI Symbol;Acc:MGI:99476]
Sqstm1	8.3	7.71	-3.41	0.00129	0.0165	-0.693	-1.62	sequestosome 1 [Source:MGI Symbol;Acc:MGI:107931]
Speg	6.17	5.68	-3.41	0.00129	0.0165	-0.7	-1.62	SPEG complex locus [Source:MGI Symbol;Acc:MGI:109282]
Asf1a	2.61	3.2	3.41	0.00129	0.0165	0.7	1.62	anti-silencing function 1A histone chaperone [Source:MGI Symbol;Acc:MGI:1913653]
Hipk2	6.59	7.31	3.4	0.0013	0.0166	0.771	1.71	homeodomain interacting protein kinase 2 [Source:MGI Symbol;Acc:MGI:1314872]
Peli3	4.85	4.45	-3.4	0.0013	0.0166	-0.623	-1.54	pellino 3 [Source:MGI Symbol;Acc:MGI:1924963]
Trps1	4.17	4.84	3.4	0.00131	0.0167	0.723	1.65	trichorhinophalangeal syndrome I (human) [Source:MGI Symbol;Acc:MGI:1927616]
Atpaf1	5	5.36	3.4	0.00131	0.0167	0.497	1.41	ATP synthase mitochondrial F1 complex assembly factor 1 [Source:MGI Symbol;Acc:MGI:2180560]
Crlf2	3.09	2.43	-3.4	0.00131	0.0167	-1.11	-2.16	cytokine receptor-like factor 2 [Source:MGI Symbol;Acc:MGI:1889506]
Camk2b	9.01	8.56	-3.4	0.00131	0.0167	-0.554	-1.47	calcium/calmodulin-dependent protein kinase II, beta [Source:MGI Symbol;Acc:MGI:88257]
Apbb2	6.5	6.88	3.4	0.00132	0.0167	0.372	1.29	amyloid beta (A4) precursor protein-binding, family B, member 2 [Source:MGI Symbol;Acc:MGI:108405]
Pik3cd	4.69	4.27	-3.4	0.00132	0.0167	-0.59	-1.51	phosphatidylinositol 3-kinase catalytic delta polypeptide [Source:MGI Symbol;Acc:MGI:1098211]
Gpm6b	9.14	9.72	3.4	0.00132	0.0167	0.616	1.53	glycoprotein m6b [Source:MGI Symbol;Acc:MGI:107672]
Ankrd24	6.19	5.89	-3.4	0.00132	0.0167	-0.471	-1.39	ankyrin repeat domain 24 [Source:MGI Symbol;Acc:MGI:1890394]
Ythdf3	5.81	6.31	3.4	0.00132	0.0167	0.587	1.5	YTH domain family 3 [Source:MGI Symbol;Acc:MGI:1918850]
Stt3a	6.29	6.66	3.4	0.00132	0.0167	0.428	1.35	STT3, subunit of the oligosaccharyltransferase complex, homolog A (S. cerevisiae) [Source:MGI Symbol;Acc:MGI:105124]
Zfp644	5.9	6.37	3.4	0.00132	0.0167	0.564	1.48	zinc finger protein 644 [Source:MGI Symbol;Acc:MGI:1277212]
Ercc2	4.81	4.46	-3.4	0.00133	0.0167	-0.559	-1.47	excision repair cross-complementing rodent repair deficiency, complementation group 2 [Source:MGI Symbol;Acc:MGI:95413]
Mysm1	5.04	5.73	3.4	0.00133	0.0167	0.711	1.64	myb-like, SWIRM and MPN domains 1 [Source:MGI Symbol;Acc:MGI:2444584]
Ccp110	6	6.45	3.4	0.00133	0.0167	0.42	1.34	centriolar coiled coil protein 110 [Source:MGI Symbol;Acc:MGI:2141942]
Tchp	4.29	3.82	-3.4	0.00133	0.0167	-0.452	-1.37	trichoplein, keratin filament binding [Source:MGI Symbol;Acc:MGI:1925082]
Pcbp3	5.33	4.92	-3.4	0.00133	0.0167	-0.608	-1.52	poly(rC) binding protein 3 [Source:MGI Symbol;Acc:MGI:1890470]
Zfp148	6.14	6.64	3.4	0.00133	0.0167	0.615	1.53	zinc finger protein 148 [Source:MGI Symbol;Acc:MGI:1332234]
1500011B03Rik	6.24	5.66	-3.4	0.00133	0.0168	-0.583	-1.5	RIKEN cDNA 1500011B03 gene [Source:MGI Symbol;Acc:MGI:1913486]
Krba1	5.88	5.67	-3.39	0.00134	0.0168	-0.404	-1.32	KRAB-A domain containing 1 [Source:MGI Symbol;Acc:MGI:1925077]
Exoc5	5.84	6.25	3.39	0.00134	0.0168	0.492	1.41	exocyst complex component 5 [Source:MGI Symbol;Acc:MGI:2145645]
Tcof1	4.06	3.6	-3.39	0.00135	0.017	-0.594	-1.51	Treacher Collins Franceschetti syndrome 1, homolog [Source:MGI Symbol;Acc:MGI:892003]
Tmx3	6.49	7.04	3.39	0.00135	0.017	0.713	1.64	thioredoxin-related transmembrane protein 3 [Source:MGI Symbol;Acc:MGI:2442418]
Pld3	8.99	8.4	-3.39	0.00135	0.017	-0.622	-1.54	phospholipase D family, member 3 [Source:MGI Symbol;Acc:MGI:1333782]
Laptm4b	6.78	7.14	3.39	0.00135	0.0169	0.432	1.35	lysosomal-associated protein transmembrane 4B [Source:MGI Symbol;Acc:MGI:1890494]
Map3k14	2.51	2	-3.39	0.00136	0.017	-0.776	-1.71	mitogen-activated protein kinase kinase kinase 14 [Source:MGI Symbol;Acc:MGI:1858204]
Ppp1cb	8.46	9	3.39	0.00136	0.017	0.663	1.58	protein phosphatase 1, catalytic subunit, beta isoform [Source:MGI Symbol;Acc:MGI:104871]
Aplp1	9.55	9.15	-3.39	0.00136	0.017	-0.542	-1.46	amyloid beta (A4) precursor-like protein 1 [Source:MGI Symbol;Acc:MGI:88046]
Dmrta2	-0.0528	1.53	3.39	0.00136	0.017	1.66	3.17	doublesex and mab-3 related transcription factor like family A2 [Source:MGI Symbol;Acc:MGI:2653629]
Tmem28	4.37	3.85	-3.39	0.00137	0.017	-0.589	-1.5	transmembrane protein 28 [Source:MGI Symbol;Acc:MGI:3648377]
Rps6ka4	4.87	4.39	-3.39	0.00137	0.017	-0.586	-1.5	ribosomal protein S6 kinase, polypeptide 4 [Source:MGI Symbol;Acc:MGI:1930076]
Hmgcs1	7.58	7.94	3.39	0.00137	0.017	0.432	1.35	3-hydroxy-3-methylglutaryl-Coenzyme A synthase 1 [Source:MGI Symbol;Acc:MGI:107592]
Hivep2	6.15	6.81	3.39	0.00137	0.0171	0.706	1.63	human immunodeficiency virus type I enhancer binding protein 2 [Source:MGI Symbol;Acc:MGI:1338076]
Rhof	4.78	4.28	-3.39	0.00137	0.017	-0.567	-1.48	ras homolog gene family, member f [Source:MGI Symbol;Acc:MGI:1345629]
Dlg5	6.79	6.46	-3.39	0.00137	0.017	-0.5	-1.41	discs, large homolog 5 (Drosophila) [Source:MGI Symbol;Acc:MGI:1918478]
Sp4	4.34	5.1	3.39	0.00137	0.017	0.789	1.73	trans-acting transcription factor 4 [Source:MGI Symbol;Acc:MGI:107595]
Rspry1	5.29	5.72	3.39	0.00137	0.0171	0.658	1.58	ring finger and SPRY domain containing 1 [Source:MGI Symbol;Acc:MGI:1914860]
Aspscr1	5.52	4.95	-3.39	0.00137	0.017	-0.618	-1.53	alveolar soft part sarcoma chromosome region, candidate 1 (human) [Source:MGI Symbol;Acc:MGI:1916188]
Ckap4	4.85	4.43	-3.38	0.00138	0.0171	-0.466	-1.38	cytoskeleton-associated protein 4 [Source:MGI Symbol;Acc:MGI:2444926]
Abcc9	3.53	4.25	3.38	0.00138	0.0171	0.703	1.63	ATP-binding cassette, sub-family C (CFTR/MRP), member 9 [Source:MGI Symbol;Acc:MGI:1352630]
Fam20c	5.84	5.35	-3.38	0.00138	0.0171	-0.574	-1.49	family with sequence similarity 20, member C [Source:MGI Symbol;Acc:MGI:2136853]
Nolc1	5.82	5.36	-3.39	0.00138	0.0171	-0.473	-1.39	nucleolar and coiled-body phosphoprotein 1 [Source:MGI Symbol;Acc:MGI:1918019]
Zfand3	6.07	5.61	-3.38	0.00138	0.0171	-0.609	-1.53	zinc finger, AN1-type domain 3 [Source:MGI Symbol;Acc:MGI:1096572]
Fam183b	3.16	2.09	-3.38	0.00138	0.0171	-1.12	-2.18	family with sequence similarity 183, member B [Source:MGI Symbol;Acc:MGI:1922679]
Abcd2	4.83	5.3	3.38	0.00138	0.0171	0.485	1.4	ATP-binding cassette, sub-family D (ALD), member 2 [Source:MGI Symbol;Acc:MGI:1349467]
Gm5107	2.81	2.16	-3.38	0.00139	0.0171	-0.842	-1.79	predicted gene 5107 [Source:MGI Symbol;Acc:MGI:3643506]
Arid2	6.02	6.38	3.38	0.00139	0.0171	0.587	1.5	AT rich interactive domain 2 (ARID, RFX-like) [Source:MGI Symbol;Acc:MGI:1924294]
Brdt	3.76	4.17	3.38	0.00139	0.0171	0.608	1.52	bromodomain, testis-specific [Source:MGI Symbol;Acc:MGI:1891374]
Sema3e	3.2	4.5	3.38	0.00139	0.0171	1.33	2.52	sema domain, immunoglobulin domain (Ig), short basic domain, secreted, (semaphorin) 3E [Source:MGI Symbol;Acc:MGI:1340034]
Slc35a5	6.07	6.49	3.38	0.00139	0.0171	0.512	1.43	solute carrier family 35, member A5 [Source:MGI Symbol;Acc:MGI:1921352]
Mkrn3	0.292	-1.19	-3.38	0.00139	0.0171	-1.59	-3.01	makorin, ring finger protein, 3 [Source:MGI Symbol;Acc:MGI:2181178]
Rock1	5.3	5.73	3.38	0.00139	0.0171	0.613	1.53	Rho-associated coiled-coil containing protein kinase 1 [Source:MGI Symbol;Acc:MGI:107927]
Neto2	5.32	6.05	3.38	0.0014	0.0172	0.76	1.69	neuropilin (NRP) and tolloid (TLL)-like 2 [Source:MGI Symbol;Acc:MGI:1921763]
Taok2	7.1	6.76	-3.38	0.0014	0.0172	-0.433	-1.35	TAO kinase 2 [Source:MGI Symbol;Acc:MGI:1915919]
Zfp563	2.68	3.33	3.38	0.0014	0.0172	0.724	1.65	zinc finger protein 563 [Source:MGI Symbol;Acc:MGI:2677168]
BC037034	6.02	5.57	-3.38	0.00141	0.0173	-0.543	-1.46	cDNA sequence BC037034 [Source:MGI Symbol;Acc:MGI:2385896]
Rcan1	5.66	5.24	-3.38	0.00141	0.0173	-0.444	-1.36	regulator of calcineurin 1 [Source:MGI Symbol;Acc:MGI:1890564]
Lrfn3	4.65	4.08	-3.38	0.00141	0.0173	-0.632	-1.55	leucine rich repeat and fibronectin type III domain containing 3 [Source:MGI Symbol;Acc:MGI:2442512]
Mrps35	3.61	3.05	-3.38	0.00142	0.0173	-0.652	-1.57	mitochondrial ribosomal protein S35 [Source:MGI Symbol;Acc:MGI:2385255]
Dusp3	6.45	6.96	3.37	0.00142	0.0174	0.491	1.41	dual specificity phosphatase 3 (vaccinia virus phosphatase VH1-related) [Source:MGI Symbol;Acc:MGI:1919599]
Secisbp2l	7.03	7.5	3.38	0.00142	0.0173	0.513	1.43	SECIS binding protein 2-like [Source:MGI Symbol;Acc:MGI:1917604]
Anks1	6.04	5.71	-3.38	0.00142	0.0173	-0.407	-1.33	ankyrin repeat and SAM domain containing 1 [Source:MGI Symbol;Acc:MGI:2446180]
Eps15	7.39	7.85	3.37	0.00142	0.0174	0.455	1.37	epidermal growth factor receptor pathway substrate 15 [Source:MGI Symbol;Acc:MGI:104583]
Tnr	7.12	7.77	3.37	0.00143	0.0174	0.634	1.55	tenascin R [Source:MGI Symbol;Acc:MGI:99516]
Unc119b	5.23	4.97	-3.37	0.00143	0.0174	-0.382	-1.3	unc-119 homolog B (C. elegans) [Source:MGI Symbol;Acc:MGI:2147162]
Nrip1	4.44	5.07	3.37	0.00143	0.0174	0.732	1.66	nuclear receptor interacting protein 1 [Source:MGI Symbol;Acc:MGI:1315213]
Asic2	6.35	5.95	-3.37	0.00143	0.0174	-0.469	-1.38	acid-sensing (proton-gated) ion channel 2 [Source:MGI Symbol;Acc:MGI:1100867]
Arhgef1	6.83	6.55	-3.37	0.00143	0.0174	-0.456	-1.37	Rho guanine nucleotide exchange factor (GEF) 1 [Source:MGI Symbol;Acc:MGI:1353510]
Btf3l4	5.02	5.58	3.37	0.00143	0.0174	0.827	1.77	basic transcription factor 3-like 4 [Source:MGI Symbol;Acc:MGI:1915312]
BC027231	2.45	3.16	3.37	0.00143	0.0174	0.711	1.64	cDNA sequence BC027231 [Source:MGI Symbol;Acc:MGI:2384836]
Trim41	5.24	4.76	-3.37	0.00143	0.0174	-0.629	-1.55	tripartite motif-containing 41 [Source:MGI Symbol;Acc:MGI:2384814]
Klhl26	5.98	5.66	-3.37	0.00143	0.0174	-0.463	-1.38	kelch-like 26 [Source:MGI Symbol;Acc:MGI:2443079]
Gm42672	-2.55	-0.125	3.37	0.00144	0.0174	2.59	6.03	predicted gene 42672 [Source:MGI Symbol;Acc:MGI:5662809]
Tnk2	8.36	7.91	-3.37	0.00144	0.0174	-0.513	-1.43	tyrosine kinase, non-receptor, 2 [Source:MGI Symbol;Acc:MGI:1858308]
Bod1l	6.46	6.87	3.37	0.00144	0.0174	0.519	1.43	biorientation of chromosomes in cell division 1-like [Source:MGI Symbol;Acc:MGI:2444804]
Gga2	5.69	5.39	-3.37	0.00144	0.0174	-0.402	-1.32	golgi associated, gamma adaptin ear containing, ARF binding protein 2 [Source:MGI Symbol;Acc:MGI:1921355]
Col4a2	6.38	6.03	-3.37	0.00144	0.0174	-0.649	-1.57	collagen, type IV, alpha 2 [Source:MGI Symbol;Acc:MGI:88455]
Son	9	9.4	3.37	0.00145	0.0175	0.538	1.45	Son DNA binding protein [Source:MGI Symbol;Acc:MGI:98353]
Ascc3	4.65	5.02	3.37	0.00145	0.0175	0.579	1.49	activating signal cointegrator 1 complex subunit 3 [Source:MGI Symbol;Acc:MGI:1925237]
C130023A14Rik	1.18	2.21	3.37	0.00145	0.0175	1.29	2.44	RIKEN cDNA C130023A14 gene [Source:MGI Symbol;Acc:MGI:2442654]
Zfp60	5.91	6.24	3.37	0.00145	0.0174	0.486	1.4	zinc finger protein 60 [Source:MGI Symbol;Acc:MGI:99207]
Spata4	-0.0488	0.651	3.37	0.00145	0.0175	1.76	3.39	spermatogenesis associated 4 [Source:MGI Symbol;Acc:MGI:1916531]
Rpl4	8.55	7.88	-3.37	0.00145	0.0175	-0.671	-1.59	ribosomal protein L4 [Source:MGI Symbol;Acc:MGI:1915141]
Brwd3	2.96	3.88	3.37	0.00145	0.0175	1.13	2.19	bromodomain and WD repeat domain containing 3 [Source:MGI Symbol;Acc:MGI:3029414]
Plod3	5.42	5.1	-3.37	0.00145	0.0174	-0.478	-1.39	procollagen-lysine, 2-oxoglutarate 5-dioxygenase 3 [Source:MGI Symbol;Acc:MGI:1347008]
Mnt	5.31	4.94	-3.37	0.00145	0.0175	-0.515	-1.43	max binding protein [Source:MGI Symbol;Acc:MGI:109150]
Herc2	8.35	8.86	3.37	0.00146	0.0175	0.423	1.34	hect (homologous to the E6-AP (UBE3A) carboxyl terminus) domain and RCC1 (CHC1)-like domain (RLD) 2 [Source:MGI Symbol;Acc:MGI:103234]
Kxd1	4.77	4.35	-3.36	0.00146	0.0175	-0.533	-1.45	KxDL motif containing 1 [Source:MGI Symbol;Acc:MGI:1922870]
Gm22486	0.0554	0.97	3.37	0.00146	0.0175	1.73	3.32	predicted gene, 22486 [Source:MGI Symbol;Acc:MGI:5452263]
Usp25	4.7	5.16	3.37	0.00146	0.0175	0.477	1.39	ubiquitin specific peptidase 25 [Source:MGI Symbol;Acc:MGI:1353655]
Zim1	3.96	5.07	3.36	0.00147	0.0176	0.934	1.91	zinc finger, imprinted 1 [Source:MGI Symbol;Acc:MGI:1341879]
Smg1	6.69	7.49	3.36	0.00147	0.0176	0.753	1.69	SMG1 homolog, phosphatidylinositol 3-kinase-related kinase (C. elegans) [Source:MGI Symbol;Acc:MGI:1919742]
Tle2	5.42	4.97	-3.36	0.00147	0.0176	-0.769	-1.7	transducin-like enhancer of split 2, homolog of Drosophila E(spl) [Source:MGI Symbol;Acc:MGI:104635]
Tbc1d8b	2.52	3.31	3.36	0.00147	0.0176	0.938	1.92	TBC1 domain family, member 8B [Source:MGI Symbol;Acc:MGI:1918101]
Smyd1	2.16	3.19	3.36	0.00148	0.0177	0.99	1.99	SET and MYND domain containing 1 [Source:MGI Symbol;Acc:MGI:104790]
Trappc8	5.66	6.08	3.36	0.00148	0.0177	0.388	1.31	trafficking protein particle complex 8 [Source:MGI Symbol;Acc:MGI:2443008]
Mrpl37	5.77	5.4	-3.36	0.00148	0.0177	-0.409	-1.33	mitochondrial ribosomal protein L37 [Source:MGI Symbol;Acc:MGI:1926268]
D430013B06Rik	1.2	1.95	3.36	0.00148	0.0177	1.16	2.24	RIKEN cDNA D430013B06 gene [Source:MGI Symbol;Acc:MGI:3026994]
Prrg1	2.62	3.51	3.36	0.00149	0.0177	0.977	1.97	proline rich Gla (G-carboxyglutamic acid) 1 [Source:MGI Symbol;Acc:MGI:1917364]
Ndor1	5.13	4.93	-3.36	0.00149	0.0177	-0.464	-1.38	NADPH dependent diflavin oxidoreductase 1 [Source:MGI Symbol;Acc:MGI:1926047]
1110038F14Rik	2.94	2.14	-3.36	0.00149	0.0177	-0.871	-1.83	RIKEN cDNA 1110038F14 gene [Source:MGI Symbol;Acc:MGI:2152337]
Sppl2a	5.75	6.14	3.36	0.00149	0.0177	0.468	1.38	signal peptide peptidase like 2A [Source:MGI Symbol;Acc:MGI:1913802]
Gm37011	-1.13	0.251	3.36	0.0015	0.0177	2.46	5.51	predicted gene, 37011 [Source:MGI Symbol;Acc:MGI:5610239]
Dzip3	7.15	7.81	3.36	0.0015	0.0177	0.708	1.63	DAZ interacting protein 3, zinc finger [Source:MGI Symbol;Acc:MGI:1917433]
Adam15	6.34	5.82	-3.36	0.0015	0.0177	-0.672	-1.59	a disintegrin and metallopeptidase domain 15 (metargidin) [Source:MGI Symbol;Acc:MGI:1333882]
Abcb8	5.32	4.89	-3.36	0.0015	0.0177	-0.588	-1.5	ATP-binding cassette, sub-family B (MDR/TAP), member 8 [Source:MGI Symbol;Acc:MGI:1351667]
Zfp408	3.56	3.03	-3.36	0.0015	0.0178	-0.594	-1.51	zinc finger protein 408 [Source:MGI Symbol;Acc:MGI:2685857]
Prpf39	5.91	6.46	3.36	0.0015	0.0177	0.516	1.43	PRP39 pre-mRNA processing factor 39 homolog (yeast) [Source:MGI Symbol;Acc:MGI:104602]
Ptprz1	7.79	8.34	3.35	0.00151	0.0178	0.579	1.49	protein tyrosine phosphatase, receptor type Z, polypeptide 1 [Source:MGI Symbol;Acc:MGI:97816]
Mgat1	5.88	5.55	-3.35	0.00151	0.0178	-0.425	-1.34	mannoside acetylglucosaminyltransferase 1 [Source:MGI Symbol;Acc:MGI:96973]
Gspt1	6.07	6.52	3.35	0.00151	0.0178	0.485	1.4	G1 to S phase transition 1 [Source:MGI Symbol;Acc:MGI:1316728]
Eif2b1	4.22	3.87	-3.35	0.00151	0.0178	-0.539	-1.45	eukaryotic translation initiation factor 2B, subunit 1 (alpha) [Source:MGI Symbol;Acc:MGI:2384802]
Gm37127	-1.23	1.13	3.35	0.00151	0.0178	2.12	4.34	predicted gene, 37127 [Source:MGI Symbol;Acc:MGI:5610355]
Gpr19	3.99	3.54	-3.36	0.00151	0.0178	-0.514	-1.43	G protein-coupled receptor 19 [Source:MGI Symbol;Acc:MGI:892973]
Zfp111	3.29	3.76	3.35	0.00151	0.0178	0.675	1.6	zinc finger protein 111 [Source:MGI Symbol;Acc:MGI:1929114]
Sec61a1	6.2	5.78	-3.35	0.00151	0.0178	-0.381	-1.3	Sec61 alpha 1 subunit (S. cerevisiae) [Source:MGI Symbol;Acc:MGI:1858417]
Brwd1	6.91	7.27	3.35	0.00152	0.0178	0.397	1.32	bromodomain and WD repeat domain containing 1 [Source:MGI Symbol;Acc:MGI:1890651]
Hmcn1	2.04	2.64	3.35	0.00152	0.0178	0.867	1.82	hemicentin 1 [Source:MGI Symbol;Acc:MGI:2685047]
Dnajc3	6.27	6.61	3.35	0.00152	0.0178	0.397	1.32	DnaJ (Hsp40) homolog, subfamily C, member 3 [Source:MGI Symbol;Acc:MGI:107373]
Trpc5	3.01	4.37	3.35	0.00153	0.0179	1.43	2.69	transient receptor potential cation channel, subfamily C, member 5 [Source:MGI Symbol;Acc:MGI:109524]
Btbd8	0.191	1.79	3.35	0.00153	0.0179	1.39	2.63	BTB (POZ) domain containing 8 [Source:MGI Symbol;Acc:MGI:3646208]
Ano4	4.19	4.61	3.35	0.00153	0.0179	0.554	1.47	anoctamin 4 [Source:MGI Symbol;Acc:MGI:2443344]
Zfp367	4.27	4.79	3.35	0.00153	0.0179	0.584	1.5	zinc finger protein 367 [Source:MGI Symbol;Acc:MGI:2442266]
Gm12409	-1.85	-0.349	3.35	0.00153	0.0179	1.86	3.64	predicted gene 12409 [Source:MGI Symbol;Acc:MGI:3649923]
Pcdh15	4.93	5.49	3.35	0.00154	0.018	0.6	1.52	protocadherin 15 [Source:MGI Symbol;Acc:MGI:1891428]
Pcdh19	6.63	7.22	3.35	0.00154	0.018	0.66	1.58	protocadherin 19 [Source:MGI Symbol;Acc:MGI:2685563]
Snord37	1.34	0.327	-3.35	0.00154	0.018	-1.24	-2.37	small nucleolar RNA, C/D box 37 [Source:MGI Symbol;Acc:MGI:3819530]
Ankrd17	7.66	7.96	3.34	0.00155	0.0181	0.396	1.32	ankyrin repeat domain 17 [Source:MGI Symbol;Acc:MGI:1932101]
Dpy19l4	6.21	6.89	3.35	0.00155	0.018	0.754	1.69	dpy-19-like 4 (C. elegans) [Source:MGI Symbol;Acc:MGI:2685869]
Ccdc12	3.34	2.49	-3.35	0.00155	0.0181	-1.03	-2.05	coiled-coil domain containing 12 [Source:MGI Symbol;Acc:MGI:1919904]
1700021K19Rik	7.07	6.8	-3.34	0.00156	0.0181	-0.309	-1.24	RIKEN cDNA 1700021K19 gene [Source:MGI Symbol;Acc:MGI:1915160]
Zmynd10	1.95	1.31	-3.34	0.00156	0.0181	-0.991	-1.99	zinc finger, MYND domain containing 10 [Source:MGI Symbol;Acc:MGI:2387863]
Coro1c	6.21	5.86	-3.34	0.00156	0.0182	-0.549	-1.46	coronin, actin binding protein 1C [Source:MGI Symbol;Acc:MGI:1345964]
6330403K07Rik	9.33	8.68	-3.34	0.00156	0.0181	-0.67	-1.59	RIKEN cDNA 6330403K07 gene [Source:MGI Symbol;Acc:MGI:1918001]
Chchd5	2.91	2.15	-3.34	0.00157	0.0182	-0.842	-1.79	coiled-coil-helix-coiled-coil-helix domain containing 5 [Source:MGI Symbol;Acc:MGI:1913420]
Sh3glb2	7.34	6.95	-3.34	0.00157	0.0182	-0.449	-1.37	SH3-domain GRB2-like endophilin B2 [Source:MGI Symbol;Acc:MGI:2385131]
Nfatc3	4.12	4.62	3.34	0.00157	0.0182	0.506	1.42	nuclear factor of activated T cells, cytoplasmic, calcineurin dependent 3 [Source:MGI Symbol;Acc:MGI:103296]
Txndc5	6.62	6.3	-3.34	0.00157	0.0182	-0.389	-1.31	thioredoxin domain containing 5 [Source:MGI Symbol;Acc:MGI:2145316]
Plekhh1	5.29	6.06	3.34	0.00158	0.0183	0.578	1.49	pleckstrin homology domain containing, family H (with MyTH4 domain) member 1 [Source:MGI Symbol;Acc:MGI:2144989]
Atp11b	6.79	7.33	3.34	0.00158	0.0183	0.518	1.43	ATPase, class VI, type 11B [Source:MGI Symbol;Acc:MGI:1923545]
Xylb	3.4	2.9	-3.34	0.00158	0.0183	-0.611	-1.53	xylulokinase homolog (H. influenzae) [Source:MGI Symbol;Acc:MGI:2142985]
Cdh13	7.19	6.77	-3.34	0.00158	0.0183	-0.403	-1.32	cadherin 13 [Source:MGI Symbol;Acc:MGI:99551]
Pias4	4.33	3.76	-3.34	0.00158	0.0183	-0.643	-1.56	protein inhibitor of activated STAT 4 [Source:MGI Symbol;Acc:MGI:2136940]
Gpalpp1	5.14	5.74	3.34	0.00158	0.0183	0.626	1.54	GPALPP motifs containing 1 [Source:MGI Symbol;Acc:MGI:1914717]
Inha	4.13	3.67	-3.34	0.00158	0.0183	-0.734	-1.66	inhibin alpha [Source:MGI Symbol;Acc:MGI:96569]
Uvssa	4.47	5.15	3.34	0.00159	0.0183	0.669	1.59	UV stimulated scaffold protein A [Source:MGI Symbol;Acc:MGI:1918351]
Diap2	4.23	4.89	3.34	0.00159	0.0183	0.75	1.68	diaphanous homolog 2 (Drosophila) [Source:MGI Symbol;Acc:MGI:1858500]
Dusp11	7.33	7.84	3.34	0.00159	0.0183	0.485	1.4	dual specificity phosphatase 11 (RNA/RNP complex 1-interacting) [Source:MGI Symbol;Acc:MGI:1919352]
Cdc34	3.38	2.77	-3.34	0.00159	0.0183	-0.835	-1.78	cell division cycle 34 [Source:MGI Symbol;Acc:MGI:102657]
Trp53inp1	4.75	5.33	3.34	0.00159	0.0183	0.67	1.59	transformation related protein 53 inducible nuclear protein 1 [Source:MGI Symbol;Acc:MGI:1926609]
Gm42639	2.56	3.17	3.34	0.00159	0.0183	1	2	predicted gene 42639 [Source:MGI Symbol;Acc:MGI:5662776]
Chd3	8.79	8.49	-3.34	0.00159	0.0183	-0.395	-1.32	chromodomain helicase DNA binding protein 3 [Source:MGI Symbol;Acc:MGI:1344395]
Tpra1	5.41	5.02	-3.34	0.00159	0.0183	-0.491	-1.41	transmembrane protein, adipocyte asscociated 1 [Source:MGI Symbol;Acc:MGI:1345190]
Ercc1	4.92	4.3	-3.34	0.00159	0.0183	-0.499	-1.41	excision repair cross-complementing rodent repair deficiency, complementation group 1 [Source:MGI Symbol;Acc:MGI:95412]
Hsp90ab1	9.96	9.48	-3.33	0.0016	0.0184	-0.631	-1.55	heat shock protein 90 alpha (cytosolic), class B member 1 [Source:MGI Symbol;Acc:MGI:96247]
Hint3	2.34	3.41	3.33	0.0016	0.0184	1.04	2.06	histidine triad nucleotide binding protein 3 [Source:MGI Symbol;Acc:MGI:1914097]
Rrp36	4.19	3.72	-3.33	0.0016	0.0184	-0.635	-1.55	ribosomal RNA processing 36 homolog (S. cerevisiae) [Source:MGI Symbol;Acc:MGI:2385053]
Zfp493	0.522	1.52	3.33	0.0016	0.0184	1.2	2.3	zinc finger protein 493 [Source:MGI Symbol;Acc:MGI:1920208]
Ssh2	6.05	6.4	3.33	0.00161	0.0184	0.42	1.34	slingshot homolog 2 (Drosophila) [Source:MGI Symbol;Acc:MGI:2679255]
Shroom2	6.37	6.82	3.33	0.00161	0.0184	0.494	1.41	shroom family member 2 [Source:MGI Symbol;Acc:MGI:107194]
Oxt	6.55	1.94	-3.33	0.00161	0.0184	-3.67	-12.8	oxytocin [Source:MGI Symbol;Acc:MGI:97453]
Pou3f2	5.04	5.55	3.33	0.00161	0.0184	0.667	1.59	POU domain, class 3, transcription factor 2 [Source:MGI Symbol;Acc:MGI:101895]
Ndufb2	6.27	6.63	3.33	0.00161	0.0184	0.65	1.57	NADH dehydrogenase (ubiquinone) 1 beta subcomplex, 2 [Source:MGI Symbol;Acc:MGI:1915448]
Pelo	3.49	2.93	-3.33	0.00162	0.0184	-0.82	-1.77	pelota homolog (Drosophila) [Source:MGI Symbol;Acc:MGI:2145154]
Hnrnpul1	6.74	6.5	-3.33	0.00162	0.0184	-0.294	-1.23	heterogeneous nuclear ribonucleoprotein U-like 1 [Source:MGI Symbol;Acc:MGI:2443517]
Exph5	-0.0461	1.26	3.33	0.00163	0.0186	1.79	3.46	exophilin 5 [Source:MGI Symbol;Acc:MGI:2443248]
Tgfbr1	5.17	5.7	3.33	0.00163	0.0185	0.533	1.45	transforming growth factor, beta receptor I [Source:MGI Symbol;Acc:MGI:98728]
Tor2a	3.46	2.95	-3.33	0.00163	0.0185	-0.664	-1.58	torsin family 2, member A [Source:MGI Symbol;Acc:MGI:1353596]
Asphd1	5.16	4.45	-3.33	0.00163	0.0185	-0.598	-1.51	aspartate beta-hydroxylase domain containing 1 [Source:MGI Symbol;Acc:MGI:2685014]
Mto1	4.47	4.82	3.33	0.00163	0.0185	0.416	1.33	mitochondrial translation optimization 1 homolog (S. cerevisiae) [Source:MGI Symbol;Acc:MGI:1915541]
Smarce1	4.98	4.61	-3.33	0.00163	0.0185	-0.47	-1.39	SWI/SNF related, matrix associated, actin dependent regulator of chromatin, subfamily e, member 1 [Source:MGI Symbol;Acc:MGI:1927347]
1810026B05Rik	1.74	2.74	3.33	0.00164	0.0186	1.02	2.02	RIKEN cDNA 1810026B05 gene [Source:MGI Symbol;Acc:MGI:1916420]
Pycrl	4.12	3.52	-3.33	0.00164	0.0186	-0.765	-1.7	pyrroline-5-carboxylate reductase-like [Source:MGI Symbol;Acc:MGI:1913444]
Ttc27	3.96	3.57	-3.33	0.00164	0.0186	-0.458	-1.37	tetratricopeptide repeat domain 27 [Source:MGI Symbol;Acc:MGI:1921446]
Atxn1	5.81	6.37	3.33	0.00164	0.0186	0.48	1.39	ataxin 1 [Source:MGI Symbol;Acc:MGI:104783]
Gm24455	-1.12	0.433	3.33	0.00164	0.0186	2.3	4.91	predicted gene, 24455 [Source:MGI Symbol;Acc:MGI:5454232]
Zfp871	1.5	4.34	3.32	0.00165	0.0186	2.74	6.66	zinc finger protein 871 [Source:MGI Symbol;Acc:MGI:1921793]
Zfp428	3.61	2.76	-3.33	0.00165	0.0186	-1.07	-2.09	zinc finger protein 428 [Source:MGI Symbol;Acc:MGI:1916463]
Fcho1	5.83	5.48	-3.32	0.00165	0.0186	-0.622	-1.54	FCH domain only 1 [Source:MGI Symbol;Acc:MGI:1921265]
Tmed9	5.77	5.26	-3.32	0.00165	0.0186	-0.614	-1.53	transmembrane emp24 protein transport domain containing 9 [Source:MGI Symbol;Acc:MGI:1914761]
Lfng	5.55	5.13	-3.32	0.00165	0.0186	-0.521	-1.43	LFNG O-fucosylpeptide 3-beta-N-acetylglucosaminyltransferase [Source:MGI Symbol;Acc:MGI:1095413]
Hnrnpu	7.59	8.09	3.32	0.00165	0.0186	0.663	1.58	heterogeneous nuclear ribonucleoprotein U [Source:MGI Symbol;Acc:MGI:1858195]
Akt3	6.4	6.92	3.32	0.00165	0.0186	0.473	1.39	thymoma viral proto-oncogene 3 [Source:MGI Symbol;Acc:MGI:1345147]
Crtc1	7.16	6.79	-3.32	0.00165	0.0186	-0.498	-1.41	CREB regulated transcription coactivator 1 [Source:MGI Symbol;Acc:MGI:2142523]
Plin2	2.95	2.47	-3.32	0.00165	0.0186	-0.702	-1.63	perilipin 2 [Source:MGI Symbol;Acc:MGI:87920]
Snhg20	4.11	3.48	-3.32	0.00166	0.0186	-0.743	-1.67	small nucleolar RNA host gene 20 [Source:MGI Symbol;Acc:MGI:1924222]
Ctsb	9.09	8.77	-3.32	0.00166	0.0187	-0.402	-1.32	cathepsin B [Source:MGI Symbol;Acc:MGI:88561]
Thra	9.35	8.81	-3.32	0.00166	0.0186	-0.722	-1.65	thyroid hormone receptor alpha [Source:MGI Symbol;Acc:MGI:98742]
Pcdhb19	2.08	3	3.32	0.00166	0.0186	1.11	2.15	protocadherin beta 19 [Source:MGI Symbol;Acc:MGI:2136757]
Taf1c	3.65	3.11	-3.32	0.00167	0.0187	-0.612	-1.53	TATA box binding protein (Tbp)-associated factor, RNA polymerase I, C [Source:MGI Symbol;Acc:MGI:109576]
Rel	1.71	2.7	3.32	0.00167	0.0187	1.06	2.08	reticuloendotheliosis oncogene [Source:MGI Symbol;Acc:MGI:97897]
Trpv2	4.99	4.52	-3.32	0.00167	0.0187	-0.596	-1.51	transient receptor potential cation channel, subfamily V, member 2 [Source:MGI Symbol;Acc:MGI:1341836]
Uqcc3	2.91	2.05	-3.32	0.00167	0.0187	-1.21	-2.31	ubiquinol-cytochrome c reductase complex assembly factor 3 [Source:MGI Symbol;Acc:MGI:2147553]
En2	0.319	2.11	3.32	0.00168	0.0187	1.61	3.06	engrailed 2 [Source:MGI Symbol;Acc:MGI:95390]
Epg5	6.13	6.59	3.32	0.00168	0.0188	0.397	1.32	ectopic P-granules autophagy protein 5 homolog (C. elegans) [Source:MGI Symbol;Acc:MGI:1918673]
Calr	8.4	7.95	-3.32	0.00168	0.0187	-0.464	-1.38	calreticulin [Source:MGI Symbol;Acc:MGI:88252]
Caskin2	5.13	4.72	-3.32	0.00168	0.0188	-0.459	-1.37	CASK-interacting protein 2 [Source:MGI Symbol;Acc:MGI:2157062]
Mapk8ip3	8.83	8.58	-3.32	0.00168	0.0188	-0.393	-1.31	mitogen-activated protein kinase 8 interacting protein 3 [Source:MGI Symbol;Acc:MGI:1353598]
Adat3	1.77	0.957	-3.32	0.00169	0.0188	-1.06	-2.08	adenosine deaminase, tRNA-specific 3 [Source:MGI Symbol;Acc:MGI:1924344]
Chpf	6.43	5.96	-3.32	0.00169	0.0188	-0.527	-1.44	chondroitin polymerizing factor [Source:MGI Symbol;Acc:MGI:106576]
Rnf138rt1	2.68	2	-3.32	0.00169	0.0188	-0.761	-1.69	ring finger protein 138, retrogene 1 [Source:MGI Symbol;Acc:MGI:1921514]
Adam22	8.09	8.63	3.32	0.00169	0.0188	0.462	1.38	a disintegrin and metallopeptidase domain 22 [Source:MGI Symbol;Acc:MGI:1340046]
Glrb	7.56	8.18	3.32	0.00169	0.0188	0.507	1.42	glycine receptor, beta subunit [Source:MGI Symbol;Acc:MGI:95751]
Celf3	7	6.53	-3.32	0.00169	0.0188	-0.657	-1.58	CUGBP, Elav-like family member 3 [Source:MGI Symbol;Acc:MGI:1926034]
Gtf3c3	5.29	5.77	3.32	0.00169	0.0188	0.522	1.44	general transcription factor IIIC, polypeptide 3 [Source:MGI Symbol;Acc:MGI:2138383]
Gm21984	3.65	4.58	3.31	0.0017	0.0188	0.978	1.97	predicted gene 21984 [Source:MGI Symbol;Acc:MGI:5439453]
Galnt7	4.27	4.85	3.31	0.0017	0.0188	0.489	1.4	UDP-N-acetyl-alpha-D-galactosamine: polypeptide N-acetylgalactosaminyltransferase 7 [Source:MGI Symbol;Acc:MGI:1349449]
Fxyd7	4.63	3.9	-3.31	0.0017	0.0189	-0.854	-1.81	FXYD domain-containing ion transport regulator 7 [Source:MGI Symbol;Acc:MGI:1889006]
Pqlc1	4.48	4.02	-3.31	0.00171	0.0189	-0.571	-1.49	PQ loop repeat containing 1 [Source:MGI Symbol;Acc:MGI:1914193]
Tm2d3	4.83	4.21	-3.31	0.00171	0.0189	-0.731	-1.66	TM2 domain containing 3 [Source:MGI Symbol;Acc:MGI:1915884]
Wdr4	4.49	4.08	-3.31	0.00171	0.0189	-0.647	-1.57	WD repeat domain 4 [Source:MGI Symbol;Acc:MGI:1889002]
Rhoq	5.77	6.16	3.31	0.00172	0.0189	0.399	1.32	ras homolog gene family, member Q [Source:MGI Symbol;Acc:MGI:1931553]
Cpeb4	6.62	7.23	3.31	0.00172	0.0189	0.624	1.54	cytoplasmic polyadenylation element binding protein 4 [Source:MGI Symbol;Acc:MGI:1914829]
Fam65a	6.2	5.82	-3.31	0.00172	0.0189	-0.527	-1.44	family with sequence similarity 65, member A [Source:MGI Symbol;Acc:MGI:1922937]
Tmem106b	7.55	8.12	3.31	0.00172	0.0189	0.605	1.52	transmembrane protein 106B [Source:MGI Symbol;Acc:MGI:1919150]
Pusl1	3.91	3.51	-3.31	0.00172	0.0189	-0.708	-1.63	pseudouridylate synthase-like 1 [Source:MGI Symbol;Acc:MGI:3047787]
Hexdc	5.6	5.21	-3.31	0.00172	0.0189	-0.431	-1.35	hexosaminidase (glycosyl hydrolase family 20, catalytic domain) containing [Source:MGI Symbol;Acc:MGI:3605542]
Alms1	3.2	4.03	3.31	0.00172	0.0189	0.884	1.85	Alstrom syndrome 1 [Source:MGI Symbol;Acc:MGI:1934606]
Kifc2	7.86	7.44	-3.31	0.00172	0.0189	-0.577	-1.49	kinesin family member C2 [Source:MGI Symbol;Acc:MGI:109187]
Ado	5.31	5.71	3.31	0.00172	0.0189	0.463	1.38	2-aminoethanethiol (cysteamine) dioxygenase [Source:MGI Symbol;Acc:MGI:2685083]
Thoc2	5.85	6.28	3.31	0.00172	0.0189	0.586	1.5	THO complex 2 [Source:MGI Symbol;Acc:MGI:2442413]
Usp27x	4.67	4.11	-3.31	0.00172	0.0189	-0.521	-1.43	ubiquitin specific peptidase 27, X chromosome [Source:MGI Symbol;Acc:MGI:1859645]
Rlim	6.7	7.19	3.31	0.00173	0.019	0.612	1.53	ring finger protein, LIM domain interacting [Source:MGI Symbol;Acc:MGI:1342291]
1500009C09Rik	7.18	6.71	-3.31	0.00173	0.019	-0.563	-1.48	RIKEN cDNA 1500009C09 gene [Source:MGI Symbol;Acc:MGI:1923755]
Avl9	6.04	6.57	3.31	0.00173	0.019	0.576	1.49	AVL9 homolog (S. cerevisiase) [Source:MGI Symbol;Acc:MGI:1926187]
Sgsm2	7.03	6.69	-3.31	0.00173	0.019	-0.533	-1.45	small G protein signaling modulator 2 [Source:MGI Symbol;Acc:MGI:2144695]
Eif2ak1	5.89	5.6	-3.31	0.00173	0.019	-0.389	-1.31	eukaryotic translation initiation factor 2 alpha kinase 1 [Source:MGI Symbol;Acc:MGI:1353448]
Lmna	4.77	4.07	-3.31	0.00173	0.019	-0.859	-1.81	lamin A [Source:MGI Symbol;Acc:MGI:96794]
Ahcyl1	8.6	8.96	3.31	0.00173	0.019	0.34	1.27	S-adenosylhomocysteine hydrolase-like 1 [Source:MGI Symbol;Acc:MGI:2385184]
Klf16	3.91	3.27	-3.31	0.00174	0.019	-0.707	-1.63	Kruppel-like factor 16 [Source:MGI Symbol;Acc:MGI:2153049]
Slc8a2	6.23	5.7	-3.31	0.00174	0.0191	-0.691	-1.61	solute carrier family 8 (sodium/calcium exchanger), member 2 [Source:MGI Symbol;Acc:MGI:107996]
Tdp2	4.1	4.36	3.3	0.00175	0.0191	0.569	1.48	tyrosyl-DNA phosphodiesterase 2 [Source:MGI Symbol;Acc:MGI:1860486]
Osbpl1a	6.63	7.17	3.3	0.00175	0.0191	0.479	1.39	oxysterol binding protein-like 1A [Source:MGI Symbol;Acc:MGI:1927551]
Pcdh8	5.21	4.61	-3.3	0.00175	0.0191	-0.627	-1.54	protocadherin 8 [Source:MGI Symbol;Acc:MGI:1306800]
2610037D02Rik	-0.114	1.67	3.3	0.00176	0.0191	1.79	3.45	RIKEN cDNA 2610037D02 gene [Source:MGI Symbol;Acc:MGI:1917290]
Zfp318	5.88	6.27	3.3	0.00176	0.0191	0.401	1.32	zinc finger protein 318 [Source:MGI Symbol;Acc:MGI:1889348]
Cct3	7.09	6.62	-3.3	0.00176	0.0191	-0.527	-1.44	chaperonin containing Tcp1, subunit 3 (gamma) [Source:MGI Symbol;Acc:MGI:104708]
Sh3bp1	6.91	6.45	-3.3	0.00176	0.0191	-0.658	-1.58	SH3-domain binding protein 1 [Source:MGI Symbol;Acc:MGI:104603]
Nfkbil1	2.69	1.89	-3.3	0.00176	0.0191	-1.07	-2.1	nuclear factor of kappa light polypeptide gene enhancer in B cells inhibitor like 1 [Source:MGI Symbol;Acc:MGI:1340031]
Map1s	6.32	5.83	-3.3	0.00176	0.0191	-0.575	-1.49	microtubule-associated protein 1S [Source:MGI Symbol;Acc:MGI:2443304]
Traf6	4.31	4.67	3.3	0.00176	0.0191	0.446	1.36	TNF receptor-associated factor 6 [Source:MGI Symbol;Acc:MGI:108072]
Vkorc1l1	6.24	6.66	3.3	0.00176	0.0191	0.501	1.42	vitamin K epoxide reductase complex, subunit 1-like 1 [Source:MGI Symbol;Acc:MGI:1916818]
2018-09-02	6.14	6.47	3.3	0.00176	0.0191	0.397	1.32	septin 2 [Source:MGI Symbol;Acc:MGI:97298]
Fam129b	4.45	3.85	-3.3	0.00178	0.0193	-0.738	-1.67	family with sequence similarity 129, member B [Source:MGI Symbol;Acc:MGI:2442910]
Lrrc8b	5.54	6.2	3.3	0.00178	0.0193	0.682	1.6	leucine rich repeat containing 8 family, member B [Source:MGI Symbol;Acc:MGI:2141353]
Cnot6	6.3	6.82	3.3	0.00178	0.0193	0.596	1.51	CCR4-NOT transcription complex, subunit 6 [Source:MGI Symbol;Acc:MGI:2144529]
Smarcd3	4.76	4.35	-3.3	0.00178	0.0193	-0.685	-1.61	SWI/SNF related, matrix associated, actin dependent regulator of chromatin, subfamily d, member 3 [Source:MGI Symbol;Acc:MGI:1914243]
Tnnc1	2.65	1.37	-3.3	0.00178	0.0193	-1.12	-2.18	troponin C, cardiac/slow skeletal [Source:MGI Symbol;Acc:MGI:98779]
Dgke	7.03	7.38	3.3	0.00179	0.0193	0.358	1.28	diacylglycerol kinase, epsilon [Source:MGI Symbol;Acc:MGI:1889276]
Zfp651	5.44	4.98	-3.3	0.00179	0.0193	-0.545	-1.46	zinc finger protein 651 [Source:MGI Symbol;Acc:MGI:2670992]
Rapgef4	7.32	7.9	3.3	0.00179	0.0193	0.468	1.38	Rap guanine nucleotide exchange factor (GEF) 4 [Source:MGI Symbol;Acc:MGI:1917723]
Upk1a	-0.19	-1.43	-3.3	0.00179	0.0193	-1.61	-3.05	uroplakin 1A [Source:MGI Symbol;Acc:MGI:98911]
Evi5	6.3	6.78	3.3	0.00179	0.0193	0.55	1.46	ecotropic viral integration site 5 [Source:MGI Symbol;Acc:MGI:104736]
Alad	4.59	4.02	-3.3	0.00179	0.0193	-0.807	-1.75	aminolevulinate, delta-, dehydratase [Source:MGI Symbol;Acc:MGI:96853]
Spryd3	7.62	7.23	-3.3	0.00179	0.0193	-0.48	-1.39	SPRY domain containing 3 [Source:MGI Symbol;Acc:MGI:2446175]
B430203G13Rik	-2.7	-0.297	3.3	0.00179	0.0193	2.41	5.3	RIKEN cDNA B430203G13 gene [Source:MGI Symbol;Acc:MGI:3642832]
Adgrl1	8.31	7.95	-3.3	0.00179	0.0193	-0.44	-1.36	adhesion G protein-coupled receptor L1 [Source:MGI Symbol;Acc:MGI:1929461]
Cnot6l	5.71	6.25	3.29	0.0018	0.0194	0.633	1.55	CCR4-NOT transcription complex, subunit 6-like [Source:MGI Symbol;Acc:MGI:2443154]
Ppp1r3c	5.26	5.58	3.29	0.0018	0.0193	0.429	1.35	protein phosphatase 1, regulatory (inhibitor) subunit 3C [Source:MGI Symbol;Acc:MGI:1858229]
Fuca1	5.26	4.6	-3.29	0.00181	0.0195	-0.766	-1.7	fucosidase, alpha-L- 1, tissue [Source:MGI Symbol;Acc:MGI:95593]
Oxr1	7.36	7.86	3.29	0.00181	0.0194	0.497	1.41	oxidation resistance 1 [Source:MGI Symbol;Acc:MGI:2179326]
Tmem88b	6.03	6.66	3.29	0.00182	0.0195	0.59	1.51	transmembrane protein 88B [Source:MGI Symbol;Acc:MGI:2444329]
Snord49a	5.19	7.58	3.29	0.00182	0.0195	4.26	19.1	small nucleolar RNA, C/D box 49A [Source:MGI Symbol;Acc:MGI:3819538]
Dtx2	3.54	3.04	-3.29	0.00182	0.0195	-0.639	-1.56	deltex 2 homolog (Drosophila) [Source:MGI Symbol;Acc:MGI:1921448]
Tmtc1	6.53	6.94	3.29	0.00182	0.0195	0.474	1.39	transmembrane and tetratricopeptide repeat containing 1 [Source:MGI Symbol;Acc:MGI:3039590]
Elp3	6.78	6.43	-3.29	0.00182	0.0195	-0.366	-1.29	elongator acetyltransferase complex subunit 3 [Source:MGI Symbol;Acc:MGI:1921445]
Rrad	3.11	1.65	-3.29	0.00182	0.0195	-1.18	-2.27	Ras-related associated with diabetes [Source:MGI Symbol;Acc:MGI:1930943]
Khk	2.51	1.93	-3.29	0.00183	0.0195	-0.67	-1.59	ketohexokinase [Source:MGI Symbol;Acc:MGI:1096353]
2810004N23Rik	3.6	3.17	-3.29	0.00183	0.0195	-0.551	-1.47	RIKEN cDNA 2810004N23 gene [Source:MGI Symbol;Acc:MGI:1913773]
Rab43	4.28	3.85	-3.29	0.00183	0.0195	-0.479	-1.39	RAB43, member RAS oncogene family [Source:MGI Symbol;Acc:MGI:1917084]
Trim30d	0.662	1.69	3.29	0.00183	0.0195	1.29	2.45	tripartite motif-containing 30D [Source:MGI Symbol;Acc:MGI:3035181]
Orc3	5.39	5.79	3.29	0.00183	0.0195	0.432	1.35	origin recognition complex, subunit 3 [Source:MGI Symbol;Acc:MGI:1354944]
Phf1	6.64	6.08	-3.29	0.00183	0.0195	-0.578	-1.49	PHD finger protein 1 [Source:MGI Symbol;Acc:MGI:98647]
Grk6	6.27	5.94	-3.29	0.00183	0.0195	-0.391	-1.31	G protein-coupled receptor kinase 6 [Source:MGI Symbol;Acc:MGI:1347078]
NA	-1.92	0.41	3.29	0.00184	0.0195	2.23	4.7	NA
Pcdhb22	3.75	4.27	3.29	0.00184	0.0195	0.554	1.47	protocadherin beta 22 [Source:MGI Symbol;Acc:MGI:2136760]
Dip2b	6.9	7.38	3.29	0.00184	0.0195	0.429	1.35	DIP2 disco-interacting protein 2 homolog B (Drosophila) [Source:MGI Symbol;Acc:MGI:2145977]
Pum2	7.72	8.12	3.29	0.00184	0.0196	0.52	1.43	pumilio RNA-binding family member 2 [Source:MGI Symbol;Acc:MGI:1931751]
Ppp1r16a	6.46	6.04	-3.29	0.00184	0.0195	-0.577	-1.49	protein phosphatase 1, regulatory (inhibitor) subunit 16A [Source:MGI Symbol;Acc:MGI:1920312]
Larp6	5.32	4.81	-3.28	0.00185	0.0196	-0.593	-1.51	La ribonucleoprotein domain family, member 6 [Source:MGI Symbol;Acc:MGI:1914807]
Atp9a	8.92	8.52	-3.29	0.00185	0.0196	-0.517	-1.43	ATPase, class II, type 9A [Source:MGI Symbol;Acc:MGI:1330826]
Polrmt	4.09	3.53	-3.28	0.00186	0.0197	-0.733	-1.66	polymerase (RNA) mitochondrial (DNA directed) [Source:MGI Symbol;Acc:MGI:1915843]
5930409G06Rik	2.02	2.71	3.28	0.00186	0.0197	1.11	2.15	RIKEN cDNA 5930409G06 gene [Source:MGI Symbol;Acc:MGI:1924316]
Setd1a	4.87	4.68	-3.28	0.00186	0.0197	-0.443	-1.36	SET domain containing 1A [Source:MGI Symbol;Acc:MGI:2446244]
Mtss1l	8.33	8.06	-3.28	0.00187	0.0198	-0.352	-1.28	metastasis suppressor 1-like [Source:MGI Symbol;Acc:MGI:3039591]
Osbpl7	4.82	4.34	-3.28	0.00188	0.0198	-0.504	-1.42	oxysterol binding protein-like 7 [Source:MGI Symbol;Acc:MGI:1918490]
Ahnak	5.56	6.16	3.28	0.00188	0.0198	0.616	1.53	AHNAK nucleoprotein (desmoyokin) [Source:MGI Symbol;Acc:MGI:1316648]
Edem3	5.78	6.31	3.28	0.00189	0.02	0.568	1.48	ER degradation enhancer, mannosidase alpha-like 3 [Source:MGI Symbol;Acc:MGI:1914217]
Flywch1	8.14	7.58	-3.28	0.00189	0.02	-0.635	-1.55	FLYWCH-type zinc finger 1 [Source:MGI Symbol;Acc:MGI:2442638]
Polq	1.75	2.6	3.28	0.00189	0.02	1.15	2.22	polymerase (DNA directed), theta [Source:MGI Symbol;Acc:MGI:2155399]
Prmt7	5.61	5.25	-3.28	0.00189	0.0199	-0.482	-1.4	protein arginine N-methyltransferase 7 [Source:MGI Symbol;Acc:MGI:2384879]
Aifm3	7.01	6.65	-3.28	0.0019	0.02	-0.503	-1.42	apoptosis-inducing factor, mitochondrion-associated 3 [Source:MGI Symbol;Acc:MGI:1919418]
Ccdc23	3.76	4.2	3.28	0.0019	0.02	0.79	1.73	coiled-coil domain containing 23 [Source:MGI Symbol;Acc:MGI:1916466]
Usp21	5.39	5	-3.28	0.0019	0.02	-0.401	-1.32	ubiquitin specific peptidase 21 [Source:MGI Symbol;Acc:MGI:1353665]
Nsun6	2.75	3.24	3.28	0.0019	0.02	0.671	1.59	NOL1/NOP2/Sun domain family member 6 [Source:MGI Symbol;Acc:MGI:1921705]
Ccdc50	6.38	6.94	3.27	0.00191	0.02	0.518	1.43	coiled-coil domain containing 50 [Source:MGI Symbol;Acc:MGI:1914751]
Gtf2f1	5.22	4.62	-3.27	0.00191	0.02	-0.653	-1.57	general transcription factor IIF, polypeptide 1 [Source:MGI Symbol;Acc:MGI:1923848]
Tmie	5.48	4.74	-3.27	0.00191	0.0201	-0.789	-1.73	transmembrane inner ear [Source:MGI Symbol;Acc:MGI:2159400]
Ascc2	5.86	5.59	-3.27	0.00192	0.0201	-0.376	-1.3	activating signal cointegrator 1 complex subunit 2 [Source:MGI Symbol;Acc:MGI:1922702]
Elac2	5.28	4.98	-3.27	0.00192	0.0201	-0.381	-1.3	elaC homolog 2 (E. coli) [Source:MGI Symbol;Acc:MGI:1890496]
Naa50	6.78	7.21	3.27	0.00192	0.0201	0.526	1.44	N(alpha)-acetyltransferase 50, NatE catalytic subunit [Source:MGI Symbol;Acc:MGI:1919367]
Dtx1	6.95	6.53	-3.27	0.00192	0.0201	-0.415	-1.33	deltex 1 homolog (Drosophila) [Source:MGI Symbol;Acc:MGI:1352744]
Cherp	5.41	5.11	-3.27	0.00192	0.0201	-0.505	-1.42	calcium homeostasis endoplasmic reticulum protein [Source:MGI Symbol;Acc:MGI:106417]
Shisa8	-0.607	-2.3	-3.27	0.00193	0.0202	-2.47	-5.56	shisa family member 8 [Source:MGI Symbol;Acc:MGI:2146080]
Atp2c2	2.1	0.979	-3.27	0.00193	0.0202	-1.14	-2.2	ATPase, Ca++ transporting, type 2C, member 2 [Source:MGI Symbol;Acc:MGI:1916297]
Zfp182	3.47	4.16	3.27	0.00193	0.0202	0.686	1.61	zinc finger protein 182 [Source:MGI Symbol;Acc:MGI:2442220]
Ganab	7.32	7.09	-3.27	0.00193	0.0202	-0.351	-1.28	alpha glucosidase 2 alpha neutral subunit [Source:MGI Symbol;Acc:MGI:1097667]
Jmy	5.51	5.95	3.27	0.00193	0.0202	0.445	1.36	junction-mediating and regulatory protein [Source:MGI Symbol;Acc:MGI:1913096]
Zfp867	3.45	3.92	3.27	0.00193	0.0202	0.571	1.49	zinc finger protein 867 [Source:MGI Symbol;Acc:MGI:2681848]
Vps13c	5.05	6.25	3.27	0.00194	0.0202	0.922	1.9	vacuolar protein sorting 13C (yeast) [Source:MGI Symbol;Acc:MGI:2444207]
Aimp1	5.28	4.73	-3.27	0.00194	0.0202	-0.626	-1.54	aminoacyl tRNA synthetase complex-interacting multifunctional protein 1 [Source:MGI Symbol;Acc:MGI:102774]
BC002059	1.19	1.77	3.27	0.00194	0.0202	1.2	2.3	cDNA sequence BC002059 [Source:MGI Symbol;Acc:MGI:2384864]
Smndc1	4.86	5.29	3.27	0.00194	0.0202	0.528	1.44	survival motor neuron domain containing 1 [Source:MGI Symbol;Acc:MGI:1923729]
Orai2	5.21	4.77	-3.27	0.00194	0.0202	-0.495	-1.41	ORAI calcium release-activated calcium modulator 2 [Source:MGI Symbol;Acc:MGI:2443195]
Dlgap3	5.69	5.09	-3.27	0.00194	0.0202	-0.874	-1.83	discs, large (Drosophila) homolog-associated protein 3 [Source:MGI Symbol;Acc:MGI:3039563]
Rpl6	6.02	5.24	-3.27	0.00194	0.0202	-0.814	-1.76	ribosomal protein L6 [Source:MGI Symbol;Acc:MGI:108057]
1810026J23Rik	6.3	5.97	-3.27	0.00195	0.0202	-0.4	-1.32	RIKEN cDNA 1810026J23 gene [Source:MGI Symbol;Acc:MGI:1917023]
Tmem115	4.7	4.15	-3.27	0.00195	0.0202	-0.663	-1.58	transmembrane protein 115 [Source:MGI Symbol;Acc:MGI:1930765]
Zfp280c	5.11	5.74	3.26	0.00196	0.0203	0.612	1.53	zinc finger protein 280C [Source:MGI Symbol;Acc:MGI:2387585]
Gnaz	6.72	6.27	-3.27	0.00196	0.0203	-0.369	-1.29	guanine nucleotide binding protein, alpha z subunit [Source:MGI Symbol;Acc:MGI:95780]
Chordc1	6.27	6.77	3.26	0.00196	0.0203	0.539	1.45	cysteine and histidine-rich domain (CHORD)-containing, zinc-binding protein 1 [Source:MGI Symbol;Acc:MGI:1914167]
Enkd1	2.32	1.58	-3.27	0.00196	0.0203	-1.09	-2.12	enkurin domain containing 1 [Source:MGI Symbol;Acc:MGI:2142593]
Igsf9b	2.26	3.23	3.26	0.00197	0.0203	1.08	2.11	immunoglobulin superfamily, member 9B [Source:MGI Symbol;Acc:MGI:2685354]
Yif1a	2.66	1.89	-3.26	0.00197	0.0203	-0.92	-1.89	Yip1 interacting factor homolog A (S. cerevisiae) [Source:MGI Symbol;Acc:MGI:1915340]
Fign	4.24	4.72	3.26	0.00197	0.0203	0.743	1.67	fidgetin [Source:MGI Symbol;Acc:MGI:1890647]
Fyn	7.12	6.83	-3.26	0.00197	0.0203	-0.334	-1.26	Fyn proto-oncogene [Source:MGI Symbol;Acc:MGI:95602]
Hn1	5.81	5.28	-3.26	0.00197	0.0203	-0.538	-1.45	hematological and neurological expressed sequence 1 [Source:MGI Symbol;Acc:MGI:1096361]
Sin3b	7.16	6.71	-3.26	0.00197	0.0203	-0.461	-1.38	transcriptional regulator, SIN3B (yeast) [Source:MGI Symbol;Acc:MGI:107158]
Zc3h12c	3.15	4.05	3.26	0.00197	0.0203	0.949	1.93	zinc finger CCCH type containing 12C [Source:MGI Symbol;Acc:MGI:3026959]
Rnf170	4.38	4.86	3.26	0.00198	0.0204	0.461	1.38	ring finger protein 170 [Source:MGI Symbol;Acc:MGI:1924983]
Cyb5r3	6.38	5.95	-3.26	0.00198	0.0204	-0.424	-1.34	cytochrome b5 reductase 3 [Source:MGI Symbol;Acc:MGI:94893]
Jund	5.87	5.33	-3.26	0.00199	0.0204	-0.666	-1.59	jun D proto-oncogene [Source:MGI Symbol;Acc:MGI:96648]
Esyt2	5.17	5.67	3.26	0.00199	0.0205	0.543	1.46	extended synaptotagmin-like protein 2 [Source:MGI Symbol;Acc:MGI:1261845]
Crh	2.38	0.815	-3.26	0.00199	0.0205	-1.66	-3.16	corticotropin releasing hormone [Source:MGI Symbol;Acc:MGI:88496]
Ambra1	6.69	6.37	-3.26	0.00199	0.0205	-0.359	-1.28	autophagy/beclin 1 regulator 1 [Source:MGI Symbol;Acc:MGI:2443564]
Ano7	1.96	1.29	-3.26	0.002	0.0205	-0.902	-1.87	anoctamin 7 [Source:MGI Symbol;Acc:MGI:3052714]
Sox3	1.61	0.344	-3.26	0.002	0.0205	-1.32	-2.5	SRY (sex determining region Y)-box 3 [Source:MGI Symbol;Acc:MGI:98365]
Get4	4.59	4.07	-3.26	0.002	0.0205	-0.724	-1.65	golgi to ER traffic protein 4 homolog (S. cerevisiae) [Source:MGI Symbol;Acc:MGI:1914854]
Plek	3.77	4.25	3.26	0.00201	0.0206	0.678	1.6	pleckstrin [Source:MGI Symbol;Acc:MGI:1860485]
Cdc73	5.84	6.45	3.26	0.00201	0.0206	0.627	1.54	cell division cycle 73, Paf1/RNA polymerase II complex component [Source:MGI Symbol;Acc:MGI:2384876]
Dcun1d1	5.43	5.83	3.26	0.00201	0.0206	0.562	1.48	DCN1, defective in cullin neddylation 1, domain containing 1 (S. cerevisiae) [Source:MGI Symbol;Acc:MGI:2150386]
Fam3c	5.72	6.03	3.26	0.00201	0.0206	0.425	1.34	family with sequence similarity 3, member C [Source:MGI Symbol;Acc:MGI:107892]
Rhov	3.64	2.9	-3.26	0.00201	0.0206	-0.87	-1.83	ras homolog gene family, member V [Source:MGI Symbol;Acc:MGI:2444227]
Tmem194b	3.31	3.93	3.26	0.00202	0.0206	0.53	1.44	transmembrane protein 194B [Source:MGI Symbol;Acc:MGI:2444113]
Clptm1	7.26	7.05	-3.25	0.00202	0.0206	-0.355	-1.28	cleft lip and palate associated transmembrane protein 1 [Source:MGI Symbol;Acc:MGI:1927155]
Hook1	6.01	6.48	3.26	0.00202	0.0206	0.573	1.49	hook homolog 1 (Drosophila) [Source:MGI Symbol;Acc:MGI:1925213]
Med25	5.05	4.66	-3.25	0.00202	0.0206	-0.677	-1.6	mediator complex subunit 25 [Source:MGI Symbol;Acc:MGI:1922863]
Tmem30a	8.99	9.43	3.26	0.00202	0.0206	0.459	1.37	transmembrane protein 30A [Source:MGI Symbol;Acc:MGI:106402]
Fbl	3.89	3.24	-3.25	0.00202	0.0206	-0.862	-1.82	fibrillarin [Source:MGI Symbol;Acc:MGI:95486]
Trappc13	6.26	6.52	3.25	0.00202	0.0206	0.383	1.3	trafficking protein particle complex 13 [Source:MGI Symbol;Acc:MGI:1914225]
Raver1	5.04	4.69	-3.25	0.00203	0.0206	-0.448	-1.36	ribonucleoprotein, PTB-binding 1 [Source:MGI Symbol;Acc:MGI:1919016]
Ttc34	2.25	1.49	-3.25	0.00203	0.0207	-0.736	-1.67	tetratricopeptide repeat domain 34 [Source:MGI Symbol;Acc:MGI:2445205]
Gm37891	0.203	2.07	3.25	0.00204	0.0207	1.68	3.19	predicted gene, 37891 [Source:MGI Symbol;Acc:MGI:5611119]
Pdia6	7.2	6.77	-3.25	0.00204	0.0207	-0.425	-1.34	protein disulfide isomerase associated 6 [Source:MGI Symbol;Acc:MGI:1919103]
Pign	4.6	5.07	3.25	0.00204	0.0207	0.55	1.46	phosphatidylinositol glycan anchor biosynthesis, class N [Source:MGI Symbol;Acc:MGI:1351629]
Prpf40a	6.27	6.77	3.25	0.00204	0.0207	0.651	1.57	PRP40 pre-mRNA processing factor 40 homolog A (yeast) [Source:MGI Symbol;Acc:MGI:1860512]
Sh3gl3	5.69	5.26	-3.25	0.00204	0.0207	-0.448	-1.36	SH3-domain GRB2-like 3 [Source:MGI Symbol;Acc:MGI:700011]
Gripap1	6.86	6.49	-3.25	0.00205	0.0208	-0.411	-1.33	GRIP1 associated protein 1 [Source:MGI Symbol;Acc:MGI:1859616]
Kcna5	4.35	3.62	-3.25	0.00205	0.0207	-0.71	-1.64	potassium voltage-gated channel, shaker-related subfamily, member 5 [Source:MGI Symbol;Acc:MGI:96662]
Gas2l1	5.35	4.93	-3.25	0.00205	0.0208	-0.497	-1.41	growth arrest-specific 2 like 1 [Source:MGI Symbol;Acc:MGI:1926176]
Rep15	0.774	-0.664	-3.25	0.00205	0.0208	-1.26	-2.39	RAB15 effector protein [Source:MGI Symbol;Acc:MGI:1913782]
Klf5	2.67	1.96	-3.25	0.00206	0.0208	-0.778	-1.71	Kruppel-like factor 5 [Source:MGI Symbol;Acc:MGI:1338056]
Cldn12	5.77	6.06	3.25	0.00206	0.0208	0.442	1.36	claudin 12 [Source:MGI Symbol;Acc:MGI:1929288]
Stk38l	5.33	5.68	3.25	0.00206	0.0208	0.452	1.37	serine/threonine kinase 38 like [Source:MGI Symbol;Acc:MGI:1922250]
Mycl	4.52	3.97	-3.25	0.00207	0.0209	-0.534	-1.45	v-myc myelocytomatosis viral oncogene homolog, lung carcinoma derived (avian) [Source:MGI Symbol;Acc:MGI:96799]
Alg11	5.73	6.15	3.25	0.00207	0.0209	0.437	1.35	asparagine-linked glycosylation 11 (alpha-1,2-mannosyltransferase) [Source:MGI Symbol;Acc:MGI:2142632]
Cdk19	5.68	6.2	3.25	0.00207	0.0209	0.421	1.34	cyclin-dependent kinase 19 [Source:MGI Symbol;Acc:MGI:1925584]
Cp	4.26	4.95	3.25	0.00207	0.0209	0.817	1.76	ceruloplasmin [Source:MGI Symbol;Acc:MGI:88476]
Rhno1	2.3	1.75	-3.25	0.00208	0.0209	-0.648	-1.57	RAD9-HUS1-RAD1 interacting nuclear orphan 1 [Source:MGI Symbol;Acc:MGI:1915315]
Chfr	5.93	6.28	3.25	0.00208	0.0209	0.355	1.28	checkpoint with forkhead and ring finger domains [Source:MGI Symbol;Acc:MGI:2444898]
Sox6	3.82	4.55	3.24	0.00208	0.021	0.669	1.59	SRY (sex determining region Y)-box 6 [Source:MGI Symbol;Acc:MGI:98368]
Dapk3	4.83	4.28	-3.24	0.00209	0.021	-0.536	-1.45	death-associated protein kinase 3 [Source:MGI Symbol;Acc:MGI:1203520]
Triqk	4.4	4.93	3.24	0.0021	0.0211	0.621	1.54	triple QxxK/R motif containing [Source:MGI Symbol;Acc:MGI:3650048]
Cntn1	8.74	9.13	3.24	0.0021	0.0211	0.382	1.3	contactin 1 [Source:MGI Symbol;Acc:MGI:105980]
Rrm2b	5.23	5.71	3.24	0.0021	0.0211	0.533	1.45	ribonucleotide reductase M2 B (TP53 inducible) [Source:MGI Symbol;Acc:MGI:2155865]
Gm11223	1.2	0.0434	-3.24	0.0021	0.0211	-1.78	-3.43	predicted gene 11223 [Source:MGI Symbol;Acc:MGI:3651631]
Rab3c	10.2	10.5	3.24	0.0021	0.0211	0.429	1.35	RAB3C, member RAS oncogene family [Source:MGI Symbol;Acc:MGI:1914545]
Cpt2	3.51	2.95	-3.24	0.00211	0.0211	-0.673	-1.59	carnitine palmitoyltransferase 2 [Source:MGI Symbol;Acc:MGI:109176]
Bcar1	4.77	4.22	-3.24	0.00211	0.0211	-0.743	-1.67	breast cancer anti-estrogen resistance 1 [Source:MGI Symbol;Acc:MGI:108091]
Ube2d1	6.26	6.65	3.24	0.00211	0.0211	0.528	1.44	ubiquitin-conjugating enzyme E2D 1 [Source:MGI Symbol;Acc:MGI:2384911]
Romo1	2.93	1.49	-3.24	0.00211	0.0211	-2.11	-4.33	reactive oxygen species modulator 1 [Source:MGI Symbol;Acc:MGI:1914317]
Dmtn	7.27	6.91	-3.24	0.00212	0.0211	-0.441	-1.36	dematin actin binding protein [Source:MGI Symbol;Acc:MGI:99670]
Xrcc3	4	3.54	-3.24	0.00212	0.0212	-0.5	-1.41	X-ray repair complementing defective repair in Chinese hamster cells 3 [Source:MGI Symbol;Acc:MGI:1921585]
Tubb2a	7.79	7.2	-3.24	0.00212	0.0211	-0.666	-1.59	tubulin, beta 2A class IIA [Source:MGI Symbol;Acc:MGI:107861]
Cnot3	5.21	4.91	-3.24	0.00212	0.0211	-0.4	-1.32	CCR4-NOT transcription complex, subunit 3 [Source:MGI Symbol;Acc:MGI:2385261]
Rbms1	5.25	5.64	3.24	0.00212	0.0212	0.585	1.5	RNA binding motif, single stranded interacting protein 1 [Source:MGI Symbol;Acc:MGI:1861774]
Wdr18	6.06	5.55	-3.24	0.00213	0.0212	-0.581	-1.5	WD repeat domain 18 [Source:MGI Symbol;Acc:MGI:2158400]
Npffr1	4.78	3.75	-3.24	0.00213	0.0212	-0.808	-1.75	neuropeptide FF receptor 1 [Source:MGI Symbol;Acc:MGI:2685082]
Actn1	6.15	5.77	-3.24	0.00213	0.0212	-0.477	-1.39	actinin, alpha 1 [Source:MGI Symbol;Acc:MGI:2137706]
Slc35a3	4.07	4.63	3.23	0.00214	0.0213	0.548	1.46	solute carrier family 35 (UDP-N-acetylglucosamine (UDP-GlcNAc) transporter), member 3 [Source:MGI Symbol;Acc:MGI:1917648]
Taf1	6.58	6.99	3.23	0.00214	0.0213	0.42	1.34	TAF1 RNA polymerase II, TATA box binding protein (TBP)-associated factor [Source:MGI Symbol;Acc:MGI:1336878]
Vstm2l	5.25	4.54	-3.24	0.00214	0.0213	-0.964	-1.95	V-set and transmembrane domain containing 2-like [Source:MGI Symbol;Acc:MGI:2685537]
Lrpap1	7.76	7.32	-3.23	0.00215	0.0214	-0.349	-1.27	low density lipoprotein receptor-related protein associated protein 1 [Source:MGI Symbol;Acc:MGI:96829]
B130055M24Rik	2.53	3.11	3.23	0.00215	0.0214	0.778	1.71	RIKEN cDNA B130055M24 gene [Source:MGI Symbol;Acc:MGI:3590645]
4931428F04Rik	4.43	4.15	-3.23	0.00215	0.0213	-0.508	-1.42	RIKEN cDNA 4931428F04 gene [Source:MGI Symbol;Acc:MGI:1921606]
Camkv	8.35	7.7	-3.23	0.00216	0.0214	-0.549	-1.46	CaM kinase-like vesicle-associated [Source:MGI Symbol;Acc:MGI:2384296]
Snap23	3.36	3.9	3.23	0.00216	0.0214	0.573	1.49	synaptosomal-associated protein 23 [Source:MGI Symbol;Acc:MGI:109356]
Psma4	5.69	5.21	-3.23	0.00216	0.0214	-0.566	-1.48	proteasome (prosome, macropain) subunit, alpha type 4 [Source:MGI Symbol;Acc:MGI:1347060]
Dnah1	6.07	5.48	-3.23	0.00216	0.0214	-0.67	-1.59	dynein, axonemal, heavy chain 1 [Source:MGI Symbol;Acc:MGI:107721]
Stra13	2.42	1.8	-3.23	0.00217	0.0215	-0.939	-1.92	stimulated by retinoic acid 13 [Source:MGI Symbol;Acc:MGI:894324]
Whsc1l1	6.73	7.07	3.23	0.00217	0.0215	0.336	1.26	Wolf-Hirschhorn syndrome candidate 1-like 1 (human) [Source:MGI Symbol;Acc:MGI:2142581]
Gmfb	7.49	7.87	3.23	0.00217	0.0215	0.418	1.34	glia maturation factor, beta [Source:MGI Symbol;Acc:MGI:1927133]
D8Ertd738e	4.11	3.22	-3.23	0.00217	0.0215	-0.992	-1.99	DNA segment, Chr 8, ERATO Doi 738, expressed [Source:MGI Symbol;Acc:MGI:1289231]
Mboat2	5.24	5.73	3.23	0.00218	0.0215	0.526	1.44	membrane bound O-acyltransferase domain containing 2 [Source:MGI Symbol;Acc:MGI:1914466]
Ubl3	7.98	8.26	3.23	0.00218	0.0215	0.395	1.31	ubiquitin-like 3 [Source:MGI Symbol;Acc:MGI:1344373]
Vat1	7.65	6.9	-3.23	0.00218	0.0215	-0.836	-1.79	vesicle amine transport protein 1 homolog (T californica) [Source:MGI Symbol;Acc:MGI:1349450]
Wipi2	7.78	7.51	-3.23	0.00218	0.0215	-0.293	-1.23	WD repeat domain, phosphoinositide interacting 2 [Source:MGI Symbol;Acc:MGI:1923831]
Sfi1	4.96	4.64	-3.23	0.00218	0.0215	-0.347	-1.27	Sfi1 homolog, spindle assembly associated (yeast) [Source:MGI Symbol;Acc:MGI:1926137]
Atad2b	2.39	3.42	3.23	0.00219	0.0215	0.907	1.88	ATPase family, AAA domain containing 2B [Source:MGI Symbol;Acc:MGI:2444798]
Sestd1	5.63	6.07	3.23	0.00219	0.0215	0.478	1.39	SEC14 and spectrin domains 1 [Source:MGI Symbol;Acc:MGI:1916262]
Aldh2	6.6	5.99	-3.23	0.00219	0.0215	-0.708	-1.63	aldehyde dehydrogenase 2, mitochondrial [Source:MGI Symbol;Acc:MGI:99600]
Gm38387	-0.982	0.461	3.23	0.00219	0.0215	1.61	3.04	predicted gene, 38387 [Source:MGI Symbol;Acc:MGI:5613622]
Pak6	5.69	5.27	-3.23	0.00219	0.0215	-0.477	-1.39	p21 protein (Cdc42/Rac)-activated kinase 6 [Source:MGI Symbol;Acc:MGI:2679420]
Ccdc42	0.323	-1.31	-3.23	0.00219	0.0215	-1.84	-3.57	coiled-coil domain containing 42 [Source:MGI Symbol;Acc:MGI:3045254]
Ddx39	4.02	3.56	-3.23	0.00219	0.0215	-0.607	-1.52	DEAD (Asp-Glu-Ala-Asp) box polypeptide 39 [Source:MGI Symbol;Acc:MGI:1915528]
Pfdn6	4.16	3.31	-3.23	0.00219	0.0215	-0.892	-1.86	prefoldin subunit 6 [Source:MGI Symbol;Acc:MGI:95908]
Slc16a1	5.29	5.64	3.23	0.0022	0.0215	0.489	1.4	solute carrier family 16 (monocarboxylic acid transporters), member 1 [Source:MGI Symbol;Acc:MGI:106013]
Pcbd1	4.21	3.49	-3.22	0.0022	0.0216	-0.977	-1.97	pterin 4 alpha carbinolamine dehydratase/dimerization cofactor of hepatocyte nuclear factor 1 alpha (TCF1) 1 [Source:MGI Symbol;Acc:MGI:94873]
Lrrc4c	6.59	6.9	3.22	0.00221	0.0216	0.473	1.39	leucine rich repeat containing 4C [Source:MGI Symbol;Acc:MGI:2442636]
Fbrs	4.9	4.47	-3.22	0.00221	0.0216	-0.436	-1.35	fibrosin [Source:MGI Symbol;Acc:MGI:104648]
Ict1	6.28	6.82	3.22	0.00221	0.0216	1.08	2.12	immature colon carcinoma transcript 1 [Source:MGI Symbol;Acc:MGI:1915822]
Chpt1	6.35	6.82	3.22	0.00221	0.0216	0.643	1.56	choline phosphotransferase 1 [Source:MGI Symbol;Acc:MGI:2384841]
Traf7	5.77	5.45	-3.22	0.00221	0.0216	-0.424	-1.34	TNF receptor-associated factor 7 [Source:MGI Symbol;Acc:MGI:3042141]
Atr	3.5	4.26	3.22	0.00222	0.0217	0.74	1.67	ataxia telangiectasia and Rad3 related [Source:MGI Symbol;Acc:MGI:108028]
Pcsk1n	9.46	8.59	-3.22	0.00222	0.0217	-0.921	-1.89	proprotein convertase subtilisin/kexin type 1 inhibitor [Source:MGI Symbol;Acc:MGI:1353431]
Nop56	5.91	5.53	-3.22	0.00222	0.0216	-0.545	-1.46	NOP56 ribonucleoprotein [Source:MGI Symbol;Acc:MGI:1914384]
Lrp8os2	1.62	0.927	-3.22	0.00222	0.0216	-1.03	-2.05	low density lipoprotein receptor-related protein 8, apolipoprotein e receptor, opposite strand 2 [Source:MGI Symbol;Acc:MGI:3588233]
Dcx	4.84	5.35	3.22	0.00223	0.0217	0.59	1.51	doublecortin [Source:MGI Symbol;Acc:MGI:1277171]
Kitl	4.08	4.92	3.22	0.00223	0.0217	0.975	1.97	kit ligand [Source:MGI Symbol;Acc:MGI:96974]
Gm21846	1.02	1.97	3.22	0.00223	0.0217	1.46	2.75	predicted gene, 21846 [Source:MGI Symbol;Acc:MGI:5434010]
Smpd2	4.82	4.42	-3.22	0.00223	0.0217	-0.482	-1.4	sphingomyelin phosphodiesterase 2, neutral [Source:MGI Symbol;Acc:MGI:1278330]
Mtmr2	6.07	6.41	3.22	0.00223	0.0217	0.382	1.3	myotubularin related protein 2 [Source:MGI Symbol;Acc:MGI:1924366]
AU041133	2.45	2.89	3.22	0.00224	0.0218	0.689	1.61	expressed sequence AU041133 [Source:MGI Symbol;Acc:MGI:2143755]
Tbcc	3.98	3.29	-3.22	0.00224	0.0218	-0.735	-1.66	tubulin-specific chaperone C [Source:MGI Symbol;Acc:MGI:1919976]
Aff4	8.08	8.58	3.22	0.00224	0.0217	0.489	1.4	AF4/FMR2 family, member 4 [Source:MGI Symbol;Acc:MGI:2136171]
Rufy4	0.212	-1.56	-3.22	0.00225	0.0218	-1.8	-3.49	RUN and FYVE domain containing 4 [Source:MGI Symbol;Acc:MGI:3588214]
Col23a1	5.12	4.47	-3.22	0.00225	0.0218	-0.915	-1.89	collagen, type XXIII, alpha 1 [Source:MGI Symbol;Acc:MGI:2653243]
Smarcc2	8.13	7.96	-3.22	0.00226	0.0219	-0.308	-1.24	SWI/SNF related, matrix associated, actin dependent regulator of chromatin, subfamily c, member 2 [Source:MGI Symbol;Acc:MGI:1915344]
Cidea	0.528	-0.698	-3.22	0.00226	0.0219	-1.57	-2.97	cell death-inducing DNA fragmentation factor, alpha subunit-like effector A [Source:MGI Symbol;Acc:MGI:1270845]
Adam23	7.28	7.74	3.22	0.00226	0.0219	0.489	1.4	a disintegrin and metallopeptidase domain 23 [Source:MGI Symbol;Acc:MGI:1345162]
Sox13	3.53	2.9	-3.22	0.00226	0.0219	-0.667	-1.59	SRY (sex determining region Y)-box 13 [Source:MGI Symbol;Acc:MGI:98361]
Ctu2	3.62	2.87	-3.22	0.00226	0.0218	-0.835	-1.78	cytosolic thiouridylase subunit 2 homolog (S. pombe) [Source:MGI Symbol;Acc:MGI:1914215]
Gas8	4.08	3.38	-3.22	0.00226	0.0219	-0.744	-1.67	growth arrest specific 8 [Source:MGI Symbol;Acc:MGI:1202386]
Tor1a	4.88	4.39	-3.21	0.00227	0.0219	-0.588	-1.5	torsin family 1, member A (torsin A) [Source:MGI Symbol;Acc:MGI:1353568]
Btbd3	6.93	7.35	3.21	0.00227	0.0219	0.43	1.35	BTB (POZ) domain containing 3 [Source:MGI Symbol;Acc:MGI:2385155]
Slc45a1	6.23	5.78	-3.21	0.00227	0.0219	-0.473	-1.39	solute carrier family 45, member 1 [Source:MGI Symbol;Acc:MGI:2653235]
Fam169a	6.71	7.15	3.22	0.00227	0.0219	0.523	1.44	family with sequence similarity 169, member A [Source:MGI Symbol;Acc:MGI:2444268]
Trim37	8.15	8.59	3.21	0.00227	0.0219	0.409	1.33	tripartite motif-containing 37 [Source:MGI Symbol;Acc:MGI:2153072]
Tmem110	5.15	4.86	-3.21	0.00228	0.0219	-0.372	-1.29	transmembrane protein 110 [Source:MGI Symbol;Acc:MGI:1921500]
Adal	4.64	5.04	3.21	0.00228	0.0219	0.446	1.36	adenosine deaminase-like [Source:MGI Symbol;Acc:MGI:1923144]
Nt5c	3.66	2.78	-3.21	0.00228	0.0219	-1.08	-2.12	5',3'-nucleotidase, cytosolic [Source:MGI Symbol;Acc:MGI:1354954]
Csnk1a1	8.36	8.68	3.21	0.00229	0.022	0.432	1.35	casein kinase 1, alpha 1 [Source:MGI Symbol;Acc:MGI:1934950]
Col27a1	3.65	3.24	-3.21	0.00229	0.022	-0.746	-1.68	collagen, type XXVII, alpha 1 [Source:MGI Symbol;Acc:MGI:2672118]
Mrps26	4.43	3.69	-3.21	0.00229	0.022	-0.942	-1.92	mitochondrial ribosomal protein S26 [Source:MGI Symbol;Acc:MGI:1333830]
Rltpr	4.23	3.5	-3.21	0.0023	0.0221	-1.06	-2.08	RGD motif, leucine rich repeats, tropomodulin domain and proline-rich containing [Source:MGI Symbol;Acc:MGI:2685431]
Nup155	4.97	5.48	3.21	0.0023	0.022	0.494	1.41	nucleoporin 155 [Source:MGI Symbol;Acc:MGI:2181182]
Rnf14	9.03	9.33	3.21	0.0023	0.022	0.422	1.34	ring finger protein 14 [Source:MGI Symbol;Acc:MGI:1929668]
Traip	4.21	3.36	-3.21	0.0023	0.022	-0.832	-1.78	TRAF-interacting protein [Source:MGI Symbol;Acc:MGI:1096377]
Chpf2	6.13	5.84	-3.21	0.0023	0.022	-0.505	-1.42	chondroitin polymerizing factor 2 [Source:MGI Symbol;Acc:MGI:1917522]
Tmed5	5.57	6.03	3.21	0.00231	0.0221	0.778	1.71	transmembrane emp24 protein transport domain containing 5 [Source:MGI Symbol;Acc:MGI:1921586]
Ostm1	6.17	6.48	3.21	0.00232	0.0222	0.421	1.34	osteopetrosis associated transmembrane protein 1 [Source:MGI Symbol;Acc:MGI:2655574]
Pcdhb18	2.01	2.89	3.21	0.00232	0.0222	0.78	1.72	protocadherin beta 18 [Source:MGI Symbol;Acc:MGI:2136756]
Cdh22	6.08	5.55	-3.2	0.00233	0.0223	-0.553	-1.47	cadherin 22 [Source:MGI Symbol;Acc:MGI:1341843]
Prex2	4.98	5.64	3.21	0.00233	0.0222	0.737	1.67	phosphatidylinositol-3,4,5-trisphosphate-dependent Rac exchange factor 2 [Source:MGI Symbol;Acc:MGI:1923385]
1110037F02Rik	6.06	6.55	3.21	0.00233	0.0222	0.505	1.42	RIKEN cDNA 1110037F02 gene [Source:MGI Symbol;Acc:MGI:1913435]
E4f1	4.92	4.43	-3.2	0.00234	0.0223	-0.48	-1.39	E4F transcription factor 1 [Source:MGI Symbol;Acc:MGI:109530]
Mettl18	2.5	2.01	-3.2	0.00234	0.0223	-0.75	-1.68	methyltransferase like 18 [Source:MGI Symbol;Acc:MGI:1917212]
Rhbdf1	3.8	3.49	-3.2	0.00235	0.0224	-0.613	-1.53	rhomboid family 1 (Drosophila) [Source:MGI Symbol;Acc:MGI:104328]
Sema3d	3	3.73	3.2	0.00235	0.0224	0.884	1.85	sema domain, immunoglobulin domain (Ig), short basic domain, secreted, (semaphorin) 3D [Source:MGI Symbol;Acc:MGI:1860118]
Chkb	4.56	4.11	-3.2	0.00235	0.0223	-0.575	-1.49	choline kinase beta [Source:MGI Symbol;Acc:MGI:1328313]
Akr7a5	4.28	3.74	-3.2	0.00235	0.0223	-0.666	-1.59	aldo-keto reductase family 7, member A5 (aflatoxin aldehyde reductase) [Source:MGI Symbol;Acc:MGI:107796]
Ipo13	6.64	6.23	-3.2	0.00235	0.0223	-0.516	-1.43	importin 13 [Source:MGI Symbol;Acc:MGI:2385205]
Paip2	7.79	8.08	3.2	0.00235	0.0223	0.456	1.37	polyadenylate-binding protein-interacting protein 2 [Source:MGI Symbol;Acc:MGI:1915119]
Zfp738	3.36	3.9	3.2	0.00235	0.0223	0.67	1.59	zinc finger protein 738 [Source:MGI Symbol;Acc:MGI:3040706]
Pde7a	4.96	5.31	3.2	0.00236	0.0224	0.377	1.3	phosphodiesterase 7A [Source:MGI Symbol;Acc:MGI:1202402]
Npc2	5.16	4.69	-3.2	0.00236	0.0224	-0.571	-1.49	Niemann-Pick type C2 [Source:MGI Symbol;Acc:MGI:1915213]
Pdpr	4.07	5.01	3.2	0.00236	0.0224	0.691	1.61	pyruvate dehydrogenase phosphatase regulatory subunit [Source:MGI Symbol;Acc:MGI:2442188]
Bcl2l1	6.98	6.64	-3.2	0.00236	0.0224	-0.414	-1.33	BCL2-like 1 [Source:MGI Symbol;Acc:MGI:88139]
Klhdc4	4.73	4.13	-3.2	0.00236	0.0224	-0.567	-1.48	kelch domain containing 4 [Source:MGI Symbol;Acc:MGI:2384569]
Dpm3	1.61	0.45	-3.2	0.00236	0.0224	-1.9	-3.74	dolichyl-phosphate mannosyltransferase polypeptide 3 [Source:MGI Symbol;Acc:MGI:1915813]
Ddx39b	7.73	7.46	-3.2	0.00237	0.0224	-0.374	-1.3	DEAD (Asp-Glu-Ala-Asp) box polypeptide 39B [Source:MGI Symbol;Acc:MGI:99240]
Hsf1	5.13	4.69	-3.2	0.00237	0.0224	-0.489	-1.4	heat shock factor 1 [Source:MGI Symbol;Acc:MGI:96238]
Gm16740	0.508	1.24	3.2	0.00238	0.0225	1.36	2.56	predicted gene, 16740 [Source:MGI Symbol;Acc:MGI:4439664]
Arhgap33	5.68	5.31	-3.2	0.00238	0.0225	-0.579	-1.49	Rho GTPase activating protein 33 [Source:MGI Symbol;Acc:MGI:2673998]
Srf	4.53	4.04	-3.2	0.00238	0.0225	-0.552	-1.47	serum response factor [Source:MGI Symbol;Acc:MGI:106658]
Golga2	6.77	6.32	-3.2	0.00238	0.0225	-0.478	-1.39	golgi autoantigen, golgin subfamily a, 2 [Source:MGI Symbol;Acc:MGI:2139395]
Zfp655	4.79	5.29	3.2	0.00238	0.0225	0.624	1.54	zinc finger protein 655 [Source:MGI Symbol;Acc:MGI:1919861]
Srp68	6.26	5.87	-3.2	0.00238	0.0225	-0.416	-1.33	signal recognition particle 68 [Source:MGI Symbol;Acc:MGI:1917447]
Rnft1	3.91	4.28	3.2	0.00238	0.0225	0.501	1.42	ring finger protein, transmembrane 1 [Source:MGI Symbol;Acc:MGI:1924142]
Megf8	8.83	8.39	-3.2	0.00239	0.0225	-0.524	-1.44	multiple EGF-like-domains 8 [Source:MGI Symbol;Acc:MGI:2446294]
Gm16617	-2.09	-0.508	3.2	0.00239	0.0225	2.07	4.2	predicted gene, 16617 [Source:MGI Symbol;Acc:MGI:4439541]
Rhebl1	3.4	2.89	-3.2	0.00239	0.0225	-0.549	-1.46	Ras homolog enriched in brain like 1 [Source:MGI Symbol;Acc:MGI:1916409]
Sacs	5.87	6.59	3.19	0.0024	0.0226	0.639	1.56	sacsin [Source:MGI Symbol;Acc:MGI:1354724]
Dhx30	7.1	6.83	-3.2	0.0024	0.0225	-0.308	-1.24	DEAH (Asp-Glu-Ala-His) box polypeptide 30 [Source:MGI Symbol;Acc:MGI:1920081]
Map3k11	3.99	3.46	-3.2	0.0024	0.0226	-0.827	-1.77	mitogen-activated protein kinase kinase kinase 11 [Source:MGI Symbol;Acc:MGI:1346880]
Usp45	5.07	5.66	3.19	0.00241	0.0226	0.64	1.56	ubiquitin specific petidase 45 [Source:MGI Symbol;Acc:MGI:101850]
Haus6	3.52	4.06	3.19	0.00242	0.0227	0.49	1.4	HAUS augmin-like complex, subunit 6 [Source:MGI Symbol;Acc:MGI:1923389]
Nupl1	4.48	5.04	3.19	0.00242	0.0227	0.467	1.38	nucleoporin like 1 [Source:MGI Symbol;Acc:MGI:1919094]
Aamp	7.59	7.05	-3.19	0.00242	0.0227	-0.502	-1.42	angio-associated migratory protein [Source:MGI Symbol;Acc:MGI:107809]
Dopey1	5.95	6.45	3.19	0.00242	0.0227	0.469	1.38	dopey family member 1 [Source:MGI Symbol;Acc:MGI:1289294]
Fbxl6	4.66	4.14	-3.19	0.00242	0.0227	-0.624	-1.54	F-box and leucine-rich repeat protein 6 [Source:MGI Symbol;Acc:MGI:1354705]
Eri2	2.9	3.43	3.19	0.00243	0.0227	0.564	1.48	exoribonuclease 2 [Source:MGI Symbol;Acc:MGI:1918401]
Smad4	5.41	5.83	3.19	0.00243	0.0227	0.421	1.34	SMAD family member 4 [Source:MGI Symbol;Acc:MGI:894293]
Kcnn2	4.68	5.05	3.19	0.00243	0.0227	0.43	1.35	potassium intermediate/small conductance calcium-activated channel, subfamily N, member 2 [Source:MGI Symbol;Acc:MGI:2153182]
Lgalsl	5.85	6.27	3.19	0.00243	0.0227	0.551	1.46	lectin, galactoside binding-like [Source:MGI Symbol;Acc:MGI:1916114]
Ido2	1.59	1.02	-3.19	0.00244	0.0228	-0.78	-1.72	indoleamine 2,3-dioxygenase 2 [Source:MGI Symbol;Acc:MGI:2142489]
Rnh1	6.12	5.71	-3.19	0.00244	0.0228	-0.459	-1.37	ribonuclease/angiogenin inhibitor 1 [Source:MGI Symbol;Acc:MGI:1195456]
Hnmt	4.51	4.84	3.19	0.00244	0.0228	0.605	1.52	histamine N-methyltransferase [Source:MGI Symbol;Acc:MGI:2153181]
Rcan2	8.42	8.8	3.19	0.00245	0.0228	0.36	1.28	regulator of calcineurin 2 [Source:MGI Symbol;Acc:MGI:1858219]
Spag7	4.98	4.32	-3.19	0.00245	0.0228	-0.755	-1.69	sperm associated antigen 7 [Source:MGI Symbol;Acc:MGI:107380]
Cabin1	6.26	6.01	-3.19	0.00245	0.0228	-0.424	-1.34	calcineurin binding protein 1 [Source:MGI Symbol;Acc:MGI:1298375]
Nckap5l	4.1	3.61	-3.19	0.00246	0.0229	-0.639	-1.56	NCK-associated protein 5-like [Source:MGI Symbol;Acc:MGI:3609653]
Cyth2	5.33	4.81	-3.19	0.00246	0.0229	-0.599	-1.51	cytohesin 2 [Source:MGI Symbol;Acc:MGI:1334255]
Eif4g3	7.74	7.44	-3.19	0.00246	0.0229	-0.402	-1.32	eukaryotic translation initiation factor 4 gamma, 3 [Source:MGI Symbol;Acc:MGI:1923935]
Gigyf1	6.91	6.56	-3.19	0.00246	0.0229	-0.358	-1.28	GRB10 interacting GYF protein 1 [Source:MGI Symbol;Acc:MGI:1888677]
Fam135b	1.62	3.46	3.19	0.00247	0.0229	1.71	3.26	family with sequence similarity 135, member B [Source:MGI Symbol;Acc:MGI:1917613]
Snx22	4.28	3.88	-3.18	0.00247	0.0229	-0.548	-1.46	sorting nexin 22 [Source:MGI Symbol;Acc:MGI:2685966]
Isyna1	4.95	4.46	-3.18	0.00247	0.0229	-0.669	-1.59	myo-inositol 1-phosphate synthase A1 [Source:MGI Symbol;Acc:MGI:1919030]
Mccc1	5.37	5.81	3.19	0.00247	0.0229	0.426	1.34	methylcrotonoyl-Coenzyme A carboxylase 1 (alpha) [Source:MGI Symbol;Acc:MGI:1919289]
9330136K24Rik	0.67	1.49	3.18	0.00248	0.023	1.09	2.12	RIKEN cDNA 9330136K24 gene [Source:MGI Symbol;Acc:MGI:2442883]
Cdh20	4.83	5.26	3.18	0.00248	0.023	0.551	1.46	cadherin 20 [Source:MGI Symbol;Acc:MGI:1346069]
Smurf1	5.88	5.6	-3.18	0.00248	0.023	-0.418	-1.34	SMAD specific E3 ubiquitin protein ligase 1 [Source:MGI Symbol;Acc:MGI:1923038]
Cndp2	5.59	5.2	-3.18	0.00248	0.023	-0.533	-1.45	CNDP dipeptidase 2 (metallopeptidase M20 family) [Source:MGI Symbol;Acc:MGI:1913304]
Atp5s	4.38	4.65	3.18	0.00248	0.023	0.566	1.48	ATP synthase, H+ transporting, mitochondrial F0 complex, subunit S [Source:MGI Symbol;Acc:MGI:1915305]
Ubxn1	6.01	5.33	-3.18	0.00249	0.023	-0.631	-1.55	UBX domain protein 1 [Source:MGI Symbol;Acc:MGI:1289301]
Ap4m1	4.63	4.41	-3.18	0.00249	0.023	-0.386	-1.31	adaptor-related protein complex AP-4, mu 1 [Source:MGI Symbol;Acc:MGI:1337063]
Ubxn2b	5.5	5.99	3.18	0.00249	0.023	0.519	1.43	UBX domain protein 2B [Source:MGI Symbol;Acc:MGI:1915303]
Kcnq3	7.1	7.59	3.18	0.0025	0.0231	0.544	1.46	potassium voltage-gated channel, subfamily Q, member 3 [Source:MGI Symbol;Acc:MGI:1336181]
Wdr37	7.42	7.75	3.18	0.0025	0.0231	0.389	1.31	WD repeat domain 37 [Source:MGI Symbol;Acc:MGI:1920393]
Bloc1s1	0.865	-0.71	-3.18	0.0025	0.0231	-2.16	-4.47	biogenesis of lysosomal organelles complex-1, subunit 1 [Source:MGI Symbol;Acc:MGI:1195276]
Acsl4	6.78	7.36	3.18	0.00251	0.0231	0.778	1.71	acyl-CoA synthetase long-chain family member 4 [Source:MGI Symbol;Acc:MGI:1354713]
Eif3g	5.31	4.59	-3.18	0.00251	0.0231	-0.809	-1.75	eukaryotic translation initiation factor 3, subunit G [Source:MGI Symbol;Acc:MGI:1858258]
Ssh3	5.72	5.48	-3.18	0.00251	0.0231	-0.429	-1.35	slingshot homolog 3 (Drosophila) [Source:MGI Symbol;Acc:MGI:2683546]
Tmem39b	3.35	2.99	-3.18	0.00252	0.0232	-0.553	-1.47	transmembrane protein 39b [Source:MGI Symbol;Acc:MGI:2682939]
Ggps1	5.3	5.84	3.18	0.00252	0.0232	0.574	1.49	geranylgeranyl diphosphate synthase 1 [Source:MGI Symbol;Acc:MGI:1341724]
Atp5sl	5.37	4.98	-3.18	0.00252	0.0232	-0.425	-1.34	ATP5S-like [Source:MGI Symbol;Acc:MGI:1913599]
Oscp1	5.84	5.5	-3.18	0.00252	0.0231	-0.387	-1.31	organic solute carrier partner 1 [Source:MGI Symbol;Acc:MGI:1916308]
Ptchd2	5.45	4.97	-3.18	0.00252	0.0231	-0.618	-1.54	patched domain containing 2 [Source:MGI Symbol;Acc:MGI:2444403]
Rttn	3.28	3.79	3.18	0.00253	0.0232	0.671	1.59	rotatin [Source:MGI Symbol;Acc:MGI:2179288]
Dohh	5.19	4.51	-3.18	0.00253	0.0232	-0.731	-1.66	deoxyhypusine hydroxylase/monooxygenase [Source:MGI Symbol;Acc:MGI:1915964]
Cbx7	6.46	6.2	-3.18	0.00253	0.0232	-0.39	-1.31	chromobox 7 [Source:MGI Symbol;Acc:MGI:1196439]
Ppapdc3	3.73	3.34	-3.18	0.00254	0.0233	-0.636	-1.55	phosphatidic acid phosphatase type 2 domain containing 3 [Source:MGI Symbol;Acc:MGI:2445183]
Arl10	5.54	4.96	-3.18	0.00254	0.0233	-0.771	-1.71	ADP-ribosylation factor-like 10 [Source:MGI Symbol;Acc:MGI:1930788]
Adgrl3	6.65	7.07	3.18	0.00254	0.0233	0.498	1.41	adhesion G protein-coupled receptor L3 [Source:MGI Symbol;Acc:MGI:2441950]
Slc30a7	4.61	5.21	3.17	0.00255	0.0233	0.604	1.52	solute carrier family 30 (zinc transporter), member 7 [Source:MGI Symbol;Acc:MGI:1913750]
C1ql2	3.9	2.83	-3.17	0.00255	0.0233	-0.981	-1.97	complement component 1, q subcomponent-like 2 [Source:MGI Symbol;Acc:MGI:3032521]
Pnkp	4.4	3.9	-3.17	0.00255	0.0233	-0.648	-1.57	polynucleotide kinase 3'- phosphatase [Source:MGI Symbol;Acc:MGI:1891698]
Gpaa1	4.65	4.15	-3.17	0.00255	0.0233	-0.718	-1.64	GPI anchor attachment protein 1 [Source:MGI Symbol;Acc:MGI:1202392]
Syt14	4.82	5.21	3.17	0.00256	0.0233	0.468	1.38	synaptotagmin XIV [Source:MGI Symbol;Acc:MGI:2444490]
A230001M10Rik	1.07	2.21	3.17	0.00256	0.0233	1.28	2.43	RIKEN cDNA A230001M10 gene [Source:MGI Symbol;Acc:MGI:2443043]
Steap3	1.91	1.3	-3.17	0.00256	0.0233	-0.807	-1.75	STEAP family member 3 [Source:MGI Symbol;Acc:MGI:1915678]
Dalrd3	6.08	5.73	-3.17	0.00256	0.0233	-0.439	-1.36	DALR anticodon binding domain containing 3 [Source:MGI Symbol;Acc:MGI:1915039]
Chmp2a	4.64	3.9	-3.17	0.00257	0.0234	-0.981	-1.97	charged multivesicular body protein 2A [Source:MGI Symbol;Acc:MGI:1916203]
Rbm41	1.29	2.33	3.17	0.00257	0.0234	0.847	1.8	RNA binding motif protein 41 [Source:MGI Symbol;Acc:MGI:2444923]
Znrd1	3.04	2.32	-3.17	0.00257	0.0234	-0.867	-1.82	zinc ribbon domain containing, 1 [Source:MGI Symbol;Acc:MGI:1913386]
Ighmbp2	3.44	3.05	-3.17	0.00258	0.0235	-0.603	-1.52	immunoglobulin mu binding protein 2 [Source:MGI Symbol;Acc:MGI:99954]
Arhgdia	7.77	7.21	-3.17	0.00259	0.0236	-0.556	-1.47	Rho GDP dissociation inhibitor (GDI) alpha [Source:MGI Symbol;Acc:MGI:2178103]
Flrt2	5.23	5.74	3.17	0.00259	0.0235	0.631	1.55	fibronectin leucine rich transmembrane protein 2 [Source:MGI Symbol;Acc:MGI:3603594]
Gm16170	-0.0388	1.31	3.17	0.0026	0.0236	1.29	2.45	predicted gene 16170 [Source:MGI Symbol;Acc:MGI:3805548]
Deaf1	5.4	5.03	-3.17	0.00261	0.0237	-0.46	-1.38	deformed epidermal autoregulatory factor 1 (Drosophila) [Source:MGI Symbol;Acc:MGI:1858496]
Ptchd1	3.27	4.14	3.17	0.00261	0.0236	0.813	1.76	patched domain containing 1 [Source:MGI Symbol;Acc:MGI:2685233]
Luc7l2	7.55	8	3.17	0.00261	0.0236	0.433	1.35	LUC7-like 2 (S. cerevisiae) [Source:MGI Symbol;Acc:MGI:2183260]
Spata21	-0.201	-2.04	-3.17	0.00261	0.0236	-2.09	-4.26	spermatogenesis associated 21 [Source:MGI Symbol;Acc:MGI:3607787]
Gstz1	5.17	4.87	-3.17	0.00261	0.0236	-0.366	-1.29	glutathione transferase zeta 1 (maleylacetoacetate isomerase) [Source:MGI Symbol;Acc:MGI:1341859]
Fdx1l	3.94	3.19	-3.16	0.00262	0.0237	-1.05	-2.07	ferredoxin 1-like [Source:MGI Symbol;Acc:MGI:1915415]
Mlycd	4.02	3.39	-3.16	0.00263	0.0238	-0.712	-1.64	malonyl-CoA decarboxylase [Source:MGI Symbol;Acc:MGI:1928485]
Lgi1	6.12	6.49	3.16	0.00263	0.0238	0.491	1.41	leucine-rich repeat LGI family, member 1 [Source:MGI Symbol;Acc:MGI:1861691]
Mgat4a	6.29	6.55	3.16	0.00263	0.0238	0.308	1.24	mannoside acetylglucosaminyltransferase 4, isoenzyme A [Source:MGI Symbol;Acc:MGI:2662992]
1700017B05Rik	4.57	4.12	-3.16	0.00263	0.0238	-0.473	-1.39	RIKEN cDNA 1700017B05 gene [Source:MGI Symbol;Acc:MGI:1921461]
Mib2	6.56	6.05	-3.16	0.00263	0.0238	-0.614	-1.53	mindbomb homolog 2 (Drosophila) [Source:MGI Symbol;Acc:MGI:2679684]
Hmgcs2	3.77	2.95	-3.16	0.00263	0.0238	-0.871	-1.83	3-hydroxy-3-methylglutaryl-Coenzyme A synthase 2 [Source:MGI Symbol;Acc:MGI:101939]
Flot1	5.68	5.17	-3.16	0.00263	0.0238	-0.681	-1.6	flotillin 1 [Source:MGI Symbol;Acc:MGI:1100500]
Il1r1	2.74	3.6	3.16	0.00264	0.0238	0.766	1.7	interleukin 1 receptor, type I [Source:MGI Symbol;Acc:MGI:96545]
Gm36989	0.0944	2.48	3.16	0.00264	0.0238	2.1	4.27	predicted gene, 36989 [Source:MGI Symbol;Acc:MGI:5610217]
Aldh1a1	6.01	7.07	3.16	0.00264	0.0238	0.957	1.94	aldehyde dehydrogenase family 1, subfamily A1 [Source:MGI Symbol;Acc:MGI:1353450]
Gm4944	1.81	2.53	3.16	0.00265	0.0239	1.07	2.11	predicted gene 4944 [Source:MGI Symbol;Acc:MGI:3643318]
Abhd11	4.03	3.54	-3.16	0.00265	0.0238	-0.587	-1.5	abhydrolase domain containing 11 [Source:MGI Symbol;Acc:MGI:1916008]
Rps4l	3.46	2.55	-3.16	0.00265	0.0239	-0.777	-1.71	ribosomal protein S4-like [Source:MGI Symbol;Acc:MGI:1913434]
Kif5b	8.3	8.85	3.16	0.00266	0.0239	0.504	1.42	kinesin family member 5B [Source:MGI Symbol;Acc:MGI:1098268]
Oaz2	6.8	6.45	-3.16	0.00266	0.0239	-0.435	-1.35	ornithine decarboxylase antizyme 2 [Source:MGI Symbol;Acc:MGI:109492]
B230369F24Rik	1.47	2.38	3.16	0.00267	0.024	0.722	1.65	RIKEN cDNA B230369F24 gene [Source:MGI Symbol;Acc:MGI:2443392]
Fem1a	5.7	5.36	-3.16	0.00267	0.0239	-0.392	-1.31	feminization 1 homolog a (C. elegans) [Source:MGI Symbol;Acc:MGI:1335089]
5530401A14Rik	0.278	0.87	3.16	0.00268	0.024	1.27	2.4	RIKEN cDNA 5530401A14 gene [Source:MGI Symbol;Acc:MGI:1918638]
Brf1	5.18	4.78	-3.16	0.00268	0.024	-0.369	-1.29	BRF1 homolog, subunit of RNA polymerase III transcription initiation factor IIIB (S. cerevisiae) [Source:MGI Symbol;Acc:MGI:1919558]
Chmp1a	6.11	5.57	-3.16	0.00268	0.024	-0.691	-1.61	charged multivesicular body protein 1A [Source:MGI Symbol;Acc:MGI:1920159]
Anapc1	6.82	7.24	3.15	0.00269	0.0241	0.393	1.31	anaphase promoting complex subunit 1 [Source:MGI Symbol;Acc:MGI:103097]
Gxylt1	4.36	4.75	3.16	0.00269	0.024	0.496	1.41	glucoside xylosyltransferase 1 [Source:MGI Symbol;Acc:MGI:2684933]
Clcn5	5.52	6.05	3.16	0.00269	0.024	0.63	1.55	chloride channel, voltage-sensitive 5 [Source:MGI Symbol;Acc:MGI:99486]
Mafk	4.2	3.71	-3.16	0.00269	0.024	-0.626	-1.54	v-maf musculoaponeurotic fibrosarcoma oncogene family, protein K (avian) [Source:MGI Symbol;Acc:MGI:99951]
Gorasp1	4.48	4.16	-3.16	0.00269	0.024	-0.488	-1.4	golgi reassembly stacking protein 1 [Source:MGI Symbol;Acc:MGI:1921748]
Slc2a13	6.88	7.33	3.16	0.00269	0.024	0.511	1.43	solute carrier family 2 (facilitated glucose transporter), member 13 [Source:MGI Symbol;Acc:MGI:2146030]
Sema6d	6.51	6.99	3.16	0.00269	0.024	0.389	1.31	sema domain, transmembrane domain (TM), and cytoplasmic domain, (semaphorin) 6D [Source:MGI Symbol;Acc:MGI:2387661]
Neurl1a	5.6	5.15	-3.16	0.00269	0.024	-0.564	-1.48	neuralized E3 ubiquitin protein ligase 1A [Source:MGI Symbol;Acc:MGI:1334263]
Asprv1	0.29	-0.718	-3.15	0.0027	0.0241	-1.26	-2.4	aspartic peptidase, retroviral-like 1 [Source:MGI Symbol;Acc:MGI:1915105]
Psmd4	6.93	6.47	-3.15	0.0027	0.0241	-0.529	-1.44	proteasome (prosome, macropain) 26S subunit, non-ATPase, 4 [Source:MGI Symbol;Acc:MGI:1201670]
Thsd7a	5.5	6.06	3.15	0.0027	0.0241	0.628	1.55	thrombospondin, type I, domain containing 7A [Source:MGI Symbol;Acc:MGI:2685683]
Xrn1	5.74	6.2	3.15	0.00271	0.0242	0.514	1.43	5'-3' exoribonuclease 1 [Source:MGI Symbol;Acc:MGI:891964]
Lrrfip1	5.95	5.63	-3.15	0.00271	0.0242	-0.354	-1.28	leucine rich repeat (in FLII) interacting protein 1 [Source:MGI Symbol;Acc:MGI:1342770]
Cdk7	5.67	6.09	3.15	0.00272	0.0242	0.442	1.36	cyclin-dependent kinase 7 [Source:MGI Symbol;Acc:MGI:102956]
9630010A21Rik	-0.677	0.268	3.15	0.00272	0.0242	2	3.99	RIKEN cDNA 9630010A21 gene [Source:MGI Symbol;Acc:MGI:2442787]
2310035C23Rik	6.22	6.71	3.15	0.00272	0.0242	0.516	1.43	RIKEN cDNA 2310035C23 gene [Source:MGI Symbol;Acc:MGI:1922832]
Hmga1	4.61	4.12	-3.15	0.00272	0.0242	-0.62	-1.54	high mobility group AT-hook 1 [Source:MGI Symbol;Acc:MGI:96160]
NA	0.996	2.21	3.15	0.00272	0.0242	1.41	2.65	NA
Asah2	4.53	5.29	3.15	0.00273	0.0242	0.633	1.55	N-acylsphingosine amidohydrolase 2 [Source:MGI Symbol;Acc:MGI:1859310]
Rcbtb1	6.75	7.05	3.15	0.00273	0.0242	0.383	1.3	regulator of chromosome condensation (RCC1) and BTB (POZ) domain containing protein 1 [Source:MGI Symbol;Acc:MGI:1918580]
Ccdc141	4.84	5.44	3.15	0.00273	0.0242	0.635	1.55	coiled-coil domain containing 141 [Source:MGI Symbol;Acc:MGI:1919735]
Ubac2	4.93	4.64	-3.15	0.00274	0.0243	-0.439	-1.36	ubiquitin associated domain containing 2 [Source:MGI Symbol;Acc:MGI:1916139]
Nsg1	7.76	7.41	-3.15	0.00275	0.0243	-0.412	-1.33	neuron specific gene family member 1 [Source:MGI Symbol;Acc:MGI:109149]
Ttyh3	7.51	7.17	-3.15	0.00275	0.0243	-0.527	-1.44	tweety homolog 3 (Drosophila) [Source:MGI Symbol;Acc:MGI:1925589]
Csmd1	5.7	6.14	3.15	0.00276	0.0244	0.496	1.41	CUB and Sushi multiple domains 1 [Source:MGI Symbol;Acc:MGI:2137383]
Rala	6.03	6.28	3.15	0.00276	0.0244	0.426	1.34	v-ral simian leukemia viral oncogene homolog A (ras related) [Source:MGI Symbol;Acc:MGI:1927243]
Zc3h7a	5.9	6.16	3.14	0.00277	0.0245	0.363	1.29	zinc finger CCCH type containing 7 A [Source:MGI Symbol;Acc:MGI:2445044]
Pds5b	6.86	7.29	3.15	0.00277	0.0245	0.479	1.39	PDS5, regulator of cohesion maintenance, homolog B (S. cerevisiae) [Source:MGI Symbol;Acc:MGI:2140945]
Cggbp1	6.39	6.93	3.15	0.00277	0.0245	0.758	1.69	CGG triplet repeat binding protein 1 [Source:MGI Symbol;Acc:MGI:2146370]
Ndst4	4.14	5.23	3.14	0.00278	0.0245	1.15	2.21	N-deacetylase/N-sulfotransferase (heparin glucosaminyl) 4 [Source:MGI Symbol;Acc:MGI:1932545]
Ttpa	2.05	2.62	3.14	0.00278	0.0245	0.74	1.67	tocopherol (alpha) transfer protein [Source:MGI Symbol;Acc:MGI:1354168]
Ap2a1	8.26	7.98	-3.14	0.00279	0.0246	-0.439	-1.36	adaptor-related protein complex 2, alpha 1 subunit [Source:MGI Symbol;Acc:MGI:101921]
[truncated: 1,390 more rows]

## Sheet: HTM_High
Symbol	HTM.Basal_3h.avg	HTM.High_3h.avg	HTM_High_3h.t	HTM_High_3h.p	HTM_High_3h.FDR	HTM_High_3h.logFC	HTM_High_3h.FC	Description
Ttll3	5.51	4.72	-6.22	9.31e-08	0.00164	-0.945	-1.93	tubulin tyrosine ligase-like family, member 3 [Source:MGI Symbol;Acc:MGI:2141418]
Ager	0.973	-2	-5.77	4.75e-07	0.00419	-3.12	-8.72	advanced glycosylation end product-specific receptor [Source:MGI Symbol;Acc:MGI:893592]
Insig1	6.05	6.75	5.58	9.19e-07	0.0054	0.693	1.62	insulin induced gene 1 [Source:MGI Symbol;Acc:MGI:1916289]
Angptl4	3.75	2.66	-5.42	1.62e-06	0.00715	-1.16	-2.23	angiopoietin-like 4 [Source:MGI Symbol;Acc:MGI:1888999]
Aimp2	2.65	1.56	-5.13	4.52e-06	0.0126	-1.33	-2.51	aminoacyl tRNA synthetase complex-interacting multifunctional protein 2 [Source:MGI Symbol;Acc:MGI:2385237]
Ushbp1	2.11	0.973	-5.05	6.01e-06	0.0126	-1.18	-2.27	Usher syndrome 1C binding protein 1 [Source:MGI Symbol;Acc:MGI:1922920]
Tnks	5.53	7.09	5.04	6.26e-06	0.0126	1.4	2.63	tankyrase, TRF1-interacting ankyrin-related ADP-ribose polymerase [Source:MGI Symbol;Acc:MGI:1341087]
Atn1	6.44	5.9	-5.04	6.33e-06	0.0126	-0.701	-1.63	atrophin 1 [Source:MGI Symbol;Acc:MGI:104725]
Zfp800	3.21	4.24	5.03	6.44e-06	0.0126	1.19	2.28	zinc finger protein 800 [Source:MGI Symbol;Acc:MGI:1889334]
Kctd18	4.22	4.79	4.97	7.96e-06	0.0128	0.671	1.59	potassium channel tetramerisation domain containing 18 [Source:MGI Symbol;Acc:MGI:3603813]
Cited1	4.57	3.26	-4.97	7.97e-06	0.0128	-1.27	-2.4	Cbp/p300-interacting transactivator with Glu/Asp-rich carboxy-terminal domain 1 [Source:MGI Symbol;Acc:MGI:108023]
Ttll7	7.29	8.08	4.85	1.2e-05	0.0169	0.872	1.83	tubulin tyrosine ligase-like family, member 7 [Source:MGI Symbol;Acc:MGI:1918142]
Npvf	2.9	0.674	-4.84	1.25e-05	0.0169	-2.19	-4.57	neuropeptide VF precursor [Source:MGI Symbol;Acc:MGI:1926488]
Ppargc1a	5.95	6.57	4.82	1.36e-05	0.017	0.735	1.66	peroxisome proliferative activated receptor, gamma, coactivator 1 alpha [Source:MGI Symbol;Acc:MGI:1342774]
Arrdc3	6.31	7.09	4.79	1.48e-05	0.017	0.843	1.79	arrestin domain containing 3 [Source:MGI Symbol;Acc:MGI:2145242]
Plat	5.94	5.41	-4.77	1.59e-05	0.017	-0.632	-1.55	plasminogen activator, tissue [Source:MGI Symbol;Acc:MGI:97610]
Safb2	7.09	6.45	-4.75	1.72e-05	0.017	-0.614	-1.53	scaffold attachment factor B2 [Source:MGI Symbol;Acc:MGI:2146808]
Acin1	7.28	6.84	-4.74	1.74e-05	0.017	-0.482	-1.4	apoptotic chromatin condensation inducer 1 [Source:MGI Symbol;Acc:MGI:1891824]
Gpr17	5.48	4.9	-4.7	2.01e-05	0.0177	-0.697	-1.62	G protein-coupled receptor 17 [Source:MGI Symbol;Acc:MGI:3584514]
Senp5	4.35	5.27	4.7	2.02e-05	0.0177	0.862	1.82	SUMO/sentrin specific peptidase 5 [Source:MGI Symbol;Acc:MGI:2443596]
Atp8a2	4.28	5.36	4.66	2.32e-05	0.0177	1.07	2.1	ATPase, aminophospholipid transporter-like, class I, type 8A, member 2 [Source:MGI Symbol;Acc:MGI:1354710]
Igsf9	4.18	3.56	-4.66	2.35e-05	0.0177	-0.725	-1.65	immunoglobulin superfamily, member 9 [Source:MGI Symbol;Acc:MGI:2135283]
Fmn1	2.44	3.45	4.65	2.36e-05	0.0177	1.01	2.01	formin 1 [Source:MGI Symbol;Acc:MGI:101815]
Axin2	4.82	4.23	-4.65	2.41e-05	0.0177	-0.662	-1.58	axin2 [Source:MGI Symbol;Acc:MGI:1270862]
Oraov1	3.52	2.76	-4.63	2.57e-05	0.0181	-0.894	-1.86	oral cancer overexpressed 1 [Source:MGI Symbol;Acc:MGI:1919534]
Srrm4os	1.32	3.12	4.56	3.26e-05	0.0215	2	4	serine/arginine repetitive matrix 4, opposite strand [Source:MGI Symbol;Acc:MGI:1924048]
Lpgat1	7.3	8.06	4.55	3.32e-05	0.0215	0.697	1.62	lysophosphatidylglycerol acyltransferase 1 [Source:MGI Symbol;Acc:MGI:2446186]
Zfp943	4.24	5.02	4.54	3.49e-05	0.0215	0.855	1.81	zinc finger prtoein 943 [Source:MGI Symbol;Acc:MGI:1921920]
Zfp101	2.52	3.38	4.53	3.53e-05	0.0215	0.807	1.75	zinc finger protein 101 [Source:MGI Symbol;Acc:MGI:107547]
Dennd1b	4.35	4.98	4.5	4.02e-05	0.023	0.741	1.67	DENN/MADD domain containing 1B [Source:MGI Symbol;Acc:MGI:2447812]
Kcna2	8.07	8.62	4.49	4.04e-05	0.023	0.63	1.55	potassium voltage-gated channel, shaker-related subfamily, member 2 [Source:MGI Symbol;Acc:MGI:96659]
Lztfl1	5.6	6.16	4.47	4.35e-05	0.0235	0.671	1.59	leucine zipper transcription factor-like 1 [Source:MGI Symbol;Acc:MGI:1934860]
Tmem28	4.37	3.68	-4.46	4.58e-05	0.0235	-0.784	-1.72	transmembrane protein 28 [Source:MGI Symbol;Acc:MGI:3648377]
Crat	4.9	4.34	-4.46	4.6e-05	0.0235	-0.741	-1.67	carnitine acetyltransferase [Source:MGI Symbol;Acc:MGI:109501]
Uhmk1	8.52	9.17	4.42	5.22e-05	0.0235	0.628	1.55	U2AF homology motif (UHM) kinase 1 [Source:MGI Symbol;Acc:MGI:1341908]
Lnp	5.12	6.09	4.41	5.4e-05	0.0235	1	2.01	limb and neural patterns [Source:MGI Symbol;Acc:MGI:1918115]
Zfhx4	5.72	6.71	4.4	5.47e-05	0.0235	1.03	2.04	zinc finger homeodomain 4 [Source:MGI Symbol;Acc:MGI:2137668]
Zfp397	5.03	5.72	4.38	5.88e-05	0.0235	0.795	1.74	zinc finger protein 397 [Source:MGI Symbol;Acc:MGI:1916506]
Dbn1	7.19	6.73	-4.37	6.09e-05	0.0235	-0.544	-1.46	drebrin 1 [Source:MGI Symbol;Acc:MGI:1931838]
Scn1a	7.1	7.97	4.37	6.18e-05	0.0235	0.89	1.85	sodium channel, voltage-gated, type I, alpha [Source:MGI Symbol;Acc:MGI:98246]
Gm15777	-0.421	1.88	4.36	6.24e-05	0.0235	2.32	4.98	predicted gene 15777 [Source:MGI Symbol;Acc:MGI:3783219]
Xpo4	2.89	4.22	4.33	7.04e-05	0.0235	1.23	2.35	exportin 4 [Source:MGI Symbol;Acc:MGI:1888526]
Malat1	9.23	10.2	4.33	7.09e-05	0.0235	1.6	3.02	metastasis associated lung adenocarcinoma transcript 1 (non-coding RNA) [Source:MGI Symbol;Acc:MGI:1919539]
Gk5	1.67	2.62	4.32	7.13e-05	0.0235	1.03	2.04	glycerol kinase 5 (putative) [Source:MGI Symbol;Acc:MGI:2443336]
Megf6	5.17	4.56	-4.32	7.15e-05	0.0235	-0.831	-1.78	multiple EGF-like-domains 6 [Source:MGI Symbol;Acc:MGI:1919351]
Stx2	5.38	4.97	-4.32	7.3e-05	0.0235	-0.498	-1.41	syntaxin 2 [Source:MGI Symbol;Acc:MGI:108059]
Myo5a	8.2	8.78	4.31	7.46e-05	0.0235	0.58	1.49	myosin VA [Source:MGI Symbol;Acc:MGI:105976]
Fam45a	5.22	5.8	4.31	7.52e-05	0.0235	0.595	1.51	family with sequence similarity 45, member A [Source:MGI Symbol;Acc:MGI:1915144]
Sesn3	4.03	5.72	4.31	7.53e-05	0.0235	1.64	3.11	sestrin 3 [Source:MGI Symbol;Acc:MGI:1922997]
Cc2d1b	5.32	4.88	-4.31	7.53e-05	0.0235	-0.551	-1.46	coiled-coil and C2 domain containing 1B [Source:MGI Symbol;Acc:MGI:2443076]
Plcxd3	2.66	4.42	4.3	7.67e-05	0.0235	1.98	3.94	phosphatidylinositol-specific phospholipase C, X domain containing 3 [Source:MGI Symbol;Acc:MGI:2442605]
Tyk2	4.62	4.04	-4.3	7.67e-05	0.0235	-0.746	-1.68	tyrosine kinase 2 [Source:MGI Symbol;Acc:MGI:1929470]
Plekhg4	2.98	2.39	-4.3	7.74e-05	0.0235	-0.925	-1.9	pleckstrin homology domain containing, family G (with RhoGef domain) member 4 [Source:MGI Symbol;Acc:MGI:2142544]
Dnajb14	7.11	7.69	4.29	7.86e-05	0.0235	0.587	1.5	DnaJ (Hsp40) homolog, subfamily B, member 14 [Source:MGI Symbol;Acc:MGI:1917854]
Radil	4.47	4.02	-4.29	7.91e-05	0.0235	-0.702	-1.63	Ras association and DIL domains [Source:MGI Symbol;Acc:MGI:2443088]
Notch4	4.42	3.7	-4.29	7.96e-05	0.0235	-0.842	-1.79	notch 4 [Source:MGI Symbol;Acc:MGI:107471]
Rhobtb3	5.3	5.93	4.29	7.98e-05	0.0235	0.712	1.64	Rho-related BTB domain containing 3 [Source:MGI Symbol;Acc:MGI:1920546]
Gtf2a1	5.25	5.98	4.28	8.23e-05	0.0235	0.671	1.59	general transcription factor II A, 1 [Source:MGI Symbol;Acc:MGI:1933277]
Bicd1	5.72	6.47	4.28	8.28e-05	0.0235	0.877	1.84	bicaudal D homolog 1 (Drosophila) [Source:MGI Symbol;Acc:MGI:1101760]
Dennd5b	5.96	6.95	4.27	8.61e-05	0.0235	1.03	2.05	DENN/MADD domain containing 5B [Source:MGI Symbol;Acc:MGI:2444273]
Dcaf17	3.68	4.42	4.27	8.62e-05	0.0235	0.765	1.7	DDB1 and CUL4 associated factor 17 [Source:MGI Symbol;Acc:MGI:1923013]
Ttc37	4.17	4.99	4.27	8.65e-05	0.0235	0.709	1.64	tetratricopeptide repeat domain 37 [Source:MGI Symbol;Acc:MGI:2679923]
Gm42770	1.64	3.91	4.26	8.73e-05	0.0235	2.27	4.83	predicted gene 42770 [Source:MGI Symbol;Acc:MGI:5662907]
Sh2b1	4.9	4.21	-4.26	8.81e-05	0.0235	-0.748	-1.68	SH2B adaptor protein 1 [Source:MGI Symbol;Acc:MGI:1201407]
Calcoco1	5.9	5.44	-4.26	8.87e-05	0.0235	-0.496	-1.41	calcium binding and coiled coil domain 1 [Source:MGI Symbol;Acc:MGI:1914738]
Ptbp1	4.98	4.51	-4.26	8.91e-05	0.0235	-0.616	-1.53	polypyrimidine tract binding protein 1 [Source:MGI Symbol;Acc:MGI:97791]
Zbtb10	3.75	4.52	4.25	9.18e-05	0.0235	0.744	1.68	zinc finger and BTB domain containing 10 [Source:MGI Symbol;Acc:MGI:2139883]
Pggt1b	2.14	3.34	4.24	9.35e-05	0.0235	1.13	2.18	protein geranylgeranyltransferase type I, beta subunit [Source:MGI Symbol;Acc:MGI:1917514]
Nrde2	4.22	3.6	-4.24	9.38e-05	0.0235	-0.807	-1.75	nrde-2 necessary for RNA interference, domain containing [Source:MGI Symbol;Acc:MGI:2670969]
Zfp169	3.56	4.43	4.24	9.43e-05	0.0235	0.947	1.93	zinc finger protein 169 [Source:MGI Symbol;Acc:MGI:1915161]
Irf2bp1	5.12	4.46	-4.22	9.93e-05	0.0235	-0.805	-1.75	interferon regulatory factor 2 binding protein 1 [Source:MGI Symbol;Acc:MGI:2442159]
Zfp799	4.52	5.13	4.22	0.000102	0.0235	0.644	1.56	zinc finger protein 799 [Source:MGI Symbol;Acc:MGI:2443934]
Hmgcr	7.17	7.73	4.21	0.000103	0.0235	0.544	1.46	3-hydroxy-3-methylglutaryl-Coenzyme A reductase [Source:MGI Symbol;Acc:MGI:96159]
Pik3ca	6.77	7.15	4.21	0.000104	0.0235	0.483	1.4	phosphatidylinositol 3-kinase, catalytic, alpha polypeptide [Source:MGI Symbol;Acc:MGI:1206581]
Pak4	6.21	5.81	-4.21	0.000104	0.0235	-0.442	-1.36	p21 protein (Cdc42/Rac)-activated kinase 4 [Source:MGI Symbol;Acc:MGI:1917834]
Ncor2	7.77	7.24	-4.21	0.000106	0.0235	-0.593	-1.51	nuclear receptor co-repressor 2 [Source:MGI Symbol;Acc:MGI:1337080]
Cacnb4	5.72	6.56	4.2	0.000107	0.0235	0.868	1.83	calcium channel, voltage-dependent, beta 4 subunit [Source:MGI Symbol;Acc:MGI:103301]
Azin1	7.05	7.54	4.2	0.000108	0.0235	0.603	1.52	antizyme inhibitor 1 [Source:MGI Symbol;Acc:MGI:1859169]
Ltbp4	6.1	5.41	-4.2	0.000108	0.0235	-0.863	-1.82	latent transforming growth factor beta binding protein 4 [Source:MGI Symbol;Acc:MGI:1321395]
Psd3	7.38	8.27	4.2	0.000109	0.0235	0.859	1.81	pleckstrin and Sec7 domain containing 3 [Source:MGI Symbol;Acc:MGI:1918215]
Golga3	6.4	6.83	4.2	0.000109	0.0235	0.49	1.4	golgi autoantigen, golgin subfamily a, 3 [Source:MGI Symbol;Acc:MGI:96958]
6330410L21Rik	-1.71	-0.0385	4.19	0.00011	0.0235	2.47	5.53	RIKEN cDNA 6330410L21 gene [Source:MGI Symbol;Acc:MGI:2441710]
Stard4	4.87	5.45	4.19	0.000112	0.0235	0.581	1.5	StAR-related lipid transfer (START) domain containing 4 [Source:MGI Symbol;Acc:MGI:2156764]
Dicer1	6.38	7.09	4.18	0.000113	0.0235	0.633	1.55	dicer 1, ribonuclease type III [Source:MGI Symbol;Acc:MGI:2177178]
Wdr24	5.02	4.36	-4.18	0.000114	0.0235	-0.805	-1.75	WD repeat domain 24 [Source:MGI Symbol;Acc:MGI:2446285]
Sema4c	4.36	3.75	-4.18	0.000115	0.0235	-0.702	-1.63	sema domain, immunoglobulin domain (Ig), transmembrane domain (TM) and short cytoplasmic domain, (semaphorin) 4C [Source:MGI Symbol;Acc:MGI:109252]
Fam159a	0.833	-0.549	-4.18	0.000116	0.0235	-1.79	-3.46	family with sequence similarity 159, member A [Source:MGI Symbol;Acc:MGI:3651644]
Gm7694	2.69	1.87	-4.17	0.000119	0.0235	-0.942	-1.92	predicted gene 7694 [Source:MGI Symbol;Acc:MGI:3649135]
D3Ertd254e	5.07	5.64	4.17	0.00012	0.0235	0.638	1.56	DNA segment, Chr 3, ERATO Doi 254, expressed [Source:MGI Symbol;Acc:MGI:1098769]
Prr7	3.51	2.33	-4.16	0.000121	0.0235	-1.34	-2.53	proline rich 7 (synaptic) [Source:MGI Symbol;Acc:MGI:3487246]
Lrrcc1	5.41	5.97	4.16	0.000123	0.0235	0.732	1.66	leucine rich repeat and coiled-coil domain containing 1 [Source:MGI Symbol;Acc:MGI:1918960]
Mybl1	1.46	2.71	4.16	0.000123	0.0235	1.24	2.36	myeloblastosis oncogene-like 1 [Source:MGI Symbol;Acc:MGI:99925]
Cc2d1a	6.05	5.31	-4.16	0.000124	0.0235	-0.744	-1.68	coiled-coil and C2 domain containing 1A [Source:MGI Symbol;Acc:MGI:2384831]
Phf2	5.83	5.52	-4.14	0.000129	0.0236	-0.539	-1.45	PHD finger protein 2 [Source:MGI Symbol;Acc:MGI:1338034]
Lmbrd2	3.68	5.52	4.14	0.00013	0.0236	1.89	3.71	LMBR1 domain containing 2 [Source:MGI Symbol;Acc:MGI:2444173]
Fnip1	5.25	5.89	4.14	0.00013	0.0236	0.747	1.68	folliculin interacting protein 1 [Source:MGI Symbol;Acc:MGI:2444668]
Rftn1	5.28	4.73	-4.14	0.000131	0.0236	-0.716	-1.64	raftlin lipid raft linker 1 [Source:MGI Symbol;Acc:MGI:1923688]
Klhl24	5.54	6.35	4.13	0.000133	0.0236	0.735	1.66	kelch-like 24 [Source:MGI Symbol;Acc:MGI:1923035]
Scap	6.76	6.35	-4.13	0.000135	0.0236	-0.454	-1.37	SREBF chaperone [Source:MGI Symbol;Acc:MGI:2135958]
Rfx1	5.37	4.83	-4.13	0.000135	0.0236	-0.613	-1.53	regulatory factor X, 1 (influences HLA class II expression) [Source:MGI Symbol;Acc:MGI:105982]
Zfp26	3.92	5.04	4.13	0.000137	0.0236	1.03	2.04	zinc finger protein 26 [Source:MGI Symbol;Acc:MGI:99173]
Zfp300	1.43	2.53	4.12	0.000139	0.0236	1.11	2.16	zinc finger protein 300 [Source:MGI Symbol;Acc:MGI:3045326]
Ercc2	4.81	4.32	-4.12	0.000139	0.0236	-0.68	-1.6	excision repair cross-complementing rodent repair deficiency, complementation group 2 [Source:MGI Symbol;Acc:MGI:95413]
Frmpd4	5.37	6.02	4.12	0.00014	0.0236	0.676	1.6	FERM and PDZ domain containing 4 [Source:MGI Symbol;Acc:MGI:3042378]
Rab5a	6.5	6.99	4.12	0.000141	0.0236	0.545	1.46	RAB5A, member RAS oncogene family [Source:MGI Symbol;Acc:MGI:105926]
Ppm1k	6.4	6.94	4.11	0.000144	0.0236	0.58	1.49	protein phosphatase 1K (PP2C domain containing) [Source:MGI Symbol;Acc:MGI:2442111]
Cpeb3	6.98	7.59	4.11	0.000145	0.0236	0.543	1.46	cytoplasmic polyadenylation element binding protein 3 [Source:MGI Symbol;Acc:MGI:2443075]
Lgals4	2.09	0.906	-4.11	0.000145	0.0236	-1.2	-2.3	lectin, galactose binding, soluble 4 [Source:MGI Symbol;Acc:MGI:107536]
Zfr2	5.62	5.14	-4.11	0.000146	0.0236	-0.578	-1.49	zinc finger RNA binding protein 2 [Source:MGI Symbol;Acc:MGI:2143792]
Vps37c	4.27	3.69	-4.1	0.000148	0.0237	-0.66	-1.58	vacuolar protein sorting 37C (yeast) [Source:MGI Symbol;Acc:MGI:2147661]
Ubr3	7.47	8.22	4.09	0.000154	0.0244	0.695	1.62	ubiquitin protein ligase E3 component n-recognin 3 [Source:MGI Symbol;Acc:MGI:1861100]
Fam73a	7.33	7.96	4.08	0.000157	0.0244	0.626	1.54	family with sequence similarity 73, member A [Source:MGI Symbol;Acc:MGI:1924567]
Nelfcd	5.81	5.19	-4.08	0.000157	0.0244	-0.64	-1.56	negative elongation factor complex member C/D, Th1l [Source:MGI Symbol;Acc:MGI:1926424]
Msmo1	6.31	6.75	4.08	0.000158	0.0244	0.585	1.5	methylsterol monoxygenase 1 [Source:MGI Symbol;Acc:MGI:1913484]
Trip6	3.31	2.5	-4.08	0.00016	0.0246	-0.933	-1.91	thyroid hormone receptor interactor 6 [Source:MGI Symbol;Acc:MGI:1343458]
Rxra	6.34	5.84	-4.07	0.000165	0.0249	-0.587	-1.5	retinoid X receptor alpha [Source:MGI Symbol;Acc:MGI:98214]
Nr5a1os	-0.449	-2.32	-4.07	0.000165	0.0249	-2.12	-4.33	nuclear receptor subfamily 5, group A, member 1, opposite strand [Source:MGI Symbol;Acc:MGI:1918544]
Fam63b	6.5	7.27	4.06	0.000167	0.0249	0.804	1.75	family with sequence similarity 63, member B [Source:MGI Symbol;Acc:MGI:2443086]
Eefsec	3.47	2.84	-4.05	0.000172	0.0249	-0.722	-1.65	eukaryotic elongation factor, selenocysteine-tRNA-specific [Source:MGI Symbol;Acc:MGI:2137092]
Fam104a	4.1	3.62	-4.06	0.000172	0.0249	-0.592	-1.51	family with sequence similarity 104, member A [Source:MGI Symbol;Acc:MGI:106351]
Nup160	3.9	4.57	4.05	0.000173	0.0249	0.754	1.69	nucleoporin 160 [Source:MGI Symbol;Acc:MGI:1926227]
Zfp335	3.91	3.5	-4.05	0.000174	0.0249	-0.718	-1.64	zinc finger protein 335 [Source:MGI Symbol;Acc:MGI:2682313]
Ormdl3	6.22	5.59	-4.05	0.000176	0.0249	-0.676	-1.6	ORM1-like 3 (S. cerevisiae) [Source:MGI Symbol;Acc:MGI:1913862]
Kdm6b	5.77	5.44	-4.05	0.000177	0.0249	-0.517	-1.43	KDM1 lysine (K)-specific demethylase 6B [Source:MGI Symbol;Acc:MGI:2448492]
Gm42837	-3.02	-0.511	4.05	0.000177	0.0249	2.74	6.66	predicted gene 42837 [Source:MGI Symbol;Acc:MGI:5662974]
Phc3	6.11	6.94	4.04	0.000181	0.0253	0.799	1.74	polyhomeotic-like 3 (Drosophila) [Source:MGI Symbol;Acc:MGI:2181434]
Mecp2	7.42	8.11	4.04	0.000183	0.0253	0.699	1.62	methyl CpG binding protein 2 [Source:MGI Symbol;Acc:MGI:99918]
Gm37776	-2.7	0.52	4.03	0.000185	0.0254	3.5	11.3	predicted gene, 37776 [Source:MGI Symbol;Acc:MGI:5611004]
Rnasel	3.62	4.2	4.03	0.000186	0.0254	0.578	1.49	ribonuclease L (2', 5'-oligoisoadenylate synthetase-dependent) [Source:MGI Symbol;Acc:MGI:1098272]
Acd	4.63	4.04	-4.03	0.000189	0.0255	-0.642	-1.56	adrenocortical dysplasia [Source:MGI Symbol;Acc:MGI:87873]
Akap6	7.6	8.26	4.02	0.00019	0.0255	0.582	1.5	A kinase (PRKA) anchor protein 6 [Source:MGI Symbol;Acc:MGI:3050566]
Slf1	4.54	5.07	4.02	0.000191	0.0255	0.666	1.59	SMC5-SMC6 complex localization factor 1 [Source:MGI Symbol;Acc:MGI:2145448]
Noc4l	3.89	3.24	-4.02	0.000193	0.0255	-0.713	-1.64	nucleolar complex associated 4 homolog (S. cerevisiae) [Source:MGI Symbol;Acc:MGI:2140843]
Axin1	4.64	4.04	-4.02	0.000195	0.0255	-0.66	-1.58	axin 1 [Source:MGI Symbol;Acc:MGI:1096327]
Braf	6.68	7.43	4.01	0.000199	0.0255	0.694	1.62	Braf transforming gene [Source:MGI Symbol;Acc:MGI:88190]
Kdm5a	5.82	6.43	4.01	0.0002	0.0255	0.637	1.55	lysine (K)-specific demethylase 5A [Source:MGI Symbol;Acc:MGI:2136980]
AI593442	6.07	6.75	4.01	0.0002	0.0255	0.782	1.72	expressed sequence AI593442 [Source:MGI Symbol;Acc:MGI:2143099]
Rpn2	7.7	7.28	-4.01	0.0002	0.0255	-0.45	-1.37	ribophorin II [Source:MGI Symbol;Acc:MGI:98085]
Trim59	3.26	4.01	4.01	0.000202	0.0256	1.07	2.1	tripartite motif-containing 59 [Source:MGI Symbol;Acc:MGI:1914199]
Mllt6	7.41	7.04	-4	0.000205	0.0256	-0.439	-1.36	myeloid/lymphoid or mixed-lineage leukemia (trithorax homolog, Drosophila); translocated to, 6 [Source:MGI Symbol;Acc:MGI:1935145]
Atad2	2.33	3.16	4	0.000206	0.0256	1.07	2.1	ATPase family, AAA domain containing 2 [Source:MGI Symbol;Acc:MGI:1917722]
Crebrf	6.5	7.24	4	0.000207	0.0256	0.722	1.65	CREB3 regulatory factor [Source:MGI Symbol;Acc:MGI:1924378]
Cul9	7.04	6.64	-4	0.000208	0.0256	-0.479	-1.39	cullin 9 [Source:MGI Symbol;Acc:MGI:1925559]
Zyg11b	7.84	8.63	3.99	0.00021	0.0257	0.745	1.68	zyg-ll family member B, cell cycle regulator [Source:MGI Symbol;Acc:MGI:2685277]
Tet1	3.2	4.07	3.99	0.000212	0.0258	0.868	1.83	tet methylcytosine dioxygenase 1 [Source:MGI Symbol;Acc:MGI:1098693]
Tet2	5.4	6.12	3.98	0.000216	0.0261	0.666	1.59	tet methylcytosine dioxygenase 2 [Source:MGI Symbol;Acc:MGI:2443298]
AU041133	2.45	3.1	3.98	0.000221	0.0265	0.841	1.79	expressed sequence AU041133 [Source:MGI Symbol;Acc:MGI:2143755]
Osbpl7	4.82	4.16	-3.97	0.000224	0.0267	-0.611	-1.53	oxysterol binding protein-like 7 [Source:MGI Symbol;Acc:MGI:1918490]
Mesdc1	4.66	4.12	-3.97	0.000227	0.0268	-0.716	-1.64	mesoderm development candidate 1 [Source:MGI Symbol;Acc:MGI:1891420]
Lppr3	6.75	6.1	-3.97	0.00023	0.0268	-0.736	-1.67	lipid phosphate phosphatase-related protein type 3 [Source:MGI Symbol;Acc:MGI:2388640]
Zfp120	4.66	5.2	3.96	0.000231	0.0268	0.749	1.68	zinc finger protein 120 [Source:MGI Symbol;Acc:MGI:1345179]
Aff2	3.13	4.57	3.96	0.000232	0.0268	1.23	2.35	AF4/FMR2 family, member 2 [Source:MGI Symbol;Acc:MGI:1202294]
Dedd2	3.25	2.52	-3.96	0.000233	0.0268	-0.959	-1.94	death effector domain-containing DNA binding protein 2 [Source:MGI Symbol;Acc:MGI:1914629]
Rnpepl1	5.54	5.06	-3.96	0.000235	0.0268	-0.565	-1.48	arginyl aminopeptidase (aminopeptidase B)-like 1 [Source:MGI Symbol;Acc:MGI:1914170]
Ifi35	1.27	-0.363	-3.96	0.000236	0.0268	-1.77	-3.41	interferon-induced protein 35 [Source:MGI Symbol;Acc:MGI:1917360]
Klhl28	3.14	4.26	3.95	0.000242	0.0271	1.22	2.33	kelch-like 28 [Source:MGI Symbol;Acc:MGI:1913939]
Nbeal2	6.2	5.77	-3.95	0.000242	0.0271	-0.585	-1.5	neurobeachin-like 2 [Source:MGI Symbol;Acc:MGI:2448554]
Pelo	3.49	2.61	-3.95	0.000243	0.0271	-0.99	-1.99	pelota homolog (Drosophila) [Source:MGI Symbol;Acc:MGI:2145154]
Kif20b	-2.46	-0.115	3.94	0.000249	0.0275	2.74	6.69	kinesin family member 20B [Source:MGI Symbol;Acc:MGI:2444576]
Sertad3	1.77	0.73	-3.94	0.000249	0.0275	-1.11	-2.16	SERTA domain containing 3 [Source:MGI Symbol;Acc:MGI:2180697]
Trim46	6.47	5.97	-3.94	0.000252	0.0275	-0.523	-1.44	tripartite motif-containing 46 [Source:MGI Symbol;Acc:MGI:2673000]
Gm38190	1.71	3.37	3.93	0.000255	0.0275	1.81	3.5	predicted gene, 38190 [Source:MGI Symbol;Acc:MGI:5611418]
Supt5	7.44	6.94	-3.93	0.000257	0.0275	-0.575	-1.49	suppressor of Ty 5 [Source:MGI Symbol;Acc:MGI:1202400]
Hsd17b7	3.9	4.51	3.93	0.00026	0.0275	0.74	1.67	hydroxysteroid (17-beta) dehydrogenase 7 [Source:MGI Symbol;Acc:MGI:1330808]
Dennd4a	6.18	6.77	3.92	0.000261	0.0275	0.533	1.45	DENN/MADD domain containing 4A [Source:MGI Symbol;Acc:MGI:2142979]
Gca	3.21	3.79	3.92	0.000263	0.0275	0.564	1.48	grancalcin [Source:MGI Symbol;Acc:MGI:1918521]
Lrig2	6.07	6.62	3.92	0.000266	0.0275	0.519	1.43	leucine-rich repeats and immunoglobulin-like domains 2 [Source:MGI Symbol;Acc:MGI:2443718]
Ryr3	5.28	6.44	3.92	0.000267	0.0275	1.01	2.01	ryanodine receptor 3 [Source:MGI Symbol;Acc:MGI:99684]
Klhdc8b	5.44	4.72	-3.92	0.00027	0.0275	-0.762	-1.7	kelch domain containing 8B [Source:MGI Symbol;Acc:MGI:1925517]
Nrip2	5.6	5.11	-3.91	0.000272	0.0275	-0.557	-1.47	nuclear receptor interacting protein 2 [Source:MGI Symbol;Acc:MGI:1891884]
Pim2	4.75	4.3	-3.91	0.000274	0.0275	-0.525	-1.44	proviral integration site 2 [Source:MGI Symbol;Acc:MGI:97587]
Rfx7	5.17	5.83	3.91	0.000274	0.0275	0.694	1.62	regulatory factor X, 7 [Source:MGI Symbol;Acc:MGI:2442675]
Zkscan16	4.69	6.31	3.91	0.000275	0.0275	1.51	2.84	zinc finger with KRAB and SCAN domains 16 [Source:MGI Symbol;Acc:MGI:3510405]
Ddx39	4.02	3.28	-3.91	0.000275	0.0275	-0.74	-1.67	DEAD (Asp-Glu-Ala-Asp) box polypeptide 39 [Source:MGI Symbol;Acc:MGI:1915528]
A330015K06Rik	1.61	2.63	3.91	0.000276	0.0275	1.07	2.1	RIKEN cDNA A330015K06 gene [Source:MGI Symbol;Acc:MGI:2443553]
Mst1r	1.98	0.901	-3.91	0.000277	0.0275	-1.26	-2.4	macrophage stimulating 1 receptor (c-met-related tyrosine kinase) [Source:MGI Symbol;Acc:MGI:99614]
Srrm3	5.18	4.57	-3.91	0.000278	0.0275	-0.671	-1.59	serine/arginine repetitive matrix 3 [Source:MGI Symbol;Acc:MGI:1920309]
Smyd1	2.16	3.2	3.9	0.000281	0.0275	1.14	2.2	SET and MYND domain containing 1 [Source:MGI Symbol;Acc:MGI:104790]
Csde1	8.44	8.88	3.9	0.000284	0.0275	0.515	1.43	cold shock domain containing E1, RNA binding [Source:MGI Symbol;Acc:MGI:92356]
1700007K09Rik	-1.76	0.484	3.9	0.000286	0.0275	2.55	5.86	RIKEN cDNA 1700007K09 gene [Source:MGI Symbol;Acc:MGI:1916568]
Dcbld2	4.6	5.14	3.89	0.000288	0.0275	0.485	1.4	discoidin, CUB and LCCL domain containing 2 [Source:MGI Symbol;Acc:MGI:1920629]
Zfp398	3.36	4.24	3.89	0.000289	0.0275	0.801	1.74	zinc finger protein 398 [Source:MGI Symbol;Acc:MGI:1917856]
Lrfn4	4.79	3.87	-3.89	0.000292	0.0275	-1.03	-2.04	leucine rich repeat and fibronectin type III domain containing 4 [Source:MGI Symbol;Acc:MGI:2385612]
Ccnc	5.4	5.89	3.89	0.000296	0.0275	0.621	1.54	cyclin C [Source:MGI Symbol;Acc:MGI:1858199]
Tubb2b	5.49	4.79	-3.88	0.000301	0.0275	-0.784	-1.72	tubulin, beta 2B class IIB [Source:MGI Symbol;Acc:MGI:1920960]
Akap10	3.69	4.41	3.88	0.000304	0.0275	0.704	1.63	A kinase (PRKA) anchor protein 10 [Source:MGI Symbol;Acc:MGI:1890218]
Adcy6	7.21	6.81	-3.87	0.000308	0.0275	-0.553	-1.47	adenylate cyclase 6 [Source:MGI Symbol;Acc:MGI:87917]
Alkbh8	3.45	4.55	3.87	0.000309	0.0275	1.09	2.13	alkB, alkylation repair homolog 8 (E. coli) [Source:MGI Symbol;Acc:MGI:1914917]
Celf5	6.9	6.47	-3.87	0.000311	0.0275	-0.607	-1.52	CUGBP, Elav-like family member 5 [Source:MGI Symbol;Acc:MGI:2442333]
B3galt1	4.89	5.6	3.87	0.000311	0.0275	0.701	1.63	UDP-Gal:betaGlcNAc beta 1,3-galactosyltransferase, polypeptide 1 [Source:MGI Symbol;Acc:MGI:1349403]
Fam193b	6.75	6.12	-3.87	0.000311	0.0275	-0.638	-1.56	family with sequence similarity 193, member B [Source:MGI Symbol;Acc:MGI:2385851]
Spag9	8.71	9.41	3.87	0.000314	0.0275	0.666	1.59	sperm associated antigen 9 [Source:MGI Symbol;Acc:MGI:1918084]
Nrp1	6	6.41	3.87	0.000315	0.0275	0.49	1.4	neuropilin 1 [Source:MGI Symbol;Acc:MGI:106206]
Mkln1	7.48	8.01	3.86	0.000317	0.0275	0.548	1.46	muskelin 1, intracellular mediator containing kelch motifs [Source:MGI Symbol;Acc:MGI:1351638]
Tmem158	4.94	4.07	-3.86	0.00032	0.0275	-0.992	-1.99	transmembrane protein 158 [Source:MGI Symbol;Acc:MGI:1919559]
Zswim4	4.23	3.75	-3.86	0.00032	0.0275	-0.595	-1.51	zinc finger SWIM-type containing 4 [Source:MGI Symbol;Acc:MGI:2443726]
2810004N23Rik	3.6	3.04	-3.86	0.000321	0.0275	-0.65	-1.57	RIKEN cDNA 2810004N23 gene [Source:MGI Symbol;Acc:MGI:1913773]
Abca5	6.07	6.83	3.86	0.000322	0.0275	0.832	1.78	ATP-binding cassette, sub-family A (ABC1), member 5 [Source:MGI Symbol;Acc:MGI:2386607]
Mme	3.41	4.43	3.86	0.000323	0.0275	1.03	2.05	membrane metallo endopeptidase [Source:MGI Symbol;Acc:MGI:97004]
Orc4	5.39	6.16	3.86	0.000324	0.0275	0.828	1.77	origin recognition complex, subunit 4 [Source:MGI Symbol;Acc:MGI:1347043]
Spopl	3.67	4.33	3.86	0.000325	0.0275	0.784	1.72	speckle-type POZ protein-like [Source:MGI Symbol;Acc:MGI:1924107]
Utp14b	4.48	5.33	3.86	0.000326	0.0275	0.807	1.75	UTP14, U3 small nucleolar ribonucleoprotein, homolog B (yeast) [Source:MGI Symbol;Acc:MGI:2445092]
Gm42641	1.07	-0.0774	-3.85	0.000327	0.0275	-1.23	-2.35	predicted gene 42641 [Source:MGI Symbol;Acc:MGI:5662778]
Scn2a1	8.03	8.75	3.85	0.000327	0.0275	0.737	1.67	sodium channel, voltage-gated, type II, alpha 1 [Source:MGI Symbol;Acc:MGI:98248]
Gm43795	-1.94	0.00201	3.85	0.000327	0.0275	2.43	5.4	predicted gene 43795 [Source:MGI Symbol;Acc:MGI:5663932]
Traf1	2.65	1.82	-3.85	0.000327	0.0275	-0.944	-1.92	TNF receptor-associated factor 1 [Source:MGI Symbol;Acc:MGI:101836]
Sart3	5.79	5.35	-3.85	0.000328	0.0275	-0.489	-1.4	squamous cell carcinoma antigen recognized by T cells 3 [Source:MGI Symbol;Acc:MGI:1858230]
Bmp4	0.807	-0.615	-3.85	0.000329	0.0275	-1.55	-2.92	bone morphogenetic protein 4 [Source:MGI Symbol;Acc:MGI:88180]
Ogt	8.8	9.53	3.85	0.00033	0.0275	0.728	1.66	O-linked N-acetylglucosamine (GlcNAc) transferase (UDP-N-acetylglucosamine:polypeptide-N-acetylglucosaminyl transferase) [Source:MGI Symbol;Acc:MGI:1339639]
Kmt2c	7.06	7.73	3.85	0.000331	0.0275	0.659	1.58	lysine (K)-specific methyltransferase 2C [Source:MGI Symbol;Acc:MGI:2444959]
Gm38198	2.76	4.12	3.85	0.000331	0.0275	1.62	3.08	predicted gene, 38198 [Source:MGI Symbol;Acc:MGI:5611426]
Akt1s1	4.44	3.8	-3.85	0.000332	0.0275	-0.766	-1.7	AKT1 substrate 1 (proline-rich) [Source:MGI Symbol;Acc:MGI:1914855]
Ppip5k2	5.15	5.9	3.85	0.000333	0.0275	0.686	1.61	diphosphoinositol pentakisphosphate kinase 2 [Source:MGI Symbol;Acc:MGI:2142810]
Lrwd1	4.34	3.88	-3.85	0.000334	0.0275	-0.512	-1.43	leucine-rich repeats and WD repeat domain containing 1 [Source:MGI Symbol;Acc:MGI:1918985]
Tmem143	3.76	3.31	-3.85	0.000336	0.0275	-0.581	-1.5	transmembrane protein 143 [Source:MGI Symbol;Acc:MGI:1917459]
Lypla1	5.01	5.56	3.84	0.000339	0.0275	0.726	1.65	lysophospholipase 1 [Source:MGI Symbol;Acc:MGI:1344588]
Rexo1	5.24	4.81	-3.84	0.000341	0.0275	-0.6	-1.52	REX1, RNA exonuclease 1 homolog (S. cerevisiae) [Source:MGI Symbol;Acc:MGI:1914182]
Gramd1a	7.16	6.68	-3.84	0.000343	0.0275	-0.536	-1.45	GRAM domain containing 1A [Source:MGI Symbol;Acc:MGI:105490]
Gpi1	8.83	8.35	-3.83	0.000349	0.0275	-0.471	-1.39	glucose phosphate isomerase 1 [Source:MGI Symbol;Acc:MGI:95797]
Skil	5.95	6.49	3.83	0.000353	0.0275	0.685	1.61	SKI-like [Source:MGI Symbol;Acc:MGI:106203]
Ube4a	6.76	7.29	3.83	0.000353	0.0275	0.524	1.44	ubiquitination factor E4A [Source:MGI Symbol;Acc:MGI:2154580]
Mob1b	4.78	5.57	3.83	0.000353	0.0275	0.871	1.83	MOB kinase activator 1B [Source:MGI Symbol;Acc:MGI:1915723]
Vgf	8.48	7.91	-3.83	0.000354	0.0275	-0.654	-1.57	VGF nerve growth factor inducible [Source:MGI Symbol;Acc:MGI:1343180]
Trim2	8.61	9.03	3.83	0.000357	0.0275	0.526	1.44	tripartite motif-containing 2 [Source:MGI Symbol;Acc:MGI:1933163]
Rictor	5.72	6.59	3.83	0.000357	0.0275	0.848	1.8	RPTOR independent companion of MTOR, complex 2 [Source:MGI Symbol;Acc:MGI:1926007]
Rhno1	2.3	1.71	-3.83	0.000357	0.0275	-0.767	-1.7	RAD9-HUS1-RAD1 interacting nuclear orphan 1 [Source:MGI Symbol;Acc:MGI:1915315]
Pcsk4	3.5	2.63	-3.83	0.000358	0.0275	-0.947	-1.93	proprotein convertase subtilisin/kexin type 4 [Source:MGI Symbol;Acc:MGI:97514]
Xpo1	6.74	7.5	3.82	0.000359	0.0275	0.662	1.58	exportin 1, CRM1 homolog (yeast) [Source:MGI Symbol;Acc:MGI:2144013]
Uvssa	4.47	5.24	3.82	0.000359	0.0275	0.76	1.69	UV stimulated scaffold protein A [Source:MGI Symbol;Acc:MGI:1918351]
Gm43859	0.876	2.35	3.82	0.00036	0.0275	1.69	3.22	predicted gene 43859 [Source:MGI Symbol;Acc:MGI:5663996]
Scn3a	6.3	7.11	3.82	0.00036	0.0275	0.79	1.73	sodium channel, voltage-gated, type III, alpha [Source:MGI Symbol;Acc:MGI:98249]
Zfp777	4.27	3.54	-3.82	0.000362	0.0275	-0.656	-1.58	zinc finger protein 777 [Source:MGI Symbol;Acc:MGI:1919556]
Csad	5.21	4.73	-3.82	0.000366	0.0277	-0.549	-1.46	cysteine sulfinic acid decarboxylase [Source:MGI Symbol;Acc:MGI:2180098]
Prr12	6.48	5.99	-3.82	0.000368	0.0277	-0.56	-1.47	proline rich 12 [Source:MGI Symbol;Acc:MGI:2679002]
Gm42632	-2.7	0.211	3.82	0.000369	0.0277	2.52	5.75	predicted gene 42632 [Source:MGI Symbol;Acc:MGI:5662769]
Cpm	3.75	4.34	3.81	0.000371	0.0277	0.682	1.6	carboxypeptidase M [Source:MGI Symbol;Acc:MGI:1917824]
Sbno1	6.87	7.27	3.81	0.000374	0.0279	0.406	1.32	sno, strawberry notch homolog 1 (Drosophila) [Source:MGI Symbol;Acc:MGI:2384298]
Rpusd4	2.53	1.6	-3.81	0.000377	0.0279	-0.908	-1.88	RNA pseudouridylate synthase domain containing 4 [Source:MGI Symbol;Acc:MGI:1919239]
Qrfp	2.05	0.673	-3.81	0.00038	0.0279	-1.4	-2.63	pyroglutamylated RFamide peptide [Source:MGI Symbol;Acc:MGI:3630329]
Cdkl5	5.82	6.55	3.81	0.00038	0.0279	0.843	1.79	cyclin-dependent kinase-like 5 [Source:MGI Symbol;Acc:MGI:1278336]
Zdhhc18	5.08	4.53	-3.81	0.000381	0.0279	-0.658	-1.58	zinc finger, DHHC domain containing 18 [Source:MGI Symbol;Acc:MGI:3527792]
Thap3	4.06	3.39	-3.8	0.000384	0.0279	-0.657	-1.58	THAP domain containing, apoptosis associated protein 3 [Source:MGI Symbol;Acc:MGI:1917126]
Csf2ra	4.37	3.82	-3.8	0.000384	0.0279	-0.708	-1.63	colony stimulating factor 2 receptor, alpha, low-affinity (granulocyte-macrophage) [Source:MGI Symbol;Acc:MGI:1339754]
Ccdc30	3.93	3.48	-3.8	0.00039	0.0279	-0.545	-1.46	coiled-coil domain containing 30 [Source:MGI Symbol;Acc:MGI:1920582]
Lysmd3	3.33	4.29	3.8	0.000391	0.0279	1.02	2.03	LysM, putative peptidoglycan-binding, domain containing 3 [Source:MGI Symbol;Acc:MGI:1915906]
Rnf38	6.15	6.56	3.8	0.000393	0.0279	0.373	1.3	ring finger protein 38 [Source:MGI Symbol;Acc:MGI:1920719]
Tceal3	5.38	4.44	-3.8	0.000394	0.0279	-1.02	-2.02	transcription elongation factor A (SII)-like 3 [Source:MGI Symbol;Acc:MGI:1913354]
Grin2b	7.22	8.01	3.79	0.000395	0.0279	0.894	1.86	glutamate receptor, ionotropic, NMDA2B (epsilon 2) [Source:MGI Symbol;Acc:MGI:95821]
Ttc39b	6.06	6.77	3.79	0.000395	0.0279	0.636	1.55	tetratricopeptide repeat domain 39B [Source:MGI Symbol;Acc:MGI:1917113]
Tmub1	3.87	2.95	-3.79	0.0004	0.028	-0.966	-1.95	transmembrane and ubiquitin-like domain containing 1 [Source:MGI Symbol;Acc:MGI:1923764]
Fam98c	2.33	1.25	-3.79	0.000402	0.028	-1.26	-2.39	family with sequence similarity 98, member C [Source:MGI Symbol;Acc:MGI:1921083]
Banp	5.1	4.59	-3.79	0.000402	0.028	-0.572	-1.49	BTG3 associated nuclear protein [Source:MGI Symbol;Acc:MGI:1889023]
Haus6	3.52	4.15	3.79	0.000403	0.028	0.577	1.49	HAUS augmin-like complex, subunit 6 [Source:MGI Symbol;Acc:MGI:1923389]
Zfp763	4.19	4.79	3.79	0.000404	0.028	0.708	1.63	zinc finger protein 763 [Source:MGI Symbol;Acc:MGI:1920701]
Chd9	5.77	6.48	3.78	0.000409	0.028	0.582	1.5	chromodomain helicase DNA binding protein 9 [Source:MGI Symbol;Acc:MGI:1924001]
Sugp2	6.99	6.68	-3.78	0.00041	0.028	-0.4	-1.32	SURP and G patch domain containing 2 [Source:MGI Symbol;Acc:MGI:2678085]
Tbc1d15	5.35	5.9	3.78	0.000411	0.028	0.587	1.5	TBC1 domain family, member 15 [Source:MGI Symbol;Acc:MGI:1913937]
Spata24	1.76	0.91	-3.78	0.000413	0.028	-1.08	-2.11	spermatogenesis associated 24 [Source:MGI Symbol;Acc:MGI:1918492]
Kit	4.44	5.3	3.78	0.000414	0.028	0.753	1.69	kit oncogene [Source:MGI Symbol;Acc:MGI:96677]
Vldlr	6.63	7.07	3.78	0.000415	0.028	0.465	1.38	very low density lipoprotein receptor [Source:MGI Symbol;Acc:MGI:98935]
Fbxw23	1.94	1.08	-3.78	0.000419	0.028	-1.05	-2.07	F-box and WD-40 domain protein 23 [Source:MGI Symbol;Acc:MGI:3779686]
Fam110a	3.1	2.18	-3.78	0.000419	0.028	-0.965	-1.95	family with sequence similarity 110, member A [Source:MGI Symbol;Acc:MGI:1921097]
Klhl11	3.3	4.96	3.77	0.00042	0.028	1.81	3.51	kelch-like 11 [Source:MGI Symbol;Acc:MGI:2388648]
Pex14	4.52	4.05	-3.77	0.000421	0.028	-0.623	-1.54	peroxisomal biogenesis factor 14 [Source:MGI Symbol;Acc:MGI:1927868]
Ddx31	2.8	2.17	-3.77	0.000423	0.028	-0.733	-1.66	DEAD/H (Asp-Glu-Ala-Asp/His) box polypeptide 31 [Source:MGI Symbol;Acc:MGI:2682639]
Plcb3	4.05	3.52	-3.77	0.000425	0.028	-0.588	-1.5	phospholipase C, beta 3 [Source:MGI Symbol;Acc:MGI:104778]
Unc80	8.09	8.75	3.77	0.000426	0.028	0.65	1.57	unc-80 homolog (C. elegans) [Source:MGI Symbol;Acc:MGI:2652882]
Sgk3	5.31	6.02	3.77	0.00043	0.028	0.785	1.72	serum/glucocorticoid regulated kinase 3 [Source:MGI Symbol;Acc:MGI:2182368]
Fmr1	5.38	6.13	3.77	0.00043	0.028	0.845	1.8	fragile X mental retardation syndrome 1 [Source:MGI Symbol;Acc:MGI:95564]
Erbb4	5.71	6.57	3.77	0.000432	0.028	0.884	1.85	v-erb-a erythroblastic leukemia viral oncogene homolog 4 (avian) [Source:MGI Symbol;Acc:MGI:104771]
Usp24	6.68	7.37	3.77	0.000432	0.028	0.603	1.52	ubiquitin specific peptidase 24 [Source:MGI Symbol;Acc:MGI:1919936]
Gm36266	0.00506	-2	-3.77	0.000432	0.028	-1.97	-3.92	predicted gene, 36266 [Source:MGI Symbol;Acc:MGI:5595425]
N4bp2l2	5.15	5.81	3.76	0.000438	0.0282	0.715	1.64	NEDD4 binding protein 2-like 2 [Source:MGI Symbol;Acc:MGI:2687207]
Gm36936	0.477	2.44	3.76	0.00044	0.0282	1.86	3.64	predicted gene, 36936 [Source:MGI Symbol;Acc:MGI:5610164]
Abca1	5.77	6.49	3.76	0.000442	0.0282	0.639	1.56	ATP-binding cassette, sub-family A (ABC1), member 1 [Source:MGI Symbol;Acc:MGI:99607]
P3h3	5.51	5.03	-3.76	0.000442	0.0282	-0.561	-1.48	prolyl 3-hydroxylase 3 [Source:MGI Symbol;Acc:MGI:1315208]
6720427I07Rik	2.65	3.47	3.76	0.000444	0.0282	1.17	2.25	RIKEN cDNA 6720427I07 gene [Source:MGI Symbol;Acc:MGI:1924398]
Srprb	4.49	4.09	-3.76	0.000446	0.0283	-0.461	-1.38	signal recognition particle receptor, B subunit [Source:MGI Symbol;Acc:MGI:102964]
Gdap10	-1.6	1.29	3.75	0.000448	0.0283	2.57	5.93	ganglioside-induced differentiation-associated-protein 10 [Source:MGI Symbol;Acc:MGI:1338008]
Soat1	5.69	6.11	3.75	0.000454	0.0284	0.603	1.52	sterol O-acyltransferase 1 [Source:MGI Symbol;Acc:MGI:104665]
Ccng1	6.11	6.84	3.75	0.000456	0.0284	0.805	1.75	cyclin G1 [Source:MGI Symbol;Acc:MGI:102890]
Xrcc1	3.89	3.21	-3.75	0.000457	0.0284	-0.81	-1.75	X-ray repair complementing defective repair in Chinese hamster cells 1 [Source:MGI Symbol;Acc:MGI:99137]
Plxdc1	4.56	3.99	-3.75	0.000458	0.0284	-0.636	-1.55	plexin domain containing 1 [Source:MGI Symbol;Acc:MGI:1919574]
Slc1a2	10.5	11.2	3.75	0.000458	0.0284	0.708	1.63	solute carrier family 1 (glial high affinity glutamate transporter), member 2 [Source:MGI Symbol;Acc:MGI:101931]
Uprt	1.21	2.76	3.74	0.000461	0.0284	1.2	2.3	uracil phosphoribosyltransferase (FUR1) homolog (S. cerevisiae) [Source:MGI Symbol;Acc:MGI:2685620]
Gabrb2	5.06	6.51	3.74	0.000461	0.0284	1.24	2.36	gamma-aminobutyric acid (GABA) A receptor, subunit beta 2 [Source:MGI Symbol;Acc:MGI:95620]
Man2c1	6.84	6.47	-3.74	0.000463	0.0284	-0.454	-1.37	mannosidase, alpha, class 2C, member 1 [Source:MGI Symbol;Acc:MGI:1920994]
Kbtbd3	2.42	3.2	3.74	0.000464	0.0284	0.917	1.89	kelch repeat and BTB (POZ) domain containing 3 [Source:MGI Symbol;Acc:MGI:1916399]
Pank3	6.22	6.82	3.74	0.000466	0.0284	0.657	1.58	pantothenate kinase 3 [Source:MGI Symbol;Acc:MGI:2387464]
Pikfyve	5.75	6.44	3.74	0.00047	0.0286	0.677	1.6	phosphoinositide kinase, FYVE finger containing [Source:MGI Symbol;Acc:MGI:1335106]
Surf4	5.81	5.45	-3.74	0.000473	0.0286	-0.454	-1.37	surfeit gene 4 [Source:MGI Symbol;Acc:MGI:98445]
Tmem161a	5.29	4.76	-3.74	0.000474	0.0286	-0.568	-1.48	transmembrane protein 161A [Source:MGI Symbol;Acc:MGI:2384577]
Mdga2	5.41	5.88	3.73	0.000479	0.0288	0.66	1.58	MAM domain containing glycosylphosphatidylinositol anchor 2 [Source:MGI Symbol;Acc:MGI:2444706]
Ppp2r3a	5.99	6.52	3.73	0.000483	0.0289	0.53	1.44	protein phosphatase 2, regulatory subunit B'', alpha [Source:MGI Symbol;Acc:MGI:2442104]
Atxn3	5.16	5.65	3.73	0.000484	0.0289	0.612	1.53	ataxin 3 [Source:MGI Symbol;Acc:MGI:1099442]
Atp11b	6.79	7.41	3.73	0.000487	0.0289	0.575	1.49	ATPase, class VI, type 11B [Source:MGI Symbol;Acc:MGI:1923545]
Cdk7	5.67	6.23	3.73	0.000487	0.0289	0.519	1.43	cyclin-dependent kinase 7 [Source:MGI Symbol;Acc:MGI:102956]
Mybbp1a	6.34	6.03	-3.73	0.00049	0.029	-0.442	-1.36	MYB binding protein (P160) 1a [Source:MGI Symbol;Acc:MGI:106181]
NA	4.69	4.14	-3.72	0.000493	0.029	-0.572	-1.49	NA
Zfp81	4.19	4.86	3.72	0.000493	0.029	0.73	1.66	zinc finger protein 81 [Source:MGI Symbol;Acc:MGI:1890752]
Asxl2	4.36	5.15	3.72	0.000497	0.0291	0.642	1.56	additional sex combs like 2 (Drosophila) [Source:MGI Symbol;Acc:MGI:1922552]
Gm22009	1.79	2.96	3.72	0.000498	0.0291	2.18	4.54	predicted gene, 22009 [Source:MGI Symbol;Acc:MGI:5451786]
Zfp930	2.21	3.25	3.72	0.000501	0.0291	1.13	2.18	zinc finger protein 930 [Source:MGI Symbol;Acc:MGI:2675306]
Sf3a1	5.74	5.41	-3.72	0.000505	0.0293	-0.393	-1.31	splicing factor 3a, subunit 1 [Source:MGI Symbol;Acc:MGI:1914715]
Gm38299	1.96	2.67	3.71	0.000513	0.0293	0.924	1.9	predicted gene, 38299 [Source:MGI Symbol;Acc:MGI:5611527]
Ralgapa2	4.7	5.3	3.71	0.000514	0.0293	0.558	1.47	Ral GTPase activating protein, alpha subunit 2 (catalytic) [Source:MGI Symbol;Acc:MGI:3036245]
Gps2	3.33	2.58	-3.71	0.000514	0.0293	-0.775	-1.71	G protein pathway suppressor 2 [Source:MGI Symbol;Acc:MGI:1891751]
Ric3	6.75	7.19	3.71	0.000515	0.0293	0.438	1.35	resistance to inhibitors of cholinesterase 3 homolog (C. elegans) [Source:MGI Symbol;Acc:MGI:2443887]
Atp13a1	6.37	5.92	-3.71	0.000517	0.0293	-0.525	-1.44	ATPase type 13A1 [Source:MGI Symbol;Acc:MGI:2180801]
Pfkl	7.1	6.37	-3.71	0.000517	0.0293	-0.804	-1.75	phosphofructokinase, liver, B-type [Source:MGI Symbol;Acc:MGI:97547]
Gm10558	-1.19	0.424	3.71	0.000518	0.0293	2.7	6.51	predicted gene 10558 [Source:MGI Symbol;Acc:MGI:3642906]
Ces1d	1.87	0.318	-3.71	0.00052	0.0293	-1.6	-3.03	carboxylesterase 1D [Source:MGI Symbol;Acc:MGI:2148202]
Sptbn4	7.58	7.06	-3.71	0.000521	0.0293	-0.635	-1.55	spectrin beta, non-erythrocytic 4 [Source:MGI Symbol;Acc:MGI:1890574]
Pcdh9	6.75	7.35	3.7	0.000523	0.0293	0.593	1.51	protocadherin 9 [Source:MGI Symbol;Acc:MGI:1306801]
Zfp266	5.39	6.15	3.7	0.000523	0.0293	0.708	1.63	zinc finger protein 266 [Source:MGI Symbol;Acc:MGI:1924769]
Pcgf2	4.64	4.14	-3.7	0.000527	0.0293	-0.58	-1.49	polycomb group ring finger 2 [Source:MGI Symbol;Acc:MGI:99161]
Gm26613	-0.0842	-2.09	-3.7	0.000527	0.0293	-2.13	-4.37	predicted gene, 26613 [Source:MGI Symbol;Acc:MGI:5477107]
Hdac5	7.16	6.59	-3.7	0.000537	0.0297	-0.602	-1.52	histone deacetylase 5 [Source:MGI Symbol;Acc:MGI:1333784]
Cdh19	3.82	4.5	3.69	0.000538	0.0297	0.639	1.56	cadherin 19, type 2 [Source:MGI Symbol;Acc:MGI:3588198]
Prpf40b	6.36	5.89	-3.69	0.000539	0.0297	-0.509	-1.42	PRP40 pre-mRNA processing factor 40 homolog B (yeast) [Source:MGI Symbol;Acc:MGI:1925583]
Ccser2	6.15	6.69	3.69	0.000544	0.0298	0.517	1.43	coiled-coil serine rich 2 [Source:MGI Symbol;Acc:MGI:101859]
Cpd	6.11	6.64	3.69	0.000545	0.0298	0.488	1.4	carboxypeptidase D [Source:MGI Symbol;Acc:MGI:107265]
Fbxl19	5.96	5.47	-3.69	0.000546	0.0298	-0.582	-1.5	F-box and leucine-rich repeat protein 19 [Source:MGI Symbol;Acc:MGI:3039600]
Gm3604	-0.893	0.67	3.69	0.000549	0.0299	2.38	5.21	predicted gene 3604 [Source:MGI Symbol;Acc:MGI:3781781]
Ruvbl2	3.81	3.04	-3.69	0.00055	0.0299	-0.974	-1.96	RuvB-like protein 2 [Source:MGI Symbol;Acc:MGI:1342299]
Tmod2	8.41	9.06	3.69	0.000554	0.0299	0.581	1.5	tropomodulin 2 [Source:MGI Symbol;Acc:MGI:1355335]
Adck5	4.57	4.07	-3.69	0.000555	0.0299	-0.653	-1.57	aarF domain containing kinase 5 [Source:MGI Symbol;Acc:MGI:2679274]
Clstn2	6.16	6.75	3.68	0.000558	0.03	0.521	1.44	calsyntenin 2 [Source:MGI Symbol;Acc:MGI:1929897]
Begain	5.8	5.27	-3.68	0.000559	0.03	-0.469	-1.38	brain-enriched guanylate kinase-associated [Source:MGI Symbol;Acc:MGI:3044626]
Fam129b	4.45	3.68	-3.68	0.000567	0.0302	-0.826	-1.77	family with sequence similarity 129, member B [Source:MGI Symbol;Acc:MGI:2442910]
Tcp11l1	4.64	5.44	3.68	0.000569	0.0302	0.835	1.78	t-complex 11 like 1 [Source:MGI Symbol;Acc:MGI:2444263]
Fryl	6.4	6.95	3.68	0.00057	0.0302	0.547	1.46	furry homolog-like (Drosophila) [Source:MGI Symbol;Acc:MGI:1919563]
Gm15616	-0.967	1.26	3.68	0.000572	0.0302	2.19	4.58	predicted gene 15616 [Source:MGI Symbol;Acc:MGI:3783061]
Wwp1	5.31	5.99	3.67	0.000573	0.0302	0.699	1.62	WW domain containing E3 ubiquitin protein ligase 1 [Source:MGI Symbol;Acc:MGI:1861728]
Clasrp	6.14	5.47	-3.67	0.000574	0.0302	-0.663	-1.58	CLK4-associating serine/arginine rich protein [Source:MGI Symbol;Acc:MGI:1855695]
Fam199x	4.74	5.56	3.67	0.000577	0.0302	0.94	1.92	family with sequence similarity 199, X-linked [Source:MGI Symbol;Acc:MGI:2384304]
Aqp4	5.95	6.6	3.67	0.000579	0.0302	0.644	1.56	aquaporin 4 [Source:MGI Symbol;Acc:MGI:107387]
Rasal2	5.52	6.37	3.67	0.00058	0.0302	0.8	1.74	RAS protein activator like 2 [Source:MGI Symbol;Acc:MGI:2443881]
Slc44a2	5.56	5.33	-3.67	0.000583	0.0302	-0.381	-1.3	solute carrier family 44, member 2 [Source:MGI Symbol;Acc:MGI:1915932]
Gm4491	0.583	1.61	3.67	0.000584	0.0302	1.21	2.31	predicted gene 4491 [Source:MGI Symbol;Acc:MGI:3782676]
Gga1	5.75	5.28	-3.67	0.000586	0.0302	-0.619	-1.54	golgi associated, gamma adaptin ear containing, ARF binding protein 1 [Source:MGI Symbol;Acc:MGI:2146207]
Cdh12	2.29	3.31	3.66	0.000593	0.0302	1.05	2.07	cadherin 12 [Source:MGI Symbol;Acc:MGI:109503]
Dpysl4	5.87	5.41	-3.66	0.000597	0.0302	-0.5	-1.41	dihydropyrimidinase-like 4 [Source:MGI Symbol;Acc:MGI:1349764]
Nsd1	7.04	7.63	3.66	0.000598	0.0302	0.528	1.44	nuclear receptor-binding SET-domain protein 1 [Source:MGI Symbol;Acc:MGI:1276545]
Lrrc58	7.03	8	3.66	0.000601	0.0302	0.93	1.91	leucine rich repeat containing 58 [Source:MGI Symbol;Acc:MGI:2443542]
E2f7	-1.86	0.142	3.66	0.000605	0.0302	2.53	5.77	E2F transcription factor 7 [Source:MGI Symbol;Acc:MGI:1289147]
Myo5b	2.95	4.27	3.66	0.000606	0.0302	1.34	2.53	myosin VB [Source:MGI Symbol;Acc:MGI:106598]
Stk32c	6.59	5.97	-3.66	0.000607	0.0302	-0.604	-1.52	serine/threonine kinase 32C [Source:MGI Symbol;Acc:MGI:2385336]
Srpk2	7.48	7.87	3.66	0.000608	0.0302	0.4	1.32	serine/arginine-rich protein specific kinase 2 [Source:MGI Symbol;Acc:MGI:1201408]
Llgl1	6.04	5.6	-3.66	0.000608	0.0302	-0.496	-1.41	lethal giant larvae homolog 1 (Drosophila) [Source:MGI Symbol;Acc:MGI:102682]
Mir5125	4.7	4.03	-3.66	0.000608	0.0302	-0.864	-1.82	microRNA 5125 [Source:MGI Symbol;Acc:MGI:4950450]
Tulp4	7	7.64	3.66	0.000609	0.0302	0.556	1.47	tubby like protein 4 [Source:MGI Symbol;Acc:MGI:1916092]
Asb6	4.23	3.65	-3.65	0.00061	0.0302	-0.694	-1.62	ankyrin repeat and SOCS box-containing 6 [Source:MGI Symbol;Acc:MGI:1919573]
Purb	8.56	9.24	3.65	0.000611	0.0302	0.729	1.66	purine rich element binding protein B [Source:MGI Symbol;Acc:MGI:1338779]
Vps26a	5.65	6.13	3.65	0.000611	0.0302	0.574	1.49	vacuolar protein sorting 26 homolog A (yeast) [Source:MGI Symbol;Acc:MGI:1353654]
Ank3	8.8	9.13	3.65	0.000612	0.0302	0.411	1.33	ankyrin 3, epithelial [Source:MGI Symbol;Acc:MGI:88026]
Manea	5.12	5.98	3.65	0.000612	0.0302	0.79	1.73	mannosidase, endo-alpha [Source:MGI Symbol;Acc:MGI:2444484]
Kcnn2	4.68	5.11	3.65	0.000613	0.0302	0.488	1.4	potassium intermediate/small conductance calcium-activated channel, subfamily N, member 2 [Source:MGI Symbol;Acc:MGI:2153182]
Aoc3	0.351	-1.16	-3.65	0.000615	0.0302	-1.6	-3.04	amine oxidase, copper containing 3 [Source:MGI Symbol;Acc:MGI:1306797]
Zfp846	4.03	4.65	3.65	0.000618	0.0303	0.674	1.6	zinc finger protein 846 [Source:MGI Symbol;Acc:MGI:1924012]
Umps	3.77	3.44	-3.65	0.000623	0.0304	-0.445	-1.36	uridine monophosphate synthetase [Source:MGI Symbol;Acc:MGI:1298388]
8430408G22Rik	1.8	0.349	-3.65	0.000624	0.0304	-1.66	-3.15	RIKEN cDNA 8430408G22 gene [Source:MGI Symbol;Acc:MGI:1918730]
Tmem132e	4.88	4.43	-3.64	0.000634	0.0308	-0.635	-1.55	transmembrane protein 132E [Source:MGI Symbol;Acc:MGI:2685490]
Zfp60	5.91	6.39	3.64	0.000635	0.0308	0.522	1.44	zinc finger protein 60 [Source:MGI Symbol;Acc:MGI:99207]
Gm37850	-0.738	0.886	3.64	0.000642	0.0309	2.05	4.15	predicted gene, 37850 [Source:MGI Symbol;Acc:MGI:5611078]
Zfp874b	3.66	4.22	3.64	0.000643	0.0309	0.677	1.6	zinc finger protein 874b [Source:MGI Symbol;Acc:MGI:3040702]
Mib1	7.08	7.82	3.64	0.000647	0.0309	0.711	1.64	mindbomb homolog 1 (Drosophila) [Source:MGI Symbol;Acc:MGI:2443157]
Cxadr	4.92	5.5	3.63	0.000648	0.0309	0.501	1.42	coxsackie virus and adenovirus receptor [Source:MGI Symbol;Acc:MGI:1201679]
Hspg2	4.02	3.26	-3.63	0.00065	0.0309	-0.974	-1.96	perlecan (heparan sulfate proteoglycan 2) [Source:MGI Symbol;Acc:MGI:96257]
Gm5124	2.36	0.986	-3.63	0.000651	0.0309	-1.32	-2.49	predicted pseudogene 5124 [Source:MGI Symbol;Acc:MGI:3643622]
Rapgef6	5.62	6.25	3.63	0.000653	0.0309	0.616	1.53	Rap guanine nucleotide exchange factor (GEF) 6 [Source:MGI Symbol;Acc:MGI:2384761]
Dock4	6.03	6.86	3.63	0.000654	0.0309	0.745	1.68	dedicator of cytokinesis 4 [Source:MGI Symbol;Acc:MGI:1918006]
Ranbp3	6.66	6.15	-3.63	0.000657	0.0309	-0.486	-1.4	RAN binding protein 3 [Source:MGI Symbol;Acc:MGI:1919060]
Nkd1	2.88	2.16	-3.63	0.000657	0.0309	-0.692	-1.62	naked cuticle 1 homolog (Drosophila) [Source:MGI Symbol;Acc:MGI:2135954]
Gm4969	-2.07	-0.428	3.63	0.000657	0.0309	1.96	3.89	predicted gene 4969 [Source:MGI Symbol;Acc:MGI:3647482]
Psmg3	2.52	1.24	-3.63	0.000663	0.0309	-1.14	-2.21	proteasome (prosome, macropain) assembly chaperone 3 [Source:MGI Symbol;Acc:MGI:1913756]
A830010M20Rik	5.51	5.96	3.63	0.000664	0.0309	0.485	1.4	RIKEN cDNA A830010M20 gene [Source:MGI Symbol;Acc:MGI:2445097]
Eea1	5.89	6.57	3.63	0.000665	0.0309	0.722	1.65	early endosome antigen 1 [Source:MGI Symbol;Acc:MGI:2442192]
Hif1a	6.4	7.04	3.63	0.000665	0.0309	0.59	1.51	hypoxia inducible factor 1, alpha subunit [Source:MGI Symbol;Acc:MGI:106918]
Ptdss2	5.66	5.25	-3.63	0.000665	0.0309	-0.495	-1.41	phosphatidylserine synthase 2 [Source:MGI Symbol;Acc:MGI:1351664]
Ttbk2	6.5	7.24	3.62	0.000672	0.0309	0.702	1.63	tau tubulin kinase 2 [Source:MGI Symbol;Acc:MGI:2155779]
Pbrm1	5.86	6.44	3.62	0.000673	0.0309	0.67	1.59	polybromo 1 [Source:MGI Symbol;Acc:MGI:1923998]
Hecw2	4.84	5.37	3.62	0.000673	0.0309	0.512	1.43	HECT, C2 and WW domain containing E3 ubiquitin protein ligase 2 [Source:MGI Symbol;Acc:MGI:2685817]
Gm42937	-0.689	-2.22	-3.62	0.000675	0.0309	-2.03	-4.08	predicted gene 42937 [Source:MGI Symbol;Acc:MGI:5663074]
Cdh8	5.58	6.16	3.62	0.000675	0.0309	0.605	1.52	cadherin 8 [Source:MGI Symbol;Acc:MGI:107434]
Gpsm1	6.42	5.96	-3.62	0.000676	0.0309	-0.514	-1.43	G-protein signalling modulator 1 (AGS3-like, C. elegans) [Source:MGI Symbol;Acc:MGI:1915089]
1700020I14Rik	6.49	7.29	3.62	0.000682	0.0309	0.895	1.86	RIKEN cDNA 1700020I14 gene [Source:MGI Symbol;Acc:MGI:1913852]
Zfand4	3.34	3.93	3.62	0.000683	0.0309	0.664	1.58	zinc finger, AN1-type domain 4 [Source:MGI Symbol;Acc:MGI:1914742]
Tmem110	5.15	4.78	-3.62	0.000684	0.0309	-0.417	-1.34	transmembrane protein 110 [Source:MGI Symbol;Acc:MGI:1921500]
Ptov1	8.22	7.68	-3.62	0.000685	0.0309	-0.547	-1.46	prostate tumor over expressed gene 1 [Source:MGI Symbol;Acc:MGI:1933946]
Pcdhb22	3.75	4.37	3.62	0.000685	0.0309	0.605	1.52	protocadherin beta 22 [Source:MGI Symbol;Acc:MGI:2136760]
Snd1	6.49	5.96	-3.62	0.000686	0.0309	-0.567	-1.48	staphylococcal nuclease and tudor domain containing 1 [Source:MGI Symbol;Acc:MGI:1929266]
Zfp433	-1.86	-0.0659	3.62	0.000688	0.0309	2.13	4.37	zinc finger protein 433 [Source:MGI Symbol;Acc:MGI:1920860]
Ifit1bl1	1.49	2.23	3.61	0.000691	0.0309	0.816	1.76	interferon induced protein with tetratricpeptide repeats 1B like 1 [Source:MGI Symbol;Acc:MGI:3650685]
Zmiz2	7.15	6.69	-3.61	0.0007	0.0312	-0.51	-1.42	zinc finger, MIZ-type containing 2 [Source:MGI Symbol;Acc:MGI:106374]
Galnt13	5.48	6.22	3.61	0.000707	0.0312	0.737	1.67	UDP-N-acetyl-alpha-D-galactosamine:polypeptide N-acetylgalactosaminyltransferase 13 [Source:MGI Symbol;Acc:MGI:2139447]
Trmu	4.56	4.04	-3.61	0.000707	0.0312	-0.633	-1.55	tRNA 5-methylaminomethyl-2-thiouridylate methyltransferase [Source:MGI Symbol;Acc:MGI:1919276]
Mum1	6.11	5.82	-3.6	0.00071	0.0312	-0.386	-1.31	melanoma associated antigen (mutated) 1 [Source:MGI Symbol;Acc:MGI:1915364]
Phf6	5.1	5.77	3.6	0.000712	0.0312	0.708	1.63	PHD finger protein 6 [Source:MGI Symbol;Acc:MGI:1918248]
D630036G22Rik	-1.92	0.291	3.6	0.000712	0.0312	2.59	6.03	RIKEN cDNA D630036G22 gene [Source:MGI Symbol;Acc:MGI:3045265]
Unk	4.86	4.56	-3.6	0.000712	0.0312	-0.529	-1.44	unkempt homolog (Drosophila) [Source:MGI Symbol;Acc:MGI:2442456]
Ap1g1	6.78	7.4	3.6	0.000713	0.0312	0.544	1.46	adaptor protein complex AP-1, gamma 1 subunit [Source:MGI Symbol;Acc:MGI:101919]
Scrib	6.22	5.86	-3.6	0.000713	0.0312	-0.511	-1.42	scribbled homolog (Drosophila) [Source:MGI Symbol;Acc:MGI:2145950]
Fam208a	5.95	6.59	3.6	0.00072	0.0314	0.676	1.6	family with sequence similarity 208, member A [Source:MGI Symbol;Acc:MGI:1921694]
Eif5a2	6.35	7.01	3.6	0.000725	0.0314	0.663	1.58	eukaryotic translation initiation factor 5A2 [Source:MGI Symbol;Acc:MGI:1933735]
1700125G02Rik	-0.3	0.889	3.6	0.000729	0.0314	1.49	2.81	RIKEN cDNA 1700125G02 gene [Source:MGI Symbol;Acc:MGI:1920878]
Ccdc43	4.35	4.96	3.6	0.000729	0.0314	0.766	1.7	coiled-coil domain containing 43 [Source:MGI Symbol;Acc:MGI:1289318]
Itpkc	3.96	3.48	-3.6	0.00073	0.0314	-0.581	-1.5	inositol 1,4,5-trisphosphate 3-kinase C [Source:MGI Symbol;Acc:MGI:2442554]
Gas2l1	5.35	4.87	-3.6	0.00073	0.0314	-0.548	-1.46	growth arrest-specific 2 like 1 [Source:MGI Symbol;Acc:MGI:1926176]
Mid2	6.01	6.63	3.6	0.000731	0.0314	0.589	1.5	midline 2 [Source:MGI Symbol;Acc:MGI:1344333]
U2af2	6.61	6.04	-3.59	0.000733	0.0314	-0.659	-1.58	U2 small nuclear ribonucleoprotein auxiliary factor (U2AF) 2 [Source:MGI Symbol;Acc:MGI:98886]
Lhx3	-0.0511	-1.56	-3.59	0.000737	0.0314	-2.11	-4.32	LIM homeobox protein 3 [Source:MGI Symbol;Acc:MGI:102673]
Mapk9	8.34	8.76	3.59	0.000739	0.0314	0.346	1.27	mitogen-activated protein kinase 9 [Source:MGI Symbol;Acc:MGI:1346862]
Usp31	6.26	6.75	3.59	0.000744	0.0314	0.539	1.45	ubiquitin specific peptidase 31 [Source:MGI Symbol;Acc:MGI:1923429]
1700037H04Rik	5.34	4.74	-3.59	0.000747	0.0314	-0.653	-1.57	RIKEN cDNA 1700037H04 gene [Source:MGI Symbol;Acc:MGI:1914576]
Cadm2	6.6	7.25	3.59	0.000747	0.0314	0.692	1.62	cell adhesion molecule 2 [Source:MGI Symbol;Acc:MGI:2442722]
Aldh6a1	6.79	7.43	3.59	0.000748	0.0314	0.64	1.56	aldehyde dehydrogenase family 6, subfamily A1 [Source:MGI Symbol;Acc:MGI:1915077]
Cep135	3.94	4.54	3.59	0.000749	0.0314	0.598	1.51	centrosomal protein 135 [Source:MGI Symbol;Acc:MGI:2681869]
Ergic3	6.99	6.36	-3.59	0.000749	0.0314	-0.661	-1.58	ERGIC and golgi 3 [Source:MGI Symbol;Acc:MGI:1913616]
Tinagl1	2.74	1.49	-3.59	0.000749	0.0314	-1.37	-2.58	tubulointerstitial nephritis antigen-like 1 [Source:MGI Symbol;Acc:MGI:2137617]
H13	6.55	6.19	-3.59	0.000751	0.0314	-0.433	-1.35	histocompatibility 13 [Source:MGI Symbol;Acc:MGI:95886]
Mir1898	-0.716	1.11	3.59	0.000755	0.0315	2.1	4.29	microRNA 1898 [Source:MGI Symbol;Acc:MGI:3811421]
Fancm	3.89	4.44	3.58	0.000761	0.0316	0.602	1.52	Fanconi anemia, complementation group M [Source:MGI Symbol;Acc:MGI:2442306]
Tmbim6	8.9	8.55	-3.58	0.000762	0.0316	-0.369	-1.29	transmembrane BAX inhibitor motif containing 6 [Source:MGI Symbol;Acc:MGI:99682]
Gm42484	-1.69	0.292	3.58	0.000762	0.0316	2.66	6.33	predicted gene 42484 [Source:MGI Symbol;Acc:MGI:5662621]
Zfp651	5.44	4.89	-3.58	0.000764	0.0316	-0.589	-1.5	zinc finger protein 651 [Source:MGI Symbol;Acc:MGI:2670992]
Dgke	7.03	7.46	3.58	0.000772	0.0319	0.386	1.31	diacylglycerol kinase, epsilon [Source:MGI Symbol;Acc:MGI:1889276]
Phrf1	5.89	5.46	-3.57	0.000778	0.032	-0.485	-1.4	PHD and ring finger domains 1 [Source:MGI Symbol;Acc:MGI:2141847]
Lrrc45	6.4	5.76	-3.57	0.000781	0.032	-0.68	-1.6	leucine rich repeat containing 45 [Source:MGI Symbol;Acc:MGI:2387183]
Nav3	4.49	5.22	3.57	0.000781	0.032	0.728	1.66	neuron navigator 3 [Source:MGI Symbol;Acc:MGI:2183703]
Gm2065	-0.6	1.12	3.57	0.000782	0.032	1.34	2.53	predicted gene 2065 [Source:MGI Symbol;Acc:MGI:3780232]
Chd6	7.11	7.75	3.57	0.000787	0.0321	0.555	1.47	chromodomain helicase DNA binding protein 6 [Source:MGI Symbol;Acc:MGI:1918639]
BC002059	1.19	2	3.57	0.000788	0.0321	1.3	2.46	cDNA sequence BC002059 [Source:MGI Symbol;Acc:MGI:2384864]
4930551O13Rik	-0.372	1.02	3.57	0.000792	0.0322	1.7	3.25	RIKEN cDNA 4930551O13 gene [Source:MGI Symbol;Acc:MGI:1922513]
Osbpl8	6.13	7.12	3.57	0.000796	0.0323	0.907	1.88	oxysterol binding protein-like 8 [Source:MGI Symbol;Acc:MGI:2443807]
Col2a1	3.08	2.41	-3.57	0.000798	0.0323	-0.808	-1.75	collagen, type II, alpha 1 [Source:MGI Symbol;Acc:MGI:88452]
Spry4	4.62	4.18	-3.57	0.000801	0.0323	-0.476	-1.39	sprouty homolog 4 (Drosophila) [Source:MGI Symbol;Acc:MGI:1345144]
Traf4	3.6	3.13	-3.56	0.000803	0.0323	-0.595	-1.51	TNF receptor associated factor 4 [Source:MGI Symbol;Acc:MGI:1202880]
4930480K15Rik	1.44	2.55	3.56	0.000808	0.0324	1.59	3.01	RIKEN cDNA 4930480K15 gene [Source:MGI Symbol;Acc:MGI:1926050]
Ptger1	3.77	3.22	-3.56	0.000814	0.0324	-0.617	-1.53	prostaglandin E receptor 1 (subtype EP1) [Source:MGI Symbol;Acc:MGI:97793]
Sema6c	3.93	3.34	-3.56	0.000815	0.0324	-0.63	-1.55	sema domain, transmembrane domain (TM), and cytoplasmic domain, (semaphorin) 6C [Source:MGI Symbol;Acc:MGI:1338032]
Dock6	5.57	5.01	-3.56	0.000817	0.0324	-0.659	-1.58	dedicator of cytokinesis 6 [Source:MGI Symbol;Acc:MGI:1914789]
Abcb7	5.47	6.02	3.56	0.000819	0.0324	0.626	1.54	ATP-binding cassette, sub-family B (MDR/TAP), member 7 [Source:MGI Symbol;Acc:MGI:109533]
Bap1	6.54	6.19	-3.56	0.000819	0.0324	-0.374	-1.3	Brca1 associated protein 1 [Source:MGI Symbol;Acc:MGI:1206586]
Map1b	10.3	10.9	3.56	0.00082	0.0324	0.53	1.44	microtubule-associated protein 1B [Source:MGI Symbol;Acc:MGI:1306778]
Fam135a	5.16	5.84	3.56	0.00082	0.0324	0.717	1.64	family with sequence similarity 135, member A [Source:MGI Symbol;Acc:MGI:1915437]
Rabgap1l	6.82	7.32	3.56	0.000822	0.0324	0.55	1.46	RAB GTPase activating protein 1-like [Source:MGI Symbol;Acc:MGI:1352507]
Trpm7	5.51	6.27	3.56	0.000826	0.0325	0.663	1.58	transient receptor potential cation channel, subfamily M, member 7 [Source:MGI Symbol;Acc:MGI:1929996]
Eif1ax	7.22	7.66	3.55	0.000835	0.0328	0.475	1.39	eukaryotic translation initiation factor 1A, X-linked [Source:MGI Symbol;Acc:MGI:1913485]
Timm44	5.94	5.56	-3.55	0.000838	0.0328	-0.4	-1.32	translocase of inner mitochondrial membrane 44 [Source:MGI Symbol;Acc:MGI:1343262]
Cbl	2.72	4.82	3.55	0.000841	0.0329	1.87	3.64	Casitas B-lineage lymphoma [Source:MGI Symbol;Acc:MGI:88279]
Rbm12	4.25	4.68	3.55	0.000844	0.0329	0.562	1.48	RNA binding motif protein 12 [Source:MGI Symbol;Acc:MGI:1922960]
Csrnp3	6.82	7.43	3.55	0.000851	0.033	0.573	1.49	cysteine-serine-rich nuclear protein 3 [Source:MGI Symbol;Acc:MGI:1925021]
Klhl15	4.04	5.02	3.54	0.000854	0.033	0.847	1.8	kelch-like 15 [Source:MGI Symbol;Acc:MGI:1923400]
Cd44	2.24	3.41	3.54	0.000854	0.033	1.15	2.22	CD44 antigen [Source:MGI Symbol;Acc:MGI:88338]
Ipo11	5.44	5.94	3.54	0.000856	0.033	0.578	1.49	importin 11 [Source:MGI Symbol;Acc:MGI:2442377]
Alox8	1.72	2.77	3.54	0.000857	0.033	1.11	2.16	arachidonate 8-lipoxygenase [Source:MGI Symbol;Acc:MGI:1098228]
Sirt7	5.11	4.55	-3.54	0.000858	0.033	-0.628	-1.55	sirtuin 7 [Source:MGI Symbol;Acc:MGI:2385849]
Zfp654	4.17	4.85	3.54	0.000864	0.0331	0.769	1.7	zinc finger protein 654 [Source:MGI Symbol;Acc:MGI:1919270]
Rce1	3.61	2.86	-3.54	0.000865	0.0331	-0.923	-1.9	RCE1 homolog, prenyl protein peptidase (S. cerevisiae) [Source:MGI Symbol;Acc:MGI:1336895]
2210016L21Rik	5.86	5.2	-3.54	0.000871	0.0333	-0.693	-1.62	RIKEN cDNA 2210016L21 gene [Source:MGI Symbol;Acc:MGI:1919607]
Nle1	3.14	2.65	-3.54	0.000873	0.0333	-0.631	-1.55	notchless homolog 1 (Drosophila) [Source:MGI Symbol;Acc:MGI:2429770]
A230056P14Rik	4.21	4.96	3.54	0.000875	0.0333	0.659	1.58	RIKEN cDNA A230056P14 gene [Source:MGI Symbol;Acc:MGI:2444856]
Ptprd	7.39	7.82	3.53	0.000885	0.0335	0.608	1.52	protein tyrosine phosphatase, receptor type, D [Source:MGI Symbol;Acc:MGI:97812]
Zbtb26	3.26	4.01	3.53	0.000885	0.0335	0.822	1.77	zinc finger and BTB domain containing 26 [Source:MGI Symbol;Acc:MGI:2444402]
Robo2	5.02	5.75	3.53	0.000886	0.0335	0.737	1.67	roundabout homolog 2 (Drosophila) [Source:MGI Symbol;Acc:MGI:1890110]
Lzts3	6.66	6.26	-3.53	0.000892	0.0336	-0.507	-1.42	leucine zipper, putative tumor suppressor family member 3 [Source:MGI Symbol;Acc:MGI:2656976]
Col19a1	1.67	3.13	3.53	0.000896	0.0336	1.34	2.54	collagen, type XIX, alpha 1 [Source:MGI Symbol;Acc:MGI:1095415]
Bdp1	4.91	5.57	3.53	0.000896	0.0336	0.727	1.66	B double prime 1, subunit of RNA polymerase III transcription initiation factor IIIB [Source:MGI Symbol;Acc:MGI:1347077]
Ephb2	4.57	4.01	-3.53	0.000897	0.0336	-0.705	-1.63	Eph receptor B2 [Source:MGI Symbol;Acc:MGI:99611]
Ncam2	4.09	5.13	3.53	0.000902	0.0337	1.1	2.14	neural cell adhesion molecule 2 [Source:MGI Symbol;Acc:MGI:97282]
Rbms3	6.42	7.07	3.53	0.000905	0.0337	0.743	1.67	RNA binding motif, single stranded interacting protein [Source:MGI Symbol;Acc:MGI:2444477]
Prune2	7.7	8.32	3.53	0.000905	0.0337	0.65	1.57	prune homolog 2 (Drosophila) [Source:MGI Symbol;Acc:MGI:1925004]
Smc5	4.5	5.07	3.52	0.000908	0.0337	0.574	1.49	structural maintenance of chromosomes 5 [Source:MGI Symbol;Acc:MGI:2385088]
Zfp280c	5.11	5.78	3.52	0.00091	0.0337	0.656	1.58	zinc finger protein 280C [Source:MGI Symbol;Acc:MGI:2387585]
1700124L16Rik	0.96	-0.609	-3.52	0.00091	0.0337	-1.48	-2.79	RIKEN cDNA 1700124L16 gene [Source:MGI Symbol;Acc:MGI:1915184]
Hmcn2	4.69	3.81	-3.52	0.000914	0.0337	-1.03	-2.05	hemicentin 2 [Source:MGI Symbol;Acc:MGI:2677838]
Eif2b2	4.69	4.05	-3.52	0.000915	0.0337	-0.673	-1.59	eukaryotic translation initiation factor 2B, subunit 2 beta [Source:MGI Symbol;Acc:MGI:2145118]
Dmwd	6.27	5.75	-3.52	0.000915	0.0337	-0.579	-1.49	dystrophia myotonica-containing WD repeat motif [Source:MGI Symbol;Acc:MGI:94907]
Oxsm	3.9	4.35	3.52	0.000916	0.0337	0.536	1.45	3-oxoacyl-ACP synthase, mitochondrial [Source:MGI Symbol;Acc:MGI:1918397]
Kat2b	4.41	5.05	3.52	0.000924	0.0337	0.58	1.5	K(lysine) acetyltransferase 2B [Source:MGI Symbol;Acc:MGI:1343094]
Unc119b	5.23	4.94	-3.52	0.000928	0.0337	-0.396	-1.32	unc-119 homolog B (C. elegans) [Source:MGI Symbol;Acc:MGI:2147162]
Tdp2	4.1	4.48	3.52	0.000929	0.0337	0.602	1.52	tyrosyl-DNA phosphodiesterase 2 [Source:MGI Symbol;Acc:MGI:1860486]
Bnip3	6.04	6.49	3.52	0.000929	0.0337	0.573	1.49	BCL2/adenovirus E1B interacting protein 3 [Source:MGI Symbol;Acc:MGI:109326]
Med13	6.25	6.92	3.52	0.000931	0.0337	0.728	1.66	mediator complex subunit 13 [Source:MGI Symbol;Acc:MGI:3029632]
Gdpd3	0.476	-0.745	-3.52	0.000932	0.0337	-1.31	-2.48	glycerophosphodiester phosphodiesterase domain containing 3 [Source:MGI Symbol;Acc:MGI:1915866]
Setd2	6.18	6.75	3.51	0.000934	0.0337	0.593	1.51	SET domain containing 2 [Source:MGI Symbol;Acc:MGI:1918177]
Pik3r3	5.66	6.06	3.51	0.000934	0.0337	0.408	1.33	phosphatidylinositol 3 kinase, regulatory subunit, polypeptide 3 (p55) [Source:MGI Symbol;Acc:MGI:109277]
Eri3	6.24	5.86	-3.51	0.00094	0.0338	-0.486	-1.4	exoribonuclease 3 [Source:MGI Symbol;Acc:MGI:2153887]
Hectd1	6.61	7.17	3.51	0.000945	0.0338	0.478	1.39	HECT domain containing 1 [Source:MGI Symbol;Acc:MGI:2384768]
Wnk2	7.2	6.84	-3.51	0.000945	0.0338	-0.473	-1.39	WNK lysine deficient protein kinase 2 [Source:MGI Symbol;Acc:MGI:1922857]
Trh	5.76	4.61	-3.51	0.000946	0.0338	-1.39	-2.62	thyrotropin releasing hormone [Source:MGI Symbol;Acc:MGI:98823]
Zfp518a	3.83	4.58	3.51	0.000947	0.0338	0.777	1.71	zinc finger protein 518A [Source:MGI Symbol;Acc:MGI:1919922]
AI314180	7.06	7.52	3.51	0.000948	0.0338	0.461	1.38	expressed sequence AI314180 [Source:MGI Symbol;Acc:MGI:2140220]
U2af1l4	4	3.32	-3.51	0.00095	0.0338	-0.651	-1.57	U2 small nuclear RNA auxiliary factor 1-like 4 [Source:MGI Symbol;Acc:MGI:2678374]
5430427N15Rik	-1.54	0.00412	3.51	0.000957	0.0339	2.15	4.44	RIKEN cDNA 5430427N15 gene [Source:MGI Symbol;Acc:MGI:2441699]
Samd14	6.38	5.7	-3.51	0.000958	0.0339	-0.75	-1.68	sterile alpha motif domain containing 14 [Source:MGI Symbol;Acc:MGI:2384945]
Hmcn1	2.04	2.74	3.51	0.000961	0.0339	0.903	1.87	hemicentin 1 [Source:MGI Symbol;Acc:MGI:2685047]
Mlycd	4.02	3.19	-3.5	0.000963	0.0339	-0.794	-1.73	malonyl-CoA decarboxylase [Source:MGI Symbol;Acc:MGI:1928485]
Srrt	7.08	6.7	-3.5	0.000966	0.0339	-0.404	-1.32	serrate RNA effector molecule homolog (Arabidopsis) [Source:MGI Symbol;Acc:MGI:1933527]
Zfp445	4.71	5.83	3.5	0.000968	0.0339	0.93	1.91	zinc finger protein 445 [Source:MGI Symbol;Acc:MGI:2143340]
Map3k2	5.61	6.24	3.5	0.00097	0.0339	0.728	1.66	mitogen-activated protein kinase kinase kinase 2 [Source:MGI Symbol;Acc:MGI:1346873]
Lmtk3	8.03	7.52	-3.5	0.000972	0.0339	-0.599	-1.51	lemur tyrosine kinase 3 [Source:MGI Symbol;Acc:MGI:3039582]
Rnf166	3.87	3.19	-3.5	0.000976	0.0339	-0.776	-1.71	ring finger protein 166 [Source:MGI Symbol;Acc:MGI:1915968]
Card9	2.05	1.08	-3.5	0.000977	0.0339	-0.896	-1.86	caspase recruitment domain family, member 9 [Source:MGI Symbol;Acc:MGI:2685628]
Csnk1a1	8.36	8.77	3.5	0.000977	0.0339	0.468	1.38	casein kinase 1, alpha 1 [Source:MGI Symbol;Acc:MGI:1934950]
Kifc3	6.13	5.7	-3.5	0.000978	0.0339	-0.488	-1.4	kinesin family member C3 [Source:MGI Symbol;Acc:MGI:109202]
Tbce	6.17	6.52	3.5	0.000978	0.0339	0.395	1.32	tubulin-specific chaperone E [Source:MGI Symbol;Acc:MGI:1917680]
Mesdc2	6.22	5.81	-3.5	0.000981	0.0339	-0.501	-1.42	mesoderm development candidate 2 [Source:MGI Symbol;Acc:MGI:1891421]
Baz2b	5.8	6.4	3.5	0.000983	0.0339	0.631	1.55	bromodomain adjacent to zinc finger domain, 2B [Source:MGI Symbol;Acc:MGI:2442782]
Mettl5	2.54	3.32	3.5	0.000983	0.0339	0.701	1.63	methyltransferase like 5 [Source:MGI Symbol;Acc:MGI:1922672]
Arl5b	4.59	5.34	3.5	0.000986	0.0339	0.737	1.67	ADP-ribosylation factor-like 5B [Source:MGI Symbol;Acc:MGI:1923119]
Drc1	4.4	3.83	-3.5	0.000986	0.0339	-0.672	-1.59	dynein regulatory complex subunit 1 [Source:MGI Symbol;Acc:MGI:2685906]
Dffb	3.84	3.25	-3.49	0.000995	0.0341	-0.731	-1.66	DNA fragmentation factor, beta subunit [Source:MGI Symbol;Acc:MGI:1196287]
Gtpbp6	3.39	2.6	-3.49	0.001	0.0342	-0.998	-2	GTP binding protein 6 (putative) [Source:MGI Symbol;Acc:MGI:1306825]
Dda1	5.9	5.42	-3.49	0.001	0.0342	-0.569	-1.48	DET1 and DDB1 associated 1 [Source:MGI Symbol;Acc:MGI:1913748]
Usp21	5.39	4.96	-3.49	0.001	0.0342	-0.425	-1.34	ubiquitin specific peptidase 21 [Source:MGI Symbol;Acc:MGI:1353665]
Khnyn	4.94	4.53	-3.49	0.00101	0.0342	-0.533	-1.45	KH and NYN domain containing [Source:MGI Symbol;Acc:MGI:2451333]
Man1a2	6.57	7.34	3.49	0.00101	0.0342	0.735	1.66	mannosidase, alpha, class 1A, member 2 [Source:MGI Symbol;Acc:MGI:104676]
Gm16740	0.508	1.37	3.49	0.00101	0.0343	1.47	2.77	predicted gene, 16740 [Source:MGI Symbol;Acc:MGI:4439664]
Gck	4.51	3.73	-3.48	0.00102	0.0346	-0.951	-1.93	glucokinase [Source:MGI Symbol;Acc:MGI:1270854]
Gtpbp3	4.87	4.35	-3.48	0.00102	0.0346	-0.59	-1.51	GTP binding protein 3 [Source:MGI Symbol;Acc:MGI:1917609]
Myg1	5.53	5.06	-3.48	0.00103	0.0346	-0.449	-1.37	melanocyte proliferating gene 1 [Source:MGI Symbol;Acc:MGI:1929864]
Borcs6	4.15	3.33	-3.48	0.00103	0.0346	-0.903	-1.87	BLOC-1 related complex subunit 6 [Source:MGI Symbol;Acc:MGI:1919173]
Ptbp2	7.95	8.58	3.48	0.00103	0.0346	0.64	1.56	polypyrimidine tract binding protein 2 [Source:MGI Symbol;Acc:MGI:1860489]
Cx3cr1	4.44	3.73	-3.48	0.00103	0.0346	-0.782	-1.72	chemokine (C-X3-C motif) receptor 1 [Source:MGI Symbol;Acc:MGI:1333815]
Col9a2	3.75	3.09	-3.48	0.00104	0.0346	-0.759	-1.69	collagen, type IX, alpha 2 [Source:MGI Symbol;Acc:MGI:88466]
Pick1	5.57	5.07	-3.48	0.00104	0.0346	-0.552	-1.47	protein interacting with C kinase 1 [Source:MGI Symbol;Acc:MGI:894645]
Kcna1	6.96	7.66	3.48	0.00104	0.0346	0.68	1.6	potassium voltage-gated channel, shaker-related subfamily, member 1 [Source:MGI Symbol;Acc:MGI:96654]
Rb1	4.89	5.67	3.48	0.00104	0.0346	0.685	1.61	retinoblastoma 1 [Source:MGI Symbol;Acc:MGI:97874]
Pafah1b1	9.53	9.99	3.48	0.00104	0.0346	0.44	1.36	platelet-activating factor acetylhydrolase, isoform 1b, subunit 1 [Source:MGI Symbol;Acc:MGI:109520]
Slc45a4	5.96	5.64	-3.48	0.00104	0.0346	-0.416	-1.33	solute carrier family 45, member 4 [Source:MGI Symbol;Acc:MGI:2146236]
Prrt4	3.47	2.9	-3.48	0.00105	0.0346	-0.797	-1.74	proline-rich transmembrane protein 4 [Source:MGI Symbol;Acc:MGI:2141677]
Ogfod2	4.73	4.03	-3.48	0.00105	0.0346	-0.719	-1.65	2-oxoglutarate and iron-dependent oxygenase domain containing 2 [Source:MGI Symbol;Acc:MGI:1913877]
Atl3	5.28	5.8	3.47	0.00106	0.0346	0.476	1.39	atlastin GTPase 3 [Source:MGI Symbol;Acc:MGI:1924270]
4933403O08Rik	-1.45	0.396	3.47	0.00106	0.0346	1.78	3.42	RIKEN cDNA 4933403O08 gene [Source:MGI Symbol;Acc:MGI:1918280]
Hecw1	5.65	6.29	3.47	0.00106	0.0346	0.78	1.72	HECT, C2 and WW domain containing E3 ubiquitin protein ligase 1 [Source:MGI Symbol;Acc:MGI:2444115]
Galnt18	4.53	3.89	-3.47	0.00106	0.0346	-0.761	-1.69	UDP-N-acetyl-alpha-D-galactosamine:polypeptide N-acetylgalactosaminyltransferase 18 [Source:MGI Symbol;Acc:MGI:2446239]
Dcaf15	4.85	4.33	-3.47	0.00107	0.0349	-0.583	-1.5	DDB1 and CUL4 associated factor 15 [Source:MGI Symbol;Acc:MGI:2684420]
Fam126b	6.32	7.05	3.47	0.00108	0.0349	0.787	1.73	family with sequence similarity 126, member B [Source:MGI Symbol;Acc:MGI:1098784]
Arl5a	6.28	6.89	3.47	0.00108	0.0349	0.601	1.52	ADP-ribosylation factor-like 5A [Source:MGI Symbol;Acc:MGI:1922673]
Rrp7a	5.51	4.99	-3.47	0.00108	0.0349	-0.585	-1.5	ribosomal RNA processing 7 homolog A (S. cerevisiae) [Source:MGI Symbol;Acc:MGI:1922028]
Rbm17	5.75	5.21	-3.47	0.00108	0.0349	-0.464	-1.38	RNA binding motif protein 17 [Source:MGI Symbol;Acc:MGI:1924188]
Gtpbp2	6.12	5.78	-3.47	0.00108	0.0349	-0.445	-1.36	GTP binding protein 2 [Source:MGI Symbol;Acc:MGI:1860138]
Hmgcs1	7.58	7.94	3.47	0.00108	0.0349	0.44	1.36	3-hydroxy-3-methylglutaryl-Coenzyme A synthase 1 [Source:MGI Symbol;Acc:MGI:107592]
Utrn	6.22	6.83	3.46	0.00109	0.0349	0.561	1.48	utrophin [Source:MGI Symbol;Acc:MGI:104631]
Ankrd28	4.98	5.69	3.46	0.00109	0.0349	0.61	1.53	ankyrin repeat domain 28 [Source:MGI Symbol;Acc:MGI:2145661]
Tsta3	3.57	3.05	-3.46	0.00109	0.0349	-0.604	-1.52	tissue specific transplantation antigen P35B [Source:MGI Symbol;Acc:MGI:98857]
0610010F05Rik	5.84	6.32	3.46	0.00109	0.0349	0.493	1.41	RIKEN cDNA 0610010F05 gene [Source:MGI Symbol;Acc:MGI:1918925]
Rps6kc1	6.05	5.61	-3.46	0.00109	0.0349	-0.485	-1.4	ribosomal protein S6 kinase polypeptide 1 [Source:MGI Symbol;Acc:MGI:2443419]
Gm15918	-2.7	-0.525	3.46	0.00109	0.0349	2.55	5.86	predicted gene 15918 [Source:MGI Symbol;Acc:MGI:3801738]
C4b	6	5.62	-3.46	0.00109	0.0349	-0.515	-1.43	complement component 4B (Chido blood group) [Source:MGI Symbol;Acc:MGI:88228]
4930518I15Rik	0.116	1.6	3.46	0.0011	0.035	1.4	2.63	RIKEN cDNA 4930518I15 gene [Source:MGI Symbol;Acc:MGI:1921954]
Psd	6.84	6.44	-3.46	0.00111	0.0352	-0.502	-1.42	pleckstrin and Sec7 domain containing [Source:MGI Symbol;Acc:MGI:1920978]
Zc3h12b	4.12	4.77	3.46	0.00111	0.0352	0.595	1.51	zinc finger CCCH-type containing 12B [Source:MGI Symbol;Acc:MGI:2442133]
Usp32	7.18	7.8	3.45	0.00112	0.0352	0.551	1.47	ubiquitin specific peptidase 32 [Source:MGI Symbol;Acc:MGI:2144475]
Snapc2	4.6	4.07	-3.45	0.00112	0.0352	-0.516	-1.43	small nuclear RNA activating complex, polypeptide 2 [Source:MGI Symbol;Acc:MGI:1914861]
Gm26852	0.974	-0.085	-3.45	0.00112	0.0352	-1.17	-2.25	predicted gene, 26852 [Source:MGI Symbol;Acc:MGI:5477346]
Rbck1	6.37	5.8	-3.45	0.00113	0.0352	-0.631	-1.55	RanBP-type and C3HC4-type zinc finger containing 1 [Source:MGI Symbol;Acc:MGI:1344372]
Rgl2	6.61	6.13	-3.45	0.00113	0.0352	-0.554	-1.47	ral guanine nucleotide dissociation stimulator-like 2 [Source:MGI Symbol;Acc:MGI:107483]
Gm2464	0.969	-0.575	-3.45	0.00113	0.0352	-1.6	-3.03	predicted gene 2464 [Source:MGI Symbol;Acc:MGI:3780631]
Rfx2	2.01	1.26	-3.45	0.00113	0.0352	-1.01	-2.02	regulatory factor X, 2 (influences HLA class II expression) [Source:MGI Symbol;Acc:MGI:106583]
Lrrc73	4.19	3.42	-3.45	0.00114	0.0352	-0.868	-1.83	leucine rich repeat containing 73 [Source:MGI Symbol;Acc:MGI:2684934]
Fbrsl1	5.32	5.03	-3.45	0.00114	0.0352	-0.453	-1.37	fibrosin-like 1 [Source:MGI Symbol;Acc:MGI:1920907]
Pdlim7	5.42	4.71	-3.45	0.00114	0.0352	-0.734	-1.66	PDZ and LIM domain 7 [Source:MGI Symbol;Acc:MGI:1914649]
Nrg2	3.02	2.53	-3.45	0.00114	0.0352	-0.644	-1.56	neuregulin 2 [Source:MGI Symbol;Acc:MGI:1098246]
Mpp2	6.9	6.47	-3.45	0.00114	0.0352	-0.491	-1.41	membrane protein, palmitoylated 2 (MAGUK p55 subfamily member 2) [Source:MGI Symbol;Acc:MGI:1858257]
Plek	3.77	4.33	3.45	0.00114	0.0352	0.713	1.64	pleckstrin [Source:MGI Symbol;Acc:MGI:1860485]
Pcdh11x	5.13	5.87	3.45	0.00115	0.0352	0.847	1.8	protocadherin 11 X-linked [Source:MGI Symbol;Acc:MGI:2442849]
Lmnb2	5.19	4.62	-3.45	0.00115	0.0352	-0.558	-1.47	lamin B2 [Source:MGI Symbol;Acc:MGI:96796]
Isoc2a	3.92	3.07	-3.44	0.00115	0.0352	-0.888	-1.85	isochorismatase domain containing 2a [Source:MGI Symbol;Acc:MGI:3609243]
Apba3	3.22	2.25	-3.45	0.00115	0.0352	-1.03	-2.04	amyloid beta (A4) precursor protein-binding, family A, member 3 [Source:MGI Symbol;Acc:MGI:1888527]
Stab1	4.47	4.01	-3.45	0.00115	0.0352	-0.661	-1.58	stabilin 1 [Source:MGI Symbol;Acc:MGI:2178742]
Gm26803	-1.54	-0.174	3.44	0.00116	0.0352	1.92	3.78	predicted gene, 26803 [Source:MGI Symbol;Acc:MGI:5477297]
Npc2	5.16	4.52	-3.44	0.00116	0.0352	-0.613	-1.53	Niemann-Pick type C2 [Source:MGI Symbol;Acc:MGI:1915213]
Gm23119	-0.0945	0.923	3.44	0.00116	0.0352	1.75	3.37	predicted gene, 23119 [Source:MGI Symbol;Acc:MGI:5452896]
Atrx	7.3	7.81	3.44	0.00117	0.0352	0.555	1.47	alpha thalassemia/mental retardation syndrome X-linked homolog (human) [Source:MGI Symbol;Acc:MGI:103067]
Foxred1	5.84	5.54	-3.44	0.00117	0.0352	-0.353	-1.28	FAD-dependent oxidoreductase domain containing 1 [Source:MGI Symbol;Acc:MGI:2446262]
Lppr2	6.29	5.78	-3.44	0.00117	0.0352	-0.567	-1.48	lipid phosphate phosphatase-related protein type 2 [Source:MGI Symbol;Acc:MGI:2384575]
Slc46a1	4.23	3.74	-3.44	0.00117	0.0352	-0.572	-1.49	solute carrier family 46, member 1 [Source:MGI Symbol;Acc:MGI:1098733]
Hexim1	5.95	5.39	-3.44	0.00117	0.0352	-0.551	-1.46	hexamethylene bis-acetamide inducible 1 [Source:MGI Symbol;Acc:MGI:2385923]
Dpp9	5.73	5.41	-3.44	0.00117	0.0352	-0.439	-1.36	dipeptidylpeptidase 9 [Source:MGI Symbol;Acc:MGI:2443967]
Wdr33	5.98	5.69	-3.44	0.00118	0.0352	-0.346	-1.27	WD repeat domain 33 [Source:MGI Symbol;Acc:MGI:1921570]
Gm28498	2.41	1.69	-3.44	0.00118	0.0352	-0.922	-1.89	predicted gene 28498 [Source:MGI Symbol;Acc:MGI:5579204]
Ehmt1	5.81	5.55	-3.44	0.00118	0.0352	-0.313	-1.24	euchromatic histone methyltransferase 1 [Source:MGI Symbol;Acc:MGI:1924933]
Opa1	7.51	7.92	3.44	0.00118	0.0352	0.413	1.33	optic atrophy 1 [Source:MGI Symbol;Acc:MGI:1921393]
Tanc2	8.08	8.47	3.44	0.00118	0.0352	0.493	1.41	tetratricopeptide repeat, ankyrin repeat and coiled-coil containing 2 [Source:MGI Symbol;Acc:MGI:2444121]
Csk	5.17	4.77	-3.44	0.00118	0.0352	-0.538	-1.45	c-src tyrosine kinase [Source:MGI Symbol;Acc:MGI:88537]
Dgcr14	4.24	3.74	-3.44	0.00118	0.0352	-0.535	-1.45	DiGeorge syndrome critical region gene 14 [Source:MGI Symbol;Acc:MGI:107854]
Gm20342	2.97	3.59	3.44	0.00118	0.0352	0.786	1.72	predicted gene, 20342 [Source:MGI Symbol;Acc:MGI:5012527]
Slc25a19	5.19	4.58	-3.44	0.00118	0.0352	-0.591	-1.51	solute carrier family 25 (mitochondrial thiamine pyrophosphate carrier), member 19 [Source:MGI Symbol;Acc:MGI:1914533]
2900097C17Rik	5.68	6.56	3.44	0.00119	0.0352	0.73	1.66	RIKEN cDNA 2900097C17 gene [Source:MGI Symbol;Acc:MGI:1914767]
Iws1	5.45	5.89	3.44	0.00119	0.0352	0.504	1.42	IWS1 homolog (S. cerevisiae) [Source:MGI Symbol;Acc:MGI:1920723]
Gm15337	-0.709	0.987	3.43	0.00119	0.0352	1.61	3.06	predicted gene 15337 [Source:MGI Symbol;Acc:MGI:3705103]
Larp4	5.25	6.03	3.43	0.00119	0.0352	0.849	1.8	La ribonucleoprotein domain family, member 4 [Source:MGI Symbol;Acc:MGI:2443114]
Arl6ip4	3.75	2.69	-3.43	0.00119	0.0352	-0.963	-1.95	ADP-ribosylation factor-like 6 interacting protein 4 [Source:MGI Symbol;Acc:MGI:1929500]
Higd1a	5.25	5.49	3.43	0.00119	0.0352	0.41	1.33	HIG1 domain family, member 1A [Source:MGI Symbol;Acc:MGI:1930666]
Kif17	5.07	4.56	-3.43	0.0012	0.0353	-0.595	-1.51	kinesin family member 17 [Source:MGI Symbol;Acc:MGI:1098229]
Rmdn2	3.23	3.71	3.43	0.0012	0.0353	0.554	1.47	regulator of microtubule dynamics 2 [Source:MGI Symbol;Acc:MGI:2147043]
Snord49a	5.19	8.28	3.43	0.0012	0.0353	4.42	21.4	small nucleolar RNA, C/D box 49A [Source:MGI Symbol;Acc:MGI:3819538]
Slc25a10	3.43	2.75	-3.43	0.00121	0.0353	-0.897	-1.86	solute carrier family 25 (mitochondrial carrier, dicarboxylate transporter), member 10 [Source:MGI Symbol;Acc:MGI:1353497]
Itgb8	6.16	7.1	3.43	0.00121	0.0353	0.899	1.86	integrin beta 8 [Source:MGI Symbol;Acc:MGI:1338035]
Btbd2	5.82	5.27	-3.43	0.00121	0.0353	-0.654	-1.57	BTB (POZ) domain containing 2 [Source:MGI Symbol;Acc:MGI:1933831]
Bet1l	4.51	3.96	-3.43	0.00121	0.0353	-0.559	-1.47	blocked early in transport 1 homolog (S. cerevisiae)-like [Source:MGI Symbol;Acc:MGI:1913128]
Zcwpw1	1.91	2.5	3.43	0.00121	0.0353	0.852	1.81	zinc finger, CW type with PWWP domain 1 [Source:MGI Symbol;Acc:MGI:2685899]
Clcn3	7.76	8.25	3.43	0.00122	0.0354	0.484	1.4	chloride channel, voltage-sensitive 3 [Source:MGI Symbol;Acc:MGI:103555]
Ccdc13	2.29	1.44	-3.43	0.00122	0.0354	-0.875	-1.83	coiled-coil domain containing 13 [Source:MGI Symbol;Acc:MGI:1920144]
Hectd2	2.2	3.62	3.42	0.00123	0.0355	1.21	2.31	HECT domain containing 2 [Source:MGI Symbol;Acc:MGI:2442663]
Gmppb	3.44	2.88	-3.42	0.00123	0.0355	-0.637	-1.56	GDP-mannose pyrophosphorylase B [Source:MGI Symbol;Acc:MGI:2660880]
Tcof1	4.06	3.58	-3.42	0.00123	0.0355	-0.597	-1.51	Treacher Collins Franceschetti syndrome 1, homolog [Source:MGI Symbol;Acc:MGI:892003]
8430422M14Rik	3.27	2.38	-3.42	0.00123	0.0355	-0.745	-1.68	RIKEN cDNA 8430422M14 gene [Source:MGI Symbol;Acc:MGI:1925753]
Ptpn23	6.55	6.25	-3.42	0.00124	0.0355	-0.427	-1.34	protein tyrosine phosphatase, non-receptor type 23 [Source:MGI Symbol;Acc:MGI:2144837]
Pcm1	7.37	7.96	3.42	0.00124	0.0355	0.578	1.49	pericentriolar material 1 [Source:MGI Symbol;Acc:MGI:1277958]
Ddx19b	5.14	5.68	3.42	0.00124	0.0355	0.5	1.41	DEAD (Asp-Glu-Ala-Asp) box polypeptide 19b [Source:MGI Symbol;Acc:MGI:2148251]
Slc35a3	4.07	4.71	3.42	0.00124	0.0355	0.576	1.49	solute carrier family 35 (UDP-N-acetylglucosamine (UDP-GlcNAc) transporter), member 3 [Source:MGI Symbol;Acc:MGI:1917648]
Zdhhc21	5.71	6.14	3.42	0.00125	0.0356	0.494	1.41	zinc finger, DHHC domain containing 21 [Source:MGI Symbol;Acc:MGI:1915518]
Ubn2	6.58	7.15	3.42	0.00125	0.0356	0.58	1.5	ubinuclein 2 [Source:MGI Symbol;Acc:MGI:2444236]
Tmem56	5.58	6.12	3.42	0.00125	0.0356	0.651	1.57	transmembrane protein 56 [Source:MGI Symbol;Acc:MGI:1923195]
Csnk1d	7.76	7.43	-3.42	0.00125	0.0356	-0.355	-1.28	casein kinase 1, delta [Source:MGI Symbol;Acc:MGI:1355272]
Mtif3	1.57	0.58	-3.42	0.00125	0.0356	-1.06	-2.09	mitochondrial translational initiation factor 3 [Source:MGI Symbol;Acc:MGI:1923616]
Grik3	6.94	6.61	-3.42	0.00126	0.0356	-0.473	-1.39	glutamate receptor, ionotropic, kainate 3 [Source:MGI Symbol;Acc:MGI:95816]
NA	-1.92	0.481	3.42	0.00126	0.0356	2.31	4.97	NA
Slc19a2	5.31	5.68	3.42	0.00126	0.0356	0.401	1.32	solute carrier family 19 (thiamine transporter), member 2 [Source:MGI Symbol;Acc:MGI:1928761]
A230006K03Rik	1.38	2.32	3.41	0.00126	0.0356	1	2	RIKEN cDNA A230006K03 gene [Source:MGI Symbol;Acc:MGI:3644205]
Gsk3a	6.41	5.97	-3.41	0.00126	0.0356	-0.518	-1.43	glycogen synthase kinase 3 alpha [Source:MGI Symbol;Acc:MGI:2152453]
Camsap2	7.44	7.9	3.41	0.00127	0.0357	0.478	1.39	calmodulin regulated spectrin-associated protein family, member 2 [Source:MGI Symbol;Acc:MGI:1922434]
Ptrf	4.89	4.34	-3.41	0.00127	0.0357	-0.582	-1.5	polymerase I and transcript release factor [Source:MGI Symbol;Acc:MGI:1277968]
Agpat2	1.35	0.053	-3.41	0.00127	0.0356	-1.25	-2.37	1-acylglycerol-3-phosphate O-acyltransferase 2 (lysophosphatidic acid acyltransferase, beta) [Source:MGI Symbol;Acc:MGI:1914762]
Pofut2	5.1	4.6	-3.41	0.00128	0.0357	-0.619	-1.54	protein O-fucosyltransferase 2 [Source:MGI Symbol;Acc:MGI:1916863]
Ube3a	7.84	8.38	3.41	0.00128	0.0357	0.717	1.64	ubiquitin protein ligase E3A [Source:MGI Symbol;Acc:MGI:105098]
Cpt1c	6.69	6.33	-3.41	0.00128	0.0357	-0.414	-1.33	carnitine palmitoyltransferase 1c [Source:MGI Symbol;Acc:MGI:2446526]
Wbscr22	4.35	3.81	-3.41	0.00128	0.0357	-0.637	-1.56	Williams Beuren syndrome chromosome region 22 [Source:MGI Symbol;Acc:MGI:1913388]
Trim47	1.57	0.414	-3.41	0.00128	0.0357	-1.23	-2.34	tripartite motif-containing 47 [Source:MGI Symbol;Acc:MGI:1917374]
Relt	4.75	4.3	-3.41	0.00129	0.0359	-0.584	-1.5	RELT tumor necrosis factor receptor [Source:MGI Symbol;Acc:MGI:2443373]
Gm26809	1.63	2.59	3.41	0.00129	0.0359	1.14	2.2	predicted gene, 26809 [Source:MGI Symbol;Acc:MGI:5477303]
Zfp768	3.2	2.68	-3.4	0.0013	0.0359	-0.609	-1.52	zinc finger protein 768 [Source:MGI Symbol;Acc:MGI:2384582]
Adck4	5.18	4.62	-3.4	0.0013	0.0359	-0.656	-1.58	aarF domain containing kinase 4 [Source:MGI Symbol;Acc:MGI:1924139]
Med25	5.05	4.58	-3.4	0.0013	0.0359	-0.705	-1.63	mediator complex subunit 25 [Source:MGI Symbol;Acc:MGI:1922863]
Adra1a	2.04	3.35	3.4	0.00131	0.0359	1.08	2.12	adrenergic receptor, alpha 1a [Source:MGI Symbol;Acc:MGI:104773]
Zfp523	5.58	5.07	-3.4	0.00131	0.0359	-0.595	-1.51	zinc finger protein 523 [Source:MGI Symbol;Acc:MGI:2687278]
Tmem86b	3.71	3.22	-3.4	0.00131	0.0359	-0.602	-1.52	transmembrane protein 86B [Source:MGI Symbol;Acc:MGI:1915505]
Postn	0.415	1.86	3.4	0.00131	0.0359	1.6	3.02	periostin, osteoblast specific factor [Source:MGI Symbol;Acc:MGI:1926321]
Spcs2-ps	1.78	0.811	-3.4	0.00131	0.0359	-1.45	-2.73	signal peptidase complex subunit 2, pseudogene [Source:MGI Symbol;Acc:MGI:3650451]
2310039H08Rik	0.874	-0.111	-3.4	0.00132	0.036	-1.06	-2.09	RIKEN cDNA 2310039H08 gene [Source:MGI Symbol;Acc:MGI:1914351]
Mest	3.98	4.7	3.4	0.00132	0.0361	0.691	1.61	mesoderm specific transcript [Source:MGI Symbol;Acc:MGI:96968]
Zxdb	4.01	4.64	3.4	0.00132	0.036	0.707	1.63	zinc finger, X-linked, duplicated B [Source:MGI Symbol;Acc:MGI:3694898]
Gm42672	-2.55	0.0436	3.4	0.00133	0.0363	2.6	6.08	predicted gene 42672 [Source:MGI Symbol;Acc:MGI:5662809]
Paf1	5.59	4.98	-3.39	0.00134	0.0364	-0.592	-1.51	Paf1, RNA polymerase II associated factor, homolog (S. cerevisiae) [Source:MGI Symbol;Acc:MGI:1923988]
Cecr5	5.16	4.76	-3.39	0.00134	0.0364	-0.449	-1.36	cat eye syndrome chromosome region, candidate 5 [Source:MGI Symbol;Acc:MGI:2136976]
Dcc	1.21	3.38	3.39	0.00135	0.0365	2.17	4.51	deleted in colorectal carcinoma [Source:MGI Symbol;Acc:MGI:94869]
Bmpr2	7.28	7.98	3.39	0.00135	0.0365	0.753	1.69	bone morphogenetic protein receptor, type II (serine/threonine kinase) [Source:MGI Symbol;Acc:MGI:1095407]
Zmym5	5.61	6.03	3.39	0.00135	0.0365	0.496	1.41	zinc finger, MYM-type 5 [Source:MGI Symbol;Acc:MGI:3041170]
Nrxn1	7.69	8.2	3.39	0.00136	0.0365	0.525	1.44	neurexin I [Source:MGI Symbol;Acc:MGI:1096391]
Tcf23	0.178	-1.75	-3.39	0.00136	0.0365	-1.97	-3.92	transcription factor 23 [Source:MGI Symbol;Acc:MGI:1934960]
Rps3a3	-0.87	-3.1	-3.39	0.00136	0.0365	-2.25	-4.77	ribosomal protein S3A3 [Source:MGI Symbol;Acc:MGI:3643406]
Ube2k	6.82	7.04	3.39	0.00136	0.0365	0.336	1.26	ubiquitin-conjugating enzyme E2K [Source:MGI Symbol;Acc:MGI:1858216]
Syt5	7.25	6.71	-3.39	0.00137	0.0365	-0.558	-1.47	synaptotagmin V [Source:MGI Symbol;Acc:MGI:1926368]
Ciz1	4.99	4.48	-3.39	0.00137	0.0365	-0.555	-1.47	CDKN1A interacting zinc finger protein 1 [Source:MGI Symbol;Acc:MGI:1920234]
Snapc1	5.96	6.41	3.39	0.00137	0.0365	0.459	1.37	small nuclear RNA activating complex, polypeptide 1 [Source:MGI Symbol;Acc:MGI:1922877]
Elavl2	7.59	8.11	3.39	0.00137	0.0365	0.602	1.52	ELAV (embryonic lethal, abnormal vision, Drosophila)-like 2 (Hu antigen B) [Source:MGI Symbol;Acc:MGI:1100887]
mt-Tg	0.475	1.88	3.39	0.00137	0.0365	1.63	3.09	mitochondrially encoded tRNA glycine [Source:MGI Symbol;Acc:MGI:102486]
Cpsf1	5.99	5.65	-3.39	0.00138	0.0365	-0.495	-1.41	cleavage and polyadenylation specific factor 1 [Source:MGI Symbol;Acc:MGI:2679722]
Dnmt1	6.42	6.17	-3.39	0.00138	0.0365	-0.347	-1.27	DNA methyltransferase (cytosine-5) 1 [Source:MGI Symbol;Acc:MGI:94912]
Uhrf1bp1l	5.8	6.27	3.38	0.00138	0.0366	0.438	1.36	UHRF1 (ICBP90) binding protein 1-like [Source:MGI Symbol;Acc:MGI:2442888]
Usp19	7.72	7.41	-3.39	0.00138	0.0365	-0.403	-1.32	ubiquitin specific peptidase 19 [Source:MGI Symbol;Acc:MGI:1918722]
Rhof	4.78	4.28	-3.39	0.00138	0.0365	-0.564	-1.48	ras homolog gene family, member f [Source:MGI Symbol;Acc:MGI:1345629]
Fam210a	5.74	6.25	3.38	0.00139	0.0368	0.576	1.49	family with sequence similarity 210, member A [Source:MGI Symbol;Acc:MGI:1914000]
Fcho1	5.83	5.39	-3.38	0.00139	0.0368	-0.629	-1.55	FCH domain only 1 [Source:MGI Symbol;Acc:MGI:1921265]
Capza1	4.5	5.09	3.38	0.00141	0.0371	0.616	1.53	capping protein (actin filament) muscle Z-line, alpha 1 [Source:MGI Symbol;Acc:MGI:106227]
Ostm1	6.17	6.58	3.38	0.00141	0.0372	0.441	1.36	osteopetrosis associated transmembrane protein 1 [Source:MGI Symbol;Acc:MGI:2655574]
Zfp219	5.39	4.7	-3.38	0.00142	0.0372	-0.679	-1.6	zinc finger protein 219 [Source:MGI Symbol;Acc:MGI:1917140]
Far1	7.49	8.14	3.37	0.00142	0.0373	0.635	1.55	fatty acyl CoA reductase 1 [Source:MGI Symbol;Acc:MGI:1914670]
Ept1	6.89	7.2	3.37	0.00142	0.0373	0.31	1.24	ethanolaminephosphotransferase 1 (CDP-ethanolamine-specific) [Source:MGI Symbol;Acc:MGI:107898]
Rif1	5.28	5.95	3.37	0.00143	0.0373	0.674	1.6	Rap1 interacting factor 1 homolog (yeast) [Source:MGI Symbol;Acc:MGI:1098622]
Tnrc6b	6.8	7.48	3.37	0.00143	0.0373	0.621	1.54	trinucleotide repeat containing 6b [Source:MGI Symbol;Acc:MGI:2443730]
Skiv2l	6.7	6.27	-3.37	0.00144	0.0375	-0.463	-1.38	superkiller viralicidic activity 2-like (S. cerevisiae) [Source:MGI Symbol;Acc:MGI:1099835]
Rock2	6.97	7.51	3.37	0.00145	0.0376	0.54	1.45	Rho-associated coiled-coil containing protein kinase 2 [Source:MGI Symbol;Acc:MGI:107926]
Tia1	7.02	7.63	3.37	0.00145	0.0376	0.633	1.55	cytotoxic granule-associated RNA binding protein 1 [Source:MGI Symbol;Acc:MGI:107914]
Gm20683	-0.232	-2.22	-3.37	0.00145	0.0376	-2.02	-4.06	predicted gene 20683 [Source:MGI Symbol;Acc:MGI:5313130]
Creld1	6.19	5.46	-3.37	0.00145	0.0376	-0.728	-1.66	cysteine-rich with EGF-like domains 1 [Source:MGI Symbol;Acc:MGI:2152539]
Gm37303	-0.669	1.43	3.37	0.00145	0.0376	1.86	3.64	predicted gene, 37303 [Source:MGI Symbol;Acc:MGI:5610531]
Rc3h1	5.66	6.22	3.37	0.00146	0.0376	0.681	1.6	RING CCCH (C3H) domains 1 [Source:MGI Symbol;Acc:MGI:2685397]
A230001M10Rik	1.07	2.2	3.37	0.00146	0.0376	1.36	2.56	RIKEN cDNA A230001M10 gene [Source:MGI Symbol;Acc:MGI:2443043]
Adsl	4.93	4.46	-3.37	0.00146	0.0376	-0.608	-1.52	adenylosuccinate lyase [Source:MGI Symbol;Acc:MGI:103202]
Nyap1	6.77	6.21	-3.37	0.00146	0.0376	-0.684	-1.61	neuronal tyrosine-phosphorylated phosphoinositide 3-kinase adaptor 1 [Source:MGI Symbol;Acc:MGI:2443880]
Ryr2	7.02	7.76	3.36	0.00147	0.0377	0.629	1.55	ryanodine receptor 2, cardiac [Source:MGI Symbol;Acc:MGI:99685]
Akap8l	7.1	6.77	-3.36	0.00147	0.0377	-0.402	-1.32	A kinase (PRKA) anchor protein 8-like [Source:MGI Symbol;Acc:MGI:1860606]
Smpd4	5.72	5.36	-3.36	0.00147	0.0377	-0.437	-1.35	sphingomyelin phosphodiesterase 4 [Source:MGI Symbol;Acc:MGI:1924876]
Cyhr1	6.94	6.5	-3.36	0.00147	0.0377	-0.441	-1.36	cysteine and histidine rich 1 [Source:MGI Symbol;Acc:MGI:1859320]
Rapgef4	7.32	7.82	3.36	0.00148	0.0378	0.474	1.39	Rap guanine nucleotide exchange factor (GEF) 4 [Source:MGI Symbol;Acc:MGI:1917723]
Gm13416	-0.893	0.213	3.36	0.00149	0.0379	1.9	3.73	predicted gene 13416 [Source:MGI Symbol;Acc:MGI:3652158]
Cltc	9.73	10.2	3.36	0.00149	0.0379	0.401	1.32	clathrin, heavy polypeptide (Hc) [Source:MGI Symbol;Acc:MGI:2388633]
Dok3	2.78	1.96	-3.36	0.00149	0.0379	-0.917	-1.89	docking protein 3 [Source:MGI Symbol;Acc:MGI:1351490]
Zap70	2.96	1.94	-3.36	0.00149	0.0379	-1.04	-2.05	zeta-chain (TCR) associated protein kinase [Source:MGI Symbol;Acc:MGI:99613]
Gm37310	-0.298	2.15	3.36	0.0015	0.0379	2.35	5.09	predicted gene, 37310 [Source:MGI Symbol;Acc:MGI:5610538]
Clpp	5.17	4.49	-3.36	0.0015	0.0379	-0.739	-1.67	caseinolytic mitochondrial matrix peptidase proteolytic subunit [Source:MGI Symbol;Acc:MGI:1858213]
Caly	7.12	6.27	-3.36	0.0015	0.0379	-0.852	-1.81	calcyon neuron-specific vesicular protein [Source:MGI Symbol;Acc:MGI:1915816]
Cops5	6.15	6.5	3.36	0.00151	0.038	0.515	1.43	COP9 (constitutive photomorphogenic) homolog, subunit 5 (Arabidopsis thaliana) [Source:MGI Symbol;Acc:MGI:1349415]
Nhlrc2	2.54	3.37	3.35	0.00152	0.0382	0.767	1.7	NHL repeat containing 2 [Source:MGI Symbol;Acc:MGI:1914116]
Itgav	6.54	7.2	3.35	0.00152	0.0382	0.645	1.56	integrin alpha V [Source:MGI Symbol;Acc:MGI:96608]
Ip6k2	3.63	2.75	-3.35	0.00152	0.0382	-1	-2	inositol hexaphosphate kinase 2 [Source:MGI Symbol;Acc:MGI:1923750]
Chml	3.69	4.54	3.35	0.00153	0.0382	0.709	1.63	choroideremia-like [Source:MGI Symbol;Acc:MGI:101913]
Slc35e2	6.21	6.69	3.35	0.00153	0.0382	0.593	1.51	solute carrier family 35, member E2 [Source:MGI Symbol;Acc:MGI:2444240]
Bag6	7.57	7.28	-3.35	0.00153	0.0382	-0.424	-1.34	BCL2-associated athanogene 6 [Source:MGI Symbol;Acc:MGI:1919439]
Jmjd1c	5.56	6.08	3.35	0.00153	0.0382	0.499	1.41	jumonji domain containing 1C [Source:MGI Symbol;Acc:MGI:1918614]
Mta1	5.16	4.73	-3.35	0.00153	0.0382	-0.513	-1.43	metastasis associated 1 [Source:MGI Symbol;Acc:MGI:2150037]
Rnf10	7.65	7.34	-3.35	0.00153	0.0382	-0.328	-1.26	ring finger protein 10 [Source:MGI Symbol;Acc:MGI:1859162]
Stxbp6	5.68	6.29	3.35	0.00154	0.0383	0.697	1.62	syntaxin binding protein 6 (amisyn) [Source:MGI Symbol;Acc:MGI:2384963]
Hmha1	2.8	2.13	-3.35	0.00154	0.0383	-0.699	-1.62	histocompatibility (minor) HA-1 [Source:MGI Symbol;Acc:MGI:1917969]
Btf3l4	5.02	5.7	3.35	0.00154	0.0383	0.817	1.76	basic transcription factor 3-like 4 [Source:MGI Symbol;Acc:MGI:1915312]
Pomc	4.17	2.27	-3.35	0.00155	0.0383	-1.63	-3.09	pro-opiomelanocortin-alpha [Source:MGI Symbol;Acc:MGI:97742]
Smtn	3.25	2.49	-3.34	0.00155	0.0383	-0.845	-1.8	smoothelin [Source:MGI Symbol;Acc:MGI:1354727]
Preb	5.94	5.47	-3.34	0.00156	0.0383	-0.474	-1.39	prolactin regulatory element binding [Source:MGI Symbol;Acc:MGI:1355326]
Ankrd13d	5.86	5.36	-3.34	0.00156	0.0383	-0.535	-1.45	ankyrin repeat domain 13 family, member D [Source:MGI Symbol;Acc:MGI:1915673]
Zfp68	5.63	6.15	3.34	0.00156	0.0383	0.552	1.47	zinc finger protein 68 [Source:MGI Symbol;Acc:MGI:1344427]
Ap3b2	8.18	7.81	-3.34	0.00156	0.0383	-0.428	-1.35	adaptor-related protein complex 3, beta 2 subunit [Source:MGI Symbol;Acc:MGI:1100869]
Ddost	6.31	5.9	-3.34	0.00157	0.0383	-0.496	-1.41	dolichyl-di-phosphooligosaccharide-protein glycotransferase [Source:MGI Symbol;Acc:MGI:1194508]
Tmem33	6.64	7.15	3.34	0.00157	0.0383	0.489	1.4	transmembrane protein 33 [Source:MGI Symbol;Acc:MGI:1915128]
Mroh7	4.19	3.56	-3.34	0.00157	0.0383	-0.72	-1.65	maestro heat-like repeat family member 7 [Source:MGI Symbol;Acc:MGI:2685873]
P4ha2	4.93	4.58	-3.34	0.00157	0.0383	-0.411	-1.33	procollagen-proline, 2-oxoglutarate 4-dioxygenase (proline 4-hydroxylase), alpha II polypeptide [Source:MGI Symbol;Acc:MGI:894286]
Gm42664	0.303	2.33	3.34	0.00158	0.0383	2.34	5.07	predicted gene 42664 [Source:MGI Symbol;Acc:MGI:5662801]
Myo6	6.79	7.23	3.34	0.00158	0.0383	0.486	1.4	myosin VI [Source:MGI Symbol;Acc:MGI:104785]
Ank2	9.29	9.74	3.34	0.00158	0.0383	0.437	1.35	ankyrin 2, brain [Source:MGI Symbol;Acc:MGI:88025]
Gm37814	3.81	4.71	3.34	0.00158	0.0383	1.42	2.67	predicted gene, 37814 [Source:MGI Symbol;Acc:MGI:5611042]
Prrc2a	8.98	8.71	-3.34	0.00158	0.0383	-0.36	-1.28	proline-rich coiled-coil 2A [Source:MGI Symbol;Acc:MGI:1915467]
Atxn2l	7.36	7.11	-3.34	0.00158	0.0383	-0.391	-1.31	ataxin 2-like [Source:MGI Symbol;Acc:MGI:2446242]
H2-T24	1.38	2.85	3.34	0.00159	0.0383	1.45	2.74	histocompatibility 2, T region locus 24 [Source:MGI Symbol;Acc:MGI:95958]
Hdac6	6.5	6.27	-3.34	0.00159	0.0383	-0.33	-1.26	histone deacetylase 6 [Source:MGI Symbol;Acc:MGI:1333752]
Emx2os	-0.694	0.889	3.34	0.00159	0.0383	1.4	2.63	Emx2 opposite strand/antisense transcript (non-protein coding) [Source:MGI Symbol;Acc:MGI:3052329]
Smad4	5.41	5.9	3.34	0.00159	0.0383	0.438	1.35	SMAD family member 4 [Source:MGI Symbol;Acc:MGI:894293]
Tmem159	3.18	2.57	-3.34	0.00159	0.0383	-0.777	-1.71	transmembrane protein 159 [Source:MGI Symbol;Acc:MGI:1925752]
Doc2g	1.79	0.361	-3.34	0.00159	0.0383	-1.26	-2.39	double C2, gamma [Source:MGI Symbol;Acc:MGI:1926250]
Elmod2	5.03	5.66	3.33	0.0016	0.0384	0.556	1.47	ELMO/CED-12 domain containing 2 [Source:MGI Symbol;Acc:MGI:2445165]
Ccdc85c	3.69	3.19	-3.33	0.0016	0.0384	-0.804	-1.75	coiled-coil domain containing 85C [Source:MGI Symbol;Acc:MGI:3644008]
Cdc34	3.38	2.66	-3.33	0.0016	0.0384	-0.832	-1.78	cell division cycle 34 [Source:MGI Symbol;Acc:MGI:102657]
Spg7	5.93	5.55	-3.34	0.0016	0.0384	-0.397	-1.32	spastic paraplegia 7 homolog (human) [Source:MGI Symbol;Acc:MGI:2385906]
Mapk8	6.13	6.58	3.33	0.00162	0.0385	0.468	1.38	mitogen-activated protein kinase 8 [Source:MGI Symbol;Acc:MGI:1346861]
Zfp958	2.61	3.16	3.33	0.00162	0.0385	0.707	1.63	zinc finger protein 958 [Source:MGI Symbol;Acc:MGI:2385298]
Tmx3	6.49	7.14	3.33	0.00162	0.0385	0.696	1.62	thioredoxin-related transmembrane protein 3 [Source:MGI Symbol;Acc:MGI:2442418]
Tnk2	8.36	7.86	-3.33	0.00162	0.0385	-0.504	-1.42	tyrosine kinase, non-receptor, 2 [Source:MGI Symbol;Acc:MGI:1858308]
Mrpl9	5.28	4.77	-3.33	0.00162	0.0385	-0.53	-1.44	mitochondrial ribosomal protein L9 [Source:MGI Symbol;Acc:MGI:2137211]
Arhgef33	1.83	2.74	3.33	0.00162	0.0385	0.701	1.63	Rho guanine nucleotide exchange factor (GEF) 33 [Source:MGI Symbol;Acc:MGI:2685787]
Phc2	6.2	5.79	-3.33	0.00163	0.0385	-0.465	-1.38	polyhomeotic-like 2 (Drosophila) [Source:MGI Symbol;Acc:MGI:1860454]
Borcs8	4.41	3.73	-3.33	0.00163	0.0385	-0.706	-1.63	BLOC-1 related complex subunit 8 [Source:MGI Symbol;Acc:MGI:1919618]
Fat3	5.98	6.65	3.33	0.00163	0.0385	0.555	1.47	FAT tumor suppressor homolog 3 (Drosophila) [Source:MGI Symbol;Acc:MGI:2444314]
2410021H03Rik	-1.67	0.655	3.33	0.00163	0.0385	2.97	7.84	RIKEN cDNA 2410021H03 gene [Source:MGI Symbol;Acc:MGI:1917000]
Ccdc102a	0.585	-1.48	-3.33	0.00163	0.0385	-2.03	-4.08	coiled-coil domain containing 102A [Source:MGI Symbol;Acc:MGI:2686927]
Atpaf1	5	5.3	3.33	0.00163	0.0385	0.483	1.4	ATP synthase mitochondrial F1 complex assembly factor 1 [Source:MGI Symbol;Acc:MGI:2180560]
Gm10010	-0.762	1.49	3.33	0.00164	0.0385	2.25	4.75	predicted gene 10010 [Source:MGI Symbol;Acc:MGI:3641978]
Gm26823	0.81	2.47	3.33	0.00164	0.0385	1.7	3.24	predicted gene, 26823 [Source:MGI Symbol;Acc:MGI:5477317]
Nek1	5.78	6.29	3.33	0.00164	0.0385	0.481	1.4	NIMA (never in mitosis gene a)-related expressed kinase 1 [Source:MGI Symbol;Acc:MGI:97303]
BC006965	1.22	0.121	-3.33	0.00164	0.0385	-1.13	-2.19	cDNA sequence BC006965 [Source:MGI Symbol;Acc:MGI:2384955]
Ubxn2a	5.24	5.9	3.32	0.00166	0.039	0.633	1.55	UBX domain protein 2A [Source:MGI Symbol;Acc:MGI:2442310]
Podxl	4.39	3.96	-3.32	0.00167	0.039	-0.505	-1.42	podocalyxin-like [Source:MGI Symbol;Acc:MGI:1351317]
Rnf213	3.88	4.59	3.32	0.00167	0.039	0.683	1.61	ring finger protein 213 [Source:MGI Symbol;Acc:MGI:1289196]
Bex2	7.53	6.75	-3.32	0.00167	0.039	-0.787	-1.73	brain expressed X-linked 2 [Source:MGI Symbol;Acc:MGI:1338017]
Son	9	9.45	3.32	0.00168	0.0391	0.527	1.44	Son DNA binding protein [Source:MGI Symbol;Acc:MGI:98353]
Rnpc3	5.45	6.21	3.32	0.00168	0.0391	0.63	1.55	RNA-binding region (RNP1, RRM) containing 3 [Source:MGI Symbol;Acc:MGI:1914475]
Hes5	2.16	1.18	-3.32	0.00169	0.0391	-1.08	-2.12	hairy and enhancer of split 5 (Drosophila) [Source:MGI Symbol;Acc:MGI:104876]
Slc25a47	1.47	0.475	-3.32	0.00169	0.0391	-1.1	-2.14	solute carrier family 25, member 47 [Source:MGI Symbol;Acc:MGI:2144766]
Pik3c2a	5.32	5.95	3.32	0.00169	0.0391	0.677	1.6	phosphatidylinositol 3-kinase, C2 domain containing, alpha polypeptide [Source:MGI Symbol;Acc:MGI:1203729]
Adgra2	3.53	3.04	-3.32	0.00169	0.0391	-0.676	-1.6	adhesion G protein-coupled receptor A2 [Source:MGI Symbol;Acc:MGI:1925810]
Trim33	6.19	6.54	3.31	0.00171	0.0393	0.463	1.38	tripartite motif-containing 33 [Source:MGI Symbol;Acc:MGI:2137357]
Trmt1	6.3	5.94	-3.31	0.00171	0.0393	-0.39	-1.31	tRNA methyltransferase 1 [Source:MGI Symbol;Acc:MGI:1289155]
Tie1	3.25	2.54	-3.31	0.00172	0.0395	-0.746	-1.68	tyrosine kinase with immunoglobulin-like and EGF-like domains 1 [Source:MGI Symbol;Acc:MGI:99906]
Trove2	6.37	7.03	3.31	0.00172	0.0395	0.751	1.68	TROVE domain family, member 2 [Source:MGI Symbol;Acc:MGI:106652]
Ranbp2	6.91	7.51	3.31	0.00172	0.0395	0.649	1.57	RAN binding protein 2 [Source:MGI Symbol;Acc:MGI:894323]
Zkscan2	3.96	5.02	3.31	0.00172	0.0395	0.71	1.64	zinc finger with KRAB and SCAN domains 2 [Source:MGI Symbol;Acc:MGI:2444060]
Nfkbil1	2.69	1.72	-3.31	0.00172	0.0395	-1.07	-2.1	nuclear factor of kappa light polypeptide gene enhancer in B cells inhibitor like 1 [Source:MGI Symbol;Acc:MGI:1340031]
Gramd4	5.71	5.46	-3.31	0.00173	0.0395	-0.328	-1.26	GRAM domain containing 4 [Source:MGI Symbol;Acc:MGI:2676308]
Prkag1	4.92	4.19	-3.31	0.00173	0.0395	-0.669	-1.59	protein kinase, AMP-activated, gamma 1 non-catalytic subunit [Source:MGI Symbol;Acc:MGI:108411]
Zfp770	4.43	4.93	3.31	0.00173	0.0395	0.577	1.49	zinc finger protein 770 [Source:MGI Symbol;Acc:MGI:2445100]
Hexa	5.67	5.21	-3.31	0.00173	0.0395	-0.507	-1.42	hexosaminidase A [Source:MGI Symbol;Acc:MGI:96073]
Cd2ap	5.09	5.68	3.31	0.00173	0.0395	0.637	1.56	CD2-associated protein [Source:MGI Symbol;Acc:MGI:1330281]
Ampd2	6.74	6.36	-3.3	0.00175	0.0397	-0.474	-1.39	adenosine monophosphate deaminase 2 [Source:MGI Symbol;Acc:MGI:88016]
Usp30	5.81	5.45	-3.3	0.00175	0.0397	-0.446	-1.36	ubiquitin specific peptidase 30 [Source:MGI Symbol;Acc:MGI:2140991]
Cd151	5.22	4.72	-3.3	0.00175	0.0397	-0.551	-1.47	CD151 antigen [Source:MGI Symbol;Acc:MGI:1096360]
1810026B05Rik	1.74	2.79	3.3	0.00175	0.0397	1.01	2.02	RIKEN cDNA 1810026B05 gene [Source:MGI Symbol;Acc:MGI:1916420]
Maged1	9.72	9.29	-3.3	0.00176	0.0397	-0.473	-1.39	melanoma antigen, family D, 1 [Source:MGI Symbol;Acc:MGI:1930187]
Sap130	5.45	5.12	-3.3	0.00176	0.0397	-0.394	-1.31	Sin3A associated protein [Source:MGI Symbol;Acc:MGI:1919782]
Cul4b	4.96	5.65	3.3	0.00176	0.0397	0.681	1.6	cullin 4B [Source:MGI Symbol;Acc:MGI:1919834]
A230083G16Rik	1.06	0.142	-3.3	0.00176	0.0397	-1.13	-2.19	RIKEN cDNA A230083G16 gene [Source:MGI Symbol;Acc:MGI:3045289]
Miip	4.83	4.34	-3.3	0.00177	0.0398	-0.511	-1.43	migration and invasion inhibitory protein [Source:MGI Symbol;Acc:MGI:106506]
Vps37a	6.51	7.01	3.3	0.00177	0.0398	0.551	1.46	vacuolar protein sorting 37A (yeast) [Source:MGI Symbol;Acc:MGI:1261835]
Zfp160	3.7	4.31	3.3	0.00177	0.0398	0.637	1.56	zinc finger protein 160 [Source:MGI Symbol;Acc:MGI:108187]
Usp34	7.03	7.77	3.3	0.00178	0.0398	0.723	1.65	ubiquitin specific peptidase 34 [Source:MGI Symbol;Acc:MGI:109473]
4930539J05Rik	-1.25	0.361	3.3	0.00178	0.0398	2.26	4.78	RIKEN cDNA 4930539J05 gene [Source:MGI Symbol;Acc:MGI:1922477]
Ttc7	3.36	2.87	-3.3	0.00178	0.0398	-0.598	-1.51	tetratricopeptide repeat domain 7 [Source:MGI Symbol;Acc:MGI:1920999]
Twf2	3.9	3.08	-3.3	0.00178	0.0398	-0.919	-1.89	twinfilin, actin-binding protein, homolog 2 (Drosophila) [Source:MGI Symbol;Acc:MGI:1346078]
Syt14	4.82	5.29	3.3	0.00179	0.0398	0.483	1.4	synaptotagmin XIV [Source:MGI Symbol;Acc:MGI:2444490]
Dtx2	3.54	2.96	-3.3	0.00179	0.0398	-0.638	-1.56	deltex 2 homolog (Drosophila) [Source:MGI Symbol;Acc:MGI:1921448]
A930029G22Rik	-1.67	-0.147	3.3	0.00179	0.0398	2.01	4.03	RIKEN cDNA A930029G22 gene [Source:MGI Symbol;Acc:MGI:3605039]
Ccnt2	6.53	6.94	3.29	0.0018	0.0398	0.376	1.3	cyclin T2 [Source:MGI Symbol;Acc:MGI:1920199]
Tmem170b	6.25	6.78	3.29	0.0018	0.0398	0.534	1.45	transmembrane protein 170B [Source:MGI Symbol;Acc:MGI:3647046]
Rbm27	5.29	5.79	3.29	0.0018	0.0398	0.571	1.49	RNA binding motif protein 27 [Source:MGI Symbol;Acc:MGI:2147194]
Dnah17	1.85	1.18	-3.29	0.00181	0.0398	-0.864	-1.82	dynein, axonemal, heavy chain 17 [Source:MGI Symbol;Acc:MGI:1917176]
Agrp	3.63	2.42	-3.29	0.00181	0.0398	-1.19	-2.29	agouti related neuropeptide [Source:MGI Symbol;Acc:MGI:892013]
Il1rap	5.2	5.74	3.29	0.00181	0.0398	0.547	1.46	interleukin 1 receptor accessory protein [Source:MGI Symbol;Acc:MGI:104975]
Col9a1	-0.515	-2.32	-3.29	0.00181	0.0398	-1.84	-3.58	collagen, type IX, alpha 1 [Source:MGI Symbol;Acc:MGI:88465]
Phb	5.21	4.65	-3.29	0.00181	0.0398	-0.564	-1.48	prohibitin [Source:MGI Symbol;Acc:MGI:97572]
C1ql2	3.9	2.98	-3.29	0.00181	0.0398	-1.01	-2.02	complement component 1, q subcomponent-like 2 [Source:MGI Symbol;Acc:MGI:3032521]
Kcnma1	3.71	4.95	3.29	0.00182	0.0398	1.36	2.57	potassium large conductance calcium-activated channel, subfamily M, alpha member 1 [Source:MGI Symbol;Acc:MGI:99923]
Gm17567	-2.38	-0.339	3.29	0.00182	0.0398	2.31	4.96	predicted gene, 17567 [Source:MGI Symbol;Acc:MGI:4937201]
Ireb2	7.09	7.46	3.29	0.00182	0.0398	0.428	1.35	iron responsive element binding protein 2 [Source:MGI Symbol;Acc:MGI:1928268]
Kat8	4.08	3.73	-3.29	0.00182	0.0398	-0.454	-1.37	K(lysine) acetyltransferase 8 [Source:MGI Symbol;Acc:MGI:1915023]
Vasn	3.55	3.11	-3.29	0.00182	0.0398	-0.616	-1.53	vasorin [Source:MGI Symbol;Acc:MGI:2177651]
Taf1c	3.65	3.12	-3.29	0.00182	0.0398	-0.603	-1.52	TATA box binding protein (Tbp)-associated factor, RNA polymerase I, C [Source:MGI Symbol;Acc:MGI:109576]
Slitrk4	5.3	5.95	3.29	0.00183	0.0398	0.741	1.67	SLIT and NTRK-like family, member 4 [Source:MGI Symbol;Acc:MGI:2442509]
Itpr2	5.64	5.91	3.29	0.00183	0.0398	0.305	1.24	inositol 1,4,5-triphosphate receptor 2 [Source:MGI Symbol;Acc:MGI:99418]
Whamm	4.59	4.16	-3.29	0.00184	0.0398	-0.527	-1.44	WAS protein homolog associated with actin, golgi membranes and microtubules [Source:MGI Symbol;Acc:MGI:2142282]
Frs3	4.43	3.78	-3.29	0.00184	0.0398	-0.751	-1.68	fibroblast growth factor receptor substrate 3 [Source:MGI Symbol;Acc:MGI:2135965]
Zfx	4.74	5.39	3.29	0.00184	0.0398	0.586	1.5	zinc finger protein X-linked [Source:MGI Symbol;Acc:MGI:99211]
Gm15893	-0.203	1.45	3.29	0.00184	0.0398	1.73	3.32	predicted gene 15893 [Source:MGI Symbol;Acc:MGI:3801832]
Pappa	1.28	2.65	3.29	0.00184	0.0398	1.42	2.68	pregnancy-associated plasma protein A [Source:MGI Symbol;Acc:MGI:97479]
Dcx	4.84	5.42	3.29	0.00184	0.0398	0.599	1.51	doublecortin [Source:MGI Symbol;Acc:MGI:1277171]
Il1rapl1	3.6	4.51	3.29	0.00184	0.0398	0.928	1.9	interleukin 1 receptor accessory protein-like 1 [Source:MGI Symbol;Acc:MGI:2687319]
Urgcp	6.33	6	-3.29	0.00184	0.0398	-0.408	-1.33	upregulator of cell proliferation [Source:MGI Symbol;Acc:MGI:1919296]
Pnmal2	9.6	9.09	-3.28	0.00185	0.0399	-0.546	-1.46	PNMA-like 2 [Source:MGI Symbol;Acc:MGI:3645856]
Serp1	5.16	5.48	3.29	0.00185	0.0399	0.49	1.4	stress-associated endoplasmic reticulum protein 1 [Source:MGI Symbol;Acc:MGI:92638]
Steap3	1.91	1.23	-3.28	0.00186	0.0399	-0.831	-1.78	STEAP family member 3 [Source:MGI Symbol;Acc:MGI:1915678]
Cdc37l1	6.19	6.64	3.28	0.00187	0.0402	0.46	1.38	cell division cycle 37-like 1 [Source:MGI Symbol;Acc:MGI:1914322]
A230046K03Rik	6.2	6.7	3.28	0.00187	0.0402	0.464	1.38	RIKEN cDNA A230046K03 gene [Source:MGI Symbol;Acc:MGI:2441787]
Rps6kl1	5.46	4.96	-3.28	0.00188	0.0403	-0.458	-1.37	ribosomal protein S6 kinase-like 1 [Source:MGI Symbol;Acc:MGI:2443413]
Lpxn	0.259	1.04	3.28	0.00188	0.0403	1.17	2.26	leupaxin [Source:MGI Symbol;Acc:MGI:2147677]
Nbea	7.81	8.43	3.28	0.00189	0.0403	0.587	1.5	neurobeachin [Source:MGI Symbol;Acc:MGI:1347075]
Epm2aip1	8.14	8.77	3.28	0.0019	0.0405	0.584	1.5	EPM2A (laforin) interacting protein 1 [Source:MGI Symbol;Acc:MGI:1925031]
Pura	8.19	8.68	3.28	0.0019	0.0405	0.624	1.54	purine rich element binding protein A [Source:MGI Symbol;Acc:MGI:103079]
Hcn1	3.38	4.28	3.28	0.0019	0.0405	0.776	1.71	hyperpolarization-activated, cyclic nucleotide-gated K+ 1 [Source:MGI Symbol;Acc:MGI:1096392]
Psmb5	4.5	3.68	-3.27	0.00191	0.0405	-0.877	-1.84	proteasome (prosome, macropain) subunit, beta type 5 [Source:MGI Symbol;Acc:MGI:1194513]
Neu2	-0.158	-1.35	-3.27	0.00191	0.0405	-1.69	-3.22	neuraminidase 2 [Source:MGI Symbol;Acc:MGI:1344417]
Sema6b	6.85	6.42	-3.27	0.00191	0.0405	-0.541	-1.46	sema domain, transmembrane domain (TM), and cytoplasmic domain, (semaphorin) 6B [Source:MGI Symbol;Acc:MGI:1202889]
Rnft1	3.91	4.28	3.27	0.00191	0.0405	0.51	1.42	ring finger protein, transmembrane 1 [Source:MGI Symbol;Acc:MGI:1924142]
Ankhd1	5.58	6.02	3.27	0.00192	0.0406	0.457	1.37	ankyrin repeat and KH domain containing 1 [Source:MGI Symbol;Acc:MGI:1921733]
Agl	6.19	6.68	3.27	0.00192	0.0406	0.465	1.38	amylo-1,6-glucosidase, 4-alpha-glucanotransferase [Source:MGI Symbol;Acc:MGI:1924809]
Dnaaf1	0.021	-2	-3.27	0.00192	0.0405	-2.04	-4.12	dynein, axonemal assembly factor 1 [Source:MGI Symbol;Acc:MGI:1915520]
Sos1	6.69	7.32	3.27	0.00193	0.0406	0.604	1.52	son of sevenless homolog 1 (Drosophila) [Source:MGI Symbol;Acc:MGI:98354]
Erp29	6.21	5.45	-3.27	0.00193	0.0406	-0.662	-1.58	endoplasmic reticulum protein 29 [Source:MGI Symbol;Acc:MGI:1914647]
Zswim8	7.62	7.26	-3.27	0.00193	0.0406	-0.456	-1.37	zinc finger SWIM-type containing 8 [Source:MGI Symbol;Acc:MGI:1919156]
Snrnp70	7.57	6.97	-3.27	0.00193	0.0406	-0.508	-1.42	small nuclear ribonucleoprotein 70 (U1) [Source:MGI Symbol;Acc:MGI:98341]
Hsd3b7	3.38	2.96	-3.27	0.00193	0.0406	-0.637	-1.56	hydroxy-delta-5-steroid dehydrogenase, 3 beta- and steroid delta-isomerase 7 [Source:MGI Symbol;Acc:MGI:2141879]
Cyp3a13	1.41	2.44	3.27	0.00194	0.0406	1.05	2.07	cytochrome P450, family 3, subfamily a, polypeptide 13 [Source:MGI Symbol;Acc:MGI:88610]
Pms2	4.66	5.09	3.27	0.00194	0.0406	0.484	1.4	postmeiotic segregation increased 2 (S. cerevisiae) [Source:MGI Symbol;Acc:MGI:104288]
A3galt2	-0.259	-2.17	-3.27	0.00194	0.0406	-1.85	-3.6	alpha 1,3-galactosyltransferase 2 (isoglobotriaosylceramide synthase) [Source:MGI Symbol;Acc:MGI:2685279]
Ankib1	5.77	6.3	3.27	0.00195	0.0407	0.452	1.37	ankyrin repeat and IBR domain containing 1 [Source:MGI Symbol;Acc:MGI:1918047]
Rhbdf1	3.8	3.31	-3.27	0.00195	0.0407	-0.624	-1.54	rhomboid family 1 (Drosophila) [Source:MGI Symbol;Acc:MGI:104328]
Svop	7.06	6.7	-3.27	0.00196	0.0408	-0.469	-1.38	SV2 related protein [Source:MGI Symbol;Acc:MGI:1915916]
D17H6S53E	3.74	2.98	-3.26	0.00197	0.0408	-0.789	-1.73	DNA segment, Chr 17, human D6S53E [Source:MGI Symbol;Acc:MGI:90673]
Ascc3	4.65	5.11	3.26	0.00197	0.0408	0.559	1.47	activating signal cointegrator 1 complex subunit 3 [Source:MGI Symbol;Acc:MGI:1925237]
Trp53inp1	4.75	5.44	3.26	0.00197	0.0408	0.652	1.57	transformation related protein 53 inducible nuclear protein 1 [Source:MGI Symbol;Acc:MGI:1926609]
Nrip1	4.44	5.14	3.26	0.00197	0.0408	0.705	1.63	nuclear receptor interacting protein 1 [Source:MGI Symbol;Acc:MGI:1315213]
Nkx2-4	1.46	0.143	-3.26	0.00197	0.0408	-1.38	-2.6	NK2 homeobox 4 [Source:MGI Symbol;Acc:MGI:97349]
Gm43080	0.206	1.75	3.26	0.00198	0.0408	1.47	2.77	predicted gene 43080 [Source:MGI Symbol;Acc:MGI:5663217]
Dyrk3	3.22	2.76	-3.26	0.00198	0.0408	-0.576	-1.49	dual-specificity tyrosine-(Y)-phosphorylation regulated kinase 3 [Source:MGI Symbol;Acc:MGI:1330300]
Dsel	4.52	5.04	3.26	0.00198	0.0408	0.566	1.48	dermatan sulfate epimerase-like [Source:MGI Symbol;Acc:MGI:2442948]
Inpp4a	8.24	8.62	3.26	0.00198	0.0408	0.452	1.37	inositol polyphosphate-4-phosphatase, type I [Source:MGI Symbol;Acc:MGI:1931123]
Gnai2	7.94	7.47	-3.26	0.00198	0.0408	-0.516	-1.43	guanine nucleotide binding protein (G protein), alpha inhibiting 2 [Source:MGI Symbol;Acc:MGI:95772]
Gm43668	3.66	4.18	3.26	0.00199	0.0408	0.605	1.52	predicted gene 43668 [Source:MGI Symbol;Acc:MGI:5663805]
Zkscan3	5.51	5.98	3.26	0.00199	0.0408	0.518	1.43	zinc finger with KRAB and SCAN domains 3 [Source:MGI Symbol;Acc:MGI:1919989]
Gm12297	-3.02	-1.07	3.26	0.00199	0.0408	2.13	4.39	predicted gene 12297 [Source:MGI Symbol;Acc:MGI:3649682]
Gm43318	-1.23	0.59	3.26	0.00199	0.0408	2.83	7.09	predicted gene 43318 [Source:MGI Symbol;Acc:MGI:5663455]
Pnpt1	4.71	5.22	3.26	0.002	0.0409	0.501	1.41	polyribonucleotide nucleotidyltransferase 1 [Source:MGI Symbol;Acc:MGI:1918951]
Zmym2	6.3	6.8	3.26	0.002	0.0409	0.521	1.44	zinc finger, MYM-type 2 [Source:MGI Symbol;Acc:MGI:1923257]
Rcn3	1.45	-0.0338	-3.26	0.002	0.0409	-1.45	-2.73	reticulocalbin 3, EF-hand calcium binding domain [Source:MGI Symbol;Acc:MGI:1277122]
4833412K13Rik	1.08	2.12	3.26	0.002	0.0409	1.13	2.19	RIKEN cDNA 4833412K13 gene [Source:MGI Symbol;Acc:MGI:1921857]
Loxl3	2.37	1.88	-3.26	0.00201	0.0409	-0.61	-1.53	lysyl oxidase-like 3 [Source:MGI Symbol;Acc:MGI:1337004]
Tenm1	5.28	6.16	3.26	0.00201	0.0409	0.897	1.86	teneurin transmembrane protein 1 [Source:MGI Symbol;Acc:MGI:1345185]
Mllt1	5.04	4.51	-3.26	0.00201	0.0409	-0.603	-1.52	myeloid/lymphoid or mixed-lineage leukemia (trithorax homolog, Drosophila); translocated to, 1 [Source:MGI Symbol;Acc:MGI:1927238]
Mphosph9	4.58	5.33	3.25	0.00203	0.0411	0.551	1.47	M-phase phosphoprotein 9 [Source:MGI Symbol;Acc:MGI:2443138]
Gm26876	0.484	1.49	3.25	0.00203	0.0411	1.22	2.32	predicted gene, 26876 [Source:MGI Symbol;Acc:MGI:5477370]
Mgat4b	5.14	4.72	-3.25	0.00203	0.0411	-0.451	-1.37	mannoside acetylglucosaminyltransferase 4, isoenzyme B [Source:MGI Symbol;Acc:MGI:2143974]
Usp37	5.27	5.63	3.25	0.00204	0.0411	0.429	1.35	ubiquitin specific peptidase 37 [Source:MGI Symbol;Acc:MGI:2442483]
Efcab14	6.17	6.66	3.25	0.00204	0.0412	0.528	1.44	EF-hand calcium binding domain 14 [Source:MGI Symbol;Acc:MGI:2442397]
Tmtc1	6.53	7.01	3.25	0.00204	0.0411	0.466	1.38	transmembrane and tetratricopeptide repeat containing 1 [Source:MGI Symbol;Acc:MGI:3039590]
1810043G02Rik	5.44	5.06	-3.25	0.00204	0.0412	-0.382	-1.3	RIKEN cDNA 1810043G02 gene [Source:MGI Symbol;Acc:MGI:1915134]
Dmtn	7.27	6.88	-3.25	0.00205	0.0412	-0.44	-1.36	dematin actin binding protein [Source:MGI Symbol;Acc:MGI:99670]
Gm29609	1.1	2.07	3.25	0.00205	0.0412	1.12	2.17	predicted gene 29609 [Source:MGI Symbol;Acc:MGI:5580315]
Nup85	5.58	5.14	-3.25	0.00206	0.0412	-0.46	-1.38	nucleoporin 85 [Source:MGI Symbol;Acc:MGI:3046173]
Stat3	6.42	6.23	-3.25	0.00206	0.0412	-0.324	-1.25	signal transducer and activator of transcription 3 [Source:MGI Symbol;Acc:MGI:103038]
Fam172a	5.09	5.55	3.25	0.00206	0.0412	0.45	1.37	family with sequence similarity 172, member A [Source:MGI Symbol;Acc:MGI:1915925]
Ttc27	3.96	3.62	-3.25	0.00206	0.0412	-0.445	-1.36	tetratricopeptide repeat domain 27 [Source:MGI Symbol;Acc:MGI:1921446]
Nrcam	7.61	8.06	3.25	0.00207	0.0412	0.442	1.36	neuronal cell adhesion molecule [Source:MGI Symbol;Acc:MGI:104750]
Arhgap5	5.35	6.29	3.25	0.00207	0.0412	0.892	1.86	Rho GTPase activating protein 5 [Source:MGI Symbol;Acc:MGI:1332637]
Myo9a	6.9	7.54	3.25	0.00207	0.0412	0.597	1.51	myosin IXa [Source:MGI Symbol;Acc:MGI:107735]
Rrp1	7.43	6.81	-3.25	0.00207	0.0412	-0.646	-1.56	ribosomal RNA processing 1 homolog (S. cerevisiae) [Source:MGI Symbol;Acc:MGI:1203500]
Cab39	8.2	8.54	3.25	0.00207	0.0412	0.401	1.32	calcium binding protein 39 [Source:MGI Symbol;Acc:MGI:107438]
Zer1	8.03	7.78	-3.25	0.00207	0.0412	-0.39	-1.31	zyg-11 related, cell cycle regulator [Source:MGI Symbol;Acc:MGI:2442511]
Plekhm1	5.18	4.85	-3.25	0.00207	0.0412	-0.436	-1.35	pleckstrin homology domain containing, family M (with RUN domain) member 1 [Source:MGI Symbol;Acc:MGI:2443207]
Fam35a	2.11	2.9	3.24	0.00208	0.0412	0.846	1.8	family with sequence similarity 35, member A [Source:MGI Symbol;Acc:MGI:1922948]
Atp6ap2	8.73	9.06	3.24	0.00208	0.0412	0.466	1.38	ATPase, H+ transporting, lysosomal accessory protein 2 [Source:MGI Symbol;Acc:MGI:1917745]
Nupl1	4.48	5.08	3.24	0.00209	0.0412	0.472	1.39	nucleoporin like 1 [Source:MGI Symbol;Acc:MGI:1919094]
Nebl	6.61	7.12	3.24	0.0021	0.0412	0.525	1.44	nebulette [Source:MGI Symbol;Acc:MGI:1921353]
Bex1	6.49	5.89	-3.24	0.0021	0.0412	-0.574	-1.49	brain expressed gene 1 [Source:MGI Symbol;Acc:MGI:1328321]
Thbs3	5.3	4.81	-3.24	0.0021	0.0412	-0.596	-1.51	thrombospondin 3 [Source:MGI Symbol;Acc:MGI:98739]
Slc25a40	3.99	4.62	3.24	0.0021	0.0412	0.67	1.59	solute carrier family 25, member 40 [Source:MGI Symbol;Acc:MGI:2442486]
Sox17	2.14	1.57	-3.24	0.00211	0.0412	-0.709	-1.63	SRY (sex determining region Y)-box 17 [Source:MGI Symbol;Acc:MGI:107543]
Sugp1	4.66	4.02	-3.24	0.00211	0.0412	-0.661	-1.58	SURP and G patch domain containing 1 [Source:MGI Symbol;Acc:MGI:1917866]
Fuca1	5.26	4.55	-3.24	0.00211	0.0412	-0.749	-1.68	fucosidase, alpha-L- 1, tissue [Source:MGI Symbol;Acc:MGI:95593]
Dapk3	4.83	4.21	-3.24	0.00211	0.0412	-0.533	-1.45	death-associated protein kinase 3 [Source:MGI Symbol;Acc:MGI:1203520]
Gm26835	-1.77	0.803	3.24	0.00212	0.0412	2.57	5.95	predicted gene, 26835 [Source:MGI Symbol;Acc:MGI:5477329]
Ssbp4	5.94	5.25	-3.24	0.00212	0.0412	-0.74	-1.67	single stranded DNA binding protein 4 [Source:MGI Symbol;Acc:MGI:1924150]
Clasp2	8.07	8.49	3.24	0.00212	0.0412	0.408	1.33	CLIP associating protein 2 [Source:MGI Symbol;Acc:MGI:1923749]
B630005N14Rik	4.91	5.4	3.24	0.00212	0.0412	0.505	1.42	RIKEN cDNA B630005N14 gene [Source:MGI Symbol;Acc:MGI:2141466]
Tspyl5	6.05	6.53	3.24	0.00212	0.0412	0.467	1.38	testis-specific protein, Y-encoded-like 5 [Source:MGI Symbol;Acc:MGI:2442458]
Man2b2	5.21	4.84	-3.24	0.00212	0.0412	-0.461	-1.38	mannosidase 2, alpha B2 [Source:MGI Symbol;Acc:MGI:1195262]
Slc25a16	4.99	5.55	3.24	0.00212	0.0412	0.693	1.62	solute carrier family 25 (mitochondrial carrier, Graves disease autoantigen), member 16 [Source:MGI Symbol;Acc:MGI:1920382]
Fam169a	6.71	7.26	3.24	0.00212	0.0412	0.524	1.44	family with sequence similarity 169, member A [Source:MGI Symbol;Acc:MGI:2444268]
Erich3	5.96	5.65	-3.24	0.00212	0.0412	-0.416	-1.33	glutamate rich 3 [Source:MGI Symbol;Acc:MGI:1919095]
Tubgcp4	4.09	4.69	3.24	0.00213	0.0412	0.577	1.49	tubulin, gamma complex associated protein 4 [Source:MGI Symbol;Acc:MGI:1196293]
Gm37960	-2.07	0.135	3.24	0.00213	0.0412	2.66	6.32	predicted gene, 37960 [Source:MGI Symbol;Acc:MGI:5611188]
Gm38104	0.0599	1.88	3.23	0.00214	0.0412	1.95	3.87	predicted gene, 38104 [Source:MGI Symbol;Acc:MGI:5611332]
Sf3a2	3.77	3.34	-3.23	0.00214	0.0412	-0.609	-1.53	splicing factor 3a, subunit 2 [Source:MGI Symbol;Acc:MGI:104912]
Acaca	6.29	6.66	3.24	0.00214	0.0412	0.421	1.34	acetyl-Coenzyme A carboxylase alpha [Source:MGI Symbol;Acc:MGI:108451]
Ptprn	9.7	9.35	-3.23	0.00214	0.0412	-0.432	-1.35	protein tyrosine phosphatase, receptor type, N [Source:MGI Symbol;Acc:MGI:102765]
Zkscan1	5.78	6.38	3.24	0.00214	0.0412	0.544	1.46	zinc finger with KRAB and SCAN domains 1 [Source:MGI Symbol;Acc:MGI:1921820]
Phb2	4.6	3.98	-3.24	0.00214	0.0412	-0.72	-1.65	prohibitin 2 [Source:MGI Symbol;Acc:MGI:102520]
Peli3	4.85	4.44	-3.23	0.00214	0.0412	-0.587	-1.5	pellino 3 [Source:MGI Symbol;Acc:MGI:1924963]
Fbxl14	4.95	4.48	-3.23	0.00214	0.0412	-0.544	-1.46	F-box and leucine-rich repeat protein 14 [Source:MGI Symbol;Acc:MGI:2141676]
Zbtb38	5.99	6.43	3.23	0.00215	0.0412	0.496	1.41	zinc finger and BTB domain containing 38 [Source:MGI Symbol;Acc:MGI:2442866]
Snord82	2.75	5.32	3.23	0.00215	0.0412	4.3	19.7	small nucleolar RNA, C/D box 82 [Source:MGI Symbol;Acc:MGI:1931502]
Ints2	4.77	5.52	3.23	0.00215	0.0412	0.638	1.56	integrator complex subunit 2 [Source:MGI Symbol;Acc:MGI:1917672]
Ttc14	6.33	7.01	3.23	0.00216	0.0412	0.652	1.57	tetratricopeptide repeat domain 14 [Source:MGI Symbol;Acc:MGI:1914370]
Rab11a	7.14	7.65	3.23	0.00216	0.0412	0.561	1.48	RAB11A, member RAS oncogene family [Source:MGI Symbol;Acc:MGI:1858202]
Ak3	6.9	7.19	3.23	0.00216	0.0412	0.277	1.21	adenylate kinase 3 [Source:MGI Symbol;Acc:MGI:1860835]
Zfp619	2.33	3.08	3.23	0.00216	0.0412	0.798	1.74	zinc finger protein 619 [Source:MGI Symbol;Acc:MGI:1917477]
Etnk1	9.28	9.72	3.23	0.00217	0.0412	0.464	1.38	ethanolamine kinase 1 [Source:MGI Symbol;Acc:MGI:1922570]
Fam208b	4.38	5.24	3.23	0.00217	0.0412	0.778	1.72	family with sequence similarity 208, member B [Source:MGI Symbol;Acc:MGI:2145274]
Evpl	4.39	4.01	-3.23	0.00218	0.0414	-0.521	-1.43	envoplakin [Source:MGI Symbol;Acc:MGI:107507]
Pja1	7.92	7.56	-3.23	0.00218	0.0414	-0.372	-1.29	praja ring finger 1, E3 ubiquitin protein ligase [Source:MGI Symbol;Acc:MGI:1101765]
Kcnj8	1.67	0.746	-3.23	0.00218	0.0414	-1	-2.01	potassium inwardly-rectifying channel, subfamily J, member 8 [Source:MGI Symbol;Acc:MGI:1100508]
Ring1	5.49	4.93	-3.23	0.00218	0.0414	-0.615	-1.53	ring finger protein 1 [Source:MGI Symbol;Acc:MGI:1101770]
Exosc2	4.03	3.61	-3.23	0.00219	0.0414	-0.509	-1.42	exosome component 2 [Source:MGI Symbol;Acc:MGI:2385133]
Izumo4	4.93	4.5	-3.23	0.00219	0.0414	-0.585	-1.5	IZUMO family member 4 [Source:MGI Symbol;Acc:MGI:1918814]
Crmp1	7.09	6.64	-3.23	0.00219	0.0414	-0.577	-1.49	collapsin response mediator protein 1 [Source:MGI Symbol;Acc:MGI:107793]
Lrrc8b	5.54	6.24	3.23	0.00219	0.0414	0.664	1.58	leucine rich repeat containing 8 family, member B [Source:MGI Symbol;Acc:MGI:2141353]
Atf7ip	6.52	6.98	3.23	0.0022	0.0414	0.403	1.32	activating transcription factor 7 interacting protein [Source:MGI Symbol;Acc:MGI:1858965]
Ccdc12	3.34	2.38	-3.22	0.0022	0.0415	-0.99	-1.99	coiled-coil domain containing 12 [Source:MGI Symbol;Acc:MGI:1919904]
Dennd4c	3.91	4.59	3.22	0.00221	0.0415	0.63	1.55	DENN/MADD domain containing 4C [Source:MGI Symbol;Acc:MGI:1914769]
Tle2	5.42	4.81	-3.22	0.00221	0.0415	-0.731	-1.66	transducin-like enhancer of split 2, homolog of Drosophila E(spl) [Source:MGI Symbol;Acc:MGI:104635]
Banf1	3.23	2.35	-3.22	0.00221	0.0415	-0.855	-1.81	barrier to autointegration factor 1 [Source:MGI Symbol;Acc:MGI:1346330]
Tfpt	3.25	2.53	-3.22	0.00221	0.0415	-0.752	-1.68	TCF3 (E2A) fusion partner [Source:MGI Symbol;Acc:MGI:1916964]
Rps24	6.4	5.66	-3.22	0.00221	0.0415	-0.609	-1.52	ribosomal protein S24 [Source:MGI Symbol;Acc:MGI:98147]
Brd2	7.1	6.78	-3.22	0.00222	0.0415	-0.376	-1.3	bromodomain containing 2 [Source:MGI Symbol;Acc:MGI:99495]
Hdgf	7.13	6.68	-3.22	0.00222	0.0415	-0.387	-1.31	hepatoma-derived growth factor [Source:MGI Symbol;Acc:MGI:1194494]
Aph1b	5.22	5.79	3.22	0.00222	0.0415	0.498	1.41	anterior pharynx defective 1b homolog (C. elegans) [Source:MGI Symbol;Acc:MGI:3522097]
Fxyd5	2.91	2.23	-3.22	0.00223	0.0415	-0.701	-1.63	FXYD domain-containing ion transport regulator 5 [Source:MGI Symbol;Acc:MGI:1201785]
Tmem194b	3.31	3.94	3.22	0.00223	0.0416	0.523	1.44	transmembrane protein 194B [Source:MGI Symbol;Acc:MGI:2444113]
A930004J17Rik	1.51	3.03	3.22	0.00224	0.0416	1.27	2.41	RIKEN cDNA A930004J17 gene [Source:MGI Symbol;Acc:MGI:2442442]
Ubr5	7.45	7.96	3.22	0.00224	0.0416	0.43	1.35	ubiquitin protein ligase E3 component n-recognin 5 [Source:MGI Symbol;Acc:MGI:1918040]
9330136K24Rik	0.67	1.65	3.22	0.00224	0.0416	1.09	2.13	RIKEN cDNA 9330136K24 gene [Source:MGI Symbol;Acc:MGI:2442883]
Lrrc16b	7.24	6.79	-3.22	0.00224	0.0416	-0.525	-1.44	leucine rich repeat containing 16B [Source:MGI Symbol;Acc:MGI:2448573]
Myl9	2.37	1.34	-3.22	0.00224	0.0416	-0.976	-1.97	myosin, light polypeptide 9, regulatory [Source:MGI Symbol;Acc:MGI:2138915]
Sergef	4.72	4.2	-3.22	0.00226	0.0418	-0.527	-1.44	secretion regulating guanine nucleotide exchange factor [Source:MGI Symbol;Acc:MGI:1351630]
AI846148	4.79	4.28	-3.22	0.00226	0.0418	-0.445	-1.36	expressed sequence AI846148 [Source:MGI Symbol;Acc:MGI:2147611]
Chd3	8.79	8.51	-3.22	0.00226	0.0418	-0.379	-1.3	chromodomain helicase DNA binding protein 3 [Source:MGI Symbol;Acc:MGI:1344395]
Klhdc1	3.6	4.07	3.21	0.00227	0.0419	0.47	1.39	kelch domain containing 1 [Source:MGI Symbol;Acc:MGI:2672853]
Tdrd12	-1.3	0.307	3.21	0.00227	0.0419	1.84	3.57	tudor domain containing 12 [Source:MGI Symbol;Acc:MGI:1919231]
Cntnap5c	2.77	3.62	3.21	0.00228	0.042	1.1	2.14	contactin associated protein-like 5C [Source:MGI Symbol;Acc:MGI:3646013]
Lifr	6.08	6.64	3.21	0.00229	0.0421	0.534	1.45	leukemia inhibitory factor receptor [Source:MGI Symbol;Acc:MGI:96788]
Iqce	5.95	5.7	-3.21	0.00229	0.0421	-0.349	-1.27	IQ motif containing E [Source:MGI Symbol;Acc:MGI:1921489]
Zbtb41	4.57	5.26	3.21	0.0023	0.0421	0.73	1.66	zinc finger and BTB domain containing 41 homolog [Source:MGI Symbol;Acc:MGI:2444487]
Scd1	8.45	8.86	3.21	0.00231	0.0421	0.448	1.36	stearoyl-Coenzyme A desaturase 1 [Source:MGI Symbol;Acc:MGI:98239]
Rapgef5	4.3	5.07	3.21	0.00231	0.0421	0.672	1.59	Rap guanine nucleotide exchange factor (GEF) 5 [Source:MGI Symbol;Acc:MGI:2444365]
Map3k14	2.51	2.03	-3.21	0.00231	0.0421	-0.729	-1.66	mitogen-activated protein kinase kinase kinase 14 [Source:MGI Symbol;Acc:MGI:1858204]
Col7a1	3.32	2.68	-3.21	0.00231	0.0421	-0.659	-1.58	collagen, type VII, alpha 1 [Source:MGI Symbol;Acc:MGI:88462]
Nabp1	3.51	4.05	3.21	0.00231	0.0421	0.695	1.62	nucleic acid binding protein 1 [Source:MGI Symbol;Acc:MGI:1923258]
Map6	6.58	6.29	-3.21	0.00231	0.0421	-0.398	-1.32	microtubule-associated protein 6 [Source:MGI Symbol;Acc:MGI:1201690]
Naa15	6.61	6.97	3.21	0.00231	0.0421	0.501	1.42	N(alpha)-acetyltransferase 15, NatA auxiliary subunit [Source:MGI Symbol;Acc:MGI:1922088]
D930016D06Rik	4.75	5.22	3.21	0.00232	0.0421	0.589	1.5	RIKEN cDNA D930016D06 gene [Source:MGI Symbol;Acc:MGI:2442700]
Unc5a	6.08	5.58	-3.21	0.00232	0.0421	-0.591	-1.51	unc-5 homolog A (C. elegans) [Source:MGI Symbol;Acc:MGI:894682]
Rac3	5.44	4.62	-3.21	0.00232	0.0421	-0.797	-1.74	RAS-related C3 botulinum substrate 3 [Source:MGI Symbol;Acc:MGI:2180784]
Pclo	7.03	7.61	3.21	0.00233	0.0421	0.576	1.49	piccolo (presynaptic cytomatrix protein) [Source:MGI Symbol;Acc:MGI:1349390]
Tcf3	4.74	4.28	-3.2	0.00233	0.0421	-0.487	-1.4	transcription factor 3 [Source:MGI Symbol;Acc:MGI:98510]
Zkscan8	4.08	4.88	3.21	0.00233	0.0421	0.722	1.65	zinc finger with KRAB and SCAN domains 8 [Source:MGI Symbol;Acc:MGI:1913815]
Sh3glb2	7.34	6.95	-3.21	0.00233	0.0421	-0.429	-1.35	SH3-domain GRB2-like endophilin B2 [Source:MGI Symbol;Acc:MGI:2385131]
Ascc2	5.86	5.6	-3.2	0.00233	0.0421	-0.366	-1.29	activating signal cointegrator 1 complex subunit 2 [Source:MGI Symbol;Acc:MGI:1922702]
Ipo13	6.64	6.18	-3.21	0.00233	0.0421	-0.513	-1.43	importin 13 [Source:MGI Symbol;Acc:MGI:2385205]
Snrpb	5.35	4.97	-3.21	0.00233	0.0421	-0.374	-1.3	small nuclear ribonucleoprotein B [Source:MGI Symbol;Acc:MGI:98342]
Gm20605	1.08	-0.0774	-3.21	0.00233	0.0421	-1.24	-2.36	predicted gene 20605 [Source:MGI Symbol;Acc:MGI:5306917]
BC029722	5.16	4.6	-3.2	0.00235	0.0422	-0.672	-1.59	cDNA sequence BC029722 [Source:MGI Symbol;Acc:MGI:3584273]
Pik3cd	4.69	4.27	-3.2	0.00235	0.0422	-0.552	-1.47	phosphatidylinositol 3-kinase catalytic delta polypeptide [Source:MGI Symbol;Acc:MGI:1098211]
Zfp945	4.15	4.73	3.2	0.00236	0.0423	0.55	1.46	zinc finger protein 945 [Source:MGI Symbol;Acc:MGI:2445132]
Safb	7.11	6.63	-3.2	0.00237	0.0425	-0.418	-1.34	scaffold attachment factor B [Source:MGI Symbol;Acc:MGI:2146974]
Isyna1	4.95	4.45	-3.2	0.00237	0.0425	-0.669	-1.59	myo-inositol 1-phosphate synthase A1 [Source:MGI Symbol;Acc:MGI:1919030]
BC022687	3.92	3.35	-3.2	0.00238	0.0426	-0.594	-1.51	cDNA sequence BC022687 [Source:MGI Symbol;Acc:MGI:2443738]
Mzf1	3.1	2.74	-3.2	0.00238	0.0426	-0.709	-1.64	myeloid zinc finger 1 [Source:MGI Symbol;Acc:MGI:107457]
Slc9a7	2.29	3.73	3.2	0.00239	0.0426	1.56	2.94	solute carrier family 9 (sodium/hydrogen exchanger), member 7 [Source:MGI Symbol;Acc:MGI:2444530]
Akap11	7.85	8.47	3.2	0.00239	0.0426	0.604	1.52	A kinase (PRKA) anchor protein 11 [Source:MGI Symbol;Acc:MGI:2684060]
Furin	4.96	4.62	-3.2	0.00239	0.0426	-0.439	-1.36	furin (paired basic amino acid cleaving enzyme) [Source:MGI Symbol;Acc:MGI:97513]
Rbm10	5.47	4.98	-3.2	0.00239	0.0426	-0.516	-1.43	RNA binding motif protein 10 [Source:MGI Symbol;Acc:MGI:2384310]
Ankrd34c	3.84	4.3	3.2	0.0024	0.0426	0.596	1.51	ankyrin repeat domain 34C [Source:MGI Symbol;Acc:MGI:2685617]
Ash1l	7.16	7.65	3.2	0.0024	0.0426	0.423	1.34	ash1 (absent, small, or homeotic)-like (Drosophila) [Source:MGI Symbol;Acc:MGI:2183158]
Myo9b	6.65	6.38	-3.2	0.0024	0.0426	-0.389	-1.31	myosin IXb [Source:MGI Symbol;Acc:MGI:106624]
Afap1l2	3.17	2.77	-3.2	0.0024	0.0426	-0.635	-1.55	actin filament associated protein 1-like 2 [Source:MGI Symbol;Acc:MGI:2147658]
Tceal5	4.18	3.45	-3.19	0.00241	0.0426	-0.784	-1.72	transcription elongation factor A (SII)-like 5 [Source:MGI Symbol;Acc:MGI:3036236]
Chpf	6.43	5.96	-3.19	0.00241	0.0426	-0.504	-1.42	chondroitin polymerizing factor [Source:MGI Symbol;Acc:MGI:106576]
Usp15	6.11	6.58	3.19	0.00241	0.0426	0.466	1.38	ubiquitin specific peptidase 15 [Source:MGI Symbol;Acc:MGI:101857]
Bag4	6.21	6.65	3.19	0.00242	0.0426	0.451	1.37	BCL2-associated athanogene 4 [Source:MGI Symbol;Acc:MGI:1914634]
Gm43263	-0.169	-1.85	-3.19	0.00242	0.0426	-1.7	-3.24	predicted gene 43263 [Source:MGI Symbol;Acc:MGI:5663400]
Tmem132a	6.25	5.74	-3.19	0.00242	0.0426	-0.64	-1.56	transmembrane protein 132A [Source:MGI Symbol;Acc:MGI:2147810]
Gm37011	-1.13	0.177	3.19	0.00243	0.0426	2.35	5.1	predicted gene, 37011 [Source:MGI Symbol;Acc:MGI:5610239]
Clcn5	5.52	6.14	3.19	0.00243	0.0426	0.634	1.55	chloride channel, voltage-sensitive 5 [Source:MGI Symbol;Acc:MGI:99486]
Sema3d	3	3.82	3.19	0.00243	0.0426	0.879	1.84	sema domain, immunoglobulin domain (Ig), short basic domain, secreted, (semaphorin) 3D [Source:MGI Symbol;Acc:MGI:1860118]
Pex5	6.31	5.96	-3.19	0.00243	0.0426	-0.414	-1.33	peroxisomal biogenesis factor 5 [Source:MGI Symbol;Acc:MGI:1098808]
Gm12316	0.332	-0.875	-3.19	0.00243	0.0426	-1.45	-2.73	predicted gene 12316 [Source:MGI Symbol;Acc:MGI:3651760]
Fam43a	3.94	3.44	-3.19	0.00243	0.0426	-0.649	-1.57	family with sequence similarity 43, member A [Source:MGI Symbol;Acc:MGI:2676309]
Gm43379	1.81	2.43	3.19	0.00244	0.0426	0.749	1.68	predicted gene 43379 [Source:MGI Symbol;Acc:MGI:5663516]
Caskin1	7.51	7.19	-3.19	0.00244	0.0426	-0.467	-1.38	CASK interacting protein 1 [Source:MGI Symbol;Acc:MGI:2442952]
Gtf2a2	4.47	4.93	3.19	0.00244	0.0426	0.508	1.42	general transcription factor II A, 2 [Source:MGI Symbol;Acc:MGI:1933289]
Pdpr	4.07	5.02	3.19	0.00244	0.0426	0.685	1.61	pyruvate dehydrogenase phosphatase regulatory subunit [Source:MGI Symbol;Acc:MGI:2442188]
Gm340	0.861	2.1	3.19	0.00244	0.0426	1.48	2.78	predicted gene 340 [Source:MGI Symbol;Acc:MGI:2685186]
Ppp1r8	5.3	4.87	-3.19	0.00245	0.0426	-0.446	-1.36	protein phosphatase 1, regulatory (inhibitor) subunit 8 [Source:MGI Symbol;Acc:MGI:2140494]
Palm2	3.1	4.33	3.19	0.00245	0.0426	0.982	1.98	paralemmin 2 [Source:MGI Symbol;Acc:MGI:1934601]
Pcbp4	6.51	5.71	-3.19	0.00245	0.0426	-0.826	-1.77	poly(rC) binding protein 4 [Source:MGI Symbol;Acc:MGI:1890471]
Ict1	6.28	6.96	3.19	0.00245	0.0426	1.06	2.09	immature colon carcinoma transcript 1 [Source:MGI Symbol;Acc:MGI:1915822]
Ddx26b	6.13	6.61	3.19	0.00246	0.0426	0.433	1.35	DEAD/H (Asp-Glu-Ala-Asp/His) box polypeptide 26B [Source:MGI Symbol;Acc:MGI:2442593]
Col16a1	5.8	5.24	-3.19	0.00246	0.0426	-0.706	-1.63	collagen, type XVI, alpha 1 [Source:MGI Symbol;Acc:MGI:1095396]
Zfp280d	5.24	5.81	3.18	0.00247	0.0429	0.565	1.48	zinc finger protein 280D [Source:MGI Symbol;Acc:MGI:2384583]
Ythdc2	4.79	5.31	3.18	0.00248	0.043	0.489	1.4	YTH domain containing 2 [Source:MGI Symbol;Acc:MGI:2448561]
Zfp369	3.2	3.97	3.18	0.00249	0.043	1	2	zinc finger protein 369 [Source:MGI Symbol;Acc:MGI:2176229]
Zfp869	4.27	4.96	3.18	0.00249	0.043	0.561	1.48	zinc finger protein 869 [Source:MGI Symbol;Acc:MGI:1914119]
Proser3	2.56	2.09	-3.18	0.0025	0.043	-0.637	-1.56	proline and serine rich 3 [Source:MGI Symbol;Acc:MGI:2681861]
Cav2	4.45	5.14	3.18	0.0025	0.043	0.717	1.64	caveolin 2 [Source:MGI Symbol;Acc:MGI:107571]
Nlgn2	8.28	7.95	-3.18	0.0025	0.043	-0.433	-1.35	neuroligin 2 [Source:MGI Symbol;Acc:MGI:2681835]
Smarcd3	4.76	4.33	-3.18	0.0025	0.043	-0.655	-1.58	SWI/SNF related, matrix associated, actin dependent regulator of chromatin, subfamily d, member 3 [Source:MGI Symbol;Acc:MGI:1914243]
Nkain2	4.65	5.19	3.18	0.0025	0.043	0.523	1.44	Na+/K+ transporting ATPase interacting 2 [Source:MGI Symbol;Acc:MGI:1923447]
Akr7a5	4.28	3.66	-3.18	0.00251	0.043	-0.658	-1.58	aldo-keto reductase family 7, member A5 (aflatoxin aldehyde reductase) [Source:MGI Symbol;Acc:MGI:107796]
Gapvd1	7.2	7.52	3.18	0.00251	0.043	0.299	1.23	GTPase activating protein and VPS9 domains 1 [Source:MGI Symbol;Acc:MGI:1913941]
Zfp459	-0.518	0.714	3.18	0.00252	0.0432	1.48	2.79	zinc finger protein 459 [Source:MGI Symbol;Acc:MGI:3040701]
Gpr107	5.95	5.69	-3.18	0.00252	0.0433	-0.296	-1.23	G protein-coupled receptor 107 [Source:MGI Symbol;Acc:MGI:2139054]
Phf23	5.03	4.63	-3.18	0.00253	0.0433	-0.366	-1.29	PHD finger protein 23 [Source:MGI Symbol;Acc:MGI:1925496]
Accsl	-0.421	-1.75	-3.18	0.00253	0.0433	-1.82	-3.53	1-aminocyclopropane-1-carboxylate synthase (non-functional)-like [Source:MGI Symbol;Acc:MGI:3584519]
Uba3	6.27	6.62	3.18	0.00254	0.0433	0.422	1.34	ubiquitin-like modifier activating enzyme 3 [Source:MGI Symbol;Acc:MGI:1341217]
Bmpr1a	6.08	6.62	3.18	0.00254	0.0433	0.489	1.4	bone morphogenetic protein receptor, type 1A [Source:MGI Symbol;Acc:MGI:1338938]
Ift122	5.25	4.91	-3.18	0.00254	0.0433	-0.421	-1.34	intraflagellar transport 122 [Source:MGI Symbol;Acc:MGI:1932386]
Spef1	2.75	2.07	-3.17	0.00255	0.0433	-0.735	-1.66	sperm flagellar 1 [Source:MGI Symbol;Acc:MGI:3513546]
Pdcl	5.13	5.59	3.17	0.00255	0.0433	0.542	1.46	phosducin-like [Source:MGI Symbol;Acc:MGI:1914716]
Foxp4	5.84	5.46	-3.17	0.00255	0.0433	-0.403	-1.32	forkhead box P4 [Source:MGI Symbol;Acc:MGI:1921373]
Gm37276	0.989	1.68	3.17	0.00255	0.0433	0.952	1.93	predicted gene, 37276 [Source:MGI Symbol;Acc:MGI:5610504]
Slc24a2	7.33	7.96	3.17	0.00256	0.0433	0.747	1.68	solute carrier family 24 (sodium/potassium/calcium exchanger), member 2 [Source:MGI Symbol;Acc:MGI:1923626]
Zfp719	4.11	4.53	3.17	0.00256	0.0433	0.526	1.44	zinc finger protein 719 [Source:MGI Symbol;Acc:MGI:2444708]
Zufsp	2.94	3.49	3.17	0.00256	0.0433	0.642	1.56	zinc finger with UFM1-specific peptidase domain [Source:MGI Symbol;Acc:MGI:1919830]
Gm37694	0.555	1.33	3.17	0.00257	0.0434	1.61	3.05	predicted gene, 37694 [Source:MGI Symbol;Acc:MGI:5610922]
Gm2155	-1.43	-0.157	3.17	0.00257	0.0434	1.86	3.64	predicted gene 2155 [Source:MGI Symbol;Acc:MGI:3780324]
Lamb2	5.52	4.93	-3.17	0.00257	0.0434	-0.599	-1.51	laminin, beta 2 [Source:MGI Symbol;Acc:MGI:99916]
Sgsm2	7.03	6.68	-3.17	0.00258	0.0436	-0.508	-1.42	small G protein signaling modulator 2 [Source:MGI Symbol;Acc:MGI:2144695]
Pdia6	7.2	6.81	-3.17	0.00259	0.0437	-0.411	-1.33	protein disulfide isomerase associated 6 [Source:MGI Symbol;Acc:MGI:1919103]
Uggt2	5.49	6.12	3.17	0.0026	0.0438	0.55	1.46	UDP-glucose glycoprotein glucosyltransferase 2 [Source:MGI Symbol;Acc:MGI:1913685]
Scamp1	8.24	8.61	3.17	0.0026	0.0438	0.391	1.31	secretory carrier membrane protein 1 [Source:MGI Symbol;Acc:MGI:1349480]
Qk	8.12	8.7	3.17	0.00261	0.0438	0.587	1.5	quaking [Source:MGI Symbol;Acc:MGI:97837]
Tmem68	5.22	5.74	3.17	0.00261	0.0439	0.605	1.52	transmembrane protein 68 [Source:MGI Symbol;Acc:MGI:1919348]
Zdhhc1	5.67	5.26	-3.17	0.00262	0.0439	-0.484	-1.4	zinc finger, DHHC domain containing 1 [Source:MGI Symbol;Acc:MGI:1918046]
Cnot6l	5.71	6.32	3.16	0.00262	0.0439	0.605	1.52	CCR4-NOT transcription complex, subunit 6-like [Source:MGI Symbol;Acc:MGI:2443154]
H2-Q6	1.06	-0.45	-3.16	0.00262	0.0439	-1.64	-3.11	histocompatibility 2, Q region locus 6 [Source:MGI Symbol;Acc:MGI:95935]
Tes	1.19	1.84	3.16	0.00263	0.044	0.925	1.9	testis derived transcript [Source:MGI Symbol;Acc:MGI:105081]
Nsun6	2.75	3.24	3.16	0.00263	0.044	0.647	1.57	NOL1/NOP2/Sun domain family member 6 [Source:MGI Symbol;Acc:MGI:1921705]
Vps72	4.39	3.79	-3.16	0.00264	0.044	-0.709	-1.63	vacuolar protein sorting 72 (yeast) [Source:MGI Symbol;Acc:MGI:1202305]
Lss	5.42	5.82	3.16	0.00264	0.044	0.345	1.27	lanosterol synthase [Source:MGI Symbol;Acc:MGI:1336155]
1700080N15Rik	-0.824	0.985	3.16	0.00265	0.044	1.96	3.88	RIKEN cDNA 1700080N15 gene [Source:MGI Symbol;Acc:MGI:1920739]
Pcdh15	4.93	5.49	3.16	0.00265	0.044	0.564	1.48	protocadherin 15 [Source:MGI Symbol;Acc:MGI:1891428]
Matk	7.13	6.28	-3.16	0.00265	0.0441	-0.813	-1.76	megakaryocyte-associated tyrosine kinase [Source:MGI Symbol;Acc:MGI:99259]
Actr2	8.2	8.63	3.16	0.00266	0.0441	0.478	1.39	ARP2 actin-related protein 2 [Source:MGI Symbol;Acc:MGI:1913963]
Zfp868	4.12	4.54	3.16	0.00266	0.0441	0.441	1.36	zinc finger protein 868 [Source:MGI Symbol;Acc:MGI:2142546]
Tmem263	5.49	5.96	3.16	0.00266	0.0441	0.53	1.44	transmembrane protein 263 [Source:MGI Symbol;Acc:MGI:2143652]
Gm20387	0.158	1.43	3.16	0.00266	0.0441	1.28	2.43	predicted gene 20387 [Source:MGI Symbol;Acc:MGI:5141852]
Gm37123	1.05	-0.0992	-3.16	0.00266	0.0441	-1.18	-2.27	predicted gene, 37123 [Source:MGI Symbol;Acc:MGI:5610351]
Ptges	1.62	0.902	-3.16	0.00267	0.0441	-0.917	-1.89	prostaglandin E synthase [Source:MGI Symbol;Acc:MGI:1927593]
Fsd1	4.33	3.72	-3.16	0.00267	0.0441	-0.792	-1.73	fibronectin type 3 and SPRY domain-containing protein [Source:MGI Symbol;Acc:MGI:1934858]
Anapc5	8.41	8.17	-3.16	0.00268	0.0441	-0.291	-1.22	anaphase-promoting complex subunit 5 [Source:MGI Symbol;Acc:MGI:1929722]
Tead3	1.94	1.15	-3.16	0.00268	0.0441	-0.92	-1.89	TEA domain family member 3 [Source:MGI Symbol;Acc:MGI:109241]
Impad1	7.46	8.03	3.16	0.00269	0.0443	0.585	1.5	inositol monophosphatase domain containing 1 [Source:MGI Symbol;Acc:MGI:1915720]
Maf1	5.31	4.7	-3.16	0.00269	0.0443	-0.687	-1.61	MAF1 homolog (S. cerevisiae) [Source:MGI Symbol;Acc:MGI:1916127]
Ppp1r12c	6.98	6.43	-3.15	0.0027	0.0443	-0.551	-1.47	protein phosphatase 1, regulatory (inhibitor) subunit 12C [Source:MGI Symbol;Acc:MGI:1924258]
Scaf11	6.12	6.49	3.15	0.0027	0.0443	0.395	1.32	SR-related CTD-associated factor 11 [Source:MGI Symbol;Acc:MGI:1919443]
9830147E19Rik	1.38	1.93	3.15	0.00271	0.0444	0.641	1.56	RIKEN cDNA 9830147E19 gene [Source:MGI Symbol;Acc:MGI:3036263]
Fbxw17	4.02	3.58	-3.15	0.00271	0.0444	-0.481	-1.4	F-box and WD-40 domain protein 17 [Source:MGI Symbol;Acc:MGI:1923584]
Ube2d1	6.26	6.67	3.15	0.00271	0.0444	0.511	1.43	ubiquitin-conjugating enzyme E2D 1 [Source:MGI Symbol;Acc:MGI:2384911]
Stt3a	6.29	6.68	3.15	0.00271	0.0444	0.395	1.31	STT3, subunit of the oligosaccharyltransferase complex, homolog A (S. cerevisiae) [Source:MGI Symbol;Acc:MGI:105124]
Zfp653	4.26	3.64	-3.15	0.00271	0.0444	-0.583	-1.5	zinc finger protein 653 [Source:MGI Symbol;Acc:MGI:2442362]
Ucp3	3.39	2.89	-3.15	0.00272	0.0444	-0.575	-1.49	uncoupling protein 3 (mitochondrial, proton carrier) [Source:MGI Symbol;Acc:MGI:1099787]
Zfp729a	2.82	3.29	3.15	0.00273	0.0444	0.581	1.5	zinc finger protein 729a [Source:MGI Symbol;Acc:MGI:3036250]
Plch1	4.4	5.04	3.15	0.00273	0.0445	0.581	1.5	phospholipase C, eta 1 [Source:MGI Symbol;Acc:MGI:2683547]
Col27a1	3.65	3	-3.15	0.00273	0.0444	-0.729	-1.66	collagen, type XXVII, alpha 1 [Source:MGI Symbol;Acc:MGI:2672118]
Ccdc42	0.323	-1.11	-3.15	0.00273	0.0445	-1.77	-3.41	coiled-coil domain containing 42 [Source:MGI Symbol;Acc:MGI:3045254]
Tchp	4.29	3.86	-3.15	0.00274	0.0445	-0.416	-1.33	trichoplein, keratin filament binding [Source:MGI Symbol;Acc:MGI:1925082]
Srf	4.53	4.1	-3.15	0.00274	0.0445	-0.54	-1.45	serum response factor [Source:MGI Symbol;Acc:MGI:106658]
Pusl1	3.91	3.38	-3.15	0.00274	0.0445	-0.671	-1.59	pseudouridylate synthase-like 1 [Source:MGI Symbol;Acc:MGI:3047787]
Slc16a11	4.37	3.86	-3.15	0.00274	0.0445	-0.623	-1.54	solute carrier family 16 (monocarboxylic acid transporters), member 11 [Source:MGI Symbol;Acc:MGI:2663709]
Arhgef40	6.47	6.12	-3.15	0.00275	0.0445	-0.434	-1.35	Rho guanine nucleotide exchange factor (GEF) 40 [Source:MGI Symbol;Acc:MGI:2685515]
9130230N09Rik	-0.617	0.626	3.15	0.00275	0.0445	1.45	2.73	RIKEN cDNA 9130230N09 gene [Source:MGI Symbol;Acc:MGI:1924921]
Gm26973	0.136	1.05	3.15	0.00275	0.0445	1.39	2.62	predicted gene, 26973 [Source:MGI Symbol;Acc:MGI:5504088]
Ikzf2	3.36	4.01	3.15	0.00276	0.0445	0.637	1.56	IKAROS family zinc finger 2 [Source:MGI Symbol;Acc:MGI:1342541]
Hcn3	5.23	4.77	-3.15	0.00276	0.0445	-0.592	-1.51	hyperpolarization-activated, cyclic nucleotide-gated K+ 3 [Source:MGI Symbol;Acc:MGI:1298211]
Gsap	2.99	3.51	3.15	0.00276	0.0445	0.487	1.4	gamma-secretase activating protein [Source:MGI Symbol;Acc:MGI:2442259]
Gsk3b	8.42	8.95	3.15	0.00277	0.0445	0.523	1.44	glycogen synthase kinase 3 beta [Source:MGI Symbol;Acc:MGI:1861437]
Abcf1	6.04	5.54	-3.15	0.00277	0.0445	-0.522	-1.44	ATP-binding cassette, sub-family F (GCN20), member 1 [Source:MGI Symbol;Acc:MGI:1351658]
Gpcpd1	6.67	7.1	3.14	0.00278	0.0448	0.495	1.41	glycerophosphocholine phosphodiesterase GDE1 homolog (S. cerevisiae) [Source:MGI Symbol;Acc:MGI:104898]
Fxr2	7.14	6.75	-3.14	0.00279	0.0448	-0.397	-1.32	fragile X mental retardation, autosomal homolog 2 [Source:MGI Symbol;Acc:MGI:1346074]
Mical1	4.18	3.67	-3.14	0.00279	0.0449	-0.619	-1.54	microtubule associated monooxygenase, calponin and LIM domain containing 1 [Source:MGI Symbol;Acc:MGI:2385847]
Megf9	7.04	7.52	3.14	0.0028	0.0449	0.473	1.39	multiple EGF-like-domains 9 [Source:MGI Symbol;Acc:MGI:1918264]
Pdpk1	7.37	7.87	3.14	0.0028	0.0449	0.444	1.36	3-phosphoinositide dependent protein kinase 1 [Source:MGI Symbol;Acc:MGI:1338068]
Nfat5	6.56	7.24	3.14	0.00281	0.045	0.61	1.53	nuclear factor of activated T cells 5 [Source:MGI Symbol;Acc:MGI:1859333]
Gm42732	4.99	5.54	3.14	0.00281	0.0449	0.615	1.53	predicted gene 42732 [Source:MGI Symbol;Acc:MGI:5662869]
Xrn1	5.74	6.24	3.14	0.00282	0.045	0.509	1.42	5'-3' exoribonuclease 1 [Source:MGI Symbol;Acc:MGI:891964]
Dcun1d1	5.43	5.88	3.14	0.00282	0.045	0.539	1.45	DCN1, defective in cullin neddylation 1, domain containing 1 (S. cerevisiae) [Source:MGI Symbol;Acc:MGI:2150386]
Stard3	4.19	3.59	-3.14	0.00282	0.0451	-0.654	-1.57	START domain containing 3 [Source:MGI Symbol;Acc:MGI:1929618]
Samd11	2.3	1.75	-3.14	0.00283	0.0451	-0.904	-1.87	sterile alpha motif domain containing 11 [Source:MGI Symbol;Acc:MGI:2446220]
1500009C09Rik	7.18	6.68	-3.14	0.00283	0.0451	-0.531	-1.44	RIKEN cDNA 1500009C09 gene [Source:MGI Symbol;Acc:MGI:1923755]
Tspan12	4.98	5.44	3.14	0.00284	0.0452	0.535	1.45	tetraspanin 12 [Source:MGI Symbol;Acc:MGI:1889818]
Sgip1	7.08	7.55	3.14	0.00284	0.0452	0.424	1.34	SH3-domain GRB2-like (endophilin) interacting protein 1 [Source:MGI Symbol;Acc:MGI:1920344]
Fam220a	4.81	4.48	-3.13	0.00285	0.0453	-0.397	-1.32	family with sequence similarity 220, member A [Source:MGI Symbol;Acc:MGI:1914488]
Yes1	3.7	4.32	3.14	0.00285	0.0452	0.678	1.6	Yamaguchi sarcoma viral (v-yes) oncogene homolog 1 [Source:MGI Symbol;Acc:MGI:99147]
Pex5l	6.1	6.64	3.13	0.00286	0.0454	0.492	1.41	peroxisomal biogenesis factor 5-like [Source:MGI Symbol;Acc:MGI:1916672]
Rsbn1l	4.5	4.95	3.13	0.00287	0.0455	0.564	1.48	round spermatid basic protein 1-like [Source:MGI Symbol;Acc:MGI:3036237]
Gm26981	0.88	1.91	3.13	0.00287	0.0454	1.11	2.16	predicted gene, 26981 [Source:MGI Symbol;Acc:MGI:5504096]
Slc29a3	4.07	4.57	3.13	0.00288	0.0455	0.473	1.39	solute carrier family 29 (nucleoside transporters), member 3 [Source:MGI Symbol;Acc:MGI:1918529]
Lemd2	5.04	4.52	-3.13	0.00289	0.0456	-0.516	-1.43	LEM domain containing 2 [Source:MGI Symbol;Acc:MGI:2385045]
Noc2l	6.11	5.64	-3.13	0.00289	0.0456	-0.505	-1.42	nucleolar complex associated 2 homolog (S. cerevisiae) [Source:MGI Symbol;Acc:MGI:1931051]
Pgs1	5.48	5.09	-3.13	0.00289	0.0456	-0.474	-1.39	phosphatidylglycerophosphate synthase 1 [Source:MGI Symbol;Acc:MGI:1921701]
Ercc6	5.06	5.55	3.13	0.00289	0.0456	0.447	1.36	excision repair cross-complementing rodent repair deficiency, complementation group 6 [Source:MGI Symbol;Acc:MGI:1100494]
Zfp560	3.28	3.69	3.13	0.0029	0.0456	0.532	1.45	zinc finger protein 560 [Source:MGI Symbol;Acc:MGI:1915280]
Pin1	5.26	4.76	-3.13	0.00291	0.0457	-0.551	-1.47	protein (peptidyl-prolyl cis/trans isomerase) NIMA-interacting 1 [Source:MGI Symbol;Acc:MGI:1346036]
Obsl1	3.99	3.58	-3.13	0.00292	0.0458	-0.665	-1.59	obscurin-like 1 [Source:MGI Symbol;Acc:MGI:2138628]
Anapc1	6.82	7.27	3.12	0.00294	0.046	0.387	1.31	anaphase promoting complex subunit 1 [Source:MGI Symbol;Acc:MGI:103097]
Wnk1	7.74	8.2	3.12	0.00294	0.046	0.473	1.39	WNK lysine deficient protein kinase 1 [Source:MGI Symbol;Acc:MGI:2442092]
Gm42717	-0.762	0.554	3.12	0.00294	0.046	1.79	3.47	predicted gene 42717 [Source:MGI Symbol;Acc:MGI:5662854]
Crocc	6.84	6.42	-3.12	0.00294	0.046	-0.554	-1.47	ciliary rootlet coiled-coil, rootletin [Source:MGI Symbol;Acc:MGI:3529431]
Arhgef1	6.83	6.54	-3.12	0.00294	0.046	-0.419	-1.34	Rho guanine nucleotide exchange factor (GEF) 1 [Source:MGI Symbol;Acc:MGI:1353510]
Clstn1	9.6	9.33	-3.12	0.00295	0.0461	-0.413	-1.33	calsyntenin 1 [Source:MGI Symbol;Acc:MGI:1929895]
Serpina3n	5.9	5.54	-3.12	0.00296	0.0462	-0.545	-1.46	serine (or cysteine) peptidase inhibitor, clade A, member 3N [Source:MGI Symbol;Acc:MGI:105045]
Tmem180	5.14	4.59	-3.12	0.00296	0.0462	-0.577	-1.49	transmembrane protein 180 [Source:MGI Symbol;Acc:MGI:1922396]
Mvb12b	7.13	6.81	-3.12	0.00296	0.0462	-0.42	-1.34	multivesicular body subunit 12B [Source:MGI Symbol;Acc:MGI:1919793]
B230354K17Rik	3.72	4.14	3.12	0.00297	0.0462	0.475	1.39	RIKEN cDNA B230354K17 gene [Source:MGI Symbol;Acc:MGI:2443272]
Arpc1b	3.15	2.37	-3.12	0.00297	0.0462	-0.782	-1.72	actin related protein 2/3 complex, subunit 1B [Source:MGI Symbol;Acc:MGI:1343142]
Mapk8ip3	8.83	8.58	-3.12	0.00297	0.0462	-0.368	-1.29	mitogen-activated protein kinase 8 interacting protein 3 [Source:MGI Symbol;Acc:MGI:1353598]
Aspa	4.1	4.71	3.12	0.00298	0.0462	0.823	1.77	aspartoacylase [Source:MGI Symbol;Acc:MGI:87914]
Uty	3.85	4.52	3.12	0.00298	0.0462	0.763	1.7	ubiquitously transcribed tetratricopeptide repeat gene, Y chromosome [Source:MGI Symbol;Acc:MGI:894810]
Clk3	5.34	4.93	-3.12	0.00299	0.0463	-0.438	-1.36	CDC-like kinase 3 [Source:MGI Symbol;Acc:MGI:1098670]
Arhgap33	5.68	5.36	-3.12	0.00299	0.0463	-0.561	-1.48	Rho GTPase activating protein 33 [Source:MGI Symbol;Acc:MGI:2673998]
Pde7a	4.96	5.35	3.12	0.003	0.0464	0.365	1.29	phosphodiesterase 7A [Source:MGI Symbol;Acc:MGI:1202402]
Nosip	5.39	4.79	-3.12	0.003	0.0464	-0.611	-1.53	nitric oxide synthase interacting protein [Source:MGI Symbol;Acc:MGI:1913644]
Med12l	5.61	6.4	3.12	0.003	0.0464	0.584	1.5	mediator complex subunit 12-like [Source:MGI Symbol;Acc:MGI:2139916]
Dvl1	6.38	5.93	-3.12	0.00302	0.0466	-0.519	-1.43	dishevelled, dsh homolog 1 (Drosophila) [Source:MGI Symbol;Acc:MGI:94941]
Gm21846	1.02	2.11	3.11	0.00302	0.0466	1.41	2.66	predicted gene, 21846 [Source:MGI Symbol;Acc:MGI:5434010]
Sc5d	5.29	5.83	3.11	0.00302	0.0466	0.447	1.36	sterol-C5-desaturase (fungal ERG3, delta-5-desaturase) homolog (S. cerevisae) [Source:MGI Symbol;Acc:MGI:1353611]
Cars2	2.77	2.09	-3.11	0.00303	0.0466	-0.769	-1.7	cysteinyl-tRNA synthetase 2 (mitochondrial)(putative) [Source:MGI Symbol;Acc:MGI:1919191]
Fras1	3.98	4.8	3.11	0.00303	0.0466	0.824	1.77	Fraser syndrome 1 homolog (human) [Source:MGI Symbol;Acc:MGI:2385368]
Zdhhc9	5.25	5.57	3.11	0.00304	0.0467	0.33	1.26	zinc finger, DHHC domain containing 9 [Source:MGI Symbol;Acc:MGI:2444393]
Uck2	4.54	4.21	-3.11	0.00305	0.0468	-0.434	-1.35	uridine-cytidine kinase 2 [Source:MGI Symbol;Acc:MGI:1931744]
Zfp870	3.27	3.59	3.11	0.00306	0.0469	0.434	1.35	zinc finger protein 870 [Source:MGI Symbol;Acc:MGI:3029586]
Hyi	3.43	2.67	-3.11	0.00306	0.0469	-0.709	-1.63	hydroxypyruvate isomerase homolog (E. coli) [Source:MGI Symbol;Acc:MGI:1915430]
Mrpl38	4.86	4.29	-3.11	0.00306	0.0469	-0.688	-1.61	mitochondrial ribosomal protein L38 [Source:MGI Symbol;Acc:MGI:1926269]
Gm43111	-0.385	0.862	3.11	0.00306	0.0469	2.21	4.62	predicted gene 43111 [Source:MGI Symbol;Acc:MGI:5663248]
Gm15594	-2.38	-0.2	3.11	0.00307	0.0469	2.21	4.64	predicted gene 15594 [Source:MGI Symbol;Acc:MGI:3783041]
Smndc1	4.86	5.35	3.11	0.00308	0.047	0.5	1.41	survival motor neuron domain containing 1 [Source:MGI Symbol;Acc:MGI:1923729]
Ano5	2.9	3.53	3.11	0.00308	0.047	0.765	1.7	anoctamin 5 [Source:MGI Symbol;Acc:MGI:3576659]
Adat3	1.77	1	-3.11	0.00309	0.0471	-0.979	-1.97	adenosine deaminase, tRNA-specific 3 [Source:MGI Symbol;Acc:MGI:1924344]
Rlim	6.7	7.23	3.11	0.0031	0.0472	0.572	1.49	ring finger protein, LIM domain interacting [Source:MGI Symbol;Acc:MGI:1342291]
Phf13	4.7	4.3	-3.11	0.0031	0.0472	-0.377	-1.3	PHD finger protein 13 [Source:MGI Symbol;Acc:MGI:2446217]
Hccs	4.68	5.02	3.1	0.00311	0.0472	0.377	1.3	holocytochrome c synthetase [Source:MGI Symbol;Acc:MGI:106911]
Mtx3	6.1	6.55	3.1	0.00311	0.0472	0.416	1.33	metaxin 3 [Source:MGI Symbol;Acc:MGI:2686040]
Nat10	6.06	5.79	-3.1	0.00311	0.0472	-0.374	-1.3	N-acetyltransferase 10 [Source:MGI Symbol;Acc:MGI:2138939]
A230050P20Rik	6.17	5.68	-3.1	0.00312	0.0472	-0.531	-1.45	RIKEN cDNA A230050P20 gene [Source:MGI Symbol;Acc:MGI:2441788]
Rnf170	4.38	4.86	3.1	0.00312	0.0472	0.437	1.35	ring finger protein 170 [Source:MGI Symbol;Acc:MGI:1924983]
Timm50	4.79	4.18	-3.1	0.00312	0.0472	-0.643	-1.56	translocase of inner mitochondrial membrane 50 [Source:MGI Symbol;Acc:MGI:1913775]
Hivep2	6.15	6.8	3.1	0.00312	0.0472	0.645	1.56	human immunodeficiency virus type I enhancer binding protein 2 [Source:MGI Symbol;Acc:MGI:1338076]
Pcdhb21	0.377	1.59	3.1	0.00313	0.0474	1.31	2.48	protocadherin beta 21 [Source:MGI Symbol;Acc:MGI:2136759]
Gm16350	-0.476	-2.32	-3.1	0.00313	0.0473	-2.26	-4.77	predicted gene 16350 [Source:MGI Symbol;Acc:MGI:3840133]
Map7d1	7.46	7.02	-3.1	0.00314	0.0474	-0.432	-1.35	MAP7 domain containing 1 [Source:MGI Symbol;Acc:MGI:2384297]
E330009J07Rik	5.97	6.51	3.1	0.00316	0.0477	0.462	1.38	RIKEN cDNA E330009J07 gene [Source:MGI Symbol;Acc:MGI:2444256]
Tor1a	4.88	4.36	-3.1	0.00316	0.0477	-0.563	-1.48	torsin family 1, member A (torsin A) [Source:MGI Symbol;Acc:MGI:1353568]
Gm26782	3.12	3.77	3.1	0.00317	0.0477	0.731	1.66	predicted gene, 26782 [Source:MGI Symbol;Acc:MGI:5477276]
Esrrg	5.02	5.6	3.1	0.00317	0.0477	0.719	1.65	estrogen-related receptor gamma [Source:MGI Symbol;Acc:MGI:1347056]
Ankrd42	3.79	4.1	3.1	0.00317	0.0477	0.451	1.37	ankyrin repeat domain 42 [Source:MGI Symbol;Acc:MGI:1921095]
Fam120c	5.44	6.42	3.1	0.00318	0.0477	0.76	1.69	family with sequence similarity 120, member C [Source:MGI Symbol;Acc:MGI:2387687]
Igfbp3	3.67	3.22	-3.1	0.00318	0.0477	-0.527	-1.44	insulin-like growth factor binding protein 3 [Source:MGI Symbol;Acc:MGI:96438]
Pccb	5.51	5.13	-3.1	0.00319	0.0477	-0.443	-1.36	propionyl Coenzyme A carboxylase, beta polypeptide [Source:MGI Symbol;Acc:MGI:1914154]
Lmbr1	5.53	5.97	3.1	0.00319	0.0477	0.452	1.37	limb region 1 [Source:MGI Symbol;Acc:MGI:1861746]
Pacs1	6.04	5.81	-3.1	0.00319	0.0477	-0.383	-1.3	phosphofurin acidic cluster sorting protein 1 [Source:MGI Symbol;Acc:MGI:1277113]
Slc22a23	6.27	6.06	-3.09	0.0032	0.0477	-0.282	-1.22	solute carrier family 22, member 23 [Source:MGI Symbol;Acc:MGI:1920352]
Tfdp2	4.94	5.41	3.09	0.0032	0.0477	0.527	1.44	transcription factor Dp 2 [Source:MGI Symbol;Acc:MGI:107167]
Gm38162	-0.551	0.956	3.09	0.0032	0.0477	1.56	2.94	predicted gene, 38162 [Source:MGI Symbol;Acc:MGI:5611390]
Upf1	6.4	6.05	-3.09	0.00321	0.0479	-0.402	-1.32	UPF1 regulator of nonsense transcripts homolog (yeast) [Source:MGI Symbol;Acc:MGI:107995]
Mettl14	4.62	4.98	3.09	0.00321	0.0478	0.476	1.39	methyltransferase like 14 [Source:MGI Symbol;Acc:MGI:2442926]
Ptprb	4.46	5.01	3.09	0.00322	0.0479	0.589	1.5	protein tyrosine phosphatase, receptor type, B [Source:MGI Symbol;Acc:MGI:97809]
Gpatch4	4.23	3.4	-3.09	0.00322	0.0479	-0.649	-1.57	G patch domain containing 4 [Source:MGI Symbol;Acc:MGI:1913864]
Xk	4.67	5.23	3.09	0.00322	0.0479	0.498	1.41	Kell blood group precursor (McLeod phenotype) homolog [Source:MGI Symbol;Acc:MGI:103569]
Gm42639	2.56	3.2	3.09	0.00322	0.0479	0.93	1.9	predicted gene 42639 [Source:MGI Symbol;Acc:MGI:5662776]
Zbtb20	7.95	8.44	3.09	0.00323	0.0479	0.676	1.6	zinc finger and BTB domain containing 20 [Source:MGI Symbol;Acc:MGI:1929213]
Tmem229a	6.48	7.02	3.09	0.00323	0.0479	0.601	1.52	transmembrane protein 229A [Source:MGI Symbol;Acc:MGI:2442812]
Pla2g6	4.47	4.04	-3.09	0.00323	0.0479	-0.568	-1.48	phospholipase A2, group VI [Source:MGI Symbol;Acc:MGI:1859152]
Cpeb4	6.62	7.28	3.09	0.00324	0.0479	0.58	1.5	cytoplasmic polyadenylation element binding protein 4 [Source:MGI Symbol;Acc:MGI:1914829]
AW554918	4.12	4.53	3.09	0.00324	0.0479	0.411	1.33	expressed sequence AW554918 [Source:MGI Symbol;Acc:MGI:2147376]
Trp53inp2	7.22	7.55	3.09	0.00325	0.048	0.435	1.35	transformation related protein 53 inducible nuclear protein 2 [Source:MGI Symbol;Acc:MGI:1915978]
Pcdhb16	1.61	2.58	3.09	0.00325	0.048	1.06	2.09	protocadherin beta 16 [Source:MGI Symbol;Acc:MGI:2136752]
Ilf3	6.63	6.37	-3.09	0.00325	0.048	-0.345	-1.27	interleukin enhancer binding factor 3 [Source:MGI Symbol;Acc:MGI:1339973]
Ift172	6.42	6.17	-3.09	0.00325	0.048	-0.35	-1.27	intraflagellar transport 172 [Source:MGI Symbol;Acc:MGI:2682064]
Cyp2j6	4.85	5.14	3.09	0.00326	0.048	0.388	1.31	cytochrome P450, family 2, subfamily j, polypeptide 6 [Source:MGI Symbol;Acc:MGI:1270148]
Dld	7.14	7.6	3.09	0.00326	0.048	0.553	1.47	dihydrolipoamide dehydrogenase [Source:MGI Symbol;Acc:MGI:107450]
Ltn1	6.34	6.82	3.09	0.00327	0.048	0.454	1.37	listerin E3 ubiquitin protein ligase 1 [Source:MGI Symbol;Acc:MGI:1926163]
Tmem119	2.82	1.84	-3.09	0.00327	0.0481	-0.995	-1.99	transmembrane protein 119 [Source:MGI Symbol;Acc:MGI:2385228]
Atg4a	2.7	3.19	3.09	0.00328	0.0481	0.543	1.46	autophagy related 4A, cysteine peptidase [Source:MGI Symbol;Acc:MGI:2147903]
Rgs7	5.59	5.82	3.09	0.00328	0.0481	0.325	1.25	regulator of G protein signaling 7 [Source:MGI Symbol;Acc:MGI:1346089]
Dmpk	4.98	4.5	-3.08	0.00329	0.0481	-0.59	-1.51	dystrophia myotonica-protein kinase [Source:MGI Symbol;Acc:MGI:94906]
Zc3h4	5.97	5.7	-3.09	0.00329	0.0481	-0.368	-1.29	zinc finger CCCH-type containing 4 [Source:MGI Symbol;Acc:MGI:2682314]
Med16	5.49	4.98	-3.08	0.00329	0.0481	-0.532	-1.45	mediator complex subunit 16 [Source:MGI Symbol;Acc:MGI:2158394]
Zbtb37	2.73	3.79	3.08	0.0033	0.0481	0.989	1.99	zinc finger and BTB domain containing 37 [Source:MGI Symbol;Acc:MGI:2444467]
Gm38393	2.91	3.78	3.08	0.0033	0.0481	1.03	2.05	predicted gene, 38393 [Source:MGI Symbol;Acc:MGI:5613898]
Ccdc82	3.69	4.44	3.08	0.0033	0.0481	0.644	1.56	coiled-coil domain containing 82 [Source:MGI Symbol;Acc:MGI:1913646]
Ddx3x	7.53	8.01	3.08	0.0033	0.0481	0.411	1.33	DEAD/H (Asp-Glu-Ala-Asp/His) box polypeptide 3, X-linked [Source:MGI Symbol;Acc:MGI:103064]
Zfyve19	4.03	3.62	-3.08	0.00331	0.0481	-0.404	-1.32	zinc finger, FYVE domain containing 19 [Source:MGI Symbol;Acc:MGI:1919258]
Kmt2b	6.62	6.29	-3.08	0.00331	0.0481	-0.518	-1.43	lysine (K)-specific methyltransferase 2B [Source:MGI Symbol;Acc:MGI:109565]
Asphd1	5.16	4.5	-3.08	0.00331	0.0481	-0.549	-1.46	aspartate beta-hydroxylase domain containing 1 [Source:MGI Symbol;Acc:MGI:2685014]
Myo1h	1.85	1.2	-3.08	0.00332	0.0481	-0.818	-1.76	myosin 1H [Source:MGI Symbol;Acc:MGI:1914674]
Mbnl1	6.38	6.92	3.08	0.00332	0.0481	0.566	1.48	muscleblind-like 1 (Drosophila) [Source:MGI Symbol;Acc:MGI:1928482]
Gm37570	-1.23	0.45	3.08	0.00333	0.0481	1.69	3.23	predicted gene, 37570 [Source:MGI Symbol;Acc:MGI:5610798]
Ubl3	7.98	8.29	3.08	0.00333	0.0481	0.375	1.3	ubiquitin-like 3 [Source:MGI Symbol;Acc:MGI:1344373]
Brdt	3.76	4.2	3.08	0.00333	0.0481	0.554	1.47	bromodomain, testis-specific [Source:MGI Symbol;Acc:MGI:1891374]
Ankrd24	6.19	5.84	-3.08	0.00333	0.0481	-0.423	-1.34	ankyrin repeat domain 24 [Source:MGI Symbol;Acc:MGI:1890394]
Tm2d1	5.39	6.31	3.08	0.00333	0.0481	1.29	2.45	TM2 domain containing 1 [Source:MGI Symbol;Acc:MGI:2137022]
Gm26848	-0.518	0.667	3.08	0.00334	0.0481	1.52	2.88	predicted gene, 26848 [Source:MGI Symbol;Acc:MGI:5477342]
Gnb2	7.54	6.97	-3.08	0.00334	0.0481	-0.574	-1.49	guanine nucleotide binding protein (G protein), beta 2 [Source:MGI Symbol;Acc:MGI:95784]
Asl	4.69	4.09	-3.08	0.00334	0.0481	-0.705	-1.63	argininosuccinate lyase [Source:MGI Symbol;Acc:MGI:88084]
Ccdc157	5.99	5.57	-3.08	0.00334	0.0481	-0.478	-1.39	coiled-coil domain containing 157 [Source:MGI Symbol;Acc:MGI:3041210]
Txndc16	6.79	7.21	3.08	0.00334	0.0481	0.446	1.36	thioredoxin domain containing 16 [Source:MGI Symbol;Acc:MGI:1917811]
Arfgap1	6.37	6.03	-3.08	0.00334	0.0481	-0.432	-1.35	ADP-ribosylation factor GTPase activating protein 1 [Source:MGI Symbol;Acc:MGI:2183559]
Nr1d2	6.83	7.39	3.08	0.00334	0.0481	0.564	1.48	nuclear receptor subfamily 1, group D, member 2 [Source:MGI Symbol;Acc:MGI:2449205]
Jag2	6.28	5.93	-3.08	0.00334	0.0481	-0.513	-1.43	jagged 2 [Source:MGI Symbol;Acc:MGI:1098270]
Dhx36	6.98	7.4	3.08	0.00336	0.0481	0.422	1.34	DEAH (Asp-Glu-Ala-His) box polypeptide 36 [Source:MGI Symbol;Acc:MGI:1919412]
Zfp318	5.88	6.31	3.08	0.00336	0.0482	0.372	1.29	zinc finger protein 318 [Source:MGI Symbol;Acc:MGI:1889348]
Trip12	7.95	8.36	3.08	0.00336	0.0482	0.395	1.31	thyroid hormone receptor interactor 12 [Source:MGI Symbol;Acc:MGI:1309481]
Cep295	4.11	4.59	3.08	0.00336	0.0481	0.491	1.41	centrosomal protein 295 [Source:MGI Symbol;Acc:MGI:2442521]
Sphk2	4.81	4.28	-3.08	0.00337	0.0482	-0.615	-1.53	sphingosine kinase 2 [Source:MGI Symbol;Acc:MGI:1861380]
Zfp493	0.522	1.52	3.08	0.00337	0.0482	1.11	2.16	zinc finger protein 493 [Source:MGI Symbol;Acc:MGI:1920208]
Yme1l1	7.1	7.58	3.08	0.00337	0.0482	0.475	1.39	YME1-like 1 (S. cerevisiae) [Source:MGI Symbol;Acc:MGI:1351651]
Ppapdc1a	3.12	2.38	-3.08	0.00338	0.0482	-0.646	-1.56	phosphatidic acid phosphatase type 2 domain containing 1A [Source:MGI Symbol;Acc:MGI:2685936]
Ccdc101	3.21	2.5	-3.08	0.00338	0.0482	-0.809	-1.75	coiled-coil domain containing 101 [Source:MGI Symbol;Acc:MGI:1922815]
Ddx27	4.66	4.25	-3.07	0.00339	0.0483	-0.499	-1.41	DEAD (Asp-Glu-Ala-Asp) box polypeptide 27 [Source:MGI Symbol;Acc:MGI:2385884]
Wapl	6.05	6.47	3.07	0.00339	0.0483	0.489	1.4	WAPL cohesin release factor [Source:MGI Symbol;Acc:MGI:2675859]
Reps2	7.18	7.8	3.07	0.0034	0.0483	0.767	1.7	RALBP1 associated Eps domain containing protein 2 [Source:MGI Symbol;Acc:MGI:2663511]
Frrs1l	7.94	8.26	3.07	0.0034	0.0483	0.391	1.31	ferric-chelate reductase 1 like [Source:MGI Symbol;Acc:MGI:2442704]
Cep131	4.85	4.13	-3.07	0.0034	0.0483	-0.631	-1.55	centrosomal protein 131 [Source:MGI Symbol;Acc:MGI:107440]
Oaz2	6.8	6.48	-3.07	0.0034	0.0483	-0.421	-1.34	ornithine decarboxylase antizyme 2 [Source:MGI Symbol;Acc:MGI:109492]
Lrp1b	5.75	6.47	3.07	0.00341	0.0483	0.637	1.56	low density lipoprotein-related protein 1B (deleted in tumors) [Source:MGI Symbol;Acc:MGI:2151136]
Marf1	7.18	7.65	3.07	0.00341	0.0483	0.439	1.36	meiosis arrest female 1 [Source:MGI Symbol;Acc:MGI:2444505]
Usp38	5.21	5.56	3.07	0.00341	0.0483	0.458	1.37	ubiquitin specific peptidase 38 [Source:MGI Symbol;Acc:MGI:1922091]
Gm43300	0.506	1.78	3.07	0.00342	0.0483	1.36	2.57	predicted gene 43300 [Source:MGI Symbol;Acc:MGI:5663437]
Col4a2	6.38	6.04	-3.07	0.00342	0.0483	-0.586	-1.5	collagen, type IV, alpha 2 [Source:MGI Symbol;Acc:MGI:88455]
Rb1cc1	6.38	6.89	3.07	0.00343	0.0484	0.493	1.41	RB1-inducible coiled-coil 1 [Source:MGI Symbol;Acc:MGI:1341850]
Glmn	3.9	4.42	3.07	0.00343	0.0484	0.559	1.47	glomulin, FKBP associated protein [Source:MGI Symbol;Acc:MGI:2141180]
Rxrb	5.35	4.77	-3.07	0.00343	0.0484	-0.557	-1.47	retinoid X receptor beta [Source:MGI Symbol;Acc:MGI:98215]
Gm29237	2.18	3.5	3.07	0.00344	0.0485	1.04	2.06	predicted gene 29237 [Source:MGI Symbol;Acc:MGI:5579943]
Akna	2.2	1.66	-3.07	0.00344	0.0485	-0.73	-1.66	AT-hook transcription factor [Source:MGI Symbol;Acc:MGI:2140340]
Hsf1	5.13	4.71	-3.07	0.00344	0.0485	-0.466	-1.38	heat shock factor 1 [Source:MGI Symbol;Acc:MGI:96238]
Clk2	5.22	4.88	-3.07	0.00345	0.0485	-0.37	-1.29	CDC-like kinase 2 [Source:MGI Symbol;Acc:MGI:1098669]
Calr	8.4	7.94	-3.07	0.00346	0.0485	-0.426	-1.34	calreticulin [Source:MGI Symbol;Acc:MGI:88252]
Tnxb	3.91	3.4	-3.07	0.00346	0.0485	-0.701	-1.63	tenascin XB [Source:MGI Symbol;Acc:MGI:1932137]
Atp13a3	5.97	6.68	3.07	0.00347	0.0485	0.686	1.61	ATPase type 13A3 [Source:MGI Symbol;Acc:MGI:2685387]
Fbrs	4.9	4.5	-3.07	0.00347	0.0485	-0.411	-1.33	fibrosin [Source:MGI Symbol;Acc:MGI:104648]
Tomm70a	7.87	8.37	3.07	0.00347	0.0485	0.511	1.42	translocase of outer mitochondrial membrane 70 homolog A (yeast) [Source:MGI Symbol;Acc:MGI:106295]
Manbal	4.71	4.34	-3.07	0.00347	0.0485	-0.457	-1.37	mannosidase, beta A, lysosomal-like [Source:MGI Symbol;Acc:MGI:1916411]
Strip2	4.27	5.27	3.07	0.00347	0.0485	0.84	1.79	striatin interacting protein 2 [Source:MGI Symbol;Acc:MGI:2444363]
Tmem246	6.44	6.01	-3.07	0.00347	0.0485	-0.473	-1.39	transmembrane protein 246 [Source:MGI Symbol;Acc:MGI:1914313]
Crtc2	4.53	4.13	-3.07	0.00348	0.0485	-0.462	-1.38	CREB regulated transcription coactivator 2 [Source:MGI Symbol;Acc:MGI:1921593]
Sec24a	4.76	5.44	3.07	0.00348	0.0485	0.616	1.53	Sec24 related gene family, member A (S. cerevisiae) [Source:MGI Symbol;Acc:MGI:1924621]
Sphkap	6.51	7.18	3.06	0.00349	0.0486	0.627	1.54	SPHK1 interactor, AKAP domain containing [Source:MGI Symbol;Acc:MGI:1924879]
Ephb6	5.84	5.32	-3.06	0.00349	0.0486	-0.564	-1.48	Eph receptor B6 [Source:MGI Symbol;Acc:MGI:1096338]
Aifm3	7.01	6.6	-3.06	0.0035	0.0487	-0.467	-1.38	apoptosis-inducing factor, mitochondrion-associated 3 [Source:MGI Symbol;Acc:MGI:1919418]
Plxdc2	4.64	5.11	3.06	0.00351	0.0487	0.548	1.46	plexin domain containing 2 [Source:MGI Symbol;Acc:MGI:1914698]
Map2k6	2.59	3.11	3.06	0.00351	0.0487	0.661	1.58	mitogen-activated protein kinase kinase 6 [Source:MGI Symbol;Acc:MGI:1346870]
Rc3h2	6.26	6.98	3.06	0.00351	0.0487	0.729	1.66	ring finger and CCCH-type zinc finger domains 2 [Source:MGI Symbol;Acc:MGI:2442789]
Hsp90ab1	9.96	9.44	-3.06	0.00351	0.0487	-0.576	-1.49	heat shock protein 90 alpha (cytosolic), class B member 1 [Source:MGI Symbol;Acc:MGI:96247]
Rnf112	7.24	6.68	-3.06	0.00351	0.0487	-0.57	-1.48	ring finger protein 112 [Source:MGI Symbol;Acc:MGI:106611]
Trip11	5.61	6.2	3.06	0.00352	0.0487	0.563	1.48	thyroid hormone receptor interactor 11 [Source:MGI Symbol;Acc:MGI:1924393]
Hn1	5.81	5.3	-3.06	0.00352	0.0487	-0.501	-1.41	hematological and neurological expressed sequence 1 [Source:MGI Symbol;Acc:MGI:1096361]
Gm17024	0.495	1.55	3.06	0.00353	0.0487	1.09	2.12	predicted gene 17024 [Source:MGI Symbol;Acc:MGI:4937851]
Foxo4	4.22	3.78	-3.06	0.00353	0.0487	-0.512	-1.43	forkhead box O4 [Source:MGI Symbol;Acc:MGI:1891915]
C530005A16Rik	1.72	2.53	3.06	0.00353	0.0487	0.703	1.63	RIKEN cDNA C530005A16 gene [Source:MGI Symbol;Acc:MGI:3612454]
Plekhm2	6.31	5.95	-3.06	0.00353	0.0487	-0.509	-1.42	pleckstrin homology domain containing, family M (with RUN domain) member 2 [Source:MGI Symbol;Acc:MGI:1916832]
Ints5	4.42	3.99	-3.06	0.00354	0.0488	-0.428	-1.35	integrator complex subunit 5 [Source:MGI Symbol;Acc:MGI:1923578]
[truncated: 1,022 more rows]

## Sheet: HCA_Low
Symbol	HCA.Basal_3h.avg	HCA.Low_3h.avg	HCA_Low_3h.t	HCA_Low_3h.p	HCA_Low_3h.FDR	HCA_Low_3h.logFC	HCA_Low_3h.FC	Description
[truncated: 327 more rows]

[truncated: 3 more sheets: HCA_High, NAC_Low, NAC_High]
